# Supplementary material for: Brain Cell Atlas: An Integrative Ensemble of Cell Transcriptomes Across Human Brain Regions
Source: Research Square preprint supplement (doi:10.21203/rs.3.rs-3221500/v1), 2023-08-04
Supplement: Supplementary file 1 [file Supplementary Table 1.xlsx]

## Sheet: Sheet1
Name	Example values	Description
cell_ID	AGCCTATATTA_1	Index of ad.obs
	ACCTATATTTA_1	Cell barcode
seq_tech	10X
	Drop-seq
	Smart-seq
	Smart-seq2
	Smart-seq v4
	Slide-seq
	Microwell-seq
	Split-seq
	Fluidigm C1
donor_ID	1	Provided by author
	2
	3
	Sample33
	Unclassified
donor_gender	F
	M
	Unclassified
donor_age	21yr	For animals during the embryonic period a development time of 10.5 days is equivalent o "E10.5". Postnatal of 56 days after birth is denoted by P56.
	6mo
	P56	For human, the conversion of gestational age (GW) is 2 weeks plus the post conception weeks (PCW), i.e. GW = 2 weeks + PCW. For postnatal, 6 months old is denoted by 6mo; 21 years old is denoted by “21yr”.
	24w
		For organoids, use d (days in culture)
		Eg. 10d.
donor_status	Healthy	Disease status of the sample is corresponding to common names appears in MONDO Diseased Ontology.
	Epilepsy
	Unclassified	https://bioportal.bioontology.org/ontologies/MONDO/?p=classes&conceptid=root
orginal_name	Astrocyte	Original cell type annotation provided by the author
	Tumour
organ	Brain
region	Level 1 in Supplmentary Fig 2c	Anatomical structure level 1 (Please find anatomical structure naming of the brain in the document)
	Cerebral cortex
	Cerebellum
subregion	Highest level depends on the data	Anatomical structure level 2 (Please find anatomical structure naming of the brain in the document)
	e.g.
	Primary motor cortex
sample_status	Healthy	Disease status of each cell is corresponding to common names appears in MONDO Diseased Ontology.
	Alzheimer’s disease
	Gliomas	https://bioportal.bioontology.org/ontologies/MONDO/?p=classes&conceptid=root
treatment	Unclassified	The cell provider (individual)’s personal medical treatment, NOT the treatment for that cell
ethnicity	European
	Asian
	African American
	Unclassified
if_patient	’True‘
	’False‘
species	Homo sapiens
	Mus mucous
sample_type	Adult
	Fetal
	Tumour
	Organoid
seq_method	scRNA-seq
	snRNA-seq
project_code	GSE168015	GSE/SCP/E-MTAB-/PRJNA/EGAS/phs/PRJEB/SDY/SRP
	PR0331555
	EGAS00001004107	Or NA if no code
sample_ID	GSM10036	If not from GSE, use author_year_sample(batch key)
	Smith2021_fetalorganoid
(Annotation)
ACTINN
CHETAH
scArches
scmap
SingleR
ScPred
SingleCellNet
reference	doi
sample	Batch key
original_name2	Subcell type provided by the author	‘Unclassified’ if not provided
Do not remove any of the columns in the original adata.obs
