# Supplementary material for: Brain Cell Atlas: An Integrative Ensemble of Cell Transcriptomes Across Human Brain Regions
Source: Research Square preprint supplement (doi:10.21203/rs.3.rs-3221500/v1), 2023-08-04
Supplement: Supplementary file 4 [file Supplementary Table 2.xlsx]

## Sheet: Sheet1
	Manual annotation	NPC scoring	ACTINN	SCCAF	SingleR	scArches	singleCellNet
Mouse_Hochgerner et al.	494	1106	799	680	813	823	799
Fetus_Zhong et al.	95	584	386	390	515	584	322
Infant_Zhou et al.	23	18	13	5	10	6	1
Child_Zhou et al.	3	5	4	6	2	4	0
Adult_Zhou et al.	1	17	5	6	1	24	3
Adult_Tran et al.	0	0	0	4	0	0	0
Adult_Ayhan et al.	22	2	5	14	0	0	1
Adult_Franjic et al.	10	34	3	19	1	68	0
