# Supplementary material for: Brain Cell Atlas: An Integrative Ensemble of Cell Transcriptomes Across Human Brain Regions
Source: Research Square preprint supplement (doi:10.21203/rs.3.rs-3221500/v1), 2023-08-04
Supplement: Supplementary file 7 [file Supplementary Table 3.xlsx]

## Sheet: Sheet1
	p_val	avg_log2FC	pct.1	pct.2	p_val_adj
UBE2C	5.27642e-222	1.17588	0.539	0.014	7.17383e-218
BIRC5	2.6577e-215	1.00808	0.52	0.013	3.61341e-211
TOP2A	4.61905e-208	1.14787	0.535	0.017	6.28006e-204
PBK	3.90964e-204	0.907147	0.504	0.013	5.31555e-200
HMGB2	1.12637e-190	1.61461	0.724	0.08	1.53142e-186
EOMES	5.86534e-190	1.06637	0.594	0.035	7.97451e-186
CCNB2	1.78181e-189	0.905169	0.465	0.012	2.42255e-185
NUSAP1	3.11493e-185	0.997942	0.496	0.018	4.23506e-181
MKI67	5.46996e-183	0.940438	0.496	0.019	7.43695e-179
PRC1	6.77398e-180	0.851445	0.472	0.016	9.2099e-176
RRM2	5.1739e-178	0.80226	0.445	0.012	7.03444e-174
CENPF	8.5832e-177	1.14297	0.547	0.032	1.16697e-172
CDK1	5.71701e-173	0.80959	0.441	0.013	7.77284e-169
CENPM	3.43367e-172	0.747461	0.437	0.013	4.66842e-168
TPX2	1.08548e-169	0.812635	0.449	0.016	1.47582e-165
CKS2	3.26191e-165	1.11796	0.575	0.045	4.43489e-161
CDC20	2.39598e-164	0.800613	0.406	0.01	3.25757e-160
CKS1B	3.50286e-146	0.957728	0.571	0.055	4.76249e-142
CDCA3	5.30289e-141	0.662325	0.366	0.011	7.20981e-137
AURKB	1.19399e-139	0.581096	0.339	0.008	1.62335e-135
MAD2L1	5.55268e-139	0.75994	0.433	0.024	7.54942e-135
CDCA8	6.97995e-137	0.691771	0.382	0.016	9.48995e-133
CCNA2	6.71195e-134	0.713993	0.382	0.017	9.12556e-130
CDKN2C	1.02235e-131	0.68425	0.394	0.019	1.38998e-127
CCNB1	1.02793e-131	0.84804	0.398	0.02	1.39757e-127
SMC4	1.38123e-130	1.00047	0.579	0.069	1.87793e-126
ASPM	5.59325e-130	0.610193	0.331	0.009	7.60459e-126
CENPA	1.79922e-127	0.823738	0.39	0.021	2.44621e-123
NUF2	3.49439e-127	0.667147	0.386	0.02	4.75097e-123
TYMS	9.77028e-127	0.730916	0.417	0.026	1.32837e-122
CKAP2L	8.4552e-126	0.561027	0.343	0.012	1.14957e-121
TACC3	2.76836e-125	0.61378	0.366	0.017	3.76386e-121
MFAP4	3.78853e-125	0.702166	0.413	0.024	5.15088e-121
RACGAP1	1.28465e-122	0.691385	0.421	0.029	1.74661e-118
CENPE	1.82867e-117	0.673648	0.358	0.019	2.48626e-113
SPC24	9.98045e-117	0.515205	0.307	0.01	1.35694e-112
LMNB1	6.50844e-115	0.936221	0.598	0.092	8.84887e-111
MDK	9.39222e-114	1.12551	0.717	0.146	1.27697e-109
FBXO5	2.23786e-110	0.543003	0.331	0.016	3.04259e-106
CENPW	2.60821e-108	0.716258	0.488	0.055	3.54612e-104
UBE2T	5.60625e-107	0.73609	0.402	0.033	7.62226e-103
SPC25	6.80415e-101	0.73357	0.429	0.047	9.25092e-97
KNSTRN	2.47917e-98	0.672628	0.378	0.033	3.37067e-94
NEUROG2	3.24848e-98	0.677616	0.394	0.035	4.41664e-94
EZH2	4.06371e-94	0.838827	0.575	0.105	5.52502e-90
ANP32B	8.40314e-94	0.956731	0.646	0.149	1.14249e-89
SMC2	1.93413e-93	0.841587	0.539	0.089	2.62964e-89
TEX30	6.36394e-93	0.525419	0.374	0.033	8.65242e-89
HES6	6.66988e-93	1.04717	0.657	0.156	9.06836e-89
INSM1	8.68748e-93	0.578349	0.402	0.04	1.18115e-88
CLIC1	1.92906e-92	0.632457	0.445	0.052	2.62275e-88
TRIM59	1.8651e-91	0.500487	0.303	0.018	2.53579e-87
UBE2S	3.23484e-91	1.11897	0.665	0.175	4.39809e-87
CSRP2	3.32122e-90	0.882108	0.547	0.097	4.51553e-86
RAN	3.59893e-89	1.03965	0.748	0.25	4.89311e-85
RANBP1	1.62431e-87	1.02012	0.736	0.23	2.20842e-83
HNRNPAB	2.14168e-87	0.946751	0.665	0.163	2.91182e-83
ODC1	3.96066e-87	0.835569	0.602	0.122	5.38491e-83
SNRPB	1.70502e-86	0.868281	0.657	0.155	2.31815e-82
MCM7	8.48468e-85	0.711456	0.461	0.067	1.15358e-80
LSM2	2.89526e-84	0.752629	0.571	0.109	3.93639e-80
DEK	3.70721e-84	0.981901	0.681	0.201	5.04033e-80
CDK4	6.87757e-83	0.905407	0.638	0.152	9.35075e-79
ANP32E	7.81515e-82	0.82028	0.583	0.124	1.06255e-77
LSM5	5.38541e-79	0.851263	0.646	0.164	7.322e-75
ACTL6A	9.62689e-78	0.584393	0.461	0.07	1.30887e-73
TAC3	2.45256e-77	0.609858	0.272	0.019	3.3345e-73
DUT	4.10524e-77	0.918822	0.642	0.177	5.58148e-73
NSMCE4A	1.28597e-76	0.594252	0.476	0.077	1.74841e-72
RNASEH2A	2.47452e-76	0.547017	0.362	0.041	3.36436e-72
ASCL1	1.00569e-75	0.659953	0.429	0.062	1.36734e-71
LSM4	7.21506e-74	0.818352	0.626	0.161	9.8096e-70
DTYMK	3.3207e-72	0.697594	0.52	0.104	4.51482e-68
TUBA1B	9.93366e-72	1.08148	0.78	0.38	1.35058e-67
CCDC34	5.75663e-71	0.763381	0.567	0.135	7.82671e-67
ERH	2.96779e-69	0.907101	0.76	0.301	4.035e-65
SNRPE	9.39841e-67	0.831067	0.728	0.244	1.27781e-62
SNRPD1	4.20656e-66	0.792126	0.693	0.22	5.71924e-62
ELAVL2	9.86742e-66	0.748726	0.594	0.144	1.34157e-61
NT5DC2	2.54267e-65	0.546026	0.406	0.064	3.45702e-61
IGFBPL1	7.18576e-65	0.859554	0.409	0.068	9.76976e-61
PCNA	1.87267e-63	0.645406	0.37	0.058	2.54608e-59
VIM	2.45993e-63	0.712052	0.52	0.11	3.34452e-59
LSM3	2.46007e-63	0.744591	0.594	0.165	3.34471e-59
CKAP2	6.73205e-63	0.636945	0.382	0.065	9.15289e-59
USP1	8.92404e-63	0.624617	0.492	0.106	1.21331e-58
LGALS1	1.02213e-62	0.801449	0.398	0.069	1.38969e-58
SUMO2	2.69455e-62	0.866453	0.764	0.363	3.66351e-58
SNRPG	5.53703e-62	0.812223	0.693	0.235	7.52815e-58
TSEN34	6.60771e-62	0.634175	0.508	0.111	8.98384e-58
YBX1	6.90447e-62	0.888996	0.783	0.377	9.38732e-58
MARCKS	9.49094e-62	0.849733	0.803	0.357	1.29039e-57
HMGN1	1.07321e-61	0.896786	0.748	0.371	1.45914e-57
NDUFC2	1.85685e-61	0.813864	0.701	0.228	2.52457e-57
SNRPF	2.70267e-61	0.79798	0.705	0.249	3.67454e-57
BUB3	2.86272e-61	0.732584	0.559	0.15	3.89215e-57
NRXN1	5.19759e-61	-0.968168	0.476	0.811	7.06664e-57
PRDX1	1.46398e-60	0.857192	0.728	0.295	1.99043e-56
PPP1R14B	1.91107e-60	0.650355	0.457	0.092	2.59829e-56
PSMB6	5.31666e-60	0.741298	0.693	0.215	7.22854e-56
HDGF	1.60835e-59	0.69686	0.52	0.129	2.18671e-55
BANF1	1.89444e-59	0.741631	0.638	0.195	2.57568e-55
GTF2A2	1.99974e-59	0.716494	0.638	0.191	2.71885e-55
RRM1	3.88522e-59	0.540687	0.417	0.079	5.28235e-55
GADD45G	4.08048e-59	0.707503	0.52	0.122	5.54782e-55
SRSF1	1.15764e-57	0.654153	0.618	0.164	1.57392e-53
TUBB	2.2222e-57	0.949913	0.787	0.364	3.0213e-53
HINT1	2.4541e-57	0.816694	0.776	0.367	3.3366e-53
PAX6	3.71424e-57	0.549405	0.484	0.104	5.04987e-53
SRSF3	7.72828e-57	0.820582	0.728	0.332	1.05074e-52
MEX3A	1.03328e-56	0.60744	0.508	0.117	1.40485e-52
KIF22	2.02081e-56	0.518014	0.378	0.066	2.74749e-52
DDAH2	6.41315e-56	0.789645	0.677	0.214	8.71931e-52
CCND2	8.09974e-56	0.817129	0.614	0.198	1.10124e-51
SNRPC	1.52607e-55	0.610765	0.547	0.142	2.07485e-51
RPS20	2.62854e-55	0.822041	0.783	0.411	3.57376e-51
NUDCD2	1.03745e-54	0.607837	0.469	0.112	1.41052e-50
ILF2	1.43995e-54	0.720272	0.61	0.189	1.95775e-50
SOX11	1.51614e-54	0.85914	0.736	0.258	2.06134e-50
EMX1	1.65234e-54	0.53403	0.402	0.077	2.24652e-50
HNRNPF	1.66492e-54	0.705921	0.614	0.191	2.26363e-50
STMN1	2.79067e-54	0.918002	0.827	0.402	3.7942e-50
PSMA4	3.83062e-54	0.711299	0.669	0.226	5.20812e-50
DBF4	4.6203e-54	0.50006	0.323	0.052	6.28176e-50
POLE3	2.13531e-53	0.506886	0.378	0.071	2.90317e-49
ARL6IP1	2.28687e-53	0.891333	0.665	0.248	3.10923e-49
PSMB3	2.46317e-53	0.671106	0.622	0.194	3.34893e-49
RPS26	1.27148e-52	0.845388	0.732	0.302	1.7287e-48
LSM6	1.93388e-52	0.69076	0.551	0.167	2.6293e-48
GPX4	5.10984e-52	0.747512	0.74	0.296	6.94734e-48
NDUFA2	6.55709e-52	0.714031	0.665	0.218	8.91502e-48
TXN	7.58143e-52	0.74502	0.693	0.25	1.03077e-47
RALY	8.1589e-52	0.619136	0.571	0.164	1.10928e-47
EEF1B2	8.16233e-52	0.751513	0.681	0.253	1.10975e-47
ANAPC11	8.77964e-52	0.706511	0.602	0.201	1.19368e-47
PA2G4	9.35377e-52	0.625956	0.559	0.161	1.27174e-47
HNRNPA1	1.24743e-51	0.887438	0.752	0.371	1.69601e-47
NEDD8	3.98568e-51	0.697017	0.677	0.218	5.41893e-47
DCTPP1	7.12844e-51	0.564228	0.445	0.101	9.69182e-47
SEC61G	7.48281e-51	0.749075	0.713	0.273	1.01736e-46
TUBB4B	7.55536e-51	0.731697	0.531	0.158	1.02723e-46
SNRPD2	1.00039e-50	0.741622	0.736	0.283	1.36014e-46
MAPRE1	1.17038e-50	0.651442	0.579	0.174	1.59125e-46
COX5A	1.5404e-50	0.700052	0.665	0.226	2.09432e-46
LHX2	1.63566e-50	0.713759	0.594	0.2	2.22384e-46
U2AF1	2.28561e-50	0.688741	0.646	0.216	3.10752e-46
KRTCAP2	3.30175e-50	0.554027	0.547	0.139	4.48906e-46
RPS9	5.23146e-50	0.798565	0.787	0.444	7.11269e-46
CADM2	5.34836e-50	-1.16572	0.201	0.726	7.27163e-46
RPLP2	5.66756e-50	0.80901	0.807	0.439	7.70561e-46
HSPE1	7.65137e-50	0.695158	0.669	0.215	1.04028e-45
PDAP1	8.51593e-50	0.665506	0.61	0.196	1.15783e-45
MRPL52	8.84425e-50	0.616646	0.567	0.16	1.20246e-45
CCT7	1.07915e-49	0.668346	0.622	0.208	1.46721e-45
PPP1CA	2.00397e-49	0.666581	0.547	0.163	2.7246e-45
ENY2	2.60771e-49	0.666208	0.63	0.219	3.54545e-45
PTGES3	2.95084e-49	0.720507	0.724	0.328	4.01196e-45
RPS11	4.8066e-49	0.795695	0.783	0.419	6.53506e-45
RPS16	9.81342e-49	0.802005	0.795	0.396	1.33423e-44
PPP1CC	1.82633e-48	0.641422	0.622	0.207	2.48307e-44
SSRP1	2.84867e-48	0.602786	0.528	0.151	3.87305e-44
RPL28	4.05903e-48	0.769619	0.776	0.44	5.51866e-44
RPL8	4.95609e-48	0.787101	0.783	0.415	6.7383e-44
UBE2I	5.09999e-48	0.690435	0.646	0.248	6.93395e-44
BUD31	7.40166e-48	0.564794	0.504	0.134	1.00633e-43
RPLP1	8.76256e-48	0.769428	0.803	0.464	1.19136e-43
EIF3G	1.26234e-47	0.534962	0.504	0.132	1.71628e-43
RPL7A	1.45174e-47	0.799626	0.756	0.367	1.97379e-43
MRPL51	2.26893e-47	0.606234	0.547	0.165	3.08484e-43
NDUFA11	3.48165e-47	0.660705	0.669	0.22	4.73365e-43
SOX4	5.05439e-47	0.861115	0.748	0.27	6.87195e-43
CBX1	5.13866e-47	0.684656	0.618	0.223	6.98652e-43
CNBP	5.19429e-47	0.702564	0.701	0.291	7.06216e-43
CACYBP	8.86142e-47	0.626054	0.61	0.206	1.2048e-42
DBI	1.13906e-46	0.634698	0.669	0.223	1.54866e-42
OAZ1	1.51969e-46	0.748178	0.752	0.312	2.06617e-42
MAGOH	1.61955e-46	0.500593	0.461	0.118	2.20194e-42
DNAJC9	1.62652e-46	0.575517	0.5	0.149	2.21141e-42
HNRNPA3	1.66839e-46	0.696329	0.768	0.397	2.26834e-42
RPS5	1.85482e-46	0.803007	0.783	0.383	2.52181e-42
IER2	1.93761e-46	0.571686	0.465	0.115	2.63437e-42
SSNA1	2.30988e-46	0.51384	0.496	0.13	3.14051e-42
PTP4A1	2.3688e-46	0.560199	0.575	0.169	3.22062e-42
RPL23	3.17492e-46	0.781189	0.795	0.408	4.31662e-42
GRIA2	5.28457e-46	-0.957496	0.28	0.694	7.1849e-42
RPL10A	6.01415e-46	0.781774	0.772	0.404	8.17684e-42
MAF1	7.74835e-46	0.503508	0.492	0.128	1.05347e-41
NTM	8.79835e-46	-1.13253	0.134	0.617	1.19622e-41
RPS15A	9.14876e-46	0.82184	0.776	0.379	1.24387e-41
ZWINT	9.31422e-46	0.510953	0.398	0.085	1.26636e-41
TPM4	1.33826e-45	0.574071	0.496	0.144	1.8195e-41
COX8A	1.60307e-45	0.729252	0.748	0.285	2.17953e-41
LSAMP	2.43514e-45	-1.02712	0.315	0.733	3.31082e-41
SRSF7	3.5039e-45	0.694123	0.673	0.302	4.76391e-41
PFN1	5.19623e-45	0.699608	0.654	0.241	7.06479e-41
RPS6	5.32863e-45	0.781607	0.791	0.433	7.24481e-41
MZT1	6.02061e-45	0.555838	0.461	0.122	8.18562e-41
CFL2	6.71558e-45	0.581721	0.535	0.159	9.1305e-41
RPL18A	1.07395e-44	0.801923	0.76	0.348	1.46014e-40
RPL12	1.88088e-44	0.761053	0.74	0.337	2.55724e-40
RPS2	2.21412e-44	0.778953	0.799	0.417	3.01032e-40
NOP10	2.52649e-44	0.599987	0.579	0.181	3.43501e-40
LAPTM4A	3.83079e-44	0.675962	0.661	0.254	5.20835e-40
MIF	4.35018e-44	0.661141	0.65	0.219	5.9145e-40
RPS7	9.34656e-44	0.773915	0.772	0.398	1.27076e-39
IMPDH2	1.7912e-43	0.514385	0.461	0.119	2.43532e-39
FXYD6	2.12988e-43	0.66788	0.689	0.236	2.89578e-39
CCDC124	2.14481e-43	0.505249	0.484	0.132	2.91608e-39
TRMT112	2.17566e-43	0.55839	0.531	0.159	2.95803e-39
FKBP3	2.75579e-43	0.66287	0.638	0.255	3.74677e-39
RPL14	3.37927e-43	0.748636	0.787	0.445	4.59446e-39
RPS8	5.17028e-43	0.768644	0.823	0.467	7.02952e-39
NDUFB7	8.15221e-43	0.619943	0.65	0.233	1.10838e-38
HNRNPA2B1	1.09799e-42	0.653167	0.776	0.542	1.49283e-38
SIVA1	1.29636e-42	0.520401	0.453	0.123	1.76254e-38
UBALD2	1.65677e-42	0.558175	0.402	0.101	2.25255e-38
ROMO1	2.02479e-42	0.559992	0.587	0.181	2.7529e-38
FABP7	2.19374e-42	0.707116	0.61	0.212	2.98261e-38
RPL23A	2.52502e-42	0.755838	0.776	0.419	3.43301e-38
SKA2	2.55451e-42	0.506869	0.441	0.118	3.47311e-38
RPS15	2.90217e-42	0.748763	0.795	0.448	3.94578e-38
RPS21	3.26255e-42	0.732741	0.764	0.355	4.43576e-38
NDUFA6	3.98264e-42	0.58476	0.61	0.199	5.4148e-38
TMED2	5.88282e-42	0.608245	0.638	0.228	7.99828e-38
CSNK2B	6.07527e-42	0.521328	0.508	0.141	8.25994e-38
RPL19	6.2348e-42	0.739768	0.787	0.437	8.47683e-38
ANAPC13	7.28482e-42	0.558462	0.504	0.147	9.90444e-38
CALM2	7.36973e-42	0.741628	0.823	0.4	1.00199e-37
SYNE2	7.99027e-42	0.580205	0.488	0.144	1.08636e-37
NME1	8.17916e-42	0.611618	0.587	0.191	1.11204e-37
RPL27	8.34641e-42	0.717449	0.78	0.381	1.13478e-37
SERBP1	1.00992e-41	0.671427	0.701	0.322	1.37309e-37
LDHA	1.02825e-41	0.651077	0.5	0.161	1.398e-37
EIF4A1	1.25218e-41	0.704886	0.705	0.32	1.70246e-37
RAD21	1.47349e-41	0.677006	0.575	0.222	2.00336e-37
NCL	1.78008e-41	0.63959	0.689	0.274	2.42019e-37
IVNS1ABP	1.92542e-41	0.537675	0.52	0.161	2.6178e-37
VDAC2	2.28969e-41	0.626819	0.657	0.25	3.11306e-37
ATF4	2.39668e-41	0.531739	0.539	0.169	3.25853e-37
RPL36	2.63674e-41	0.739032	0.795	0.434	3.58491e-37
POLR2I	2.86904e-41	0.537161	0.535	0.16	3.90075e-37
SNRPD3	3.27354e-41	0.550213	0.539	0.174	4.45071e-37
ELAVL4	3.30973e-41	0.624361	0.614	0.229	4.49991e-37
RPS19	3.33699e-41	0.778547	0.823	0.463	4.53698e-37
TCP1	3.35048e-41	0.622053	0.614	0.233	4.55531e-37
MANF	3.50672e-41	0.509359	0.484	0.137	4.76774e-37
AURKAIP1	5.50745e-41	0.537159	0.535	0.167	7.48793e-37
RPS12	5.5551e-41	0.757089	0.752	0.396	7.55272e-37
FABP5	5.56025e-41	0.709486	0.709	0.291	7.55971e-37
MRPL18	5.8637e-41	0.510197	0.492	0.143	7.97229e-37
DLGAP1	6.13609e-41	-1.0777	0.161	0.613	8.34262e-37
MIS18BP1	6.84153e-41	0.550036	0.409	0.115	9.30175e-37
BTF3	8.25068e-41	0.714146	0.732	0.332	1.12176e-36
NRG3	8.37196e-41	-1.20917	0.122	0.577	1.13825e-36
TMEM258	9.76174e-41	0.63086	0.594	0.214	1.32721e-36
ZNF22	1.37333e-40	0.500724	0.508	0.148	1.86718e-36
CBX3	1.7945e-40	0.670086	0.65	0.265	2.4398e-36
RPS13	2.11502e-40	0.763054	0.783	0.384	2.87558e-36
TSN	5.32566e-40	0.587647	0.571	0.202	7.24077e-36
PPP3CA	1.03195e-39	-0.908441	0.287	0.661	1.40304e-35
RBFOX1	1.07802e-39	-1.15905	0.165	0.598	1.46567e-35
PARK7	1.21763e-39	0.661868	0.713	0.327	1.65548e-35
PSMA7	1.3028e-39	0.659952	0.685	0.298	1.77129e-35
HSPA8	1.39606e-39	0.709457	0.76	0.407	1.89808e-35
POLR2K	1.63974e-39	0.525999	0.559	0.178	2.22939e-35
EEF1D	1.68299e-39	0.610524	0.591	0.215	2.28819e-35
RPS25	1.93195e-39	0.737102	0.783	0.414	2.62668e-35
NDUFAB1	1.94216e-39	0.587595	0.634	0.234	2.64057e-35
PCBP2	2.01742e-39	0.632002	0.72	0.353	2.74289e-35
PRMT1	2.13698e-39	0.574929	0.583	0.203	2.90544e-35
SF3B5	2.49335e-39	0.520502	0.531	0.164	3.38995e-35
GNB2	2.8357e-39	0.596667	0.626	0.231	3.85541e-35
CARHSP1	3.50047e-39	0.55798	0.516	0.163	4.75923e-35
RPS14	3.81988e-39	0.752261	0.799	0.44	5.1935e-35
NUDT21	4.01116e-39	0.567418	0.504	0.17	5.45358e-35
CNTN1	4.06858e-39	-1.03889	0.075	0.54	5.53165e-35
NASP	4.21499e-39	0.632526	0.602	0.246	5.7307e-35
CWC15	4.24044e-39	0.534851	0.555	0.187	5.7653e-35
FAU	4.82633e-39	0.737484	0.787	0.408	6.56188e-35
DPY30	5.37212e-39	0.550967	0.579	0.206	7.30394e-35
RPL22	5.86576e-39	0.719092	0.728	0.345	7.97509e-35
RPL13	7.09528e-39	0.719735	0.823	0.51	9.64674e-35
NDUFS6	7.50311e-39	0.587562	0.618	0.225	1.02012e-34
CHD7	8.83245e-39	0.599352	0.563	0.21	1.20086e-34
SRSF9	1.01643e-38	0.533191	0.52	0.169	1.38194e-34
EIF4G2	1.49834e-38	0.660227	0.756	0.384	2.03714e-34
RPL32	1.51891e-38	0.74102	0.799	0.469	2.06512e-34
CHCHD2	2.11195e-38	0.693151	0.748	0.375	2.8714e-34
UBL5	2.70107e-38	0.642206	0.701	0.297	3.67237e-34
RPL13A	3.05638e-38	0.760158	0.772	0.45	4.15546e-34
DLG2	3.20577e-38	-1.04853	0.201	0.637	4.35856e-34
HDAC2	4.37236e-38	0.646418	0.661	0.29	5.94467e-34
NACA	4.64825e-38	0.69535	0.756	0.404	6.31976e-34
NAP1L1	5.15442e-38	0.608931	0.732	0.441	7.00795e-34
COX6B1	7.31407e-38	0.666713	0.756	0.347	9.94421e-34
HNRNPK	8.12169e-38	0.647416	0.752	0.444	1.10423e-33
FBLN1	1.05228e-37	0.540077	0.354	0.089	1.43068e-33
TBCB	1.06493e-37	0.593853	0.618	0.235	1.44788e-33
CFL1	1.44297e-37	0.668995	0.799	0.459	1.96186e-33
RPL4	1.48711e-37	0.713589	0.772	0.436	2.02187e-33
KIF5B	1.5432e-37	0.625283	0.681	0.326	2.09814e-33
ZCRB1	1.56456e-37	0.523103	0.555	0.186	2.12718e-33
LRP1B	1.63688e-37	-1.07703	0.114	0.593	2.2255e-33
PSMB1	3.04454e-37	0.608226	0.657	0.27	4.13935e-33
ANKS1B	6.01916e-37	-0.944721	0.189	0.62	8.18364e-33
EZR	6.68415e-37	0.517694	0.563	0.187	9.08776e-33
OST4	8.73231e-37	0.532224	0.567	0.191	1.18724e-32
CUEDC2	9.66781e-37	0.540052	0.551	0.188	1.31443e-32
PPDPF	9.99943e-37	0.640342	0.657	0.289	1.35952e-32
RPL30	1.23192e-36	0.699998	0.78	0.416	1.67492e-32
PAFAH1B3	1.30599e-36	0.564406	0.555	0.185	1.77563e-32
NDUFB9	1.35694e-36	0.579902	0.65	0.249	1.8449e-32
SEC61B	1.47554e-36	0.563563	0.626	0.238	2.00615e-32
BTF3L4	1.49665e-36	0.565997	0.61	0.242	2.03485e-32
UQCRQ	1.80977e-36	0.641168	0.705	0.302	2.46056e-32
EIF2S2	1.92853e-36	0.564926	0.606	0.236	2.62203e-32
DTNA	1.93308e-36	-1.0641	0.087	0.519	2.62822e-32
CD63	2.95157e-36	0.582986	0.591	0.218	4.01296e-32
COX6A1	3.31294e-36	0.618723	0.713	0.286	4.50427e-32
PFDN2	3.73893e-36	0.578087	0.661	0.267	5.08344e-32
ACTG1	3.98702e-36	0.66261	0.811	0.52	5.42075e-32
PCDH9	4.50475e-36	-1.02525	0.232	0.659	6.12466e-32
SYNCRIP	5.54785e-36	0.529545	0.535	0.192	7.54286e-32
RPS3A	5.62412e-36	0.76146	0.756	0.381	7.64655e-32
EIF3F	6.02324e-36	0.623093	0.689	0.31	8.18919e-32
TUBA1A	6.88595e-36	0.733754	0.839	0.513	9.36214e-32
COX6C	8.20791e-36	0.644842	0.772	0.389	1.11595e-31
KCNMA1	1.17682e-35	-0.999145	0.043	0.475	1.6e-31
RPL11	1.34424e-35	0.734222	0.811	0.446	1.82762e-31
UBB	1.5396e-35	0.671857	0.772	0.46	2.09324e-31
NAV3	1.71177e-35	-1.05454	0.087	0.538	2.32732e-31
CTNND2	1.76022e-35	-0.991649	0.22	0.599	2.3932e-31
RPL22L1	2.17829e-35	0.643471	0.575	0.205	2.9616e-31
IDH2	2.36246e-35	0.535733	0.48	0.164	3.21201e-31
PDCD5	2.4743e-35	0.551552	0.563	0.213	3.36406e-31
NUDC	2.59521e-35	0.559092	0.594	0.235	3.52845e-31
PPIB	2.707e-35	0.579058	0.61	0.232	3.68044e-31
UBA52	4.04833e-35	0.660067	0.72	0.367	5.50411e-31
TMA7	5.20268e-35	0.625481	0.728	0.34	7.07356e-31
RPL37A	5.40255e-35	0.706168	0.815	0.499	7.3453e-31
EEF2	5.61811e-35	0.677727	0.76	0.375	7.63838e-31
PSMC3	5.83923e-35	0.504771	0.492	0.159	7.93901e-31
SYNE1	6.44897e-35	-0.945321	0.11	0.551	8.76802e-31
EIF3I	9.58076e-35	0.5022	0.555	0.192	1.3026e-30
PSMB2	1.13657e-34	0.562341	0.575	0.226	1.54528e-30
HNRNPH3	1.7106e-34	0.616017	0.614	0.277	2.32574e-30
DAZAP1	1.82028e-34	0.533087	0.492	0.176	2.47485e-30
NDUFA4	2.16227e-34	0.643866	0.768	0.41	2.93982e-30
PSMB5	2.19454e-34	0.564151	0.606	0.244	2.9837e-30
COX4I1	2.32406e-34	0.655132	0.756	0.394	3.15979e-30
CCT4	3.02675e-34	0.568858	0.594	0.245	4.11517e-30
CTNNA2	3.0677e-34	-1.03268	0.197	0.57	4.17085e-30
RBX1	3.1053e-34	0.59376	0.689	0.326	4.22197e-30
RWDD1	3.47291e-34	0.506128	0.547	0.197	4.72177e-30
POLR2L	3.54653e-34	0.501654	0.488	0.163	4.82186e-30
UBXN1	3.79727e-34	0.504998	0.539	0.185	5.16276e-30
DNAJA1	3.96198e-34	0.617679	0.705	0.339	5.38671e-30
RPL7	4.02767e-34	0.736422	0.76	0.407	5.47603e-30
GABARAP	4.05944e-34	0.538652	0.614	0.218	5.51921e-30
COX7A2	4.73014e-34	0.639254	0.717	0.355	6.43109e-30
NDUFS5	4.76145e-34	0.618108	0.713	0.339	6.47366e-30
HNRNPA0	5.04063e-34	0.644395	0.606	0.263	6.85324e-30
FKBP4	5.25549e-34	0.510537	0.48	0.162	7.14537e-30
DAB1	6.7365e-34	-1.03564	0.071	0.479	9.15895e-30
NDUFA12	7.93428e-34	0.546677	0.594	0.231	1.07874e-29
NCAM2	8.43093e-34	-1.00973	0.161	0.574	1.14627e-29
HSP90AA1	1.31167e-33	0.564802	0.85	0.589	1.78335e-29
MARCKSL1	1.35281e-33	0.728628	0.756	0.368	1.83928e-29
TENM2	1.44005e-33	-0.997853	0.091	0.521	1.95789e-29
RPL3	1.63801e-33	0.729712	0.772	0.426	2.22704e-29
RPL27A	1.81367e-33	0.684497	0.783	0.444	2.46586e-29
NDUFA3	1.84291e-33	0.560344	0.646	0.251	2.50562e-29
CDK6	2.11726e-33	0.609017	0.413	0.141	2.87863e-29
G3BP1	2.15634e-33	0.523785	0.52	0.196	2.93176e-29
EGR1	2.32431e-33	0.515646	0.398	0.113	3.16013e-29
SUMO1	2.3951e-33	0.602153	0.693	0.34	3.25638e-29
YWHAQ	2.62901e-33	0.6044	0.744	0.431	3.5744e-29
TALDO1	2.95364e-33	0.510228	0.524	0.19	4.01576e-29
TRPM3	3.79279e-33	-1.05924	0.028	0.431	5.15668e-29
C19orf53	4.01268e-33	0.526868	0.567	0.212	5.45564e-29
RPL6	4.13886e-33	0.711342	0.78	0.434	5.6272e-29
CELF2	4.85149e-33	-0.51564	0.693	0.778	6.59608e-29
RPS17	5.26467e-33	0.666684	0.551	0.218	7.15785e-29
SSR2	1.13347e-32	0.535128	0.563	0.212	1.54106e-28
RPS29	1.22537e-32	0.71875	0.795	0.435	1.66602e-28
NTRK3	1.23137e-32	-0.848758	0.094	0.5	1.67417e-28
SF3B2	1.2666e-32	0.522455	0.598	0.24	1.72208e-28
SMDT1	1.52582e-32	0.546729	0.638	0.251	2.0745e-28
NDUFA13	1.83654e-32	0.576687	0.673	0.266	2.49696e-28
GPM6A	1.85583e-32	-0.523123	0.638	0.816	2.52319e-28
GABRB1	2.10257e-32	-0.885188	0.098	0.492	2.85865e-28
NEBL	3.64595e-32	-0.929044	0.071	0.47	4.95703e-28
RPL15	4.88457e-32	0.66709	0.772	0.448	6.64106e-28
PSIP1	5.40664e-32	0.587368	0.685	0.378	7.35087e-28
ANK2	7.32465e-32	-0.791155	0.339	0.661	9.9586e-28
RPS28	7.47876e-32	0.697729	0.768	0.392	1.01681e-27
RYR2	8.15473e-32	-1.05619	0.047	0.441	1.10872e-27
KALRN	8.85168e-32	-0.912376	0.154	0.539	1.20347e-27
GDI2	1.2209e-31	0.548994	0.591	0.252	1.65993e-27
DOCK4	1.28503e-31	-0.944046	0.102	0.508	1.74712e-27
GRIA1	1.29692e-31	-0.942799	0.142	0.518	1.76329e-27
AP2S1	1.46171e-31	0.501426	0.524	0.194	1.98734e-27
HNRNPR	1.55968e-31	0.577929	0.646	0.324	2.12054e-27
GRIN2B	1.99086e-31	-0.914704	0.091	0.483	2.70678e-27
MDH2	1.99233e-31	0.528241	0.591	0.235	2.70877e-27
AKR1A1	2.63886e-31	0.501152	0.528	0.191	3.5878e-27
CCT5	4.05647e-31	0.519567	0.539	0.213	5.51518e-27
C4orf48	6.1093e-31	0.564193	0.657	0.279	8.30621e-27
EEF1G	9.59662e-31	0.561043	0.567	0.215	1.30476e-26
ARPP19	1.02996e-30	0.541179	0.618	0.278	1.40034e-26
PCBP1	1.38749e-30	0.520222	0.555	0.224	1.88643e-26
COX7C	1.42106e-30	0.618353	0.783	0.426	1.93208e-26
STXBP5L	1.45886e-30	-1.00369	0.075	0.464	1.98347e-26
FRMD4A	1.57433e-30	-0.924682	0.236	0.572	2.14046e-26
CCT8	2.26368e-30	0.516137	0.559	0.226	3.0777e-26
VDAC3	2.44307e-30	0.53253	0.618	0.285	3.3216e-26
PTOV1	2.50343e-30	0.531943	0.598	0.25	3.40366e-26
COX5B	3.78515e-30	0.575221	0.709	0.32	5.14629e-26
RGS7	4.16774e-30	-0.914537	0.091	0.481	5.66645e-26
SSB	4.38453e-30	0.513861	0.575	0.24	5.96121e-26
UQCRB	6.42369e-30	0.577913	0.724	0.374	8.73364e-26
CBX5	6.7019e-30	0.541274	0.606	0.286	9.11191e-26
HNRNPM	9.49013e-30	0.556822	0.638	0.327	1.29028e-25
PSMA3	1.14835e-29	0.502472	0.583	0.246	1.5613e-25
RPL38	1.24643e-29	0.678288	0.799	0.42	1.69465e-25
C12orf57	1.37646e-29	0.562838	0.516	0.21	1.87144e-25
PPFIA2	1.51478e-29	-0.970681	0.122	0.494	2.0595e-25
ANK3	1.58968e-29	-0.888968	0.177	0.555	2.16133e-25
HNRNPD	1.68593e-29	0.542837	0.622	0.319	2.29219e-25
CAMK1D	3.25931e-29	-0.868772	0.11	0.461	4.43135e-25
CCT3	3.34854e-29	0.501783	0.543	0.223	4.55267e-25
FTL	3.50788e-29	0.601017	0.791	0.502	4.76932e-25
GABARAPL2	4.53758e-29	0.54039	0.685	0.317	6.16929e-25
MAGI2	5.36417e-29	-0.890073	0.22	0.592	7.29313e-25
CADM1	8.44618e-29	-0.759418	0.217	0.571	1.14834e-24
CSMD1	8.89985e-29	-1.00056	0.138	0.504	1.21002e-24
NFIX	1.30047e-28	0.57956	0.728	0.449	1.76812e-24
CENPV	1.30823e-28	0.54902	0.398	0.141	1.77867e-24
GALNT18	1.31359e-28	-0.825369	0.02	0.373	1.78596e-24
LIMCH1	1.37468e-28	-0.848617	0.098	0.465	1.86902e-24
PRKCE	1.57864e-28	-0.833527	0.13	0.478	2.14632e-24
ST6GALNAC5	1.58557e-28	-0.98352	0.043	0.404	2.15574e-24
DGKG	1.63329e-28	-0.845126	0.035	0.41	2.22062e-24
CACNA2D1	2.15567e-28	-0.832523	0.075	0.45	2.93084e-24
PCLO	2.56365e-28	-0.853938	0.051	0.416	3.48553e-24
GRM5	2.93298e-28	-0.873019	0.059	0.431	3.98768e-24
RFX3	3.33489e-28	-0.863403	0.197	0.516	4.53411e-24
HSP90AB1	3.89801e-28	0.543882	0.811	0.535	5.29973e-24
MRPS33	4.12251e-28	0.504796	0.461	0.173	5.60496e-24
LRRC4C	4.38281e-28	-0.865833	0.075	0.448	5.95886e-24
DST	5.58823e-28	-0.752749	0.299	0.624	7.59775e-24
NR3C2	9.17281e-28	-0.791113	0.02	0.378	1.24713e-23
GPHN	9.79128e-28	-0.844405	0.126	0.504	1.33122e-23
TPI1	1.06154e-27	0.551919	0.591	0.276	1.44327e-23
EIF3K	1.09453e-27	0.510101	0.63	0.282	1.48812e-23
MYT1L	1.10733e-27	-0.855869	0.118	0.459	1.50553e-23
TRIM9	1.23213e-27	-0.800976	0.165	0.5	1.6752e-23
AGBL4	1.3261e-27	-0.917353	0.051	0.418	1.80297e-23
KHDRBS1	1.40171e-27	0.539526	0.665	0.37	1.90577e-23
GRIN2A	1.43039e-27	-0.918341	0.047	0.415	1.94476e-23
NDUFB4	1.59631e-27	0.518976	0.602	0.266	2.17035e-23
TRA2B	2.32492e-27	0.534035	0.638	0.341	3.16096e-23
CAMK2B	2.91506e-27	-0.753098	0.079	0.451	3.96332e-23
HSPD1	2.93996e-27	0.518893	0.591	0.277	3.99717e-23
MACROD2	3.03347e-27	-0.808071	0.11	0.46	4.1243e-23
NKAIN2	3.86496e-27	-0.9066	0.083	0.453	5.2548e-23
SIPA1L1	5.18794e-27	-0.834907	0.114	0.46	7.05352e-23
RPL34	5.45579e-27	0.659306	0.791	0.434	7.41769e-23
SLC4A4	5.97519e-27	-0.770828	0.012	0.347	8.12387e-23
GNAS	6.06627e-27	0.518121	0.764	0.472	8.24771e-23
NRXN3	6.54236e-27	-0.934825	0.102	0.472	8.895e-23
FMN2	7.82965e-27	-0.805177	0.102	0.444	1.06452e-22
SLC25A3	1.14324e-26	0.519044	0.614	0.294	1.55436e-22
DOCK3	1.44175e-26	-0.832015	0.106	0.464	1.96021e-22
AHCYL2	1.51258e-26	-0.725193	0.055	0.411	2.05651e-22
MAPK10	1.56634e-26	-0.776051	0.244	0.564	2.12959e-22
NBEA	2.17865e-26	-0.824968	0.201	0.535	2.9621e-22
LRRC7	2.20378e-26	-0.881994	0.146	0.504	2.99626e-22
NDUFB2	3.23471e-26	0.519087	0.602	0.276	4.39791e-22
INPP4B	3.67782e-26	-0.8156	0.02	0.358	5.00037e-22
BTBD9	3.77598e-26	-0.841824	0.118	0.446	5.13383e-22
TMEM132B	4.78215e-26	-0.750627	0.071	0.415	6.50181e-22
EDF1	4.86788e-26	0.538694	0.654	0.327	6.61837e-22
CACNB2	5.25783e-26	-0.849409	0.055	0.417	7.14855e-22
DYNLRB1	6.99786e-26	0.502244	0.669	0.319	9.5143e-22
YWHAE	8.88499e-26	0.538288	0.791	0.523	1.208e-21
ACTB	1.08374e-25	0.555392	0.795	0.582	1.47346e-21
EPHA6	1.32933e-25	-0.850385	0.039	0.386	1.80735e-21
SMYD3	1.42544e-25	-0.823017	0.118	0.447	1.93803e-21
OPCML	1.70376e-25	-0.837524	0.114	0.488	2.31643e-21
LRRTM4	2.23939e-25	-0.877944	0.087	0.448	3.04467e-21
HNRNPDL	2.37952e-25	0.516924	0.693	0.462	3.2352e-21
PPM1E	2.44609e-25	-0.886215	0.083	0.421	3.32571e-21
KCND2	2.7948e-25	-0.785218	0.047	0.401	3.79981e-21
SLIT3	2.85245e-25	-0.894713	0.016	0.341	3.87818e-21
DPP6	3.49363e-25	-0.784388	0.146	0.492	4.74994e-21
UQCR10	4.67085e-25	0.500254	0.701	0.334	6.35049e-21
CACNA1E	4.79348e-25	-0.820532	0.043	0.381	6.51722e-21
PTK2	5.0873e-25	-0.781754	0.177	0.498	6.91669e-21
TUBB2B	5.25513e-25	0.620183	0.728	0.36	7.14487e-21
ERC2	5.55106e-25	-0.909699	0.079	0.414	7.54722e-21
FUS	5.7383e-25	0.501069	0.701	0.446	7.8018e-21
SEMA5A	5.86429e-25	-0.886907	0.039	0.363	7.97309e-21
SRP9	5.96961e-25	0.518396	0.602	0.302	8.11629e-21
FGF14	6.61396e-25	-0.858724	0.091	0.443	8.99234e-21
PKM	8.2985e-25	0.514697	0.669	0.399	1.12826e-20
PHACTR1	8.65957e-25	-0.759226	0.154	0.483	1.17736e-20
CAMK2A	9.05137e-25	-0.762769	0.051	0.392	1.23062e-20
NTRK2	1.09037e-24	-0.742202	0.13	0.492	1.48246e-20
PRKG1	1.51446e-24	-0.831345	0.063	0.401	2.05906e-20
NCOA1	2.59613e-24	-0.744518	0.173	0.486	3.5297e-20
MBD5	2.69779e-24	-0.763234	0.087	0.433	3.66792e-20
DPP10	2.9088e-24	-0.913397	0.106	0.448	3.95481e-20
CIRBP	3.38887e-24	0.518989	0.752	0.474	4.60751e-20
FOS	3.73383e-24	0.505152	0.484	0.191	5.07652e-20
RORA	4.5637e-24	-0.847603	0.142	0.462	6.2048e-20
CALN1	4.59979e-24	-0.728954	0.031	0.365	6.25387e-20
CACNA1B	5.45487e-24	-0.741389	0.031	0.352	7.41644e-20
PRKCA	5.45938e-24	-0.726815	0.118	0.452	7.42257e-20
FBXL17	9.7923e-24	-0.702321	0.059	0.388	1.33136e-19
SRP14	1.02427e-23	0.549835	0.681	0.364	1.3926e-19
PPP2R2B	1.05531e-23	-0.666901	0.358	0.634	1.43479e-19
TNR	1.06692e-23	-0.723367	0.035	0.352	1.45058e-19
SLC4A10	1.08505e-23	-0.764287	0.024	0.336	1.47523e-19
NEGR1	1.13079e-23	-0.760289	0.154	0.496	1.53742e-19
TNIK	1.47166e-23	-0.714249	0.22	0.52	2.00086e-19
ABLIM1	1.5453e-23	-0.683794	0.035	0.353	2.10099e-19
FMNL2	1.7426e-23	-0.688734	0.193	0.507	2.36924e-19
SPHKAP	1.83093e-23	-0.76195	0.031	0.344	2.48933e-19
NELL2	1.83263e-23	-0.809363	0.213	0.491	2.49165e-19
ARHGAP26	1.92962e-23	-0.674397	0.051	0.383	2.62352e-19
PDE4B	2.35674e-23	-0.707681	0.091	0.437	3.20422e-19
KCNJ3	3.48624e-23	-0.703787	0.031	0.348	4.73989e-19
RIMS1	4.05731e-23	-0.756261	0.043	0.354	5.51632e-19
AUTS2	4.13102e-23	-0.593361	0.488	0.645	5.61654e-19
ATP8A1	4.55955e-23	-0.678207	0.079	0.416	6.19917e-19
SGIP1	4.67156e-23	-0.656712	0.114	0.46	6.35146e-19
BRINP1	4.68599e-23	-0.654945	0.039	0.361	6.37107e-19
CSMD3	4.96022e-23	-0.862943	0.071	0.395	6.74391e-19
SYT1	5.31331e-23	-0.679977	0.37	0.643	7.22398e-19
NCAM1	5.67623e-23	-0.506769	0.531	0.687	7.7174e-19
LRFN5	6.61465e-23	-0.758532	0.067	0.384	8.99328e-19
AGAP1	7.04478e-23	-0.741302	0.157	0.448	9.57809e-19
PTK2B	7.34833e-23	-0.652209	0.016	0.317	9.99078e-19
TMEM108	7.95468e-23	-0.744748	0.122	0.421	1.08152e-18
RABGAP1L	8.21393e-23	-0.701844	0.106	0.423	1.11677e-18
DCLK1	8.35067e-23	-0.661003	0.335	0.58	1.13536e-18
SORL1	9.03139e-23	-0.641895	0.063	0.367	1.22791e-18
SHISA6	1.01107e-22	-0.73861	0.016	0.314	1.37465e-18
ADRA1A	1.06066e-22	-0.746227	0.016	0.319	1.44207e-18
RPS6KA2	1.6947e-22	-0.691278	0.055	0.364	2.30411e-18
DGKB	1.93452e-22	-0.812646	0.047	0.363	2.63018e-18
PARD3	2.27702e-22	-0.80036	0.142	0.433	3.09584e-18
KCTD16	2.43679e-22	-0.831897	0.055	0.368	3.31305e-18
GRM1	2.91723e-22	-0.785916	0.016	0.308	3.96626e-18
PLXNA4	3.22288e-22	-0.786851	0.071	0.364	4.38183e-18
MAP7	3.43534e-22	-0.684502	0.059	0.388	4.67069e-18
TIAM1	4.00607e-22	-0.777702	0.075	0.377	5.44666e-18
EDIL3	4.83997e-22	-0.802042	0.091	0.401	6.58043e-18
SNAP91	7.50689e-22	-0.642357	0.043	0.347	1.02064e-17
PGBD5	7.69705e-22	-0.637944	0.024	0.311	1.04649e-17
SLC24A3	1.00954e-21	-0.711801	0.059	0.363	1.37257e-17
SHISA9	1.17178e-21	-0.768298	0.055	0.355	1.59315e-17
MAML2	1.24897e-21	-0.748988	0.122	0.423	1.6981e-17
NRCAM	1.4889e-21	-0.7319	0.189	0.487	2.0243e-17
ARPP21	1.68735e-21	-0.664301	0.055	0.367	2.29413e-17
PLCB1	1.71164e-21	-0.727737	0.244	0.518	2.32714e-17
SPTBN4	1.89404e-21	-0.649186	0.043	0.325	2.57514e-17
HS6ST3	1.90363e-21	-0.763798	0.043	0.354	2.58818e-17
SIK3	2.33235e-21	-0.66033	0.134	0.473	3.17106e-17
DIP2C	2.38939e-21	-0.652448	0.106	0.407	3.24861e-17
STXBP5	2.61237e-21	-0.585147	0.039	0.346	3.55177e-17
MBNL2	3.00098e-21	-0.642183	0.11	0.412	4.08014e-17
DPYD	3.42041e-21	-0.714281	0.055	0.365	4.65039e-17
PTMS	3.57411e-21	0.51926	0.665	0.397	4.85936e-17
ZSWIM6	4.34358e-21	-0.639832	0.083	0.399	5.90554e-17
GRM7	5.56122e-21	-0.79478	0.067	0.364	7.56103e-17
ADAM22	6.26784e-21	-0.696453	0.055	0.337	8.52176e-17
CACNA1C	7.3719e-21	-0.700924	0.035	0.328	1.00228e-16
SPOCK3	7.53563e-21	-0.701862	0.043	0.339	1.02454e-16
KAZN	8.28737e-21	-0.682024	0.094	0.416	1.12675e-16
CLASP2	8.64193e-21	-0.623243	0.213	0.492	1.17496e-16
RAPGEF4	8.92338e-21	-0.635454	0.008	0.284	1.21322e-16
PFDN5	8.95212e-21	0.501364	0.736	0.388	1.21713e-16
UNC80	9.08675e-21	-0.610353	0.043	0.333	1.23544e-16
TANC2	9.84111e-21	-0.676121	0.126	0.415	1.338e-16
OSBPL6	1.12386e-20	-0.56486	0.035	0.316	1.528e-16
LINGO2	1.13329e-20	-0.743371	0.039	0.336	1.54082e-16
SORBS1	1.57718e-20	-0.70961	0.142	0.428	2.14434e-16
JAKMIP2	1.6418e-20	-0.626157	0.114	0.389	2.23219e-16
MAPT	1.78011e-20	-0.594831	0.248	0.496	2.42024e-16
ZFPM2	1.79497e-20	-0.783937	0.114	0.406	2.44044e-16
MED13L	1.8038e-20	-0.624094	0.154	0.436	2.45245e-16
C8orf34	1.81969e-20	-0.694171	0.035	0.315	2.47406e-16
CCSER1	1.8582e-20	-0.780205	0.118	0.417	2.52641e-16
CHL1	1.8885e-20	-0.61269	0.189	0.462	2.5676e-16
AKAP6	2.1674e-20	-0.656052	0.138	0.452	2.9468e-16
LMO3	2.59432e-20	-0.590671	0.091	0.369	3.52724e-16
GARNL3	2.64602e-20	-0.552943	0.024	0.304	3.59753e-16
GABBR2	3.58439e-20	-0.609109	0.043	0.34	4.87334e-16
PRICKLE2	3.62616e-20	-0.568181	0.043	0.335	4.93013e-16
CLSTN2	4.90919e-20	-0.819394	0.13	0.406	6.67453e-16
RIMBP2	5.08768e-20	-0.590941	0.008	0.274	6.91721e-16
SNAP25	5.46502e-20	-0.682713	0.26	0.517	7.43024e-16
LDHB	6.14612e-20	0.542	0.524	0.292	8.35626e-16
SPTBN1	6.78667e-20	-0.566033	0.268	0.535	9.22716e-16
NALCN	6.86015e-20	-0.587711	0.051	0.344	9.32705e-16
NAALADL2	7.43735e-20	-0.595548	0.047	0.335	1.01118e-15
VPS13B	1.10024e-19	-0.56154	0.071	0.362	1.49589e-15
SAMD12	1.1251e-19	-0.667907	0.035	0.313	1.52968e-15
CPEB3	1.13057e-19	-0.556233	0.043	0.322	1.53712e-15
KIRREL3	1.13508e-19	-0.747928	0.071	0.37	1.54326e-15
CNTN5	1.2943e-19	-0.722699	0.039	0.325	1.75973e-15
ARID1B	1.41596e-19	-0.644672	0.201	0.477	1.92514e-15
UPP2	1.47996e-19	-0.58892	0.024	0.29	2.01215e-15
PEX5L	1.5987e-19	-0.686787	0.083	0.391	2.17359e-15
CDK14	1.64161e-19	-0.606612	0.102	0.382	2.23193e-15
MCTP1	1.79905e-19	-0.7267	0.047	0.326	2.44599e-15
KSR2	1.96309e-19	-0.613026	0.028	0.297	2.66902e-15
CACNA2D3	2.0631e-19	-0.645672	0.075	0.375	2.805e-15
HIVEP3	2.38714e-19	-0.605749	0.067	0.346	3.24556e-15
JMJD1C	2.80013e-19	-0.60405	0.307	0.531	3.80706e-15
GRAMD1B	2.9637e-19	-0.609843	0.083	0.354	4.02944e-15
PCSK5	3.16747e-19	-0.529395	0.028	0.297	4.30649e-15
MAP3K5	3.42242e-19	-0.581737	0.031	0.302	4.65312e-15
ARNT2	3.46056e-19	-0.586757	0.091	0.364	4.70498e-15
PPP2R2C	3.47727e-19	-0.526313	0.047	0.322	4.72769e-15
NLGN1	3.66167e-19	-0.739912	0.244	0.514	4.9784e-15
TNRC6A	3.89902e-19	-0.620092	0.303	0.512	5.30111e-15
AK5	4.75142e-19	-0.614634	0.063	0.357	6.46004e-15
RGL1	4.77697e-19	-0.552711	0.055	0.332	6.49477e-15
TMEM232	5.01863e-19	-0.575382	0.028	0.296	6.82332e-15
UBR3	5.29809e-19	-0.580848	0.11	0.391	7.20328e-15
FGF12	5.47412e-19	-0.658327	0.055	0.332	7.44261e-15
SLC9A9	5.60772e-19	-0.511153	0.008	0.264	7.62426e-15
BCL11B	5.809e-19	-0.549175	0.043	0.313	7.89792e-15
VPS13C	5.83564e-19	-0.521562	0.028	0.29	7.93414e-15
TTC7B	5.88204e-19	-0.551567	0.043	0.308	7.99722e-15
GABRB3	5.91591e-19	-0.702484	0.154	0.419	8.04327e-15
PDE4D	6.06425e-19	-0.693009	0.15	0.453	8.24495e-15
DLGAP2	6.75876e-19	-0.752859	0.016	0.274	9.18921e-15
NPAS3	7.46058e-19	-0.736991	0.173	0.456	1.01434e-14
DSCAM	8.80154e-19	-0.662322	0.075	0.367	1.19666e-14
CCDC85A	8.98552e-19	-0.635027	0.016	0.27	1.22167e-14
KCNIP4	9.95303e-19	-0.883862	0.114	0.391	1.35321e-14
SLC24A2	1.07898e-18	-0.646319	0.091	0.396	1.46698e-14
BCAS3	1.17175e-18	-0.56479	0.087	0.362	1.59311e-14
LDLRAD4	1.30908e-18	-0.613886	0.083	0.344	1.77982e-14
EPHA7	1.64157e-18	-0.641275	0.063	0.322	2.23188e-14
SNED1	1.64324e-18	-0.532618	0.008	0.256	2.23415e-14
ARHGAP32	1.6756e-18	-0.583878	0.122	0.386	2.27815e-14
SLIT1	1.94438e-18	-0.546556	0.02	0.28	2.64359e-14
MAST4	2.24126e-18	-0.572255	0.087	0.357	3.04722e-14
FAM135B	2.33388e-18	-0.501526	0.016	0.273	3.17315e-14
DOCK10	2.4405e-18	-0.611874	0.047	0.331	3.31811e-14
ANO3	2.67201e-18	-0.549795	0.008	0.255	3.63286e-14
OSBP2	3.3782e-18	-0.505637	0.02	0.266	4.593e-14
FHIT	3.56697e-18	-0.609927	0.075	0.346	4.84965e-14
GRID1	3.64676e-18	-0.511111	0.047	0.324	4.95813e-14
SUSD4	3.66819e-18	-0.595766	0.028	0.281	4.98728e-14
CDC42BPA	3.70356e-18	-0.572038	0.224	0.481	5.03536e-14
GRIN1	3.85031e-18	-0.510169	0.012	0.256	5.23488e-14
RAPGEF2	3.93132e-18	-0.58918	0.091	0.373	5.34503e-14
SYN3	4.43344e-18	-0.587885	0.02	0.273	6.0277e-14
GNA14	5.73577e-18	-0.527443	0.004	0.243	7.79835e-14
SPOCK1	5.87749e-18	-0.61298	0.083	0.373	7.99103e-14
CDHR3	5.93839e-18	-0.530999	0.024	0.275	8.07384e-14
ABR	6.60111e-18	-0.524193	0.079	0.342	8.97486e-14
LGI1	6.88656e-18	-0.503349	0.059	0.325	9.36296e-14
GALNT13	7.91261e-18	-0.660314	0.043	0.309	1.0758e-13
TLL1	7.91836e-18	-0.6602	0.004	0.242	1.07658e-13
HIVEP2	8.92473e-18	-0.501248	0.047	0.315	1.21341e-13
PCSK2	9.7073e-18	-0.588213	0.035	0.286	1.3198e-13
ZBTB16	9.88407e-18	-0.521935	0.055	0.327	1.34384e-13
TRIO	1.02606e-17	-0.605647	0.185	0.439	1.39503e-13
GNAL	1.11013e-17	-0.546195	0.028	0.274	1.50933e-13
EXOC6B	1.12883e-17	-0.578541	0.13	0.409	1.53475e-13
DNM1	1.2005e-17	-0.531212	0.055	0.321	1.6322e-13
RAPGEF5	1.26423e-17	-0.578407	0.035	0.296	1.71885e-13
PSD3	1.3035e-17	-0.563064	0.154	0.431	1.77223e-13
KCNK1	1.35452e-17	-0.548617	0.028	0.272	1.84161e-13
PPP1R9A	1.4292e-17	-0.545439	0.232	0.472	1.94314e-13
CDH8	1.55345e-17	-0.628062	0.059	0.324	2.11207e-13
TSHZ2	1.57438e-17	-0.619768	0.035	0.285	2.14052e-13
PLCL1	1.74826e-17	-0.627951	0.067	0.341	2.37693e-13
XKR6	1.77633e-17	-0.584491	0.031	0.281	2.41509e-13
CSRNP3	1.81702e-17	-0.563867	0.114	0.374	2.47041e-13
MACF1	1.82626e-17	-0.560301	0.366	0.566	2.48298e-13
GABRB2	1.85029e-17	-0.590386	0.031	0.29	2.51565e-13
HSPA12A	2.0285e-17	-0.520604	0.028	0.273	2.75795e-13
NAV2	2.09213e-17	-0.583501	0.154	0.424	2.84446e-13
CHSY3	2.12507e-17	-0.625599	0.031	0.287	2.88925e-13
DPF3	2.33921e-17	-0.516138	0.047	0.298	3.18039e-13
SLC8A1	2.36595e-17	-0.611682	0.11	0.39	3.21674e-13
NIN	2.53287e-17	-0.545986	0.075	0.337	3.44369e-13
ERC1	2.7014e-17	-0.55731	0.157	0.427	3.67282e-13
DENND1A	2.7449e-17	-0.531454	0.087	0.349	3.73197e-13
HYDIN	2.8268e-17	-0.531677	0.035	0.286	3.84332e-13
OTUD7A	3.24186e-17	-0.531904	0.035	0.291	4.40764e-13
KCNQ3	3.27862e-17	-0.653376	0.146	0.391	4.45761e-13
TBC1D5	3.72491e-17	-0.587256	0.122	0.379	5.06439e-13
ARHGAP44	3.73675e-17	-0.568521	0.047	0.292	5.08049e-13
SCN8A	3.83996e-17	-0.558742	0.071	0.32	5.2208e-13
GABRG2	4.33291e-17	-0.503787	0.031	0.278	5.89103e-13
GRIK2	4.61877e-17	-0.677204	0.13	0.413	6.27968e-13
PLEKHA5	4.63421e-17	-0.628655	0.169	0.414	6.30067e-13
ADCY1	4.81894e-17	-0.537977	0.047	0.297	6.55182e-13
CDH18	5.10078e-17	-0.61678	0.02	0.262	6.93502e-13
PPFIBP1	5.19343e-17	-0.522037	0.024	0.266	7.06099e-13
CELF4	5.95778e-17	-0.591472	0.217	0.46	8.10019e-13
PTPRD	5.96161e-17	-0.582815	0.244	0.517	8.10541e-13
CHN1	6.28141e-17	-0.585252	0.236	0.467	8.5402e-13
CDH9	6.47841e-17	-0.586785	0.02	0.262	8.80805e-13
ATXN1	6.49712e-17	-0.532905	0.114	0.402	8.83349e-13
ADCY2	6.60064e-17	-0.564486	0.059	0.318	8.97423e-13
MICAL3	9.80848e-17	-0.534929	0.094	0.343	1.33356e-12
UNC13C	1.11917e-16	-0.541897	0	0.221	1.52162e-12
GDAP1	1.17492e-16	-0.555409	0.161	0.391	1.59743e-12
FOCAD	1.30366e-16	-0.512834	0.059	0.316	1.77246e-12
ATP2B2	1.36349e-16	-0.500366	0.083	0.337	1.8538e-12
PPP1R12B	1.51371e-16	-0.506051	0.094	0.355	2.05804e-12
DCLK2	1.64889e-16	-0.594143	0.181	0.412	2.24182e-12
RYR3	1.84228e-16	-0.631247	0.028	0.265	2.50476e-12
SNTG1	1.8566e-16	-0.640848	0.114	0.386	2.52424e-12
EPHA5	1.96568e-16	-0.545117	0.094	0.34	2.67254e-12
PTPRO	2.2277e-16	-0.5675	0.067	0.304	3.02878e-12
WWOX	2.45832e-16	-0.640881	0.11	0.366	3.34233e-12
SOBP	2.76752e-16	-0.515115	0.146	0.407	3.76272e-12
PDE4DIP	3.28833e-16	-0.628249	0.252	0.462	4.47081e-12
NRP1	3.39411e-16	-0.577729	0.181	0.407	4.61463e-12
NEK10	3.44839e-16	-0.522588	0.016	0.243	4.68843e-12
SLCO3A1	3.85414e-16	-0.503021	0.051	0.291	5.24009e-12
PCDH7	4.47019e-16	-0.564771	0.138	0.387	6.07768e-12
PCDH15	5.50775e-16	-0.615801	0.063	0.327	7.48834e-12
SPIDR	5.71512e-16	-0.577111	0.122	0.358	7.77028e-12
IMMP2L	5.76352e-16	-0.538245	0.087	0.333	7.83608e-12
DAPK1	6.51943e-16	-0.556833	0.169	0.401	8.86381e-12
EIF4G3	6.78793e-16	-0.529321	0.24	0.474	9.22887e-12
DGKI	7.73912e-16	-0.604289	0.063	0.309	1.05221e-11
ZMAT4	7.98794e-16	-0.538792	0.016	0.239	1.08604e-11
DYNC1I1	1.16764e-15	-0.518968	0.063	0.321	1.58752e-11
KLHL2	1.22703e-15	-0.547513	0.091	0.333	1.66827e-11
ASIC2	1.23446e-15	-0.530375	0.039	0.282	1.67837e-11
ENOX1	1.31277e-15	-0.506383	0.087	0.333	1.78484e-11
CNTNAP2	1.4898e-15	-0.639511	0.15	0.404	2.02553e-11
GLS	2.16485e-15	-0.513965	0.098	0.331	2.94333e-11
FRMD5	3.22123e-15	-0.533742	0.094	0.339	4.37959e-11
MKLN1	3.29155e-15	-0.540812	0.22	0.453	4.47519e-11
EXOC4	3.32465e-15	-0.537376	0.209	0.426	4.52019e-11
ATP8A2	3.68527e-15	-0.580306	0.067	0.313	5.0105e-11
ADD3	4.30098e-15	-0.532137	0.181	0.411	5.84761e-11
FAT3	4.90849e-15	-0.532098	0.102	0.331	6.67358e-11
KCNQ5	5.56467e-15	-0.549514	0.051	0.284	7.56573e-11
SCN3A	7.1621e-15	-0.504766	0.075	0.301	9.73759e-11
RASAL2	7.5772e-15	-0.58795	0.15	0.375	1.0302e-10
SIPA1L3	7.67081e-15	-0.520619	0.091	0.323	1.04292e-10
CA10	7.88733e-15	-0.573514	0.063	0.286	1.07236e-10
UNC79	8.05795e-15	-0.503448	0.059	0.288	1.09556e-10
ERBB4	8.29167e-15	-0.632856	0.102	0.345	1.12734e-10
UNC5D	8.30646e-15	-0.565671	0.087	0.31	1.12935e-10
LDB2	8.96982e-15	-0.551198	0.059	0.292	1.21954e-10
RIMS2	1.0593e-14	-0.521685	0.059	0.292	1.44022e-10
NSF	1.11534e-14	-0.524748	0.11	0.331	1.51641e-10
RALYL	1.22968e-14	-0.507571	0.091	0.336	1.67188e-10
ZNF804A	1.61287e-14	-0.538383	0.063	0.281	2.19286e-10
ASTN1	2.09664e-14	-0.511063	0.154	0.367	2.8506e-10
MDGA2	2.11393e-14	-0.54322	0.079	0.327	2.8741e-10
TRPS1	2.33154e-14	-0.581042	0.079	0.294	3.16996e-10
CAMK2N1	2.36377e-14	-0.518784	0.173	0.402	3.21378e-10
CEP112	2.39411e-14	-0.511504	0.083	0.305	3.25504e-10
DCC	3.0499e-14	-0.60328	0.122	0.358	4.14665e-10
SLC35F3	3.98484e-14	-0.629604	0.063	0.274	5.41779e-10
PTPRN2	6.14119e-14	-0.574646	0.075	0.287	8.34957e-10
TMEFF2	6.35069e-14	-0.510255	0.11	0.354	8.6344e-10
MGAT4C	7.37352e-14	-0.564674	0.043	0.256	1.0025e-09
TMSB10	8.82429e-14	0.55177	0.559	0.371	1.19975e-09
GPC5	9.46286e-14	-0.690932	0.051	0.261	1.28657e-09
SYNPR	1.23045e-13	-0.570374	0.177	0.375	1.67292e-09
PDE1A	1.75252e-13	-0.553267	0.13	0.341	2.38272e-09
NRG1	1.11665e-12	-0.541795	0.067	0.266	1.51819e-08
GLIS3	1.64492e-12	-0.517946	0.043	0.235	2.23643e-08
AKT3	1.88864e-12	-0.568314	0.193	0.387	2.5678e-08
PTPRK	3.25115e-12	-0.516978	0.118	0.324	4.42027e-08
NKAIN3	5.12165e-12	-0.511941	0.335	0.488	6.9634e-08
SLC1A2	1.23029e-11	-0.550711	0.39	0.544	1.6727e-07
AFF3	3.68398e-10	-0.529453	0.213	0.359	5.00874e-06
PITPNC1	3.07058e-09	-0.535339	0.181	0.338	4.17476e-05
