# Supplementary material for: Brain Cell Atlas: An Integrative Ensemble of Cell Transcriptomes Across Human Brain Regions
Source: Research Square preprint supplement (doi:10.21203/rs.3.rs-3221500/v1), 2023-08-04
Supplement: Supplementary file 10 [file Supplementary Table 4.xlsx]

## Sheet: Sheet1
NPC score	Mouse_Hochgerner et al.	Fetus_Zhong et al.	Infant_Zhou et al.	Child_Zhou et al.	Adult_Zhou et al.	Adult_Tran et al.	Adult_Ayhan et al.	Adult_Franjic et al.
1	3635	6166	491	359	550	627	1508	10206
2	1484	1023	42	22	45	29	10	467
3	1106	584	18	5	17	0	2	34
4	933	483	5	1	6	0	0	12
5	781	405	1	0	2	0	0	9
6	624	337	0	0	1	0	0	2
7	448	245	0	0	0	0	0	1
8	196	131	0	0	0	0	0	1
