# Supplementary material for: Brain Cell Atlas: An Integrative Ensemble of Cell Transcriptomes Across Human Brain Regions
Source: Research Square preprint supplement (doi:10.21203/rs.3.rs-3221500/v1), 2023-08-04
Supplement: Supplementary file 13 [file Supplementary Table 5.xlsx]

## Sheet: Sheet1
	p_val	avg_log2FC	pct.1	pct.2	p_val_adj
AC016831.7	0	1.37469	0.752	0.012	0
AC026316.5	0	1.04526	0.513	0	0
AC074327.1	0	1.57737	0.769	0	0
AC244021.1	0	0.997576	0.581	0.008	0
ATRX	0	1.04578	0.598	0.009	0
BABAM2	0	1.00876	0.573	0.007	0
COP1	0	1.09155	0.65	0.007	0
DIAPH2	0	1.49	0.846	0.011	0
DLEU2	0	1.36886	0.795	0.011	0
DLEU7-AS1	0	0.923919	0.47	0	0
FP671120.1	0	1.28762	0.701	0	0
FTX	0	1.59129	0.872	0.013	0
GPM6B	0	1.27054	0.667	0.009	0
IL1RAPL1	0	1.81117	0.906	0.014	0
KDM6A	0	0.985447	0.556	0.007	0
LAMP2	0	0.949477	0.556	0.005	0
LINC00486	0	0.970479	0.53	0.001	0
LRMDA	0	2.08081	0.991	0.014	0
MALAT1	0	2.51683	1	0.015	0
MIR99AHG	0	1.15475	0.632	0.011	0
MT-ATP6	0	1.28106	0.667	0.011	0
MT-CO1	0	1.37914	0.761	0.008	0
MT-CO2	0	1.50402	0.795	0.011	0
MT-CO3	0	1.42302	0.795	0.012	0
MT-ND3	0	1.64042	0.829	0.01	0
MT-ND4	0	1.39619	0.752	0.01	0
NEAT1	0	1.99602	0.974	0.013	0
NUTM2A-AS1	0	0.964398	0.547	0.005	0
PLP1	0	1.38676	0.709	0.013	0
SAT1	0	1.12021	0.607	0.009	0
SH3BGRL	0	0.975235	0.547	0.006	0
SH3KBP1	0	1.11843	0.607	0.008	0
TENT2	0	1.04053	0.59	0.006	0
TMSB4X	0	1.28557	0.701	0.01	0
PRKN	6.91079e-307	1.14775	0.607	0.01	2.51442e-302
XIST	3.91086e-302	1.10712	0.419	0.001	1.42293e-297
HDAC8	5.83631e-302	0.721373	0.393	0	2.12348e-297
RPS6KA3	2.85972e-301	0.955171	0.521	0.005	1.04048e-296
LINC02232	1.61117e-297	1.01231	0.521	0.006	5.86207e-293
MT-ND2	3.43616e-290	1.10452	0.581	0.01	1.25021e-285
MIR181A1HG	2.71579e-288	0.9466	0.513	0.006	9.88113e-284
MIR646HG	6.09325e-285	0.918158	0.47	0.004	2.21697e-280
DOCK11	2.63587e-284	0.945711	0.513	0.006	9.59035e-280
HDAC2-AS2	1.22864e-280	0.903294	0.504	0.006	4.4703e-276
AC006978.2	4.39689e-277	0.774998	0.436	0.003	1.59976e-272
ARHGAP6	1.35594e-276	0.953226	0.487	0.005	4.93344e-272
IL13RA1	1.31176e-264	0.823831	0.487	0.006	4.7727e-260
CCDC26	1.34633e-263	1.01186	0.41	0.003	4.89848e-259
ENOX2	1.36262e-263	0.804619	0.436	0.004	4.95776e-259
TUT4	4.50388e-262	0.865988	0.487	0.007	1.63869e-257
ENTPD1-AS1	5.30473e-259	0.875074	0.479	0.006	1.93007e-254
THOC2	1.2974e-256	0.684619	0.427	0.004	4.72047e-252
ARMH3	4.69032e-256	0.842759	0.479	0.007	1.70653e-251
USP9X	3.03445e-255	0.744164	0.436	0.004	1.10405e-250
JPX	1.81924e-253	0.859287	0.47	0.006	6.61914e-249
FAM157C	2.5196e-250	0.702832	0.393	0.003	9.16732e-246
MT-ND1	5.28176e-250	0.996434	0.53	0.01	1.92172e-245
MSN	5.22126e-249	0.747287	0.41	0.003	1.8997e-244
AC118549.1	1.6493e-246	0.757546	0.419	0.004	6.00082e-242
NUTM2B-AS1	8.88878e-245	0.746458	0.427	0.005	3.23409e-240
ZFX	3.42981e-243	0.613678	0.342	0.001	1.2479e-238
TMEM131L	1.03783e-238	0.673458	0.385	0.003	3.77605e-234
CYBC1	4.45528e-236	0.597894	0.325	0.001	1.62101e-231
MT-CYB	2.25165e-235	0.959554	0.504	0.01	8.19241e-231
AL359091.1	2.62753e-234	0.697122	0.359	0.002	9.56002e-230
TUT7	3.18914e-234	0.676024	0.402	0.004	1.16034e-229
FP236383.1	1.8705e-233	0.87689	0.462	0.008	6.80564e-229
OGA	6.12238e-232	0.687582	0.41	0.005	2.22757e-227
ALG13	4.17304e-230	0.730001	0.385	0.003	1.51832e-225
ECPAS	8.34527e-230	0.676051	0.385	0.003	3.03634e-225
LMCD1-AS1	2.11191e-229	0.810618	0.427	0.006	7.68398e-225
MIR29B2CHG	2.91921e-226	0.734615	0.402	0.005	1.06212e-221
ACSL4	3.57321e-226	0.654878	0.368	0.003	1.30008e-221
GRK3	1.59594e-225	0.78252	0.436	0.007	5.80667e-221
RPL10	8.39449e-225	0.670713	0.359	0.003	3.05425e-220
IDS	5.29916e-223	0.500782	0.291	0	1.92805e-218
COLGALT1	1.11772e-222	0.59404	0.35	0.002	4.0667e-218
LINC00623	1.53978e-217	0.657947	0.368	0.003	5.60235e-213
DMD	1.06157e-215	0.799899	0.427	0.007	3.86243e-211
LINC01684	2.9647e-215	0.663559	0.333	0.002	1.07868e-210
STAG2	1.33939e-213	0.772148	0.427	0.007	4.87323e-209
MUC20-OT1	1.49186e-212	0.675111	0.393	0.005	5.42798e-208
AC007262.2	8.64217e-212	0.717224	0.359	0.003	3.14437e-207
HAMP	2.5799e-211	0.629923	0.308	0.001	9.38672e-207
GMDS-DT	2.09953e-208	0.722011	0.402	0.006	7.63894e-204
CASK	3.40419e-205	0.682053	0.393	0.006	1.23858e-200
SLC26A3	2.41125e-204	0.95566	0.479	0.012	8.77308e-200
VSIG4	1.80012e-203	0.699004	0.342	0.003	6.54955e-199
ARHGEF6	6.84138e-203	0.629361	0.342	0.003	2.48917e-198
AC245297.3	1.27044e-201	0.723008	0.402	0.007	4.62236e-197
LINC01094	2.80755e-199	0.643867	0.359	0.004	1.0215e-194
OGT	1.18783e-198	0.582322	0.342	0.003	4.3218e-194
AC005154.6	8.5427e-197	0.468083	0.256	0	3.10818e-192
SELENOW	1.1552e-195	0.539333	0.308	0.002	4.20307e-191
TPTEP2-CSNK1E	1.29618e-195	0.556566	0.308	0.002	4.71602e-191
RUBCNL	2.22718e-193	0.635367	0.35	0.004	8.10336e-189
AC066613.2	4.64142e-193	0.546827	0.291	0.001	1.68874e-188
HUWE1	7.24835e-193	0.608174	0.35	0.004	2.63724e-188
TAF1	1.69985e-192	0.527378	0.316	0.003	6.18472e-188
GDI1	4.90229e-192	0.531143	0.282	0.001	1.78365e-187
RETREG1	4.4101e-191	0.582107	0.308	0.002	1.60457e-186
AC013394.1	3.37354e-190	0.568391	0.325	0.003	1.22743e-185
TRAF3IP2-AS1	7.90045e-189	0.623202	0.333	0.004	2.8745e-184
AP003086.2	3.63049e-188	0.620581	0.359	0.005	1.32092e-183
AC025569.1	8.25621e-187	0.545185	0.282	0.001	3.00394e-182
ATP11C	3.39184e-186	0.573705	0.325	0.003	1.23409e-181
LINC01410	5.90922e-184	0.493376	0.256	0.001	2.15001e-179
TENM4	6.98988e-182	0.681779	0.359	0.006	2.5432e-177
LINC00894	2.86873e-180	0.552046	0.299	0.003	1.04376e-175
AC116366.3	4.95635e-180	0.490424	0.274	0.001	1.80332e-175
LINC02256	1.59888e-178	0.549763	0.325	0.004	5.81735e-174
SHROOM4	1.15072e-177	0.587195	0.333	0.005	4.1868e-173
AC120193.1	3.51424e-177	0.609428	0.333	0.005	1.27862e-172
ARHGAP45	9.8241e-177	0.498752	0.282	0.002	3.5744e-172
TAPT1-AS1	2.44028e-176	0.567386	0.316	0.004	8.87871e-172
FAM214A	1.01497e-175	0.540777	0.299	0.003	3.69287e-171
BICRAL	1.21629e-173	0.552345	0.308	0.003	4.42536e-169
CHM	1.59222e-172	0.518678	0.316	0.004	5.79314e-168
PGK1	1.73528e-172	0.445806	0.256	0.001	6.31364e-168
COL4A5	9.53036e-172	0.61589	0.325	0.005	3.46753e-167
ATP5F1D	1.68784e-170	0.42166	0.231	0	6.14103e-166
GAB3	2.00421e-170	0.525875	0.308	0.004	7.29213e-166
LINC01608	7.88766e-169	0.666581	0.325	0.005	2.86985e-164
45175	1.05138e-168	0.471077	0.265	0.002	3.82533e-164
CHIC1	1.08207e-168	0.490128	0.265	0.002	3.937e-164
REPS2	1.28595e-168	0.473531	0.265	0.002	4.6788e-164
BRWD3	7.02038e-168	0.50277	0.299	0.003	2.5543e-163
APOO	1.13956e-167	0.520787	0.299	0.003	4.14619e-163
POLA1	2.95036e-167	0.489871	0.282	0.003	1.07346e-162
MED14	4.42209e-166	0.447014	0.248	0.001	1.60893e-161
PRKX	4.42209e-166	0.400799	0.248	0.001	1.60893e-161
AC093152.1	8.96034e-166	0.564457	0.274	0.002	3.26013e-161
GPR34	1.08077e-165	0.509214	0.291	0.003	3.93228e-161
AFDN	1.46486e-165	0.53602	0.291	0.003	5.32976e-161
SNHG25	4.11442e-164	0.417424	0.214	0	1.49699e-159
AC012368.1	1.42229e-162	0.491634	0.256	0.002	5.17486e-158
AC027644.4	1.8585e-160	0.537653	0.299	0.004	6.76198e-156
STAB1	2.92003e-160	0.848656	0.47	0.018	1.06242e-155
AL365273.2	2.71239e-159	0.494819	0.265	0.002	9.86876e-155
TMEM161B-AS1	5.0922e-159	0.646719	0.333	0.006	1.85275e-154
RFX3-AS1	1.95615e-157	0.542135	0.274	0.003	7.11727e-153
AC087564.1	5.93046e-156	0.598675	0.316	0.005	2.15774e-151
AC006059.1	1.79056e-153	0.513403	0.274	0.003	6.51477e-149
MACO1	2.91302e-153	0.451693	0.256	0.002	1.05987e-148
LINC01184	2.53125e-151	0.507632	0.291	0.004	9.2097e-147
ATP5MC2	3.19466e-151	0.434758	0.265	0.003	1.16235e-146
AC124312.1	4.41456e-151	0.470288	0.265	0.003	1.60619e-146
MT-ND4L	4.47203e-151	0.546834	0.265	0.003	1.6271e-146
MINDY2	8.57283e-151	0.489353	0.291	0.004	3.11914e-146
AL034397.3	1.20447e-149	0.424433	0.239	0.002	4.38234e-145
RPS4X	1.44714e-149	0.432973	0.239	0.002	5.26526e-145
LINC01141	3.78834e-149	0.477935	0.256	0.003	1.37835e-144
MEF2C-AS1	4.56321e-149	0.735318	0.342	0.008	1.66028e-144
GK	3.35353e-148	0.43171	0.231	0.001	1.22015e-143
EDA	1.59778e-147	0.60736	0.316	0.006	5.81337e-143
FAM222B	2.77026e-145	0.503766	0.282	0.004	1.00793e-140
AC009063.2	4.63863e-145	0.440669	0.239	0.002	1.68772e-140
MTREX	5.32681e-145	0.430099	0.256	0.003	1.93811e-140
CSF2RA	6.26371e-145	0.587109	0.325	0.007	2.27899e-140
AL078590.3	8.81812e-144	0.487931	0.265	0.003	3.20839e-139
LARGE1	1.81125e-142	0.48489	0.274	0.004	6.59005e-138
NORAD	8.95696e-142	0.445982	0.222	0.001	3.2589e-137
VPS35L	9.48035e-142	0.51974	0.291	0.005	3.44933e-137
ARMH4	2.27421e-141	0.499449	0.256	0.003	8.27447e-137
RBMX	3.74984e-141	0.465833	0.256	0.003	1.36434e-136
C1QC	1.97579e-140	0.942429	0.547	0.033	7.18872e-136
ATP5F1E	2.98805e-139	0.411193	0.205	0.001	1.08717e-134
ATP6AP1	2.27375e-138	0.362968	0.197	0.001	8.27282e-134
CA5B	2.46075e-138	0.380545	0.197	0.001	8.95321e-134
AL359915.2	5.02456e-138	0.337827	0.179	0	1.82813e-133
LINC00862	5.40464e-138	0.380213	0.188	0	1.96643e-133
THUMPD3-AS1	4.90024e-137	0.389491	0.222	0.002	1.7829e-132
ELMO1-AS1	5.10917e-137	0.380071	0.222	0.002	1.85892e-132
LINC00320	9.21076e-137	0.435211	0.239	0.003	3.35124e-132
WDR44	1.46732e-136	0.409485	0.239	0.003	5.33869e-132
CARMIL1	3.03147e-136	0.524691	0.274	0.005	1.10297e-131
XIAP	2.00039e-135	0.353344	0.214	0.001	7.27821e-131
DDX3X	2.06817e-134	0.419412	0.231	0.002	7.52484e-130
DCAF1	5.99343e-134	0.372765	0.205	0.001	2.18065e-129
PPP4R3A	5.62493e-133	0.467309	0.239	0.003	2.04657e-128
TTN-AS1	6.37952e-133	0.47723	0.239	0.003	2.32113e-128
AL162414.1	7.97051e-133	0.411276	0.197	0.001	2.89999e-128
AC096564.1	1.09635e-132	0.332739	0.197	0.001	3.98897e-128
AL159163.1	1.25888e-132	0.405833	0.222	0.002	4.58033e-128
SELENOF	1.34667e-132	0.405706	0.222	0.002	4.89973e-128
UTY	1.41584e-132	0.626585	0.316	0.008	5.15139e-128
UBA6-AS1	6.81e-131	0.435914	0.214	0.002	2.47775e-126
CTPS2	1.07413e-130	0.374596	0.214	0.002	3.90812e-126
LINC01170	2.83031e-128	0.514145	0.248	0.004	1.02978e-123
OTULINL	3.14643e-128	0.453279	0.248	0.004	1.1448e-123
KANTR	4.02793e-128	0.435456	0.248	0.004	1.46552e-123
GRIPAP1	1.33174e-127	0.380621	0.197	0.001	4.8454e-123
AC104596.1	1.35133e-127	0.350451	0.197	0.001	4.91668e-123
AC006148.1	1.45369e-127	0.399723	0.197	0.001	5.28912e-123
SMARCA1	1.57824e-126	0.438944	0.214	0.002	5.74227e-122
LINC01001	2.14107e-126	0.347086	0.188	0.001	7.79006e-122
AC011933.4	2.85236e-126	0.306008	0.188	0.001	1.0378e-121
LINC01736	1.702e-125	0.365933	0.179	0.001	6.19254e-121
AL512625.3	5.26764e-125	0.342508	0.171	0	1.91658e-120
AL133523.1	5.31469e-125	0.366718	0.162	0	1.9337e-120
AC012593.1	8.03299e-125	0.541168	0.256	0.005	2.92272e-120
SELENOO	1.73018e-124	0.371227	0.205	0.002	6.2951e-120
TBL1X	2.27056e-124	0.362989	0.222	0.003	8.26121e-120
SELENOT	3.8973e-122	0.329429	0.214	0.002	1.41799e-117
AC098850.3	4.10419e-122	0.390422	0.214	0.002	1.49327e-117
NLGN4Y	6.92873e-122	0.497241	0.256	0.005	2.52095e-117
ATP5F1C	2.74404e-121	0.310519	0.188	0.001	9.98391e-117
BMT2	9.02175e-121	0.394249	0.222	0.003	3.28248e-116
AC025159.1	3.2392e-120	0.390861	0.205	0.002	1.17855e-115
AC090517.4	3.32606e-120	0.388295	0.205	0.002	1.21015e-115
DHRSX	3.1971e-119	0.420947	0.239	0.004	1.16323e-114
LINC01505	3.6217e-119	0.499114	0.239	0.004	1.31772e-114
BST2	4.31084e-119	0.455766	0.248	0.005	1.56846e-114
LINC00578	4.98953e-119	0.349726	0.171	0.001	1.81539e-114
WAS	5.39449e-119	0.308588	0.171	0.001	1.96273e-114
KCNMB2-AS1	6.01715e-119	0.299065	0.171	0.001	2.18928e-114
LURAP1L-AS1	6.71152e-119	0.360117	0.171	0.001	2.44192e-114
BDNF-AS	1.71038e-118	0.291395	0.154	0	6.22305e-114
LINC00854	1.71038e-118	0.286369	0.154	0	6.22305e-114
SMS	2.8062e-118	0.342983	0.197	0.002	1.02101e-113
AC091948.1	2.84452e-118	0.384404	0.197	0.002	1.03495e-113
AF117829.1	3.7817e-118	0.350592	0.197	0.002	1.37593e-113
GRK2	1.86872e-117	0.445989	0.222	0.003	6.79914e-113
SPART	3.78714e-117	0.359504	0.222	0.003	1.37791e-112
SELENOP	4.69699e-117	0.381617	0.222	0.003	1.70895e-112
LINC00609	1.0122e-116	0.495408	0.265	0.006	3.68281e-112
AC106791.1	1.81866e-116	0.375901	0.205	0.002	6.61702e-112
ABCB7	1.86548e-116	0.357122	0.188	0.001	6.78737e-112
SEMA6A-AS1	3.82297e-116	0.376277	0.205	0.002	1.39095e-111
BTK	8.41386e-115	0.292621	0.179	0.001	3.0613e-110
AC007566.1	8.79218e-115	0.400995	0.214	0.003	3.19895e-110
CEP128	9.11914e-115	0.450048	0.214	0.003	3.31791e-110
AC027097.2	9.99856e-115	0.327256	0.179	0.001	3.63788e-110
MTM1	4.09633e-114	0.365861	0.197	0.002	1.49041e-109
LINC01004	4.1295e-114	0.410731	0.222	0.003	1.50248e-109
DPH6-DT	5.536e-114	0.366701	0.197	0.002	2.01422e-109
AC097376.2	8.14861e-114	0.463591	0.231	0.004	2.96479e-109
GABPB1-AS1	3.12426e-113	0.425049	0.239	0.005	1.13673e-108
REX1BD	1.67636e-112	0.275163	0.162	0.001	6.09926e-108
SHLD2	2.6514e-112	0.385313	0.205	0.003	9.64686e-108
UBA1	4.43562e-112	0.385744	0.188	0.002	1.61386e-107
BCAP31	4.68043e-112	0.364107	0.188	0.002	1.70293e-107
AC106869.1	5.46699e-112	0.262133	0.145	0	1.98911e-107
MCUB	5.98905e-112	0.284375	0.154	0	2.17906e-107
AC139887.2	2.29403e-111	0.380769	0.214	0.003	8.3466e-107
KLHL4	9.40498e-111	0.455354	0.231	0.004	3.42191e-106
ABHD15-AS1	1.16833e-110	0.441563	0.239	0.005	4.25087e-106
ZMAT1	1.5209e-110	0.421267	0.239	0.005	5.53365e-106
MOSMO	2.73212e-110	0.391962	0.197	0.002	9.94054e-106
AC004918.1	3.1974e-110	0.319088	0.179	0.001	1.16334e-105
PIP4K2B	3.42609e-110	0.339319	0.179	0.001	1.24655e-105
MT-ND5	6.98234e-109	0.454828	0.256	0.006	2.54045e-104
C5orf17	1.45542e-108	0.371206	0.171	0.001	5.29539e-104
LINC01630	3.81774e-108	0.443608	0.222	0.004	1.38905e-103
FAM13A-AS1	3.8571e-107	0.321486	0.162	0.001	1.40337e-102
GPAT4	3.97296e-107	0.283407	0.162	0.001	1.44552e-102
NCK1-DT	3.97296e-107	0.306336	0.162	0.001	1.44552e-102
HLA-DRB5	1.73751e-106	0.396215	0.197	0.003	6.32176e-102
MOSPD2	3.30895e-106	0.31005	0.154	0.001	1.20393e-101
ATP5F1B	4.5063e-106	0.272481	0.154	0.001	1.63957e-101
ATP5MG	1.73591e-105	0.271825	0.137	0	6.31593e-101
AC009690.1	8.16906e-105	0.356964	0.222	0.004	2.97223e-100
AC008957.2	4.48466e-104	0.332515	0.188	0.002	1.6317e-99
DGLUCY	4.92544e-104	0.350016	0.188	0.002	1.79207e-99
CD99	5.94086e-104	0.333958	0.188	0.002	2.16152e-99
CEP83	6.31183e-104	0.359692	0.171	0.001	2.2965e-99
KRBOX4	2.94909e-102	0.305934	0.162	0.001	1.073e-97
GUCY1A1	3.44516e-102	0.328329	0.162	0.001	1.25349e-97
AC079015.1	3.8561e-102	0.388737	0.222	0.005	1.403e-97
MIRLET7BHG	1.03968e-101	0.295239	0.179	0.002	3.78279e-97
ENTPD3-AS1	8.31103e-101	0.284246	0.154	0.001	3.02389e-96
USP11	8.68529e-101	0.289818	0.154	0.001	3.16006e-96
AC096711.2	9.21059e-101	0.311668	0.154	0.001	3.35118e-96
TENT4B	9.82303e-101	0.354009	0.188	0.003	3.57401e-96
DUBR	8.40846e-100	0.377771	0.197	0.003	3.05933e-95
ITGB2	8.42598e-100	0.718745	0.453	0.033	3.06571e-95
MECP2	9.54237e-100	0.360748	0.197	0.003	3.47189e-95
AC079447.1	9.75479e-100	0.335354	0.171	0.002	3.54918e-95
MTRNR2L12	1.01468e-99	0.371526	0.171	0.002	3.69181e-95
CDKL5	1.11237e-99	0.31616	0.171	0.002	4.04725e-95
MRE11	1.30216e-99	0.317302	0.171	0.002	4.73779e-95
RETREG3	1.31937e-99	0.292324	0.171	0.002	4.80038e-95
AC108062.1	5.47679e-99	0.255138	0.128	0	1.99268e-94
PCSK1N	5.47679e-99	0.236824	0.128	0	1.99268e-94
RBM41	6.54897e-98	0.290665	0.179	0.002	2.38278e-93
AC244453.3	7.92913e-98	0.318899	0.162	0.001	2.88493e-93
OPHN1	3.83937e-97	0.38516	0.188	0.003	1.39692e-92
AL139260.1	4.26532e-97	0.331974	0.188	0.003	1.55189e-92
AC109927.1	4.61717e-96	0.329738	0.154	0.001	1.67991e-91
HPN-AS1	6.37049e-96	0.264077	0.154	0.001	2.31784e-91
LINC02328	6.64354e-96	0.322597	0.154	0.001	2.41719e-91
OLMALINC	8.06225e-96	0.321597	0.171	0.002	2.93337e-91
TAZ	1.70317e-94	0.260299	0.145	0.001	6.19681e-90
RRAGB	2.0282e-94	0.2708	0.145	0.001	7.37939e-90
SHLD1	5.09377e-94	0.380382	0.188	0.003	1.85332e-89
CPB2-AS1	5.76943e-94	0.351229	0.188	0.003	2.09915e-89
ARMCX4	6.60884e-94	0.346118	0.188	0.003	2.40456e-89
AL592183.1	7.43826e-94	0.343801	0.205	0.004	2.70634e-89
AC053527.1	8.28453e-94	0.367645	0.197	0.004	3.01424e-89
LNPK	1.58442e-93	0.276602	0.162	0.002	5.76475e-89
PAXX	3.13477e-93	0.283811	0.137	0.001	1.14056e-88
AP002884.1	1.50756e-92	0.256876	0.128	0	5.48512e-88
OCRL	1.55688e-92	0.241411	0.128	0	5.66456e-88
AL137145.2	1.71737e-92	0.244049	0.12	0	6.24849e-88
AL139125.1	1.71737e-92	0.247429	0.12	0	6.24849e-88
ATP5MPL	1.71737e-92	0.219391	0.12	0	6.24849e-88
FCGR3A	2.56769e-92	0.603193	0.333	0.018	9.34227e-88
FCGBP	4.54377e-92	0.752141	0.393	0.027	1.6532e-87
LINC00639	8.87452e-92	0.405173	0.214	0.005	3.22891e-87
TENT4A	1.60608e-91	0.288748	0.154	0.001	5.84358e-87
RAB30-AS1	2.1575e-91	0.331006	0.179	0.003	7.84985e-87
AL158071.4	2.66954e-91	0.330265	0.179	0.003	9.71284e-87
LINC00513	2.87687e-91	0.309679	0.179	0.003	1.04672e-86
LINC00882	3.04721e-91	0.338086	0.179	0.003	1.1087e-86
CPLANE1	3.59113e-91	0.382701	0.197	0.004	1.3066e-86
ALOX12-AS1	3.87967e-91	0.320688	0.179	0.003	1.41158e-86
FP700111.1	6.5004e-91	0.31404	0.188	0.003	2.36511e-86
UPF3B	1.08683e-89	0.247746	0.145	0.001	3.95432e-85
LINC02241	1.10197e-89	0.276724	0.145	0.001	4.00941e-85
SMC1A	1.23094e-89	0.246251	0.145	0.001	4.47865e-85
ATP6AP2	1.51325e-89	0.280757	0.162	0.002	5.50582e-85
EIF1AX	1.07699e-88	0.291894	0.171	0.003	3.91852e-84
PHF6	4.22461e-88	0.250272	0.137	0.001	1.53708e-83
HIKESHI	4.28593e-88	0.228849	0.137	0.001	1.55939e-83
VPS26C	5.02198e-88	0.231857	0.137	0.001	1.8272e-83
CD163	1.40432e-87	0.648845	0.316	0.017	5.10949e-83
STMP1	3.05301e-87	0.23702	0.154	0.002	1.11081e-82
RTF2	7.70816e-87	0.230221	0.128	0.001	2.80454e-82
PTPA	7.9448e-87	0.238997	0.128	0.001	2.89064e-82
ARMH1	8.83159e-87	0.250262	0.128	0.001	3.21329e-82
USP9Y	1.17427e-86	0.387385	0.205	0.005	4.27245e-82
LINC00278	2.93574e-86	0.429578	0.222	0.007	1.06814e-81
MS4A6A	3.81367e-86	0.774533	0.47	0.042	1.38757e-81
SNHG9	4.12689e-86	0.286163	0.12	0	1.50153e-81
KMT2E-AS1	4.26128e-86	0.234217	0.12	0	1.55042e-81
FAM50A	4.40003e-86	0.236867	0.12	0	1.60091e-81
FAM122B	4.47109e-86	0.203185	0.12	0	1.62676e-81
AC004687.1	4.6912e-86	0.257536	0.12	0	1.70685e-81
AC009948.1	5.35409e-86	0.209506	0.111	0	1.94803e-81
AL078639.1	5.35409e-86	0.243154	0.111	0	1.94803e-81
FIRRE	5.35409e-86	0.213715	0.111	0	1.94803e-81
UFD1	5.35409e-86	0.210585	0.111	0	1.94803e-81
AC078881.1	9.72256e-86	0.347452	0.171	0.003	3.53746e-81
SLC16A1-AS1	9.96425e-86	0.371299	0.188	0.004	3.62539e-81
MORF4L2	1.26155e-85	0.315679	0.171	0.003	4.59001e-81
OTUD5	2.28172e-85	0.276939	0.145	0.001	8.30182e-81
TMEM267	2.74418e-85	0.224742	0.145	0.001	9.98441e-81
AC010894.3	8.2287e-84	0.277206	0.154	0.002	2.99393e-79
AL513327.1	1.03862e-83	0.254588	0.154	0.002	3.7789e-79
BCLAF3	1.05142e-83	0.259806	0.154	0.002	3.82548e-79
RPLP1	1.14931e-83	0.619657	0.342	0.021	4.18165e-79
MCRIP1	1.87176e-83	0.26425	0.137	0.001	6.8102e-79
OTUD6B-AS1	1.89751e-83	0.260115	0.137	0.001	6.90389e-79
FGD5-AS1	2.70659e-83	0.2292	0.137	0.001	9.84766e-79
AL354809.1	6.76897e-83	0.307485	0.162	0.003	2.46282e-78
XACT	1.40462e-82	0.46484	0.171	0.003	5.11056e-78
TRIR	9.96751e-82	0.207768	0.128	0.001	3.62658e-77
SLC6A8	1.01106e-81	0.235156	0.128	0.001	3.67863e-77
LINC01135	1.02556e-81	0.212324	0.128	0.001	3.73142e-77
AP002336.2	1.13311e-81	0.219687	0.128	0.001	4.12271e-77
AC004158.1	1.60708e-81	0.273763	0.145	0.002	5.84721e-77
TMEM94	1.86931e-81	0.261988	0.145	0.002	6.80128e-77
HDHD5	2.6928e-81	0.216139	0.145	0.002	9.79747e-77
LINC00844	1.89395e-80	0.253607	0.12	0.001	6.89095e-76
AKAP17A	1.95158e-80	0.215105	0.12	0.001	7.10064e-76
SLC25A6	2.01096e-80	0.23184	0.12	0.001	7.31669e-76
TBC1D8B	2.16742e-80	0.200192	0.12	0.001	7.88593e-76
AC007364.1	2.20014e-80	0.249247	0.12	0.001	8.00497e-76
LINC01480	2.26706e-80	0.247155	0.12	0.001	8.24846e-76
GPR65	2.38768e-80	0.364106	0.205	0.006	8.68733e-76
LIPE-AS1	2.45061e-80	0.300164	0.154	0.002	8.91632e-76
KCNQ1OT1	4.35605e-80	0.329636	0.179	0.004	1.58491e-75
AC008014.1	1.20642e-79	0.340402	0.171	0.003	4.38942e-75
AC044781.1	1.38791e-79	0.282634	0.162	0.003	5.04977e-75
AC007388.1	1.66022e-79	0.234888	0.103	0	6.04055e-75
AC068992.1	1.66022e-79	0.306944	0.103	0	6.04055e-75
AL117336.3	1.66022e-79	0.201785	0.103	0	6.04055e-75
BX255925.3	1.66022e-79	0.204164	0.103	0	6.04055e-75
CDK16	1.66022e-79	0.203608	0.103	0	6.04055e-75
CYREN	2.43172e-79	0.279359	0.137	0.001	8.84758e-75
CLCN5	2.84216e-79	0.290084	0.137	0.001	1.03409e-74
EIF2S3	3.40908e-79	0.222551	0.137	0.001	1.24036e-74
AC005261.1	3.59084e-79	0.241297	0.137	0.001	1.30649e-74
RIPOR1	3.59085e-79	0.210451	0.137	0.001	1.30649e-74
SMIM35	3.59085e-79	0.271909	0.137	0.001	1.30649e-74
MARF1	5.96036e-78	0.281988	0.145	0.002	2.16862e-73
PVT1	7.58505e-78	0.285882	0.145	0.002	2.75974e-73
PIM1	9.88621e-78	0.275727	0.145	0.002	3.597e-73
CASTOR3	1.41047e-77	0.302391	0.179	0.004	5.13187e-73
ZRSR2	2.5255e-77	0.272248	0.128	0.001	9.18877e-73
RLIM	2.59453e-77	0.253368	0.128	0.001	9.43995e-73
KHDC4	2.70164e-77	0.235577	0.128	0.001	9.82963e-73
MBTPS2	2.77547e-77	0.250028	0.128	0.001	1.00983e-72
OFD1	3.00928e-77	0.242885	0.128	0.001	1.0949e-72
ADA2	3.21906e-77	0.27808	0.128	0.001	1.17122e-72
MIR222HG	3.40422e-77	0.326661	0.154	0.003	1.23859e-72
AC034195.1	3.64334e-77	0.329407	0.154	0.003	1.32559e-72
NNT-AS1	4.04752e-77	0.209527	0.128	0.001	1.47265e-72
NIPSNAP2	4.31698e-77	0.252655	0.154	0.003	1.57069e-72
ODR4	4.36607e-77	0.280678	0.154	0.003	1.58855e-72
AC012358.3	4.46593e-77	0.265954	0.154	0.003	1.62489e-72
ZDHHC9	4.94424e-77	0.22828	0.154	0.003	1.79891e-72
LRRC8C-DT	1.56975e-75	0.261906	0.137	0.002	5.71138e-71
AC114763.1	1.82339e-75	0.220978	0.12	0.001	6.63423e-71
C21orf62-AS1	1.84924e-75	0.204112	0.12	0.001	6.72828e-71
AC104123.1	2.03597e-75	0.272799	0.137	0.002	7.40768e-71
PIN4	2.0407e-75	0.229304	0.12	0.001	7.4249e-71
DELE1	2.30421e-75	0.223524	0.137	0.002	8.38365e-71
RMC1	2.57562e-75	0.237745	0.137	0.002	9.37114e-71
TSC22D3	1.54707e-74	0.298249	0.145	0.002	5.62885e-70
AP003481.1	3.18272e-74	0.402095	0.188	0.005	1.158e-69
MID1IP1	4.0464e-74	0.212453	0.111	0.001	1.47224e-69
NUP50-DT	4.36006e-74	0.249519	0.154	0.003	1.58637e-69
ABRAXAS2	4.48943e-74	0.22147	0.111	0.001	1.63343e-69
C1QA	1.4438e-73	0.760966	0.427	0.042	5.25311e-69
C1QB	3.26897e-73	0.890896	0.564	0.078	1.18938e-68
WDR13	3.57974e-73	0.229969	0.103	0	1.30245e-68
FBH1	3.63539e-73	0.253174	0.128	0.001	1.3227e-68
RBM10	3.92509e-73	0.241421	0.128	0.001	1.42811e-68
BVES-AS1	3.99935e-73	0.219944	0.103	0	1.45512e-68
KDM5D	4.34747e-73	0.230756	0.128	0.001	1.58178e-68
AC110285.1	5.25677e-72	0.281104	0.137	0.002	1.91262e-67
AP1S2	6.20303e-72	0.273983	0.137	0.002	2.25691e-67
HPRT1	6.35141e-72	0.261772	0.137	0.002	2.3109e-67
LINC00461	6.89917e-72	0.233429	0.137	0.002	2.51019e-67
MMP24OS	9.06114e-72	0.297152	0.162	0.004	3.29681e-67
VIRMA	2.33358e-71	0.273711	0.154	0.003	8.4905e-67
PDK3	2.42113e-71	0.272412	0.145	0.003	8.80905e-67
AC104806.2	4.02068e-71	0.255429	0.12	0.001	1.46289e-66
RTRAF	4.47109e-71	0.200779	0.12	0.001	1.62676e-66
MYDGF	4.59134e-71	0.244814	0.12	0.001	1.67051e-66
LINC01268	5.03817e-71	0.215474	0.12	0.001	1.83309e-66
LINC02062	5.17362e-71	0.228243	0.12	0.001	1.88237e-66
LINC00667	5.4555e-71	0.210207	0.12	0.001	1.98493e-66
JAK3	3.35045e-70	0.498152	0.291	0.018	1.21903e-65
AC008691.1	6.22383e-70	0.472511	0.197	0.007	2.26448e-65
HCG17	1.60846e-69	0.259263	0.128	0.002	5.85221e-65
MAGED1	1.75126e-69	0.259002	0.128	0.002	6.37178e-65
AF165147.1	1.86093e-69	0.236038	0.128	0.002	6.77082e-65
TMEM164	2.12691e-69	0.251691	0.128	0.002	7.73855e-65
TMLHE	2.22677e-69	0.299461	0.162	0.004	8.10187e-65
AC025682.1	2.80784e-69	0.207392	0.111	0.001	1.0216e-64
WWC3	3.36327e-69	0.213642	0.111	0.001	1.22369e-64
APOOL	3.45794e-69	0.21143	0.111	0.001	1.25814e-64
ZUP1	3.91792e-69	0.209596	0.111	0.001	1.4255e-64
HIF1A-AS2	7.129e-69	0.325908	0.154	0.003	2.59382e-64
KYAT3	1.40624e-68	0.215246	0.137	0.002	5.11648e-64
SPIN3	1.05085e-67	0.218664	0.103	0.001	3.82342e-63
BRCC3	1.08214e-67	0.207726	0.103	0.001	3.93726e-63
AL445250.1	1.14753e-67	0.205504	0.103	0.001	4.17516e-63
ATP5IF1	3.78514e-67	0.241292	0.12	0.001	1.37719e-62
LINC01122	4.51188e-67	0.255423	0.12	0.001	1.6416e-62
AFG1L	4.68486e-67	0.229093	0.12	0.001	1.70454e-62
AC104986.2	4.74397e-67	0.216692	0.12	0.001	1.72605e-62
MINDY3	4.98797e-67	0.201925	0.12	0.001	1.81482e-62
MAF	6.51498e-67	0.767673	0.496	0.063	2.37041e-62
TLR7	4.53668e-66	0.231002	0.128	0.002	1.65063e-61
C10orf11	7.40116e-66	-1.96438	0	0.93	2.69284e-61
LINC01411	5.32156e-65	0.231281	0.111	0.001	1.9362e-60
PHF8	5.83026e-65	0.222609	0.111	0.001	2.12128e-60
CD14	3.24331e-63	0.751147	0.41	0.046	1.18005e-58
TXNIP	3.54858e-63	0.753044	0.487	0.064	1.29112e-58
AC233296.1	4.44971e-63	0.279385	0.128	0.002	1.61898e-58
SNHG8	5.30772e-63	0.204319	0.103	0.001	1.93116e-58
TENT5A	5.60585e-63	0.223227	0.103	0.001	2.03963e-58
STX18-AS1	5.86514e-63	0.227591	0.128	0.002	2.13397e-58
CATSPERE	6.25305e-63	0.207352	0.103	0.001	2.27511e-58
LINC00662	6.25305e-63	0.201946	0.103	0.001	2.27511e-58
AC090579.1	6.47784e-63	0.229624	0.128	0.002	2.3569e-58
UGDH-AS1	6.55514e-63	0.229157	0.137	0.003	2.38502e-58
HLA-DRB1	3.84256e-62	0.621915	0.35	0.033	1.39808e-57
AC009093.2	3.37748e-61	0.202141	0.111	0.001	1.22886e-56
C22orf34	3.42799e-61	0.301843	0.145	0.004	1.24724e-56
AL591895.1	4.37179e-61	0.202431	0.111	0.001	1.59063e-56
HLA-A	1.22732e-60	0.551842	0.359	0.035	4.46549e-56
AC016597.1	2.74971e-60	0.202917	0.12	0.002	1.00046e-55
AC090630.1	2.8518e-60	0.300451	0.128	0.003	1.0376e-55
LINC01266	3.48573e-60	0.210021	0.12	0.002	1.26825e-55
ZNF75D	3.79338e-60	0.232754	0.128	0.003	1.38018e-55
RPS19	1.18801e-59	0.784607	0.538	0.083	4.32246e-55
ZNF630	7.29335e-59	0.207999	0.103	0.001	2.65361e-54
HDX	7.6758e-59	0.209391	0.103	0.001	2.79276e-54
COQ8A	7.77449e-59	0.201447	0.103	0.001	2.82867e-54
CKMT2-AS1	9.04164e-58	0.205698	0.111	0.002	3.28971e-53
CEBPA	9.50833e-58	0.299485	0.162	0.006	3.45951e-53
SLC8A1-AS1	1.22285e-57	0.207002	0.111	0.002	4.44921e-53
HDGFL3	2.01214e-57	0.224555	0.12	0.002	7.32097e-53
KNOP1	2.16967e-57	0.242501	0.12	0.002	7.89411e-53
KIF9-AS1	2.28965e-57	0.219484	0.12	0.002	8.33065e-53
RPL3	1.02677e-56	0.469879	0.222	0.013	3.7358e-52
LINC01376	3.11511e-55	0.206284	0.103	0.001	1.1334e-50
ARHGEF9	3.13947e-55	0.218758	0.128	0.003	1.14227e-50
AC008050.1	3.39319e-55	0.270314	0.128	0.003	1.23458e-50
RPL18	7.84423e-55	0.49201	0.274	0.022	2.85405e-50
NIFK-AS1	1.13625e-54	0.228334	0.111	0.002	4.13413e-50
TTTY14	6.247e-54	0.269409	0.137	0.004	2.27291e-49
HLA-DRA	7.02331e-53	0.71116	0.453	0.067	2.55536e-48
AC008591.1	5.88797e-52	0.247764	0.103	0.002	2.14228e-47
AC092683.1	8.37556e-52	0.214374	0.111	0.002	3.04736e-47
DLG2	1.45948e-51	-0.407983	0.915	0.988	5.31017e-47
ZFP36L1	4.29587e-51	0.900576	0.65	0.147	1.56301e-46
PCDH9	1.44494e-50	-0.352725	0.983	0.999	5.25726e-46
GRIA3	2.48533e-49	0.214725	0.111	0.003	9.04264e-45
LAIR1	4.47502e-49	0.509115	0.35	0.041	1.62819e-44
AL589740.1	5.27708e-49	0.220794	0.103	0.002	1.92001e-44
C3	8.10063e-49	0.894306	0.778	0.22	2.94733e-44
RPL7A	8.40441e-49	0.405447	0.231	0.017	3.05786e-44
APOC1	8.89778e-49	0.490944	0.239	0.019	3.23737e-44
APOE	1.1438e-48	0.997148	0.726	0.222	4.16162e-44
TMEM173	1.93042e-48	0.210577	0.145	0.006	7.02365e-44
CORO1A	2.22623e-48	0.430572	0.299	0.03	8.09992e-44
RPS28	3.77858e-48	0.374214	0.205	0.014	1.3748e-43
TMEM176B	4.99474e-48	0.36192	0.222	0.016	1.81729e-43
CYBA	6.04141e-48	0.679025	0.453	0.072	2.19811e-43
IFI16	2.16859e-47	0.815984	0.641	0.149	7.89018e-43
AC090502.1	2.45965e-47	0.239898	0.128	0.004	8.9492e-43
PPP2R2B	4.35075e-47	-0.594146	0.812	0.986	1.58298e-42
LGALS9	4.49386e-47	0.520668	0.342	0.041	1.63504e-42
FES	5.91003e-47	0.227259	0.145	0.006	2.1503e-42
RPL8	7.30103e-47	0.514142	0.342	0.041	2.65641e-42
FRG1-DT	1.91735e-46	0.203061	0.103	0.002	6.9761e-42
FAM129A	2.33162e-46	0.585257	0.359	0.046	8.48338e-42
LPAR6	3.00205e-46	0.764566	0.521	0.101	1.09227e-41
RBFOX1	1.7149e-45	-1.28021	0.179	0.848	6.2395e-41
NPC2	1.98331e-45	0.451448	0.308	0.034	7.21606e-41
HSPA1B	4.59359e-45	0.542593	0.299	0.033	1.67133e-40
CD300A	2.13388e-44	0.43373	0.299	0.033	7.76391e-40
AZIN1-AS1	3.47701e-44	0.225711	0.12	0.004	1.26507e-39
TREM2	6.70707e-44	0.323424	0.222	0.018	2.4403e-39
UBA52	7.68046e-44	0.545629	0.359	0.049	2.79446e-39
CD68	9.48643e-44	0.317812	0.171	0.01	3.45154e-39
RPS15	1.19727e-43	0.561325	0.385	0.055	4.35614e-39
IRF8	8.45719e-43	0.463005	0.274	0.029	3.07706e-38
LRP1B	1.575e-42	-0.974625	0.402	0.891	5.73049e-38
AIF1	1.63058e-42	0.321696	0.188	0.013	5.9327e-38
HCST	4.4827e-42	0.261386	0.145	0.007	1.63098e-37
KCNIP4	5.82396e-42	-1.03503	0.359	0.87	2.11899e-37
CCND1	2.56252e-41	0.293112	0.145	0.008	9.32348e-37
AC092691.1	4.422e-41	0.219289	0.111	0.004	1.6089e-36
PARP9	7.04724e-41	0.417298	0.274	0.03	2.56407e-36
TMSB10	1.02512e-40	0.742318	0.547	0.119	3.72981e-36
LINGO1	1.0935e-40	0.708614	0.487	0.095	3.97858e-36
RPS14	1.14079e-40	0.458382	0.274	0.031	4.15067e-36
CD81	1.21404e-40	0.763293	0.573	0.137	4.41718e-36
RPL28	1.67813e-40	0.537287	0.308	0.04	6.10569e-36
NINJ1	1.68054e-40	0.367142	0.231	0.021	6.11446e-36
LMO2	1.71128e-40	0.378481	0.239	0.023	6.22632e-36
RPL13	1.76471e-40	0.68195	0.53	0.111	6.42074e-36
RPS24	3.3177e-40	0.552965	0.299	0.038	1.20711e-35
LRRK2	6.28369e-40	0.549581	0.385	0.06	2.28626e-35
ADGRB3	2.63292e-39	-0.753449	0.556	0.911	9.57962e-35
GAS6	2.75009e-39	0.534104	0.342	0.049	1.00059e-34
LILRB1	3.02632e-39	0.314158	0.205	0.017	1.1011e-34
RPL13A	4.05009e-39	0.447845	0.282	0.034	1.47359e-34
ZBTB16	5.49409e-39	-0.863963	0.462	0.873	1.99897e-34
CASP1	1.2717e-38	0.232322	0.128	0.006	4.62696e-34
RASGEF1B	1.35211e-38	0.804949	0.607	0.16	4.91952e-34
S100A11	1.84733e-38	0.378724	0.231	0.023	6.72132e-34
BLNK	2.56127e-38	0.669789	0.487	0.1	9.31893e-34
SAP25	5.3835e-38	0.463691	0.265	0.031	1.95873e-33
NKAIN2	5.94253e-38	-0.689416	0.624	0.942	2.16213e-33
MAGI2	1.66213e-37	-0.424422	0.872	0.977	6.04749e-33
TMEM119	2.46846e-37	0.388973	0.231	0.024	8.98125e-33
FTL	2.86617e-37	0.893109	0.726	0.268	1.04283e-32
CYTH4	4.88291e-37	0.434516	0.316	0.044	1.7766e-32
LAT2	9.85137e-37	0.528833	0.376	0.062	3.58432e-32
PARK2	1.01766e-36	-1.32379	0	0.672	3.70265e-32
MMP14	1.23727e-36	0.216825	0.111	0.005	4.50167e-32
CD4	1.49432e-36	0.462005	0.342	0.051	5.43692e-32
RPS18	1.81596e-36	0.320848	0.145	0.009	6.60719e-32
CTSH	2.18386e-36	0.425937	0.274	0.034	7.94575e-32
TRMT1	9.68354e-36	0.453386	0.265	0.033	3.52326e-31
MGAT4A	1.04371e-35	0.767852	0.838	0.344	3.79743e-31
RP11-654K19.6	9.32562e-35	-1.34363	0	0.65	3.39303e-30
LSAMP	9.48843e-35	-0.782767	0.496	0.914	3.45227e-30
PYCARD	1.41152e-34	0.213557	0.12	0.006	5.13567e-30
TRIM25	1.88473e-34	0.231976	0.145	0.01	6.8574e-30
CTNNA3	2.69076e-34	-0.412845	0.872	0.981	9.79006e-30
FYB1	8.76839e-34	0.775252	0.829	0.349	3.19029e-29
PTPRD	1.09695e-33	-0.42751	0.821	0.953	3.99114e-29
GSDMD	2.32157e-33	0.306437	0.197	0.019	8.4468e-29
C1orf56	5.17378e-33	0.317656	0.205	0.021	1.88243e-28
TRABD	5.24973e-33	0.465214	0.325	0.052	1.91006e-28
FAM155A	8.32639e-33	-1.16516	0.077	0.69	3.02948e-28
CD74	1.0016e-32	0.799458	0.752	0.309	3.64422e-28
CASP4	1.25842e-32	0.300069	0.171	0.015	4.57864e-28
FCER1G	1.29872e-32	0.26137	0.179	0.016	4.72525e-28
CTSC	1.64425e-32	0.534252	0.376	0.069	5.98242e-28
PIK3CD	1.86745e-32	0.408027	0.291	0.042	6.79453e-28
FAU	4.4353e-32	0.45154	0.282	0.041	1.61374e-27
DPP7	7.91837e-32	0.468703	0.359	0.064	2.88102e-27
IL10RA	8.90389e-32	0.454941	0.35	0.061	3.23959e-27
CSMD1	1.04696e-31	-0.967152	0.265	0.752	3.80926e-27
RPL11	1.52374e-31	0.409867	0.239	0.03	5.54398e-27
NRXN1	2.58759e-31	-1.05867	0.171	0.722	9.4147e-27
HLA-B	2.66221e-31	0.452176	0.308	0.049	9.68619e-27
TLR1	4.27429e-31	0.554682	0.427	0.092	1.55516e-26
NRG3	6.37916e-31	-1.05145	0.162	0.727	2.32099e-26
POU2F2	8.66156e-31	0.547953	0.427	0.091	3.15142e-26
CMTM3	1.45235e-30	0.202777	0.12	0.007	5.28424e-26
NCAM2	3.02941e-30	-0.445639	0.829	0.962	1.10222e-25
LRP1	3.28087e-30	0.497136	0.393	0.079	1.19371e-25
CADM2	3.6018e-30	-0.368868	0.915	0.967	1.31048e-25
TCIRG1	6.19329e-30	0.298181	0.171	0.016	2.25337e-25
ACTB	6.54013e-30	0.732214	0.795	0.333	2.37956e-25
ROBO2	7.78657e-30	-1.08803	0.085	0.657	2.83307e-25
RPL27	7.84553e-30	0.286817	0.179	0.018	2.85452e-25
EIF3G	1.17721e-29	0.211931	0.12	0.008	4.28317e-25
HLA-DQB1	1.23014e-29	0.30275	0.179	0.018	4.47575e-25
SPOCK1	1.74238e-29	-0.609208	0.624	0.886	6.33948e-25
HLA-DMB	2.89349e-29	0.391692	0.231	0.031	1.05277e-24
RPSA	2.96435e-29	0.392407	0.265	0.04	1.07855e-24
MAP3K1	8.71377e-29	0.477123	0.376	0.076	3.17042e-24
CTSZ	9.32119e-29	0.317213	0.222	0.028	3.39142e-24
RASAL3	1.22723e-28	0.41767	0.282	0.046	4.46517e-24
IFI44	1.28138e-28	0.351726	0.239	0.033	4.66216e-24
PLA2G15	1.36053e-28	0.325476	0.205	0.025	4.95014e-24
MLXIPL	1.74571e-28	0.508401	0.35	0.069	6.3516e-24
HSPB1	2.45569e-28	0.335931	0.171	0.017	8.93477e-24
SLC2A5	3.06314e-28	0.653781	0.632	0.201	1.11449e-23
RPL35	3.48638e-28	0.461973	0.308	0.054	1.26848e-23
TMEM144	4.83859e-28	-0.655417	0.547	0.863	1.76047e-23
CSF1R	5.03757e-28	0.694501	0.769	0.316	1.83287e-23
REEP4	7.29357e-28	0.209705	0.128	0.01	2.65369e-23
MAFB	9.93055e-28	0.288974	0.145	0.013	3.61313e-23
C1orf162	1.40698e-27	0.348841	0.197	0.024	5.11916e-23
ARHGAP9	1.59229e-27	0.260221	0.145	0.013	5.79337e-23
MS4A4A	1.64042e-27	0.245778	0.162	0.016	5.9685e-23
ANKS1B	2.92799e-27	-0.672566	0.504	0.826	1.06532e-22
RPL36	3.38879e-27	0.317759	0.205	0.026	1.23298e-22
CTSS	3.9687e-27	0.429103	0.325	0.061	1.44397e-22
ST18	6.42923e-27	-0.444755	0.786	0.95	2.33921e-22
GRIK2	6.74296e-27	-1.04896	0.094	0.62	2.45336e-22
CCSER1	1.11684e-26	-1.01388	0.111	0.638	4.06352e-22
CLEC2B	1.11723e-26	0.216391	0.12	0.009	4.06494e-22
MBP	2.39239e-26	-0.360739	0.855	0.969	8.70449e-22
LAPTM5	2.44864e-26	0.633891	0.521	0.15	8.90913e-22
STXBP5L	2.84006e-26	-1.04488	0.077	0.602	1.03333e-21
RPS27	3.23055e-26	0.259042	0.103	0.006	1.1754e-21
FOLR2	5.24475e-26	0.209301	0.12	0.009	1.90825e-21
RPS27A	5.38038e-26	0.429723	0.333	0.065	1.9576e-21
IFI44L	7.84424e-26	0.492416	0.282	0.051	2.85405e-21
ABI3	9.24984e-26	0.297847	0.162	0.017	3.36546e-21
LRMP	1.52752e-25	0.495436	0.427	0.102	5.55772e-21
ANK3	2.94223e-25	-0.468431	0.752	0.931	1.0705e-20
DLGAP1	3.83001e-25	-0.998823	0.085	0.61	1.39351e-20
GRINA	4.23401e-25	0.293564	0.222	0.032	1.5405e-20
ANOS1	4.78029e-25	0.547561	0.359	0.082	1.73926e-20
FAM13A	7.73345e-25	0.646134	0.598	0.21	2.81374e-20
TMC8	1.08865e-24	0.427615	0.265	0.047	3.96094e-20
EHBP1L1	1.48313e-24	0.385615	0.282	0.051	5.39622e-20
HOMER1	2.41314e-24	-1.04828	0.034	0.547	8.77997e-20
MAZ	2.60272e-24	0.29824	0.179	0.022	9.46972e-20
AUP1	2.78855e-24	0.318937	0.179	0.023	1.01458e-19
TAPBP	2.80019e-24	0.362703	0.265	0.046	1.01882e-19
TGFBR1	3.90403e-24	0.664306	0.59	0.217	1.42044e-19
CPED1	4.52986e-24	0.650014	0.684	0.266	1.64814e-19
TNFRSF14	4.79253e-24	0.209624	0.12	0.01	1.74371e-19
NLGN1	7.81336e-24	-0.565617	0.615	0.872	2.84281e-19
TBC1D2B	7.91053e-24	0.425824	0.368	0.083	2.87817e-19
ADCY7	8.09487e-24	0.416312	0.35	0.076	2.94524e-19
PDE1A	9.25271e-24	-0.840442	0.282	0.694	3.36651e-19
NSUN5	9.59994e-24	0.33471	0.197	0.027	3.49284e-19
MGAT1	1.0608e-23	0.432671	0.299	0.06	3.8596e-19
RPS5	1.19299e-23	0.232864	0.137	0.013	4.34058e-19
SCIN	1.30128e-23	0.626272	0.496	0.151	4.73457e-19
CD37	2.29273e-23	0.310837	0.205	0.03	8.34187e-19
PLD4	3.64299e-23	0.353771	0.222	0.035	1.32547e-18
USF2	4.18778e-23	0.376433	0.248	0.043	1.52368e-18
TFEC	4.52232e-23	0.524337	0.427	0.116	1.6454e-18
ACADVL	5.84106e-23	0.341288	0.248	0.043	2.12521e-18
ELOB	5.96613e-23	0.278496	0.171	0.021	2.17072e-18
P2RY11	6.62151e-23	0.206289	0.103	0.008	2.40917e-18
PIK3CG	6.83105e-23	0.246372	0.145	0.016	2.48541e-18
SIK3	8.98278e-23	-0.317681	0.872	0.941	3.26829e-18
JUND	9.23971e-23	0.505269	0.444	0.121	3.36178e-18
NOTCH2	9.73336e-23	0.376659	0.265	0.049	3.54139e-18
SLC44A1	1.1452e-22	-0.381977	0.795	0.93	4.16669e-18
NLRC5	1.57396e-22	0.273863	0.179	0.024	5.72668e-18
SH3BGRL3	1.79914e-22	0.289511	0.205	0.031	6.546e-18
RPS11	1.80686e-22	0.384682	0.256	0.047	6.57409e-18
MAP1S	1.93832e-22	0.287362	0.188	0.026	7.0524e-18
GPSM3	2.4598e-22	0.215184	0.128	0.012	8.94974e-18
ANK2	2.49959e-22	-0.471506	0.701	0.913	9.09452e-18
UBALD2	2.70424e-22	0.245942	0.171	0.022	9.83911e-18
RNF220	3.04103e-22	-0.419899	0.778	0.909	1.10645e-17
RCN3	3.25647e-22	0.262852	0.128	0.013	1.18484e-17
ELMO1	4.28508e-22	-0.20608	0.966	0.98	1.55908e-17
IL15	4.8638e-22	0.240051	0.12	0.011	1.76964e-17
PLCB2	5.40452e-22	0.355139	0.256	0.047	1.96638e-17
HLA-C	5.41359e-22	0.371318	0.248	0.045	1.96968e-17
RPL27A	5.75615e-22	0.347597	0.265	0.05	2.09432e-17
PDE4D	5.91351e-22	-0.784263	0.291	0.723	2.15157e-17
NTM	5.92259e-22	-0.689346	0.444	0.791	2.15487e-17
RPLP2	7.32179e-22	0.332998	0.214	0.034	2.66396e-17
PECAM1	8.76414e-22	0.341403	0.239	0.043	3.18875e-17
DENND3	1.07912e-21	0.625904	0.556	0.201	3.92627e-17
GRN	1.09871e-21	0.340637	0.231	0.04	3.99753e-17
SIRPB2	1.22617e-21	0.277904	0.188	0.027	4.46128e-17
ARHGAP27	1.27667e-21	0.349952	0.265	0.051	4.64505e-17
PTAFR	1.43118e-21	0.267781	0.231	0.039	5.20721e-17
ITGAL	1.78795e-21	0.226239	0.154	0.018	6.50528e-17
IRF5	2.02075e-21	0.270661	0.162	0.021	7.35231e-17
RPS23	2.02804e-21	0.353324	0.248	0.046	7.37884e-17
PTPRC	2.05496e-21	0.594376	0.795	0.391	7.47676e-17
IL4R	2.52385e-21	0.373571	0.291	0.06	9.18277e-17
KCNK13	3.17716e-21	0.448661	0.368	0.092	1.15598e-16
TBC1D8	3.53978e-21	0.431015	0.308	0.069	1.28791e-16
NCF4	3.69806e-21	0.256257	0.145	0.017	1.3455e-16
ZFP36L2	3.81821e-21	0.526295	0.47	0.141	1.38922e-16
PLCL1	5.94552e-21	-0.423573	0.744	0.908	2.16322e-16
PFDN5	6.27316e-21	0.347557	0.239	0.044	2.28243e-16
PHLPP1	7.41178e-21	-0.492754	0.641	0.881	2.6967e-16
OPCML	8.63228e-21	-0.874589	0.12	0.577	3.14077e-16
NFATC2	9.09272e-21	0.557283	0.513	0.173	3.3083e-16
TYROBP	1.22018e-20	0.402442	0.316	0.072	4.4395e-16
RFWD2	1.35262e-20	-0.92549	0	0.46	4.92139e-16
HLA-E	1.39196e-20	0.448796	0.376	0.097	5.06451e-16
RPL19	1.42211e-20	0.410249	0.256	0.051	5.17421e-16
NACA	1.80446e-20	0.342596	0.214	0.037	6.56536e-16
ITPR2	1.86782e-20	0.439601	0.949	0.722	6.79588e-16
C14orf37	2.04237e-20	-0.919877	0	0.457	7.43097e-16
CNTNAP2	2.14505e-20	-0.673311	0.419	0.793	7.80454e-16
TMEM51	2.18439e-20	0.325686	0.231	0.042	7.94769e-16
BMP2K	2.39085e-20	0.539609	0.88	0.55	8.69888e-16
P4HA1	3.13858e-20	0.554741	0.462	0.147	1.14194e-15
LRRTM4	3.42169e-20	-0.875074	0.154	0.597	1.24495e-15
MNDA	3.4248e-20	0.238718	0.162	0.022	1.24608e-15
SORL1	3.64399e-20	0.521034	0.846	0.534	1.32583e-15
LEPR	3.69478e-20	0.344657	0.239	0.045	1.34431e-15
ETV6	4.0747e-20	0.588392	0.761	0.387	1.48254e-15
SYT1	4.49882e-20	-0.748959	0.299	0.7	1.63685e-15
RPS3	4.74688e-20	0.405011	0.299	0.068	1.72711e-15
FCGR1A	5.16627e-20	0.386993	0.274	0.058	1.8797e-15
LENG8	5.78701e-20	0.519324	0.53	0.177	2.10554e-15
BHLHE41	6.35472e-20	0.53516	0.504	0.17	2.3121e-15
NEGR1	6.59423e-20	-0.765591	0.248	0.63	2.39925e-15
PPP1R18	7.00944e-20	0.239596	0.154	0.02	2.55031e-15
SPTLC2	8.12197e-20	-0.527569	0.607	0.819	2.9551e-15
SSH1	8.31248e-20	0.431557	0.393	0.106	3.02441e-15
LRRC7	1.34734e-19	-0.668366	0.385	0.717	4.90215e-15
RNF135	1.35121e-19	0.238687	0.162	0.023	4.91626e-15
SLC16A3	1.3801e-19	0.367009	0.256	0.053	5.02136e-15
LST1	1.39481e-19	0.289989	0.188	0.03	5.07487e-15
LTBR	1.4624e-19	0.202838	0.145	0.018	5.32078e-15
RPS2	1.52877e-19	0.408518	0.299	0.068	5.56229e-15
YPEL3	1.67004e-19	0.448829	0.333	0.085	6.07626e-15
RYR2	1.98517e-19	-0.787253	0.205	0.608	7.22283e-15
ALOX5AP	2.08891e-19	0.316876	0.239	0.046	7.6003e-15
SLC12A9	2.10183e-19	0.32393	0.231	0.044	7.64731e-15
RPL32	2.30869e-19	0.387203	0.274	0.059	8.39994e-15
AKAP6	2.40535e-19	-0.535739	0.538	0.806	8.75161e-15
ABHD3	2.8016e-19	0.401666	0.308	0.073	1.01934e-14
ARHGAP15	3.51417e-19	0.513138	0.855	0.563	1.2786e-14
NBPF14	3.58028e-19	0.207936	0.137	0.016	1.30265e-14
NAIP	3.7694e-19	0.559799	0.735	0.366	1.37146e-14
ERBB4	3.92423e-19	-0.542352	0.581	0.84	1.42779e-14
GRIA2	4.06829e-19	-0.784493	0.205	0.588	1.48021e-14
CLASP2	5.62124e-19	-0.450788	0.658	0.871	2.04523e-14
PPM1E	5.84682e-19	-0.898544	0.051	0.483	2.12731e-14
DOCK5	6.78583e-19	-0.44105	0.684	0.851	2.46896e-14
ANO6	8.2469e-19	0.409703	0.333	0.085	3.00055e-14
EEF1D	8.80919e-19	0.367208	0.299	0.07	3.20513e-14
CXCL16	8.92116e-19	0.295737	0.179	0.029	3.24588e-14
PAPD4	9.19198e-19	-0.871349	0	0.429	3.34441e-14
DOCK3	9.26485e-19	-0.640865	0.393	0.696	3.37092e-14
RPS6KA4	9.44246e-19	0.239407	0.154	0.021	3.43554e-14
FGF14	1.14716e-18	-0.838456	0.111	0.544	4.17382e-14
CCDC88B	1.15097e-18	0.337094	0.222	0.043	4.18767e-14
PNPLA6	1.21534e-18	0.30242	0.205	0.037	4.4219e-14
SH3BP2	1.36889e-18	0.336336	0.248	0.051	4.98055e-14
TMTC2	1.38326e-18	-0.416311	0.726	0.887	5.03286e-14
SNTG1	1.41162e-18	-0.861831	0.06	0.498	5.13605e-14
TPRG1	1.6363e-18	0.385816	0.188	0.032	5.95351e-14
PLEC	1.64044e-18	0.335641	0.239	0.048	5.96858e-14
HDAC9	1.88217e-18	0.533857	0.829	0.562	6.84808e-14
RPL37A	2.01044e-18	0.351479	0.256	0.055	7.31478e-14
LY96	2.83852e-18	0.235341	0.145	0.02	1.03277e-13
HSD17B11	2.99831e-18	0.339707	0.282	0.064	1.09091e-13
MARCKS	3.0022e-18	0.402552	0.35	0.094	1.09232e-13
EFCAB13	3.0506e-18	0.330669	0.231	0.046	1.10993e-13
KIFC2	3.06374e-18	0.282133	0.179	0.029	1.11471e-13
SLC24A2	3.84218e-18	-0.336599	0.821	0.935	1.39794e-13
GRIN1	3.93882e-18	0.383983	0.282	0.065	1.4331e-13
45176	4.40825e-18	-0.444829	0.632	0.822	1.6039e-13
RPS8	4.43186e-18	0.358102	0.239	0.05	1.61249e-13
BIN2	4.54959e-18	0.288694	0.248	0.051	1.65532e-13
TLE3	4.65909e-18	0.263991	0.179	0.029	1.69516e-13
SGK1	5.16623e-18	-0.446594	0.658	0.851	1.87968e-13
MAP7	5.41048e-18	-0.402621	0.709	0.868	1.96855e-13
UTRN	5.69334e-18	0.535793	0.513	0.19	2.07147e-13
UNC5C	6.16642e-18	-0.454353	0.684	0.87	2.24359e-13
PRAM1	6.40235e-18	0.279631	0.265	0.057	2.32943e-13
PLEKHA7	6.89239e-18	0.423878	0.308	0.078	2.50773e-13
NRXN3	7.10989e-18	-0.486531	0.65	0.876	2.58686e-13
ZNF217	8.24819e-18	0.313543	0.231	0.047	3.00102e-13
CSK	9.29942e-18	0.247797	0.179	0.03	3.3835e-13
PLEK	1.22336e-17	0.266302	0.231	0.046	4.45108e-13
RPS6	1.6162e-17	0.313589	0.231	0.047	5.88037e-13
KCTD12	2.05011e-17	0.404001	0.342	0.095	7.45912e-13
UBXN1	2.09635e-17	0.213177	0.128	0.016	7.62737e-13
RPLP0	2.16364e-17	0.280831	0.248	0.053	7.87219e-13
MLLT4	2.19119e-17	-0.827633	0	0.405	7.97243e-13
RGS7	2.31689e-17	-0.823295	0.077	0.486	8.42977e-13
BRE	2.36112e-17	-0.839755	0	0.405	8.59071e-13
PARP10	2.37442e-17	0.200271	0.145	0.02	8.63908e-13
CD83	2.47366e-17	-0.907389	0.043	0.444	9.00015e-13
C4orf48	2.8411e-17	0.226317	0.137	0.018	1.03371e-12
DLG1	3.12622e-17	-0.398288	0.684	0.847	1.13744e-12
GMFG	3.36122e-17	0.267258	0.197	0.036	1.22295e-12
VAV1	3.51398e-17	0.379537	0.308	0.079	1.27853e-12
PEX5L	4.51039e-17	-0.425731	0.701	0.853	1.64106e-12
PIP4K2A	4.54091e-17	-0.207019	0.923	0.945	1.65216e-12
PLCG2	4.73739e-17	0.503457	0.538	0.204	1.72365e-12
DHFR	4.74949e-17	0.348338	0.239	0.052	1.72806e-12
NELL2	5.13446e-17	-0.827765	0.017	0.422	1.86812e-12
CLCN7	5.66786e-17	0.362014	0.299	0.076	2.06219e-12
CTSL	5.78392e-17	0.254879	0.171	0.028	2.10442e-12
CTNND2	6.5611e-17	-0.536142	0.521	0.769	2.38719e-12
TRIM2	6.56513e-17	-0.463078	0.607	0.809	2.38866e-12
CSMD3	6.5971e-17	-0.766922	0.137	0.533	2.40029e-12
CTTNBP2	7.00604e-17	-0.485597	0.607	0.794	2.54908e-12
SLAIN1	7.99148e-17	-0.544086	0.521	0.807	2.90762e-12
RACK1	8.13449e-17	0.238864	0.197	0.036	2.95965e-12
ITGAM	8.47332e-17	0.341224	0.265	0.063	3.08293e-12
ENTPD1	8.53679e-17	0.518401	0.521	0.194	3.10603e-12
UGCG	8.64297e-17	0.375402	0.325	0.089	3.14466e-12
HCK	9.38658e-17	0.423644	0.402	0.125	3.41521e-12
HPGDS	9.43954e-17	0.335634	0.231	0.05	3.43448e-12
PTPN2	9.91368e-17	0.464378	0.487	0.174	3.60699e-12
CEBPD	1.04778e-16	0.479269	0.41	0.133	3.81224e-12
FCGRT	1.10075e-16	0.372655	0.282	0.071	4.00497e-12
MGAT4B	1.11941e-16	0.229221	0.111	0.013	4.07287e-12
PCDH15	1.20307e-16	-0.807702	0.043	0.44	4.37726e-12
HPS3	1.23696e-16	0.364807	0.308	0.081	4.50056e-12
LARGE	1.33506e-16	-0.808169	0	0.391	4.85748e-12
MBNL1	1.46894e-16	0.412512	0.88	0.67	5.34458e-12
LYL1	1.56844e-16	0.268075	0.145	0.022	5.70659e-12
RPL4	1.74418e-16	0.300137	0.231	0.05	6.34602e-12
IRAK2	1.94824e-16	-0.815173	0.12	0.489	7.08848e-12
CDC42SE1	2.26911e-16	0.392837	0.359	0.104	8.25594e-12
ST6GALNAC3	2.63789e-16	-0.357438	0.786	0.932	9.59769e-12
ST8SIA4	2.88603e-16	0.50042	0.462	0.17	1.05005e-11
SLC2A9	2.96154e-16	0.366756	0.282	0.071	1.07753e-11
AP1G2	3.129e-16	0.244645	0.128	0.018	1.13845e-11
ATG16L2	3.51621e-16	0.346685	0.291	0.074	1.27934e-11
PARP14	4.1187e-16	0.456949	0.359	0.111	1.49855e-11
NOD1	4.64836e-16	0.200629	0.145	0.022	1.69126e-11
KIAA0368	5.84182e-16	-0.777602	0	0.38	2.12549e-11
WASHC1	5.92632e-16	0.412583	0.444	0.147	2.15623e-11
GRM5	6.01329e-16	-0.78236	0.034	0.418	2.18788e-11
HS6ST3	8.31086e-16	-0.783362	0.051	0.442	3.02382e-11
OTUD7A	8.53804e-16	-0.499057	0.521	0.73	3.10648e-11
PTGS1	8.77011e-16	0.238703	0.171	0.03	3.19092e-11
NCAM1	9.53436e-16	-0.352744	0.718	0.849	3.46898e-11
ODZ4	9.5993e-16	-0.808308	0	0.375	3.49261e-11
XAF1	9.85187e-16	0.320372	0.265	0.065	3.58451e-11
SIGLEC9	1.03358e-15	0.210911	0.171	0.03	3.76059e-11
FRMD5	1.09782e-15	-0.311941	0.803	0.901	3.9943e-11
ZZZ3	1.27282e-15	-0.772328	0	0.373	4.63103e-11
CLEC5A	1.29328e-15	0.272205	0.137	0.021	4.70548e-11
NUFIP2	1.33963e-15	0.493916	0.556	0.224	4.8741e-11
HLA-DPA1	1.43365e-15	0.327076	0.291	0.075	5.21619e-11
ZNF536	1.59468e-15	-0.525184	0.487	0.764	5.8021e-11
YBX3	1.98757e-15	0.253572	0.188	0.037	7.23159e-11
DIP2B	2.45059e-15	-0.278356	0.812	0.896	8.91622e-11
SELPLG	2.93739e-15	0.282174	0.188	0.037	1.06874e-10
CHST15	3.11965e-15	0.316969	0.256	0.062	1.13505e-10
ATP6V0B	3.42965e-15	0.407391	0.333	0.099	1.24784e-10
CARD19	3.518e-15	0.231618	0.162	0.029	1.27999e-10
ARRB2	3.57438e-15	0.429357	0.368	0.119	1.3005e-10
IL17RA	3.8258e-15	0.442183	0.419	0.143	1.39198e-10
METTL21A	3.86827e-15	0.279015	0.222	0.049	1.40743e-10
NPL	3.97972e-15	0.479345	0.453	0.167	1.44798e-10
OGFR	4.09754e-15	0.240246	0.205	0.043	1.49085e-10
CEBPB	4.10107e-15	0.359783	0.325	0.094	1.49213e-10
SLC12A7	4.18237e-15	0.211153	0.137	0.021	1.52171e-10
KIRREL3	4.25817e-15	-0.4964	0.538	0.762	1.54929e-10
MEF2A	4.86915e-15	0.297762	0.94	0.826	1.77159e-10
PDE3B	5.58675e-15	-0.506454	0.564	0.765	2.03268e-10
DPP10	5.69526e-15	-0.694993	0.205	0.552	2.07216e-10
C16orf62	6.08554e-15	-0.753648	0	0.36	2.21416e-10
SLC39A10	6.78724e-15	0.402478	0.402	0.132	2.46947e-10
ADGRG1	6.96219e-15	0.457023	0.436	0.156	2.53312e-10
B2M	7.91854e-15	0.506421	0.453	0.174	2.88108e-10
TKT	8.00203e-15	0.270293	0.197	0.041	2.91146e-10
ARHGAP24	8.12487e-15	0.29457	0.949	0.834	2.95615e-10
RPL34	8.28624e-15	0.207147	0.137	0.021	3.01487e-10
PLEKHO1	8.92116e-15	0.346772	0.316	0.09	3.24587e-10
OOEP	9.37942e-15	0.245982	0.197	0.04	3.41261e-10
MAP2	9.444e-15	-0.732242	0.12	0.476	3.43611e-10
GPRIN3	1.01765e-14	0.412852	0.47	0.167	3.70263e-10
LCP1	1.07351e-14	0.36234	0.291	0.08	3.90586e-10
LAPTM4A	1.09067e-14	0.279976	0.222	0.051	3.96829e-10
RAB31	1.12557e-14	-0.536546	0.513	0.698	4.09527e-10
DLEU7	1.18922e-14	0.326901	0.256	0.066	4.32687e-10
PLEKHH1	1.28639e-14	-0.570414	0.385	0.666	4.68041e-10
PLSCR1	1.35073e-14	0.421922	0.368	0.121	4.9145e-10
DRAM2	1.45367e-14	0.378362	0.316	0.094	5.28904e-10
ASAH1	1.66005e-14	0.401437	0.385	0.125	6.03991e-10
PYGL	1.85296e-14	0.270106	0.205	0.045	6.7418e-10
PTPRE	1.89771e-14	0.511468	0.632	0.316	6.90462e-10
ZCCHC11	2.21576e-14	-0.731225	0	0.349	8.06184e-10
SLC1A4	2.35388e-14	0.257612	0.205	0.045	8.56436e-10
RPL35A	2.48847e-14	0.2138	0.162	0.03	9.05404e-10
RPS25	2.65194e-14	0.263486	0.162	0.03	9.6488e-10
RHOG	2.6967e-14	0.259001	0.222	0.051	9.81167e-10
PKM	2.70265e-14	0.350528	0.333	0.099	9.83332e-10
SERPINE1	2.7489e-14	-0.859025	0.085	0.439	1.00016e-09
ADRBK2	2.99767e-14	-0.730852	0	0.347	1.09067e-09
CLPTM1L	3.11425e-14	0.217916	0.154	0.027	1.13309e-09
TUBB	3.32813e-14	0.270119	0.205	0.046	1.21091e-09
KIAA1370	3.66387e-14	-0.719383	0	0.345	1.33306e-09
DCLK1	3.78168e-14	-0.720729	0.034	0.381	1.37592e-09
LDLRAD4	4.98494e-14	-0.214279	0.915	0.953	1.81372e-09
GTF3A	5.14152e-14	0.226446	0.179	0.036	1.87069e-09
RAPGEF5	5.20323e-14	-0.505521	0.462	0.68	1.89314e-09
ADAP1	5.46984e-14	0.272507	0.154	0.029	1.99015e-09
PRKCH	6.21031e-14	-0.596057	0.35	0.647	2.25956e-09
SERF2	6.52165e-14	0.372351	0.359	0.113	2.37284e-09
WASHC4	6.58339e-14	0.452181	0.556	0.235	2.3953e-09
SCN1B	7.00065e-14	0.246242	0.145	0.026	2.54712e-09
SIPA1	7.27623e-14	0.298796	0.214	0.05	2.64738e-09
SP140L	7.87416e-14	0.241382	0.205	0.046	2.86493e-09
TRIM14	8.08725e-14	0.204091	0.162	0.031	2.94247e-09
ADAM28	1.10956e-13	0.499212	0.684	0.375	4.03704e-09
NPAS3	1.11372e-13	-0.357059	0.718	0.886	4.05214e-09
ZYX	1.22076e-13	0.235365	0.137	0.023	4.44161e-09
FSCN1	1.35183e-13	0.329336	0.291	0.084	4.91852e-09
AIDA	1.43857e-13	0.329969	0.256	0.07	5.2341e-09
GRIA1	1.49811e-13	-0.709569	0.026	0.362	5.45073e-09
SIGLEC10	1.65427e-13	0.302338	0.239	0.061	6.01891e-09
CX3CR1	1.83322e-13	0.386817	0.291	0.088	6.66997e-09
PDE4B	1.91031e-13	-0.217711	0.915	0.962	6.95047e-09
SPI1	2.09551e-13	0.319093	0.274	0.078	7.6243e-09
SIRPA	2.10496e-13	0.377157	0.333	0.107	7.65867e-09
SAMD9L	2.114e-13	0.282815	0.214	0.051	7.69157e-09
ZBTB20	2.35278e-13	-0.21917	0.88	0.955	8.56034e-09
NARF	2.38579e-13	0.275924	0.231	0.058	8.68046e-09
GLTSCR1L	2.46725e-13	-0.699254	0	0.328	8.97685e-09
MX1	2.65369e-13	0.242361	0.137	0.024	9.65518e-09
SPOCK3	2.77647e-13	-0.402999	0.641	0.834	1.01019e-08
ARL5A	2.82425e-13	0.281655	0.299	0.086	1.02758e-08
BAG6	2.92022e-13	0.231217	0.145	0.027	1.06249e-08
MAPK10	3.13747e-13	-0.617032	0.265	0.583	1.14154e-08
INPPL1	3.15301e-13	0.290559	0.214	0.052	1.14719e-08
NUCB1	3.18582e-13	0.228211	0.171	0.035	1.15913e-08
EPHA6	3.51152e-13	-0.690984	0.06	0.399	1.27763e-08
PLXND1	3.61282e-13	0.278648	0.239	0.062	1.31449e-08
VPS28	3.69999e-13	0.280253	0.239	0.063	1.3462e-08
RP11-701H24.9	3.75294e-13	-0.68231	0	0.324	1.36547e-08
SH3RF3	4.25152e-13	0.496192	0.65	0.351	1.54687e-08
CACNA2D1	4.26528e-13	-0.541596	0.385	0.669	1.55188e-08
TNFAIP8	4.30719e-13	0.239132	0.188	0.041	1.56713e-08
MECOM	4.37519e-13	0.209415	0.128	0.021	1.59187e-08
ELL2	4.56646e-13	-0.437551	0.59	0.79	1.66146e-08
CALR	4.71813e-13	0.283211	0.197	0.046	1.71664e-08
PRPF4B	4.93686e-13	0.393293	0.487	0.191	1.79623e-08
GPHN	4.96517e-13	-0.44009	0.538	0.777	1.80653e-08
ENG	5.20036e-13	0.261484	0.188	0.042	1.8921e-08
NEK6	5.45341e-13	0.211422	0.145	0.027	1.98417e-08
DDX60L	5.60087e-13	0.288632	0.256	0.07	2.03782e-08
CSGALNACT1	5.88987e-13	-0.430885	0.658	0.883	2.14297e-08
CIITA	6.37494e-13	0.329579	0.299	0.09	2.31946e-08
DOCK2	7.24587e-13	0.450047	0.786	0.451	2.63634e-08
RPS7	7.39681e-13	0.214801	0.162	0.033	2.69126e-08
KYNU	7.68848e-13	0.330274	0.299	0.091	2.79738e-08
SAMHD1	8.52804e-13	0.402265	0.376	0.134	3.10284e-08
FASTK	9.90489e-13	0.215851	0.145	0.027	3.6038e-08
TMEM165	1.06795e-12	-0.294655	0.752	0.859	3.88562e-08
GCA	1.07549e-12	0.288671	0.282	0.082	3.91305e-08
DNM3	1.21016e-12	-0.311162	0.744	0.883	4.40305e-08
HMOX1	1.25862e-12	0.257027	0.205	0.05	4.57936e-08
FAM19A1	1.2854e-12	-0.669435	0.026	0.343	4.67682e-08
FAM134B	1.29818e-12	-0.668867	0	0.313	4.72331e-08
ANKZF1	1.32218e-12	0.277758	0.214	0.053	4.81062e-08
HIST1H2AC	1.43226e-12	0.395626	0.291	0.092	5.21112e-08
ZNRF2	1.43871e-12	0.423078	0.427	0.168	5.23461e-08
DEF6	1.68832e-12	0.283423	0.222	0.057	6.14279e-08
BSG	1.88803e-12	0.293147	0.231	0.061	6.86942e-08
PKD1	1.91536e-12	0.30497	0.299	0.092	6.96884e-08
HELZ	1.96028e-12	0.451424	0.59	0.289	7.13228e-08
CMKLR1	1.98889e-12	0.280452	0.239	0.064	7.23637e-08
ATP8B4	2.09675e-12	0.446508	0.761	0.479	7.62882e-08
ZCCHC6	2.14405e-12	-0.662012	0	0.309	7.8009e-08
GNS	2.22376e-12	0.230774	0.205	0.05	8.09094e-08
TLN1	2.31608e-12	0.26244	0.222	0.057	8.42684e-08
MLLT6	2.33993e-12	0.310565	0.282	0.085	8.51359e-08
PALM2	2.35025e-12	-0.546997	0.385	0.653	8.55116e-08
PPM1B	2.55412e-12	-0.540745	0.333	0.578	9.2929e-08
PSD3	2.55969e-12	-0.496177	0.444	0.701	9.31319e-08
DNAJC6	2.5811e-12	-0.409181	0.564	0.735	9.39108e-08
KLF7	2.77568e-12	-0.563622	0.316	0.563	1.0099e-07
ARRDC1	2.78764e-12	0.210519	0.145	0.028	1.01425e-07
CHKA	2.80458e-12	-0.437496	0.513	0.676	1.02042e-07
TSPAN14	2.81075e-12	0.37737	0.402	0.149	1.02266e-07
RALYL	2.85496e-12	-0.645203	0.094	0.434	1.03875e-07
BTG1	3.08325e-12	0.256509	0.188	0.044	1.12181e-07
TENM2	3.2519e-12	-0.66062	0.094	0.419	1.18317e-07
TRIM9	3.28518e-12	-0.63796	0.205	0.486	1.19528e-07
PCED1B	3.58771e-12	0.31614	0.256	0.074	1.30535e-07
RP11-219A15.1	3.75116e-12	-0.641246	0	0.303	1.36482e-07
KCNAB1	3.76541e-12	-0.659163	0.145	0.453	1.37001e-07
RNF44	3.7663e-12	0.220854	0.128	0.023	1.37033e-07
CD63	3.90424e-12	0.22591	0.188	0.044	1.42052e-07
TNFRSF1A	4.03463e-12	0.290505	0.248	0.071	1.46796e-07
C10orf76	4.37759e-12	-0.64048	0	0.302	1.59274e-07
TBC1D9	4.44214e-12	0.336963	0.308	0.1	1.61623e-07
CADPS	4.57432e-12	-0.652339	0.017	0.322	1.66432e-07
PLCB1	4.79553e-12	-0.634482	0.128	0.456	1.74481e-07
ATP8B1	5.01106e-12	0.223991	0.171	0.038	1.82322e-07
LAP3	5.47064e-12	0.23727	0.222	0.058	1.99044e-07
PPFIA2	5.52503e-12	-0.551054	0.35	0.615	2.01023e-07
AUTS2	6.55104e-12	-0.242782	0.838	0.917	2.38353e-07
TRERF1	6.60195e-12	0.256594	0.214	0.055	2.40205e-07
DNAJB2	6.62924e-12	0.362435	0.462	0.18	2.41198e-07
PIK3R6	6.79726e-12	0.206754	0.12	0.021	2.47312e-07
POLG	7.80291e-12	0.239296	0.197	0.048	2.83901e-07
FERMT3	7.80771e-12	0.202392	0.137	0.026	2.84076e-07
NR4A3	8.07398e-12	-0.753804	0.009	0.31	2.93764e-07
CDC37	8.19425e-12	0.252511	0.231	0.063	2.9814e-07
HNRNPA1	8.47863e-12	0.272089	0.231	0.063	3.08486e-07
ATP8A1	8.68772e-12	-0.411336	0.547	0.725	3.16094e-07
TLR5	9.6193e-12	0.274078	0.222	0.059	3.49988e-07
ARAP1	1.02704e-11	0.33233	0.359	0.126	3.73677e-07
TNFSF13B	1.08672e-11	0.237623	0.179	0.042	3.95391e-07
TAB2	1.15824e-11	0.462204	0.667	0.377	4.21413e-07
VOPP1	1.16513e-11	0.389274	0.376	0.141	4.2392e-07
MOB1A	1.33303e-11	0.316777	0.248	0.073	4.85011e-07
MGEA5	1.35538e-11	-0.619329	0	0.291	4.93143e-07
TRAF3IP3	1.37779e-11	0.214434	0.154	0.033	5.01297e-07
PRR13	1.43238e-11	0.204859	0.128	0.024	5.21157e-07
ZNF117	1.47057e-11	0.225273	0.154	0.033	5.35051e-07
IPCEF1	1.55497e-11	-0.417472	0.615	0.73	5.65762e-07
ARHGAP20	1.57055e-11	0.260383	0.214	0.056	5.7143e-07
PDE1C	1.59029e-11	-0.351189	0.658	0.776	5.78612e-07
MIB2	1.66663e-11	0.207262	0.154	0.033	6.06388e-07
NCK2	1.76879e-11	0.453666	0.675	0.37	6.43558e-07
BROX	1.79078e-11	0.22434	0.231	0.063	6.51558e-07
APAF1	1.83456e-11	0.35045	0.316	0.109	6.67487e-07
FKBP5	1.91822e-11	-0.239833	0.863	0.937	6.97926e-07
RGL2	1.98403e-11	0.237913	0.179	0.043	7.21869e-07
EPB41L3	2.00463e-11	0.423468	0.538	0.245	7.29366e-07
AC109326.1	2.0056e-11	-0.642989	0	0.287	7.29718e-07
ZMAT3	2.02726e-11	0.298896	0.291	0.092	7.376e-07
RPS20	2.14401e-11	0.205229	0.222	0.059	7.80077e-07
IDH1	2.22551e-11	0.22099	0.197	0.049	8.09731e-07
GRM7	2.30311e-11	-0.628381	0.077	0.377	8.37965e-07
A2M	2.44826e-11	0.412343	0.453	0.19	8.90777e-07
RGS12	2.58115e-11	0.354476	0.402	0.154	9.39127e-07
MAN1C1	2.66015e-11	0.266472	0.274	0.084	9.6787e-07
TNIP1	2.70003e-11	0.204752	0.137	0.027	9.82378e-07
CCDC50	2.75859e-11	0.367975	0.368	0.143	1.00369e-06
IQCJ-SCHIP1	2.77197e-11	-0.541744	0.299	0.566	1.00855e-06
GAA	2.92721e-11	0.281196	0.265	0.081	1.06504e-06
GSAP	2.99662e-11	0.3671	0.393	0.154	1.09029e-06
RPL37	3.04624e-11	0.26883	0.214	0.058	1.10835e-06
RPS6KB2	3.09968e-11	0.259342	0.171	0.04	1.12779e-06
TTLL7	3.12641e-11	-0.278154	0.752	0.854	1.13751e-06
RGS19	3.14562e-11	0.201466	0.145	0.03	1.1445e-06
HSPA1A	3.31744e-11	0.562771	0.368	0.161	1.20702e-06
SP100	3.69387e-11	0.422379	0.573	0.295	1.34398e-06
CHMP1A	3.80537e-11	0.233145	0.137	0.028	1.38455e-06
HEATR3	3.96448e-11	0.264258	0.214	0.059	1.44244e-06
SPCS3	4.0823e-11	0.237362	0.214	0.058	1.4853e-06
TYMP	4.22991e-11	0.213257	0.171	0.04	1.53901e-06
ADIPOR2	4.44031e-11	-0.451294	0.462	0.633	1.61556e-06
EIF4A1	4.49134e-11	0.266067	0.205	0.055	1.63413e-06
STAT6	4.7617e-11	0.27287	0.265	0.081	1.7325e-06
GNAI2	4.8561e-11	0.316704	0.316	0.108	1.76684e-06
KIAA1551	5.13269e-11	0.373255	0.35	0.134	1.86748e-06
ARNTL	5.39503e-11	0.208436	0.171	0.04	1.96293e-06
H1FX	5.49992e-11	0.211174	0.128	0.025	2.00109e-06
DAAM2	5.8782e-11	-0.571704	0.274	0.547	2.13872e-06
RIN2	5.99163e-11	-0.490771	0.444	0.625	2.17999e-06
MBD3	5.99441e-11	0.213739	0.137	0.028	2.18101e-06
KCND2	6.18308e-11	-0.613447	0.068	0.373	2.24965e-06
SLC7A7	6.41762e-11	0.2134	0.171	0.041	2.33499e-06
DHRS3	6.62404e-11	0.238885	0.214	0.059	2.41009e-06
WBP2	6.79599e-11	0.21685	0.222	0.062	2.47265e-06
COX5B	6.86069e-11	0.202294	0.171	0.041	2.49619e-06
LIMCH1	7.37604e-11	-0.382891	0.573	0.735	2.6837e-06
USP6NL	7.50465e-11	0.435942	0.479	0.225	2.73049e-06
LYST	7.67517e-11	0.39161	0.598	0.292	2.79253e-06
PTPN18	7.79566e-11	0.272764	0.291	0.094	2.83637e-06
FAM49B	7.81792e-11	0.332457	0.838	0.64	2.84447e-06
PCBP1	8.9461e-11	0.219728	0.188	0.048	3.25495e-06
MAMDC2	9.1991e-11	0.233065	0.222	0.062	3.347e-06
HSPBAP1	9.53342e-11	0.322273	0.333	0.119	3.46864e-06
ST3GAL6	9.56917e-11	0.38424	0.402	0.165	3.48165e-06
FRYL	9.69205e-11	-0.296165	0.735	0.849	3.52635e-06
PXK	1.08038e-10	-0.434518	0.47	0.66	3.93086e-06
DCC	1.10278e-10	-0.614649	0.06	0.342	4.01236e-06
PCDH7	1.12614e-10	-0.607013	0.06	0.348	4.09736e-06
SUCLG2	1.17896e-10	0.395937	0.513	0.238	4.28951e-06
RREB1	1.4354e-10	0.405433	0.427	0.183	5.22255e-06
EPSTI1	1.47955e-10	0.354761	0.291	0.102	5.3832e-06
PTOV1	1.49241e-10	0.239423	0.162	0.039	5.42998e-06
EIF4A2	1.60658e-10	0.335854	0.393	0.152	5.84539e-06
CREB5	1.65238e-10	-0.349028	0.615	0.731	6.01201e-06
PPM1G	1.6698e-10	0.241391	0.197	0.053	6.07539e-06
ADAMTS18	1.71717e-10	-0.629154	0.085	0.361	6.24775e-06
CACNB2	1.97897e-10	-0.590212	0.051	0.335	7.2003e-06
PTPRK	2.15447e-10	-0.348031	0.624	0.79	7.83882e-06
CTNNA2	2.20813e-10	-0.578928	0.188	0.479	8.03406e-06
POLR2F	2.20923e-10	-0.549869	0.308	0.538	8.03806e-06
B3GAT3	2.32657e-10	0.21004	0.162	0.039	8.46497e-06
HSP90B1	2.4541e-10	0.315997	0.291	0.1	8.92899e-06
HNRNPH1	2.50492e-10	0.378498	0.513	0.237	9.11389e-06
PRUNE2	2.55821e-10	-0.296838	0.718	0.799	9.30779e-06
GATS	2.65487e-10	-0.566442	0	0.262	9.65949e-06
ENO1	2.72709e-10	0.265463	0.299	0.101	9.92225e-06
SYNJ2	2.76097e-10	-0.535081	0.282	0.519	1.00455e-05
ENGASE	2.8517e-10	0.251049	0.154	0.037	1.03756e-05
ARL6IP4	2.89313e-10	0.26565	0.231	0.07	1.05264e-05
LRRC16A	2.8932e-10	-0.593781	0	0.261	1.05266e-05
ENPP2	2.99712e-10	-0.443398	0.436	0.661	1.09047e-05
ERICH1	3.03398e-10	0.305862	0.308	0.111	1.10388e-05
DLC1	3.05981e-10	-0.438355	0.462	0.673	1.11328e-05
RABAC1	3.16151e-10	0.211758	0.162	0.039	1.15028e-05
ARMC9	3.18479e-10	0.264725	0.222	0.066	1.15875e-05
EGR3	3.26687e-10	-0.592338	0.017	0.281	1.18862e-05
AGBL4	3.41426e-10	-0.603367	0.068	0.337	1.24224e-05
SH3GL3	3.81255e-10	-0.441432	0.444	0.672	1.38716e-05
PHACTR1	4.04802e-10	-0.484862	0.376	0.592	1.47283e-05
ARHGAP30	4.06222e-10	0.20623	0.188	0.05	1.478e-05
MFSD12	4.07013e-10	0.269427	0.248	0.079	1.48088e-05
LRRC4C	4.17498e-10	-0.534255	0.265	0.537	1.51902e-05
KIAA0930	4.39085e-10	0.357395	0.453	0.191	1.59757e-05
DAB1	5.00174e-10	-0.57013	0.145	0.427	1.81983e-05
NCKAP1L	5.04025e-10	0.313691	0.385	0.148	1.83385e-05
MDGA2	5.15869e-10	-0.586853	0.171	0.448	1.87694e-05
TMX1	5.26679e-10	0.216839	0.171	0.044	1.91627e-05
GRIP1	5.26819e-10	-0.580339	0.077	0.337	1.91678e-05
HECW2	5.49447e-10	-0.48957	0.342	0.567	1.99911e-05
BIN1	5.66404e-10	0.420424	0.718	0.42	2.0608e-05
FKBP8	6.01155e-10	0.234473	0.205	0.059	2.18724e-05
CYHR1	6.17901e-10	0.239445	0.205	0.059	2.24817e-05
ZC3HAV1	6.5095e-10	0.340082	0.342	0.132	2.36842e-05
SPG20	6.59595e-10	-0.546548	0	0.253	2.39987e-05
MT2A	6.63921e-10	0.284368	0.239	0.075	2.41561e-05
TCHP	7.04191e-10	0.258378	0.222	0.068	2.56213e-05
ATM	7.08525e-10	0.388004	0.752	0.485	2.5779e-05
SYNE1	7.11841e-10	-0.587892	0.162	0.411	2.58996e-05
PPM1F	7.16236e-10	0.205078	0.137	0.031	2.60595e-05
MYO1F	7.70287e-10	0.346025	0.479	0.207	2.80261e-05
ERCC6	7.80367e-10	0.212486	0.231	0.07	2.83929e-05
TNFRSF10D	8.20708e-10	0.214188	0.179	0.048	2.98606e-05
PKP4	8.51969e-10	-0.448234	0.427	0.625	3.0998e-05
SCD5	8.82141e-10	-0.402138	0.479	0.659	3.20958e-05
OSBPL1A	9.46669e-10	-0.410945	0.479	0.652	3.44436e-05
PARP8	9.52643e-10	0.396783	0.487	0.231	3.4661e-05
PTK2	1.00018e-09	-0.3427	0.641	0.819	3.63905e-05
USP15	1.02855e-09	0.405471	0.692	0.417	3.74228e-05
APMAP	1.03927e-09	0.268195	0.308	0.109	3.7813e-05
SAMSN1	1.04699e-09	0.392856	0.513	0.256	3.80935e-05
CDC14A	1.0715e-09	0.238124	0.231	0.072	3.89855e-05
OTUB1	1.10707e-09	0.243943	0.179	0.049	4.02796e-05
DERA	1.14345e-09	0.243107	0.248	0.08	4.16034e-05
C10orf90	1.14968e-09	-0.380683	0.547	0.73	4.183e-05
MLEC	1.22615e-09	0.208259	0.205	0.059	4.46121e-05
TNS3	1.31197e-09	0.383577	0.496	0.233	4.77348e-05
UNC93B1	1.34026e-09	0.238472	0.197	0.057	4.8764e-05
RP1-5O6.7	1.48523e-09	-0.533171	0	0.244	5.40385e-05
VSIR	1.55805e-09	0.348784	0.41	0.173	5.66883e-05
CMTM6	1.5876e-09	0.27146	0.333	0.123	5.77633e-05
KANK1	1.72295e-09	-0.479159	0.368	0.58	6.26878e-05
ZNF618	1.72886e-09	0.327137	0.248	0.086	6.29028e-05
TMEFF2	1.79962e-09	-0.432199	0.436	0.648	6.54772e-05
ANP32A	2.0243e-09	0.351062	0.393	0.171	7.36522e-05
IL1RAP	2.05754e-09	-0.583572	0.214	0.458	7.48615e-05
TYK2	2.06706e-09	0.215556	0.162	0.042	7.52079e-05
CNPY3	2.1027e-09	0.259921	0.248	0.082	7.65045e-05
APBB1IP	2.1546e-09	0.354813	0.855	0.606	7.83931e-05
CNTNAP5	2.17693e-09	-0.543349	0.043	0.296	7.92053e-05
CFLAR	2.20533e-09	0.337839	0.462	0.206	8.02387e-05
GAPDH	2.38323e-09	0.364999	0.427	0.194	8.67114e-05
PGM5	2.48569e-09	0.372563	0.402	0.179	9.04392e-05
SLCO3A1	2.51399e-09	-0.417159	0.453	0.642	9.14691e-05
TRAK1	2.77358e-09	0.347479	0.487	0.222	0.000100914
RAPGEF3	2.83587e-09	0.292193	0.222	0.072	0.00010318
SPECC1	2.87073e-09	-0.408029	0.444	0.626	0.000104449
OSBPL3	3.00223e-09	0.39335	0.547	0.274	0.000109233
JAK2	3.21494e-09	0.386297	0.538	0.276	0.000116973
AGPAT4	3.39851e-09	-0.482099	0.359	0.557	0.000123651
LGALS8	3.48951e-09	0.225853	0.154	0.04	0.000126962
SSBP2	3.49333e-09	0.372451	0.709	0.466	0.000127101
EIF2S2	3.56403e-09	0.218518	0.256	0.086	0.000129674
ALPK1	3.87114e-09	0.355429	0.402	0.178	0.000140847
TBRG1	4.18733e-09	0.277892	0.308	0.114	0.000152352
RP11-437B10.1	4.34066e-09	-0.503033	0	0.233	0.00015793
TRANK1	4.45611e-09	0.2322	0.231	0.074	0.000162131
DDB2	4.52289e-09	0.215905	0.197	0.058	0.000164561
CNTN5	4.56149e-09	-0.541196	0.051	0.3	0.000165965
ENOX1	4.70465e-09	-0.365803	0.556	0.704	0.000171174
IFNGR1	4.72761e-09	0.376431	0.59	0.322	0.000172009
DOK6	4.94514e-09	-0.540169	0.034	0.278	0.000179924
RPL29	5.14445e-09	0.231388	0.256	0.087	0.000187176
RP11-792A8.5	5.39434e-09	-0.515826	0	0.231	0.000196268
ADAMTS10	5.62021e-09	0.212558	0.179	0.051	0.000204486
TGOLN2	5.84088e-09	0.202974	0.256	0.085	0.000212514
LY86	5.85481e-09	0.342382	0.419	0.183	0.000213022
EEF1A1	6.00535e-09	0.325376	0.376	0.156	0.000218499
RIMS2	6.01506e-09	-0.52477	0.068	0.325	0.000218852
NISCH	6.17815e-09	0.212992	0.239	0.078	0.000224786
ATRNL1	6.26342e-09	-0.529218	0.111	0.366	0.000227888
ETV5	6.3174e-09	0.301002	0.274	0.1	0.000229852
ATF6B	6.54238e-09	0.200747	0.214	0.066	0.000238038
TRPM2	6.60279e-09	0.331266	0.419	0.185	0.000240236
GRID1	6.70828e-09	-0.442617	0.402	0.601	0.000244074
MFSD1	6.92238e-09	0.306767	0.368	0.151	0.000251864
EPS8	7.09174e-09	0.393991	0.538	0.288	0.000258026
UBE2G2	7.13515e-09	0.279671	0.342	0.132	0.000259605
PFKL	7.22799e-09	0.262956	0.231	0.077	0.000262983
ZNF791	7.3898e-09	0.233367	0.239	0.08	0.000268871
RPL14	7.45627e-09	0.228881	0.239	0.079	0.000271289
AK5	7.58837e-09	-0.433075	0.376	0.6	0.000276095
BNIP3L	7.94493e-09	0.329948	0.427	0.191	0.000289068
CERCAM	8.05226e-09	-0.44882	0.427	0.646	0.000292973
EVA1C	8.24969e-09	-0.514945	0.197	0.435	0.000300157
PRKG1	8.51871e-09	-0.529887	0.043	0.284	0.000309945
IRF2BP2	8.64263e-09	0.275894	0.248	0.087	0.000314454
DTNBP1	8.66718e-09	0.303555	0.291	0.11	0.000315347
MAX	8.86704e-09	0.273488	0.35	0.136	0.000322618
CC2D1A	9.22703e-09	0.203202	0.188	0.055	0.000335716
GPM6A	9.31534e-09	-0.508704	0.145	0.405	0.000338929
HADHA	9.58537e-09	0.261532	0.265	0.095	0.000348754
FAIM2	9.76088e-09	0.274454	0.256	0.093	0.00035514
C17orf63	9.7609e-09	-0.498646	0	0.225	0.00035514
RNF149	9.77537e-09	0.372399	0.59	0.309	0.000355667
EDIL3	1.00335e-08	-0.29418	0.709	0.859	0.000365057
FAM105A	1.02981e-08	-0.491475	0	0.224	0.000374688
CLK1	1.09557e-08	0.361295	0.393	0.182	0.000398612
RHBDF2	1.09815e-08	0.362658	0.701	0.412	0.000399551
USP54	1.13882e-08	-0.385284	0.453	0.619	0.000414347
RP11-566D24.2	1.14611e-08	-0.502546	0	0.223	0.000417
RP11-258C19.5	1.24169e-08	-0.485956	0	0.222	0.000451776
SKAP2	1.24252e-08	0.365407	0.701	0.431	0.000452079
KDM1A	1.27951e-08	0.211741	0.239	0.08	0.000465537
DDIT4	1.28665e-08	0.29719	0.248	0.089	0.000468136
RASGRF2	1.31814e-08	-0.532555	0.154	0.389	0.000479593
MAPK8IP1	1.33861e-08	0.236572	0.231	0.077	0.00048704
EIF2AK4	1.35909e-08	0.226562	0.256	0.09	0.000494491
LPP	1.36634e-08	0.329741	0.829	0.608	0.00049713
MAGI1	1.43896e-08	-0.414304	0.419	0.615	0.000523551
EEF2	1.46834e-08	0.225153	0.222	0.074	0.000534239
FAM63B	1.49615e-08	-0.480086	0	0.22	0.00054436
RUNX1	1.49813e-08	0.365708	0.769	0.558	0.00054508
CARD8	1.54649e-08	0.306475	0.333	0.136	0.000562674
PEAK1	1.54967e-08	-0.349241	0.564	0.683	0.000563832
TPT1	1.56913e-08	0.314099	0.359	0.149	0.000570913
CD53	1.58986e-08	0.352921	0.513	0.256	0.000578453
PLXNB2	1.63959e-08	0.210409	0.171	0.049	0.000596547
DOCK8	1.67829e-08	0.27236	0.846	0.711	0.000610628
FGF12	1.68211e-08	-0.516276	0.077	0.314	0.000612021
IPO8	1.74352e-08	0.241109	0.248	0.087	0.000634361
MT3	1.75e-08	0.311154	0.368	0.156	0.00063672
EPHA5	1.75083e-08	-0.495761	0.017	0.24	0.000637023
P4HB	1.8137e-08	0.221692	0.171	0.049	0.000659897
PHF11	1.83366e-08	0.226094	0.239	0.082	0.000667159
GALNT13	1.85232e-08	-0.494028	0.274	0.489	0.00067395
DSCAML1	1.8581e-08	-0.456281	0.333	0.531	0.000676051
RNF213	1.87575e-08	0.357195	0.496	0.259	0.000682473
ATP10D	1.95188e-08	0.236998	0.256	0.091	0.000710173
ZFP36	2.00237e-08	0.239075	0.214	0.07	0.000728542
SNX24	2.00529e-08	0.332137	0.342	0.147	0.000729604
LARP7	2.01934e-08	0.2561	0.231	0.08	0.000734717
TBC1D14	2.06306e-08	0.348497	0.436	0.208	0.000750625
RPL41	2.06726e-08	0.299093	0.299	0.116	0.000752152
ST6GALNAC5	2.11052e-08	-0.50932	0.06	0.295	0.000767892
MAML2	2.15276e-08	0.284313	0.949	0.762	0.000783259
C5orf42	2.16786e-08	-0.481753	0	0.216	0.000788754
ROBO1	2.20394e-08	-0.433439	0.393	0.601	0.00080188
NAGK	2.2337e-08	0.232914	0.205	0.067	0.000812708
ATP6V1B2	2.32254e-08	0.31354	0.385	0.171	0.000845033
GNG2	2.3256e-08	0.258384	0.282	0.106	0.000846145
XPO1	2.33558e-08	0.351357	0.444	0.22	0.000849777
FCGR1B	2.33987e-08	0.264998	0.179	0.055	0.000851339
SKIV2L2	2.40899e-08	-0.470374	0	0.215	0.000876487
C12orf75	2.53043e-08	0.213109	0.179	0.054	0.00092067
HK1	2.57718e-08	0.243158	0.256	0.092	0.000937679
PABPN1	2.57799e-08	0.305248	0.299	0.119	0.000937977
FAM192A	2.86766e-08	0.261612	0.265	0.1	0.00104337
MIA2	2.87353e-08	0.308006	0.368	0.163	0.00104551
PHACTR2	2.94031e-08	0.305211	0.333	0.136	0.0010698
CNDP1	3.10608e-08	-0.479367	0.291	0.504	0.00113012
SNAP25	3.18097e-08	-0.508133	0.145	0.387	0.00115736
UHRF1BP1	3.19389e-08	0.248072	0.265	0.097	0.00116206
PRKCD	3.38115e-08	0.219724	0.214	0.07	0.0012302
CFL1	3.47676e-08	0.279104	0.291	0.114	0.00126498
GS1-114I9.3	3.47868e-08	-0.471429	0	0.211	0.00126568
ADD3	3.50262e-08	-0.484271	0.222	0.439	0.00127439
SNCA	3.73359e-08	0.361648	0.53	0.269	0.00135843
PPP1R9A	3.81377e-08	-0.484275	0.214	0.448	0.0013876
CTNND1	3.88187e-08	0.250427	0.308	0.12	0.00141238
DISC1	4.07471e-08	0.370769	0.718	0.463	0.00148254
IGSF11	4.08305e-08	-0.471694	0.265	0.487	0.00148558
PPM1H	4.17913e-08	-0.482463	0.248	0.466	0.00152053
PGGT1B	4.22095e-08	0.206557	0.222	0.075	0.00153575
PDE8A	4.46943e-08	-0.298563	0.632	0.749	0.00162616
MYO1D	4.54939e-08	-0.424139	0.385	0.559	0.00165525
SNX13	4.63599e-08	0.35292	0.547	0.294	0.00168676
SYT17	4.64514e-08	0.251099	0.231	0.082	0.00169009
SLC38A2	4.86923e-08	0.341087	0.436	0.217	0.00177162
RPN1	4.94093e-08	0.209681	0.179	0.055	0.00179771
LAMTOR4	4.98004e-08	0.214397	0.197	0.064	0.00181194
LRRC69	4.98596e-08	0.208698	0.179	0.055	0.00181409
LRRFIP1	5.00189e-08	0.327086	0.436	0.206	0.00181989
SLCO2B1	5.04736e-08	0.361948	0.684	0.42	0.00183643
SPHKAP	5.05332e-08	-0.466007	0.009	0.222	0.0018386
WIPI2	5.0872e-08	0.21458	0.231	0.08	0.00185093
AES	5.11251e-08	0.238439	0.188	0.06	0.00186014
RIMS1	5.24501e-08	-0.488175	0.06	0.288	0.00190834
XRN2	5.34314e-08	0.295308	0.41	0.182	0.00194405
M6PR	5.49457e-08	0.214399	0.205	0.068	0.00199914
GPC5	5.58163e-08	-0.487067	0.085	0.326	0.00203082
FAM35A	5.85356e-08	-0.466787	0	0.205	0.00212976
MMS22L	5.93514e-08	0.243739	0.248	0.09	0.00215944
ATF7IP	6.11142e-08	0.348582	0.564	0.296	0.00222358
TMEM2	6.32592e-08	-0.452759	0	0.204	0.00230162
TNK2	6.66256e-08	0.260243	0.256	0.096	0.00242411
BCAS3	6.69631e-08	-0.298063	0.624	0.717	0.00243639
KCNJ3	6.71687e-08	-0.470912	0.026	0.243	0.00244387
RNF145	6.75279e-08	0.315901	0.444	0.212	0.00245693
SLC6A6	6.81122e-08	0.200485	0.179	0.056	0.00247819
HEATR5B	7.0785e-08	0.313204	0.402	0.184	0.00257544
PTBP3	7.12215e-08	0.293316	0.402	0.182	0.00259132
NTRK2	7.48312e-08	-0.459921	0.274	0.479	0.00272266
ARHGEF1	7.94027e-08	0.213463	0.205	0.069	0.00288899
MOBP	8.51933e-08	-0.339707	0.538	0.683	0.00309967
TMC6	8.8154e-08	0.288875	0.308	0.127	0.0032074
BACH1	9.03656e-08	0.374958	0.615	0.4	0.00328786
STK25	9.1712e-08	0.254239	0.171	0.054	0.00333685
GRIN2B	9.29523e-08	-0.473922	0.043	0.265	0.00338198
DNAJC13	1.0307e-07	0.289174	0.368	0.166	0.00375011
CSRNP3	1.03643e-07	-0.468989	0.094	0.328	0.00377093
FNIP2	1.04871e-07	-0.349573	0.53	0.635	0.00381562
RYR3	1.13645e-07	-0.462568	0.017	0.219	0.00413485
GRAMD3	1.14241e-07	-0.444768	0	0.197	0.00415655
LRFN5	1.22788e-07	-0.467092	0.043	0.256	0.00446753
TLR2	1.31265e-07	0.352693	0.564	0.348	0.00477594
SAMD12	1.31678e-07	-0.330269	0.538	0.668	0.00479097
SNX27	1.3308e-07	0.27562	0.368	0.162	0.00484199
FAM168A	1.36501e-07	0.361048	0.53	0.288	0.00496644
ZNF124	1.42392e-07	0.240708	0.248	0.094	0.0051808
CNTN1	1.42698e-07	-0.473523	0.145	0.382	0.00519193
DGKB	1.45858e-07	-0.457135	0.026	0.236	0.00530691
SNX5	1.47788e-07	0.204114	0.179	0.058	0.00537713
GRIA4	1.48957e-07	-0.507962	0.154	0.365	0.00541965
LPGAT1	1.5006e-07	-0.373233	0.462	0.61	0.00545979
C9orf3	1.52716e-07	-0.354518	0.487	0.629	0.00555642
KHDRBS3	1.55095e-07	-0.385366	0.444	0.622	0.00564297
ASTN2	1.60599e-07	-0.438963	0.325	0.524	0.00584324
SEPW1	1.63163e-07	-0.433432	0	0.193	0.00593653
CDC42BPA	1.66051e-07	-0.315684	0.564	0.698	0.00604161
TRIM22	1.727e-07	0.276615	0.308	0.132	0.00628353
TMX3	1.73355e-07	0.22451	0.265	0.102	0.00630735
ATP10B	1.7458e-07	-0.44382	0.282	0.489	0.00635191
SPSB3	1.78875e-07	0.203715	0.179	0.058	0.0065082
PARVG	1.80071e-07	0.270879	0.239	0.091	0.00655171
UGGT1	1.81609e-07	0.231529	0.274	0.108	0.00660765
HGS	1.92607e-07	0.201333	0.171	0.054	0.00700782
TMEM63A	1.93952e-07	-0.486476	0.197	0.395	0.00705673
NAALADL2	2.1486e-07	-0.35441	0.513	0.675	0.00781748
EPB41L2	2.20218e-07	0.207259	0.897	0.799	0.0080124
CCNH	2.22951e-07	-0.28746	0.641	0.73	0.00811184
CCL4L2	2.26671e-07	-0.480515	0	0.19	0.00824719
KCNQ5	2.29377e-07	-0.463273	0.111	0.324	0.00834564
NFKBIZ	2.32105e-07	0.249675	0.282	0.115	0.00844489
C1QTNF3-AMACR	2.3753e-07	-0.430858	0.299	0.509	0.0086423
VPS29	2.46703e-07	0.21739	0.256	0.098	0.00897603
RBM12B	2.57671e-07	0.204585	0.222	0.081	0.0093751
GRAMD1A	2.72041e-07	0.204469	0.179	0.059	0.00989793
GUK1	2.74423e-07	0.210464	0.248	0.094	0.00998459
DUSP22	2.75425e-07	0.212459	0.214	0.076	0.0100211
STX7	2.82497e-07	0.330379	0.581	0.324	0.0102784
CCM2	2.86301e-07	0.278302	0.427	0.195	0.0104168
BCAS1	2.9168e-07	-0.378938	0.427	0.584	0.0106125
CLMN	2.98157e-07	-0.319922	0.53	0.65	0.0108482
NFKBID	2.99737e-07	-0.465919	0.034	0.232	0.0109056
TMEM156	3.07488e-07	-0.41515	0.376	0.537	0.0111877
CCL3L3	3.14227e-07	-0.457306	0	0.186	0.0114328
LNPEP	3.22484e-07	0.283001	0.393	0.187	0.0117333
FLI1	3.23741e-07	0.334337	0.598	0.336	0.011779
RASSF3	3.25231e-07	0.248262	0.256	0.101	0.0118332
PDCD10	3.26139e-07	0.228016	0.265	0.104	0.0118662
ANO4	3.33615e-07	-0.357763	0.487	0.63	0.0121382
AFF3	3.44848e-07	-0.466489	0.06	0.267	0.012547
UBC	3.46248e-07	0.340827	0.402	0.21	0.0125979
CCL3	3.51543e-07	-0.499692	0.017	0.209	0.0127905
SYK	3.53574e-07	0.338051	0.547	0.306	0.0128644
SRRM2	3.67678e-07	0.320249	0.573	0.321	0.0133776
BAZ2A	3.73928e-07	0.206302	0.256	0.099	0.013605
KALRN	3.80269e-07	-0.450612	0.111	0.326	0.0138357
CTSB	3.80544e-07	0.353447	0.607	0.372	0.0138457
KCTD8	3.89682e-07	-0.463858	0.188	0.404	0.0141782
SEC14L5	3.93344e-07	-0.475007	0.12	0.32	0.0143114
PIEZO1	3.96639e-07	0.226045	0.239	0.092	0.0144313
TUBA1A	3.97763e-07	-0.451038	0.162	0.383	0.0144722
ARAP2	3.99207e-07	-0.25719	0.641	0.746	0.0145248
MSR1	3.99658e-07	0.36873	0.462	0.244	0.0145412
HSP90AB1	4.08383e-07	0.311582	0.376	0.18	0.0148586
RPS9	4.18873e-07	0.26156	0.282	0.118	0.0152403
CDH18	4.20099e-07	-0.437976	0.043	0.242	0.0152849
WNT5A	4.42723e-07	0.202615	0.171	0.056	0.016108
ANKIB1	4.45421e-07	-0.319078	0.504	0.626	0.0162062
RP11-106M3.2	4.45637e-07	-0.420579	0	0.182	0.0162141
GABRG2	4.53765e-07	-0.419891	0.017	0.21	0.0165098
CDK5RAP3	4.58085e-07	0.217411	0.239	0.09	0.016667
NSFL1C	4.74731e-07	0.205559	0.197	0.069	0.0172726
RRBP1	4.84812e-07	0.201332	0.274	0.109	0.0176394
MGAT4C	4.88799e-07	-0.438398	0.026	0.215	0.0177845
DSCAM	4.96527e-07	-0.381168	0.427	0.635	0.0180657
KCNQ1	4.97296e-07	0.293609	0.385	0.187	0.0180936
PFKFB3	4.977e-07	0.279996	0.333	0.15	0.0181083
VTI1A	5.03679e-07	0.311334	0.709	0.494	0.0183258
ALOX5	5.09061e-07	0.283963	0.376	0.175	0.0185217
USP45	5.19201e-07	0.221876	0.197	0.07	0.0188906
TMEM57	5.43522e-07	-0.403011	0	0.18	0.0197755
HIST2H2BF	5.46508e-07	0.239902	0.222	0.085	0.0198841
TMEM163	5.48611e-07	0.411622	0.368	0.2	0.0199607
ASIC2	5.50894e-07	-0.437087	0.026	0.213	0.0200437
IL6R	5.69343e-07	0.266043	0.333	0.148	0.020715
SMEK1	6.15094e-07	-0.394425	0	0.178	0.0223796
PURA	6.17857e-07	0.262752	0.316	0.141	0.0224801
TRAM1	6.23029e-07	0.203192	0.214	0.078	0.0226683
H2AFY	6.5802e-07	0.306402	0.402	0.198	0.0239414
NDUFS7	6.68108e-07	0.203331	0.188	0.065	0.0243084
NRG1	6.95545e-07	-0.424756	0.017	0.199	0.0253067
RASSF8	6.97689e-07	0.355238	0.521	0.308	0.0253847
FAM107B	6.99266e-07	-0.312774	0.538	0.622	0.0254421
CHD1L	7.35598e-07	0.232135	0.342	0.149	0.026764
RCSD1	7.50719e-07	0.284018	0.41	0.197	0.0273142
GRIN2A	7.58355e-07	-0.43662	0.085	0.289	0.027592
SCAF4	7.65218e-07	0.250001	0.325	0.143	0.0278417
ZDHHC2	7.65821e-07	0.218258	0.299	0.125	0.0278636
TUBA1B	7.81233e-07	0.300443	0.35	0.166	0.0284244
C14orf145	7.87035e-07	-0.407636	0	0.175	0.0286355
MANBA	7.9348e-07	0.316303	0.538	0.298	0.02887
COTL1	8.24663e-07	0.25447	0.299	0.128	0.0300046
GPX1	8.26688e-07	-0.410595	0	0.175	0.0300782
CMIP	8.44435e-07	0.329458	0.607	0.366	0.0307239
SLC4A10	8.45272e-07	-0.428639	0.051	0.249	0.0307544
EIF1	8.50463e-07	0.269133	0.376	0.173	0.0309433
STK32B	8.85352e-07	0.256322	0.239	0.096	0.0322126
C9orf72	9.33736e-07	0.26798	0.308	0.137	0.0339731
LDB2	9.46401e-07	-0.42124	0.034	0.222	0.0344339
SORT1	9.69812e-07	-0.278025	0.59	0.695	0.0352856
AGAP1	9.70941e-07	-0.205359	0.752	0.812	0.0353267
C16orf52	1.00583e-06	-0.387248	0	0.172	0.036596
FAM193B	1.01238e-06	0.218427	0.239	0.094	0.0368344
METTL9	1.04128e-06	0.249266	0.256	0.106	0.0378861
RBMS1	1.05236e-06	0.286278	0.325	0.151	0.0382892
PIK3CA	1.07708e-06	0.279601	0.427	0.216	0.0391885
STK39	1.08888e-06	-0.449245	0.205	0.386	0.039618
CADM1	1.09486e-06	-0.347229	0.47	0.64	0.0398354
CDH20	1.11439e-06	-0.307436	0.556	0.671	0.0405459
C6orf62	1.15458e-06	0.304868	0.41	0.21	0.0420082
ZNF100	1.16311e-06	0.206127	0.197	0.072	0.0423186
NBEA	1.16368e-06	-0.349158	0.47	0.61	0.0423394
KIAA1217	1.19223e-06	-0.41927	0.043	0.235	0.0433783
DCP2	1.19534e-06	0.234094	0.308	0.134	0.0434914
RNF144B	1.19706e-06	0.223305	0.239	0.095	0.043554
SNX14	1.19852e-06	0.235879	0.368	0.169	0.0436068
GABRB2	1.22097e-06	-0.43476	0.068	0.257	0.0444237
USP53	1.30193e-06	-0.408434	0.436	0.564	0.0473693
SND1	1.31326e-06	0.322379	0.496	0.287	0.0477817
MAP3K5	1.31437e-06	0.3198	0.556	0.32	0.0478222
KCTD16	1.3251e-06	-0.438325	0.085	0.279	0.0482124
