# Supplementary material for: Brain Cell Atlas: An Integrative Ensemble of Cell Transcriptomes Across Human Brain Regions
Source: Research Square preprint supplement (doi:10.21203/rs.3.rs-3221500/v1), 2023-08-04
Supplement: Supplementary file 16 [file Supplementary Table 6.xlsx]

## Sheet: Interaction info
Interaction weights/strength in prefrontal cortex region
Cell Type	Oligodendrocyte precursor	Oligodendrocyte	Newly formed oligodendrocyte	Astrocyte	Microglia	Microglia (PCDH9high)	Vascular leptomeningeal cell	Fibroblast	Endothelial	GABAergic	Glutamatergic	Glutamatergic(Pyr)
Oligodendrocyte precursor	2.1205	1.10022	1.72209	1.24015	0.105348	0.118522	0.0481972	0.0549806	0.122524	1.24812	1.23517	0.0165649
Oligodendrocyte	1.08861	1.10561	1.08103	0.686582	0.172379	0.416912	0.0668331	0.0354424	0.166978	0.538623	0.821304	0.0219053
Newly formed oligodendrocyte	1.67042	0.970925	1.44632	1.27535	0.106538	0.287517	0.0802679	0.0617751	0.134804	0.893462	0.994656	0.0184278
Astrocyte	1.82932	1.11175	1.6563	1.06482	0.0131978	0.0206507	0.0119016	0.0788668	0.0897183	0.990319	0.741353	0
Microglia	0.0228357	0.0793305	0.0675442	0.0322784	0.0717069	0.10553	0.0052208	0.0046176	0.0545433	0.00443285	0.00652141	0
Microglia (PCDH9high)	0.0762796	0.137578	0.0982658	0.0511623	0.159274	0.194243	0.0179173	0.0264798	0.0851999	0.020747	0.0343752	0
Vascular leptomeningeal cell	0.438706	0.0187141	0.282568	0.389693	0.0314659	0.0331473	0.24885	0.0339375	0.518709	0.184764	0.329499	0.179959
Fibroblast	0.360882	0.0274599	0.292087	0.394447	0.0789319	0.0941856	0.324947	0.120005	0.781402	0.327371	0.559503	0.287635
Endothelial	0.147149	0.0479447	0.142419	0.155252	0.105771	0.143072	0.117931	0.140324	0.403831	0.191975	0.174356	0.0560857
GABAergic	2.16183	1.30582	1.74209	0.73185	0.121071	0.169332	0.0275346	0.119195	0.142635	1.45371	1.12289	0.00336421
Glutamatergic	2.307	1.40362	1.91282	0.90447	0.142401	0.247671	0.0174667	0.0435852	0.104986	1.61495	1.4082	0.0201209
Glutamatergic(Pyr)	0.0447017	0.0503807	0.0398653	0.0294418	0.0899308	0.0842319	0	0.00464646	0	0.00336421	0.0116187	0.0063455
Number of interactions in prefrontal cortex region
Cell Type	Oligodendrocyte precursor	Oligodendrocyte	Newly formed oligodendrocyte	Astrocyte	Microglia	Microglia (PCDH9high)	Vascular leptomeningeal cell	Fibroblast	Endothelial	GABAergic	Glutamatergic	Glutamatergic(Pyr)
Oligodendrocyte precursor	28	10	29	23	5	8	7	5	8	19	23	3
Oligodendrocyte	15	11	19	16	3	9	6	3	7	8	17	2
Newly formed oligodendrocyte	25	13	24	27	6	9	10	4	8	14	20	3
Astrocyte	20	7	16	16	1	2	2	5	7	13	13	0
Microglia	3	3	4	3	7	13	1	1	2	1	2	0
Microglia (PCDH9high)	8	8	9	7	11	18	4	3	5	3	7	0
Vascular leptomeningeal cell	19	2	31	32	2	3	26	2	20	8	12	10
Fibroblast	23	4	33	37	3	7	27	6	24	14	24	11
Endothelial	21	4	31	29	4	10	18	5	23	17	24	9
GABAergic	22	12	22	15	3	8	2	5	7	18	23	1
Glutamatergic	25	13	30	21	6	11	8	4	13	19	32	5
Glutamatergic(Pyr)	4	1	5	1	3	3	0	1	0	1	3	1
Interaction weights/strength in hippocampus region
Cell Type	Oligodendrocyte precursor	Oligodendrocyte	Newly formed oligodendrocyte	Astrocyte	Microglia	Microglia (PCDH9high)	Vascular leptomeningeal cell	Fibroblast	Endothelial	GABAergic	Glutamatergic	Glutamatergic(Pyr)
Oligodendrocyte precursor	2.06534	1.26617	1.55816	1.0014	0.0417902	1.20433	0.0563813	0.069673	0.1617	1.43607	1.32427	0.0153874
Oligodendrocyte	1.24164	1.02987	0.962363	0.62271	0.0585811	0.899003	0.060761	0.0324853	0.200357	0.726352	1.21769	0
Newly formed oligodendrocyte	1.59164	0.889795	1.40985	0.875765	0.0373108	0.831559	0.0355814	0.0989949	0.134992	1.1318	1.11482	0
Astrocyte	1.46013	1.11948	1.2487	0.756804	0.0127583	0.662615	0.022196	0.0800284	0.110232	1.05672	0.782091	0
Microglia	0.0199767	0.028601	0.00896857	0.0249284	0.00843099	0.0474862	0.0491047	0	0.0838835	0.0200256	0.068066	0
Microglia (PCDH9high)	1.44643	0.829041	0.785583	0.356789	0.0496686	0.699271	0.0540736	0.0257353	0.143874	0.68128	0.872843	0
Vascular leptomeningeal cell	0.304173	0.0188604	0.123411	0.362919	0.0108788	0.12182	0.227807	0.0399842	0.543384	0.121564	0.389749	0
Fibroblast	0.385019	0.0148817	0.22114	0.530604	0.0112145	0.168588	0.36998	0.123677	1.01672	0.312963	0.85418	0
Endothelial	0.126238	0.0510787	0.160858	0.196133	0.0362601	0.101825	0.165632	0.160352	0.544618	0.224998	0.280433	0
GABAergic	2.07243	1.62523	1.82119	0.826809	0.073582	1.1648	0.0710538	0.141079	0.215327	1.73281	1.32379	0.040971
Glutamatergic	1.96681	1.44238	1.69389	1.00365	0.0760999	1.20189	0.0886145	0.057316	0.127491	1.76232	1.36395	0.0593547
Glutamatergic(Pyr)	0.083795	0.00883243	0	0.0467621	0.0131581	0.00841244	0	0.00678241	0.00217605	0.0336638	0.042907	0
Number of interactions in prefrontal hippocampus region
Cell Type	Oligodendrocyte precursor	Oligodendrocyte	Newly formed oligodendrocyte	Astrocyte	Microglia	Microglia (PCDH9high)	Vascular leptomeningeal cell	Fibroblast	Endo	GABAergic	Glutamatergic	Glutamatergic(Pyr)
Oligodendrocyte precursor	24	10	17	26	3	12	9	5	14	26	33	2
Oligodendrocyte	16	10	10	17	2	13	6	2	11	14	26	0
Newly formed oligodendrocyte	20	9	13	20	2	9	4	3	9	19	24	0
Astrocyte	19	7	10	20	2	6	4	5	12	21	22	0
Microglia	2	2	1	2	1	3	2	0	2	3	4	0
Microglia (PCDH9high)	13	10	6	9	2	12	4	1	7	11	17	0
Vascular leptomeningeal cell	19	2	14	42	1	13	18	2	19	18	42	0
Fibroblast	22	3	16	46	1	13	19	4	24	32	61	0
Endo	15	4	14	30	1	11	19	5	27	25	46	0
GABAergic	20	13	17	20	4	12	9	5	14	27	33	3
Glutamatergic	27	13	23	30	4	17	16	8	22	35	54	4
Glutamatergic(Pyr)	3	1	0	2	1	1	0	1	1	1	1	0

## Sheet: Cell-cell communication
index	source	target	ligand	receptor	prob	pval	interaction_name	interaction_name_2	pathway_name	annotation	evidence	source.target	prob.original	group.names	dataset
878	Vascular leptomeningeal cell	Newly formed oligodendrocyte	AGRN	DAG1	0.178985	3	AGRN_DAG1	AGRN - DAG1	AGRN	ECM-Receptor	KEGG: hsa04512	Vascular leptomeningeal cell -> Newly formed oligodendrocyte (CC)	0.00374602	Vascular leptomeningeal cell -> Newly formed oligodendrocyte	Prefrontal cortex
879	Endothelial	Newly formed oligodendrocyte	AGRN	DAG1	0.148133	3	AGRN_DAG1	AGRN - DAG1	AGRN	ECM-Receptor	KEGG: hsa04512	Endothelial -> Newly formed oligodendrocyte (CC)	0.00117006	Endothelial -> Newly formed oligodendrocyte	Prefrontal cortex
880	Glutamatergic	Newly formed oligodendrocyte	AGRN	DAG1	0.149143	3	AGRN_DAG1	AGRN - DAG1	AGRN	ECM-Receptor	KEGG: hsa04512	Glutamatergic -> Newly formed oligodendrocyte (CC)	0.00122479	Glutamatergic -> Newly formed oligodendrocyte	Prefrontal cortex
1828	Astrocyte	Endothelial	ANGPT1	TEK	0.171591	3	ANGPT1_TEK	ANGPT1 - TEK	ANGPT	Secreted Signaling	PMID: 20651738	Astrocyte -> Endothelial (Hippo)	0.00294447	Astrocyte -> Endothelial	Hippocampus
199	Endothelial	Oligodendrocyte precursor	ANGPT2	TEK	0.179579	3	ANGPT2_TEK	ANGPT2 - TEK	ANGPT	Secreted Signaling	PMID: 20651738	Endothelial -> Oligodendrocyte precursor (CC)	0.00381585	Endothelial -> Oligodendrocyte precursor	Prefrontal cortex
200	Endothelial	Endothelial	ANGPT2	TEK	0.18772	3	ANGPT2_TEK	ANGPT2 - TEK	ANGPT	Secreted Signaling	PMID: 20651738	Endothelial -> Endothelial (CC)	0.00485827	Endothelial -> Endothelial	Prefrontal cortex
1829	Endothelial	Endothelial	ANGPT2	TEK	0.187816	3	ANGPT2_TEK	ANGPT2 - TEK	ANGPT	Secreted Signaling	PMID: 20651738	Endothelial -> Endothelial (Hippo)	0.00487151	Endothelial -> Endothelial	Hippocampus
186	Astrocyte	Oligodendrocyte precursor	ANGPTL4	CDH11	0.189086	3	ANGPTL4_CDH11	ANGPTL4 - CDH11	ANGPTL	Secreted Signaling	PMID: 30049845	Astrocyte -> Oligodendrocyte precursor (CC)	0.00504889	Astrocyte -> Oligodendrocyte precursor	Prefrontal cortex
187	Astrocyte	Newly formed oligodendrocyte	ANGPTL4	CDH11	0.170052	3	ANGPTL4_CDH11	ANGPTL4 - CDH11	ANGPTL	Secreted Signaling	PMID: 30049845	Astrocyte -> Newly formed oligodendrocyte (CC)	0.0027932	Astrocyte -> Newly formed oligodendrocyte	Prefrontal cortex
188	Astrocyte	Astrocyte	ANGPTL4	CDH11	0.171611	3	ANGPTL4_CDH11	ANGPTL4 - CDH11	ANGPTL	Secreted Signaling	PMID: 30049845	Astrocyte -> Astrocyte (CC)	0.00294656	Astrocyte -> Astrocyte	Prefrontal cortex
189	Astrocyte	Vascular leptomeningeal cell	ANGPTL4	CDH11	0.188022	3	ANGPTL4_CDH11	ANGPTL4 - CDH11	ANGPTL	Secreted Signaling	PMID: 30049845	Astrocyte -> Vascular leptomeningeal cell (CC)	0.00489993	Astrocyte -> Vascular leptomeningeal cell	Prefrontal cortex
190	Astrocyte	Fibroblast	ANGPTL4	CDH11	0.257014	3	ANGPTL4_CDH11	ANGPTL4 - CDH11	ANGPTL	Secreted Signaling	PMID: 30049845	Astrocyte -> Fibroblast (CC)	0.0204282	Astrocyte -> Fibroblast	Prefrontal cortex
191	Astrocyte	Endothelial	ANGPTL4	CDH11	0.177587	3	ANGPTL4_CDH11	ANGPTL4 - CDH11	ANGPTL	Secreted Signaling	PMID: 30049845	Astrocyte -> Endothelial (CC)	0.00358488	Astrocyte -> Endothelial	Prefrontal cortex
192	Astrocyte	GABAergic	ANGPTL4	CDH11	0.159121	3	ANGPTL4_CDH11	ANGPTL4 - CDH11	ANGPTL	Secreted Signaling	PMID: 30049845	Astrocyte -> GABAergic (CC)	0.00186496	Astrocyte -> GABAergic	Prefrontal cortex
193	Astrocyte	Glutamatergic	ANGPTL4	CDH11	0.168158	3	ANGPTL4_CDH11	ANGPTL4 - CDH11	ANGPTL	Secreted Signaling	PMID: 30049845	Astrocyte -> Glutamatergic (CC)	0.0026142	Astrocyte -> Glutamatergic	Prefrontal cortex
1817	Astrocyte	Oligodendrocyte precursor	ANGPTL4	CDH11	0.184004	3	ANGPTL4_CDH11	ANGPTL4 - CDH11	ANGPTL	Secreted Signaling	PMID: 30049845	Astrocyte -> Oligodendrocyte precursor (Hippo)	0.00436276	Astrocyte -> Oligodendrocyte precursor	Hippocampus
1818	Astrocyte	Newly formed oligodendrocyte	ANGPTL4	CDH11	0.161296	3	ANGPTL4_CDH11	ANGPTL4 - CDH11	ANGPTL	Secreted Signaling	PMID: 30049845	Astrocyte -> Newly formed oligodendrocyte (Hippo)	0.00202991	Astrocyte -> Newly formed oligodendrocyte	Hippocampus
1819	Astrocyte	Astrocyte	ANGPTL4	CDH11	0.175535	3	ANGPTL4_CDH11	ANGPTL4 - CDH11	ANGPTL	Secreted Signaling	PMID: 30049845	Astrocyte -> Astrocyte (Hippo)	0.0033564	Astrocyte -> Astrocyte	Hippocampus
1820	Astrocyte	Vascular leptomeningeal cell	ANGPTL4	CDH11	0.184085	3	ANGPTL4_CDH11	ANGPTL4 - CDH11	ANGPTL	Secreted Signaling	PMID: 30049845	Astrocyte -> Vascular leptomeningeal cell (Hippo)	0.00437317	Astrocyte -> Vascular leptomeningeal cell	Hippocampus
1821	Astrocyte	Fibroblast	ANGPTL4	CDH11	0.250486	3	ANGPTL4_CDH11	ANGPTL4 - CDH11	ANGPTL	Secreted Signaling	PMID: 30049845	Astrocyte -> Fibroblast (Hippo)	0.0184585	Astrocyte -> Fibroblast	Hippocampus
1822	Astrocyte	Endothelial	ANGPTL4	CDH11	0.181638	3	ANGPTL4_CDH11	ANGPTL4 - CDH11	ANGPTL	Secreted Signaling	PMID: 30049845	Astrocyte -> Endothelial (Hippo)	0.00406452	Astrocyte -> Endothelial	Hippocampus
1823	Astrocyte	GABAergic	ANGPTL4	CDH11	0.169247	3	ANGPTL4_CDH11	ANGPTL4 - CDH11	ANGPTL	Secreted Signaling	PMID: 30049845	Astrocyte -> GABAergic (Hippo)	0.00271622	Astrocyte -> GABAergic	Hippocampus
1824	Astrocyte	Glutamatergic	ANGPTL4	CDH11	0.210208	3	ANGPTL4_CDH11	ANGPTL4 - CDH11	ANGPTL	Secreted Signaling	PMID: 30049845	Astrocyte -> Glutamatergic (Hippo)	0.00858971	Astrocyte -> Glutamatergic	Hippocampus
185	Astrocyte	Endothelial	ANGPTL4	CDH5	0.184863	3	ANGPTL4_CDH5	ANGPTL4 - CDH5	ANGPTL	Secreted Signaling	PMID: 30049845	Astrocyte -> Endothelial (CC)	0.00447421	Astrocyte -> Endothelial	Prefrontal cortex
1816	Astrocyte	Endothelial	ANGPTL4	CDH5	0.18364	3	ANGPTL4_CDH5	ANGPTL4 - CDH5	ANGPTL	Secreted Signaling	PMID: 30049845	Astrocyte -> Endothelial (Hippo)	0.00431595	Astrocyte -> Endothelial	Hippocampus
194	Astrocyte	Astrocyte	ANGPTL4	SDC2	0.180071	3	ANGPTL4_SDC2	ANGPTL4 - SDC2	ANGPTL	Secreted Signaling	PMID: 29017031	Astrocyte -> Astrocyte (CC)	0.00387445	Astrocyte -> Astrocyte	Prefrontal cortex
1825	Astrocyte	Astrocyte	ANGPTL4	SDC2	0.169539	3	ANGPTL4_SDC2	ANGPTL4 - SDC2	ANGPTL	Secreted Signaling	PMID: 29017031	Astrocyte -> Astrocyte (Hippo)	0.00274402	Astrocyte -> Astrocyte	Hippocampus
195	Astrocyte	Oligodendrocyte precursor	ANGPTL4	SDC3	0.230373	3	ANGPTL4_SDC3	ANGPTL4 - SDC3	ANGPTL	Secreted Signaling	PMID: 29017031	Astrocyte -> Oligodendrocyte precursor (CC)	0.0130263	Astrocyte -> Oligodendrocyte precursor	Prefrontal cortex
196	Astrocyte	Newly formed oligodendrocyte	ANGPTL4	SDC3	0.159986	3	ANGPTL4_SDC3	ANGPTL4 - SDC3	ANGPTL	Secreted Signaling	PMID: 29017031	Astrocyte -> Newly formed oligodendrocyte (CC)	0.0019294	Astrocyte -> Newly formed oligodendrocyte	Prefrontal cortex
197	Astrocyte	Glutamatergic	ANGPTL4	SDC3	0.153403	3	ANGPTL4_SDC3	ANGPTL4 - SDC3	ANGPTL	Secreted Signaling	PMID: 29017031	Astrocyte -> Glutamatergic (CC)	0.00147546	Astrocyte -> Glutamatergic	Prefrontal cortex
1826	Astrocyte	Oligodendrocyte precursor	ANGPTL4	SDC3	0.173083	3	ANGPTL4_SDC3	ANGPTL4 - SDC3	ANGPTL	Secreted Signaling	PMID: 29017031	Astrocyte -> Oligodendrocyte precursor (Hippo)	0.00309626	Astrocyte -> Oligodendrocyte precursor	Hippocampus
198	Astrocyte	Astrocyte	ANGPTL4	SDC4	0.196195	3	ANGPTL4_SDC4	ANGPTL4 - SDC4	ANGPTL	Secreted Signaling	PMID: 29017031	Astrocyte -> Astrocyte (CC)	0.00611527	Astrocyte -> Astrocyte	Prefrontal cortex
1827	Astrocyte	Astrocyte	ANGPTL4	SDC4	0.178761	3	ANGPTL4_SDC4	ANGPTL4 - SDC4	ANGPTL	Secreted Signaling	PMID: 29017031	Astrocyte -> Astrocyte (Hippo)	0.00371991	Astrocyte -> Astrocyte	Hippocampus
899	Microglia (PCDH9high)	Microglia (PCDH9high)	APP	CD74	0.337026	3	APP_CD74	APP - CD74	APP	Cell-Cell Contact	PMID: 19849849	Microglia (PCDH9high) -> Microglia (PCDH9high) (CC)	0.0514509	Microglia (PCDH9high) -> Microglia (PCDH9high)	Prefrontal cortex
900	Oligodendrocyte precursor	Microglia (PCDH9high)	APP	CD74	0.413782	3	APP_CD74	APP - CD74	APP	Cell-Cell Contact	PMID: 19849849	Oligodendrocyte precursor -> Microglia (PCDH9high) (CC)	0.0892125	Oligodendrocyte precursor -> Microglia (PCDH9high)	Prefrontal cortex
901	Oligodendrocyte	Microglia (PCDH9high)	APP	CD74	0.487096	3	APP_CD74	APP - CD74	APP	Cell-Cell Contact	PMID: 19849849	Oligodendrocyte -> Microglia (PCDH9high) (CC)	0.128351	Oligodendrocyte -> Microglia (PCDH9high)	Prefrontal cortex
902	Newly formed oligodendrocyte	Microglia (PCDH9high)	APP	CD74	0.38885	3	APP_CD74	APP - CD74	APP	Cell-Cell Contact	PMID: 19849849	Newly formed oligodendrocyte -> Microglia (PCDH9high) (CC)	0.0764067	Newly formed oligodendrocyte -> Microglia (PCDH9high)	Prefrontal cortex
903	Vascular leptomeningeal cell	Microglia (PCDH9high)	APP	CD74	0.280546	3	APP_CD74	APP - CD74	APP	Cell-Cell Contact	PMID: 19849849	Vascular leptomeningeal cell -> Microglia (PCDH9high) (CC)	0.0283117	Vascular leptomeningeal cell -> Microglia (PCDH9high)	Prefrontal cortex
904	Fibroblast	Microglia (PCDH9high)	APP	CD74	0.37457	3	APP_CD74	APP - CD74	APP	Cell-Cell Contact	PMID: 19849849	Fibroblast -> Microglia (PCDH9high) (CC)	0.0692712	Fibroblast -> Microglia (PCDH9high)	Prefrontal cortex
905	Endothelial	Microglia (PCDH9high)	APP	CD74	0.421044	3	APP_CD74	APP - CD74	APP	Cell-Cell Contact	PMID: 19849849	Endothelial -> Microglia (PCDH9high) (CC)	0.0930101	Endothelial -> Microglia (PCDH9high)	Prefrontal cortex
906	GABAergic	Microglia (PCDH9high)	APP	CD74	0.451748	3	APP_CD74	APP - CD74	APP	Cell-Cell Contact	PMID: 19849849	GABAergic -> Microglia (PCDH9high) (CC)	0.109304	GABAergic -> Microglia (PCDH9high)	Prefrontal cortex
907	Glutamatergic	Microglia (PCDH9high)	APP	CD74	0.451646	3	APP_CD74	APP - CD74	APP	Cell-Cell Contact	PMID: 19849849	Glutamatergic -> Microglia (PCDH9high) (CC)	0.109249	Glutamatergic -> Microglia (PCDH9high)	Prefrontal cortex
908	Glutamatergic(Pyr)	Microglia (PCDH9high)	APP	CD74	0.320348	3	APP_CD74	APP - CD74	APP	Cell-Cell Contact	PMID: 19849849	Glutamatergic(Pyr) -> Microglia (PCDH9high) (CC)	0.0440865	Glutamatergic(Pyr) -> Microglia (PCDH9high)	Prefrontal cortex
909	Microglia (PCDH9high)	Microglia	APP	CD74	0.341372	3	APP_CD74	APP - CD74	APP	Cell-Cell Contact	PMID: 19849849	Microglia (PCDH9high) -> Microglia (CC)	0.0534316	Microglia (PCDH9high) -> Microglia	Prefrontal cortex
910	Oligodendrocyte precursor	Microglia	APP	CD74	0.420081	3	APP_CD74	APP - CD74	APP	Cell-Cell Contact	PMID: 19849849	Oligodendrocyte precursor -> Microglia (CC)	0.0925051	Oligodendrocyte precursor -> Microglia	Prefrontal cortex
911	Oligodendrocyte	Microglia	APP	CD74	0.49546	3	APP_CD74	APP - CD74	APP	Cell-Cell Contact	PMID: 19849849	Oligodendrocyte -> Microglia (CC)	0.132878	Oligodendrocyte -> Microglia	Prefrontal cortex
912	Newly formed oligodendrocyte	Microglia	APP	CD74	0.394489	3	APP_CD74	APP - CD74	APP	Cell-Cell Contact	PMID: 19849849	Newly formed oligodendrocyte -> Microglia (CC)	0.0792678	Newly formed oligodendrocyte -> Microglia	Prefrontal cortex
913	Vascular leptomeningeal cell	Microglia	APP	CD74	0.283626	3	APP_CD74	APP - CD74	APP	Cell-Cell Contact	PMID: 19849849	Vascular leptomeningeal cell -> Microglia (CC)	0.0294292	Vascular leptomeningeal cell -> Microglia	Prefrontal cortex
914	Fibroblast	Microglia	APP	CD74	0.379842	3	APP_CD74	APP - CD74	APP	Cell-Cell Contact	PMID: 19849849	Fibroblast -> Microglia (CC)	0.0718859	Fibroblast -> Microglia	Prefrontal cortex
915	Endothelial	Microglia	APP	CD74	0.427541	3	APP_CD74	APP - CD74	APP	Cell-Cell Contact	PMID: 19849849	Endothelial -> Microglia (CC)	0.096428	Endothelial -> Microglia	Prefrontal cortex
916	GABAergic	Microglia	APP	CD74	0.459096	3	APP_CD74	APP - CD74	APP	Cell-Cell Contact	PMID: 19849849	GABAergic -> Microglia (CC)	0.113246	GABAergic -> Microglia	Prefrontal cortex
917	Glutamatergic	Microglia	APP	CD74	0.45899	3	APP_CD74	APP - CD74	APP	Cell-Cell Contact	PMID: 19849849	Glutamatergic -> Microglia (CC)	0.113189	Glutamatergic -> Microglia	Prefrontal cortex
918	Glutamatergic(Pyr)	Microglia	APP	CD74	0.324304	3	APP_CD74	APP - CD74	APP	Cell-Cell Contact	PMID: 19849849	Glutamatergic(Pyr) -> Microglia (CC)	0.0457973	Glutamatergic(Pyr) -> Microglia	Prefrontal cortex
2641	Microglia (PCDH9high)	Microglia (PCDH9high)	APP	CD74	0.255111	3	APP_CD74	APP - CD74	APP	Cell-Cell Contact	PMID: 19849849	Microglia (PCDH9high) -> Microglia (PCDH9high) (Hippo)	0.019844	Microglia (PCDH9high) -> Microglia (PCDH9high)	Hippocampus
2642	Oligodendrocyte precursor	Microglia (PCDH9high)	APP	CD74	0.253163	3	APP_CD74	APP - CD74	APP	Cell-Cell Contact	PMID: 19849849	Oligodendrocyte precursor -> Microglia (PCDH9high) (Hippo)	0.0192543	Oligodendrocyte precursor -> Microglia (PCDH9high)	Hippocampus
2643	Oligodendrocyte	Microglia (PCDH9high)	APP	CD74	0.268341	3	APP_CD74	APP - CD74	APP	Cell-Cell Contact	PMID: 19849849	Oligodendrocyte -> Microglia (PCDH9high) (Hippo)	0.0240746	Oligodendrocyte -> Microglia (PCDH9high)	Hippocampus
2644	Newly formed oligodendrocyte	Microglia (PCDH9high)	APP	CD74	0.249678	3	APP_CD74	APP - CD74	APP	Cell-Cell Contact	PMID: 19849849	Newly formed oligodendrocyte -> Microglia (PCDH9high) (Hippo)	0.0182213	Newly formed oligodendrocyte -> Microglia (PCDH9high)	Hippocampus
2645	Astrocyte	Microglia (PCDH9high)	APP	CD74	0.186792	3	APP_CD74	APP - CD74	APP	Cell-Cell Contact	PMID: 19849849	Astrocyte -> Microglia (PCDH9high) (Hippo)	0.00473131	Astrocyte -> Microglia (PCDH9high)	Hippocampus
2646	Microglia	Microglia (PCDH9high)	APP	CD74	0.191391	3	APP_CD74	APP - CD74	APP	Cell-Cell Contact	PMID: 19849849	Microglia -> Microglia (PCDH9high) (Hippo)	0.00538092	Microglia -> Microglia (PCDH9high)	Hippocampus
2647	Vascular leptomeningeal cell	Microglia (PCDH9high)	APP	CD74	0.201244	3	APP_CD74	APP - CD74	APP	Cell-Cell Contact	PMID: 19849849	Vascular leptomeningeal cell -> Microglia (PCDH9high) (Hippo)	0.00694939	Vascular leptomeningeal cell -> Microglia (PCDH9high)	Hippocampus
2648	Fibroblast	Microglia (PCDH9high)	APP	CD74	0.202487	3	APP_CD74	APP - CD74	APP	Cell-Cell Contact	PMID: 19849849	Fibroblast -> Microglia (PCDH9high) (Hippo)	0.00716474	Fibroblast -> Microglia (PCDH9high)	Hippocampus
2649	Endothelial	Microglia (PCDH9high)	APP	CD74	0.266249	3	APP_CD74	APP - CD74	APP	Cell-Cell Contact	PMID: 19849849	Endothelial -> Microglia (PCDH9high) (Hippo)	0.0233797	Endothelial -> Microglia (PCDH9high)	Hippocampus
2650	GABAergic	Microglia (PCDH9high)	APP	CD74	0.27792	3	APP_CD74	APP - CD74	APP	Cell-Cell Contact	PMID: 19849849	GABAergic -> Microglia (PCDH9high) (Hippo)	0.0273741	GABAergic -> Microglia (PCDH9high)	Hippocampus
2651	Glutamatergic	Microglia (PCDH9high)	APP	CD74	0.272161	3	APP_CD74	APP - CD74	APP	Cell-Cell Contact	PMID: 19849849	Glutamatergic -> Microglia (PCDH9high) (Hippo)	0.0253671	Glutamatergic -> Microglia (PCDH9high)	Hippocampus
2652	Glutamatergic(Pyr)	Microglia (PCDH9high)	APP	CD74	0.209291	3	APP_CD74	APP - CD74	APP	Cell-Cell Contact	PMID: 19849849	Glutamatergic(Pyr) -> Microglia (PCDH9high) (Hippo)	0.00841244	Glutamatergic(Pyr) -> Microglia (PCDH9high)	Hippocampus
2653	Microglia (PCDH9high)	Microglia	APP	CD74	0.287438	3	APP_CD74	APP - CD74	APP	Cell-Cell Contact	PMID: 19849849	Microglia (PCDH9high) -> Microglia (Hippo)	0.0308379	Microglia (PCDH9high) -> Microglia	Hippocampus
2654	Oligodendrocyte precursor	Microglia	APP	CD74	0.284994	3	APP_CD74	APP - CD74	APP	Cell-Cell Contact	PMID: 19849849	Oligodendrocyte precursor -> Microglia (Hippo)	0.0299315	Oligodendrocyte precursor -> Microglia	Hippocampus
2655	Oligodendrocyte	Microglia	APP	CD74	0.304123	3	APP_CD74	APP - CD74	APP	Cell-Cell Contact	PMID: 19849849	Oligodendrocyte -> Microglia (Hippo)	0.0373232	Oligodendrocyte -> Microglia	Hippocampus
2656	Newly formed oligodendrocyte	Microglia	APP	CD74	0.280631	3	APP_CD74	APP - CD74	APP	Cell-Cell Contact	PMID: 19849849	Newly formed oligodendrocyte -> Microglia (Hippo)	0.0283422	Newly formed oligodendrocyte -> Microglia	Hippocampus
2657	Astrocyte	Microglia	APP	CD74	0.20391	3	APP_CD74	APP - CD74	APP	Cell-Cell Contact	PMID: 19849849	Astrocyte -> Microglia (Hippo)	0.00741591	Astrocyte -> Microglia	Hippocampus
2658	Microglia	Microglia	APP	CD74	0.209387	3	APP_CD74	APP - CD74	APP	Cell-Cell Contact	PMID: 19849849	Microglia -> Microglia (Hippo)	0.00843099	Microglia -> Microglia	Hippocampus
2659	Vascular leptomeningeal cell	Microglia	APP	CD74	0.221193	3	APP_CD74	APP - CD74	APP	Cell-Cell Contact	PMID: 19849849	Vascular leptomeningeal cell -> Microglia (Hippo)	0.0108788	Vascular leptomeningeal cell -> Microglia	Hippocampus
2660	Fibroblast	Microglia	APP	CD74	0.22269	3	APP_CD74	APP - CD74	APP	Cell-Cell Contact	PMID: 19849849	Fibroblast -> Microglia (Hippo)	0.0112145	Fibroblast -> Microglia	Hippocampus
2661	Endothelial	Microglia	APP	CD74	0.301474	3	APP_CD74	APP - CD74	APP	Cell-Cell Contact	PMID: 19849849	Endothelial -> Microglia (Hippo)	0.0362601	Endothelial -> Microglia	Hippocampus
2662	GABAergic	Microglia	APP	CD74	0.3163	3	APP_CD74	APP - CD74	APP	Cell-Cell Contact	PMID: 19849849	GABAergic -> Microglia (Hippo)	0.0423597	GABAergic -> Microglia	Hippocampus
2663	Glutamatergic	Microglia	APP	CD74	0.308969	3	APP_CD74	APP - CD74	APP	Cell-Cell Contact	PMID: 19849849	Glutamatergic -> Microglia (Hippo)	0.0392983	Glutamatergic -> Microglia	Hippocampus
2664	Glutamatergic(Pyr)	Microglia	APP	CD74	0.230909	3	APP_CD74	APP - CD74	APP	Cell-Cell Contact	PMID: 19849849	Glutamatergic(Pyr) -> Microglia (Hippo)	0.0131581	Glutamatergic(Pyr) -> Microglia	Hippocampus
1887	Glutamatergic	Microglia (PCDH9high)	BDNF	NTRK2	0.237075	3	BDNF_NTRK2	BDNF - NTRK2	NT	Secreted Signaling	PMID: 27908981	Glutamatergic -> Microglia (PCDH9high) (Hippo)	0.014727	Glutamatergic -> Microglia (PCDH9high)	Hippocampus
1888	Glutamatergic	Oligodendrocyte precursor	BDNF	NTRK2	0.347893	3	BDNF_NTRK2	BDNF - NTRK2	NT	Secreted Signaling	PMID: 27908981	Glutamatergic -> Oligodendrocyte precursor (Hippo)	0.0564473	Glutamatergic -> Oligodendrocyte precursor	Hippocampus
1889	Glutamatergic	Oligodendrocyte	BDNF	NTRK2	0.236742	3	BDNF_NTRK2	BDNF - NTRK2	NT	Secreted Signaling	PMID: 27908981	Glutamatergic -> Oligodendrocyte (Hippo)	0.0146398	Glutamatergic -> Oligodendrocyte	Hippocampus
1890	Glutamatergic	Newly formed oligodendrocyte	BDNF	NTRK2	0.248838	3	BDNF_NTRK2	BDNF - NTRK2	NT	Secreted Signaling	PMID: 27908981	Glutamatergic -> Newly formed oligodendrocyte (Hippo)	0.0179768	Glutamatergic -> Newly formed oligodendrocyte	Hippocampus
1891	Glutamatergic	Astrocyte	BDNF	NTRK2	0.415632	3	BDNF_NTRK2	BDNF - NTRK2	NT	Secreted Signaling	PMID: 27908981	Glutamatergic -> Astrocyte (Hippo)	0.0901774	Glutamatergic -> Astrocyte	Hippocampus
1892	Glutamatergic	Vascular leptomeningeal cell	BDNF	NTRK2	0.207275	3	BDNF_NTRK2	BDNF - NTRK2	NT	Secreted Signaling	PMID: 27908981	Glutamatergic -> Vascular leptomeningeal cell (Hippo)	0.00803056	Glutamatergic -> Vascular leptomeningeal cell	Hippocampus
1893	Glutamatergic	Fibroblast	BDNF	NTRK2	0.233097	3	BDNF_NTRK2	BDNF - NTRK2	NT	Secreted Signaling	PMID: 27908981	Glutamatergic -> Fibroblast (Hippo)	0.013704	Glutamatergic -> Fibroblast	Hippocampus
1894	Glutamatergic	GABAergic	BDNF	NTRK2	0.37126	3	BDNF_NTRK2	BDNF - NTRK2	NT	Secreted Signaling	PMID: 27908981	Glutamatergic -> GABAergic (Hippo)	0.0676416	Glutamatergic -> GABAergic	Hippocampus
1895	Glutamatergic	Glutamatergic	BDNF	NTRK2	0.308218	3	BDNF_NTRK2	BDNF - NTRK2	NT	Secreted Signaling	PMID: 27908981	Glutamatergic -> Glutamatergic (Hippo)	0.0389898	Glutamatergic -> Glutamatergic	Hippocampus
1896	Glutamatergic	Glutamatergic(Pyr)	BDNF	NTRK2	0.216795	3	BDNF_NTRK2	BDNF - NTRK2	NT	Secreted Signaling	PMID: 27908981	Glutamatergic -> Glutamatergic(Pyr) (Hippo)	0.00992548	Glutamatergic -> Glutamatergic(Pyr)	Hippocampus
5	Fibroblast	Fibroblast	BMP5	ACVR1_BMPR2	0.157785	3	BMP5_ACVR1_BMPR2	BMP5 - (ACVR1+BMPR2)	BMP	Secreted Signaling	KEGG: hsa04350; PMID:26893264	Fibroblast -> Fibroblast (CC)	0.00176829	Fibroblast -> Fibroblast	Prefrontal cortex
6	Fibroblast	Endothelial	BMP5	ACVR1_BMPR2	0.190117	3	BMP5_ACVR1_BMPR2	BMP5 - (ACVR1+BMPR2)	BMP	Secreted Signaling	KEGG: hsa04350; PMID:26893264	Fibroblast -> Endothelial (CC)	0.00519579	Fibroblast -> Endothelial	Prefrontal cortex
7	Fibroblast	Oligodendrocyte precursor	BMP5	BMPR1A_ACVR2A	0.159211	3	BMP5_BMPR1A_ACVR2A	BMP5 - (BMPR1A+ACVR2A)	BMP	Secreted Signaling	KEGG: hsa04350; PMID:26893264	Fibroblast -> Oligodendrocyte precursor (CC)	0.00187159	Fibroblast -> Oligodendrocyte precursor	Prefrontal cortex
8	Fibroblast	Newly formed oligodendrocyte	BMP5	BMPR1A_ACVR2A	0.15184	3	BMP5_BMPR1A_ACVR2A	BMP5 - (BMPR1A+ACVR2A)	BMP	Secreted Signaling	KEGG: hsa04350; PMID:26893264	Fibroblast -> Newly formed oligodendrocyte (CC)	0.00137969	Fibroblast -> Newly formed oligodendrocyte	Prefrontal cortex
9	Fibroblast	GABAergic	BMP5	BMPR1A_ACVR2A	0.152869	3	BMP5_BMPR1A_ACVR2A	BMP5 - (BMPR1A+ACVR2A)	BMP	Secreted Signaling	KEGG: hsa04350; PMID:26893264	Fibroblast -> GABAergic (CC)	0.00144224	Fibroblast -> GABAergic	Prefrontal cortex
10	Fibroblast	Glutamatergic	BMP5	BMPR1A_ACVR2A	0.152907	3	BMP5_BMPR1A_ACVR2A	BMP5 - (BMPR1A+ACVR2A)	BMP	Secreted Signaling	KEGG: hsa04350; PMID:26893264	Fibroblast -> Glutamatergic (CC)	0.00144461	Fibroblast -> Glutamatergic	Prefrontal cortex
11	Fibroblast	Microglia (PCDH9high)	BMP5	BMPR1A_BMPR2	0.166517	3	BMP5_BMPR1A_BMPR2	BMP5 - (BMPR1A+BMPR2)	BMP	Secreted Signaling	KEGG: hsa04350; PMID:26893264	Fibroblast -> Microglia (PCDH9high) (CC)	0.00246543	Fibroblast -> Microglia (PCDH9high)	Prefrontal cortex
12	Fibroblast	Oligodendrocyte precursor	BMP5	BMPR1A_BMPR2	0.166285	3	BMP5_BMPR1A_BMPR2	BMP5 - (BMPR1A+BMPR2)	BMP	Secreted Signaling	KEGG: hsa04350; PMID:26893264	Fibroblast -> Oligodendrocyte precursor (CC)	0.00244485	Fibroblast -> Oligodendrocyte precursor	Prefrontal cortex
13	Fibroblast	Newly formed oligodendrocyte	BMP5	BMPR1A_BMPR2	0.161816	3	BMP5_BMPR1A_BMPR2	BMP5 - (BMPR1A+BMPR2)	BMP	Secreted Signaling	KEGG: hsa04350; PMID:26893264	Fibroblast -> Newly formed oligodendrocyte (CC)	0.00207071	Fibroblast -> Newly formed oligodendrocyte	Prefrontal cortex
14	Fibroblast	Astrocyte	BMP5	BMPR1A_BMPR2	0.169924	3	BMP5_BMPR1A_BMPR2	BMP5 - (BMPR1A+BMPR2)	BMP	Secreted Signaling	KEGG: hsa04350; PMID:26893264	Fibroblast -> Astrocyte (CC)	0.00278093	Fibroblast -> Astrocyte	Prefrontal cortex
15	Fibroblast	Vascular leptomeningeal cell	BMP5	BMPR1A_BMPR2	0.166204	3	BMP5_BMPR1A_BMPR2	BMP5 - (BMPR1A+BMPR2)	BMP	Secreted Signaling	KEGG: hsa04350; PMID:26893264	Fibroblast -> Vascular leptomeningeal cell (CC)	0.00243773	Fibroblast -> Vascular leptomeningeal cell	Prefrontal cortex
16	Fibroblast	Fibroblast	BMP5	BMPR1A_BMPR2	0.171259	3	BMP5_BMPR1A_BMPR2	BMP5 - (BMPR1A+BMPR2)	BMP	Secreted Signaling	KEGG: hsa04350; PMID:26893264	Fibroblast -> Fibroblast (CC)	0.00291148	Fibroblast -> Fibroblast	Prefrontal cortex
17	Fibroblast	GABAergic	BMP5	BMPR1A_BMPR2	0.172334	3	BMP5_BMPR1A_BMPR2	BMP5 - (BMPR1A+BMPR2)	BMP	Secreted Signaling	KEGG: hsa04350; PMID:26893264	Fibroblast -> GABAergic (CC)	0.0030194	Fibroblast -> GABAergic	Prefrontal cortex
18	Fibroblast	Glutamatergic	BMP5	BMPR1A_BMPR2	0.171439	3	BMP5_BMPR1A_BMPR2	BMP5 - (BMPR1A+BMPR2)	BMP	Secreted Signaling	KEGG: hsa04350; PMID:26893264	Fibroblast -> Glutamatergic (CC)	0.00292929	Fibroblast -> Glutamatergic	Prefrontal cortex
19	Fibroblast	Astrocyte	BMP5	BMPR1B_BMPR2	0.192294	3	BMP5_BMPR1B_BMPR2	BMP5 - (BMPR1B+BMPR2)	BMP	Secreted Signaling	KEGG: hsa04350; PMID:26893264	Fibroblast -> Astrocyte (CC)	0.00551451	Fibroblast -> Astrocyte	Prefrontal cortex
1602	Fibroblast	GABAergic	BMP6	ACVR1_ACVR2A	0.156398	3	BMP6_ACVR1_ACVR2A	BMP6 - (ACVR1+ACVR2A)	BMP	Secreted Signaling	KEGG: hsa04350; PMID:26893264	Fibroblast -> GABAergic (Hippo)	0.00167163	Fibroblast -> GABAergic	Hippocampus
1603	Endothelial	GABAergic	BMP6	ACVR1_ACVR2A	0.153907	3	BMP6_ACVR1_ACVR2A	BMP6 - (ACVR1+ACVR2A)	BMP	Secreted Signaling	KEGG: hsa04350; PMID:26893264	Endothelial -> GABAergic (Hippo)	0.0015073	Endothelial -> GABAergic	Hippocampus
1604	Fibroblast	Glutamatergic	BMP6	ACVR1_ACVR2A	0.207548	3	BMP6_ACVR1_ACVR2A	BMP6 - (ACVR1+ACVR2A)	BMP	Secreted Signaling	KEGG: hsa04350; PMID:26893264	Fibroblast -> Glutamatergic (Hippo)	0.00808163	Fibroblast -> Glutamatergic	Hippocampus
1605	Endothelial	Glutamatergic	BMP6	ACVR1_ACVR2A	0.203212	3	BMP6_ACVR1_ACVR2A	BMP6 - (ACVR1+ACVR2A)	BMP	Secreted Signaling	KEGG: hsa04350; PMID:26893264	Endothelial -> Glutamatergic (Hippo)	0.00729199	Endothelial -> Glutamatergic	Hippocampus
20	Endothelial	Fibroblast	BMP6	ACVR1_BMPR2	0.162819	3	BMP6_ACVR1_BMPR2	BMP6 - (ACVR1+BMPR2)	BMP	Secreted Signaling	KEGG: hsa04350; PMID:26893264	Endothelial -> Fibroblast (CC)	0.00215104	Endothelial -> Fibroblast	Prefrontal cortex
21	Endothelial	Endothelial	BMP6	ACVR1_BMPR2	0.197452	3	BMP6_ACVR1_BMPR2	BMP6 - (ACVR1+BMPR2)	BMP	Secreted Signaling	KEGG: hsa04350; PMID:26893264	Endothelial -> Endothelial (CC)	0.006317	Endothelial -> Endothelial	Prefrontal cortex
1606	Fibroblast	Endothelial	BMP6	ACVR1_BMPR2	0.227539	3	BMP6_ACVR1_BMPR2	BMP6 - (ACVR1+BMPR2)	BMP	Secreted Signaling	KEGG: hsa04350; PMID:26893264	Fibroblast -> Endothelial (Hippo)	0.0123407	Fibroblast -> Endothelial	Hippocampus
1607	Endothelial	Endothelial	BMP6	ACVR1_BMPR2	0.222357	3	BMP6_ACVR1_BMPR2	BMP6 - (ACVR1+BMPR2)	BMP	Secreted Signaling	KEGG: hsa04350; PMID:26893264	Endothelial -> Endothelial (Hippo)	0.0111393	Endothelial -> Endothelial	Hippocampus
1608	Fibroblast	GABAergic	BMP6	ACVR1_BMPR2	0.179559	3	BMP6_ACVR1_BMPR2	BMP6 - (ACVR1+BMPR2)	BMP	Secreted Signaling	KEGG: hsa04350; PMID:26893264	Fibroblast -> GABAergic (Hippo)	0.00381351	Fibroblast -> GABAergic	Hippocampus
1609	Endothelial	GABAergic	BMP6	ACVR1_BMPR2	0.17629	3	BMP6_ACVR1_BMPR2	BMP6 - (ACVR1+BMPR2)	BMP	Secreted Signaling	KEGG: hsa04350; PMID:26893264	Endothelial -> GABAergic (Hippo)	0.00343936	Endothelial -> GABAergic	Hippocampus
1610	Fibroblast	Glutamatergic	BMP6	ACVR1_BMPR2	0.227633	3	BMP6_ACVR1_BMPR2	BMP6 - (ACVR1+BMPR2)	BMP	Secreted Signaling	KEGG: hsa04350; PMID:26893264	Fibroblast -> Glutamatergic (Hippo)	0.0123631	Fibroblast -> Glutamatergic	Hippocampus
1611	Endothelial	Glutamatergic	BMP6	ACVR1_BMPR2	0.222449	3	BMP6_ACVR1_BMPR2	BMP6 - (ACVR1+BMPR2)	BMP	Secreted Signaling	KEGG: hsa04350; PMID:26893264	Endothelial -> Glutamatergic (Hippo)	0.01116	Endothelial -> Glutamatergic	Hippocampus
22	Endothelial	Oligodendrocyte precursor	BMP6	BMPR1A_ACVR2A	0.164338	3	BMP6_BMPR1A_ACVR2A	BMP6 - (BMPR1A+ACVR2A)	BMP	Secreted Signaling	KEGG: hsa04350; PMID:26893264	Endothelial -> Oligodendrocyte precursor (CC)	0.0022767	Endothelial -> Oligodendrocyte precursor	Prefrontal cortex
23	Endothelial	Newly formed oligodendrocyte	BMP6	BMPR1A_ACVR2A	0.156498	3	BMP6_BMPR1A_ACVR2A	BMP6 - (BMPR1A+ACVR2A)	BMP	Secreted Signaling	KEGG: hsa04350; PMID:26893264	Endothelial -> Newly formed oligodendrocyte (CC)	0.00167847	Endothelial -> Newly formed oligodendrocyte	Prefrontal cortex
24	Endothelial	GABAergic	BMP6	BMPR1A_ACVR2A	0.157591	3	BMP6_BMPR1A_ACVR2A	BMP6 - (BMPR1A+ACVR2A)	BMP	Secreted Signaling	KEGG: hsa04350; PMID:26893264	Endothelial -> GABAergic (CC)	0.00175452	Endothelial -> GABAergic	Prefrontal cortex
25	Endothelial	Glutamatergic	BMP6	BMPR1A_ACVR2A	0.157631	3	BMP6_BMPR1A_ACVR2A	BMP6 - (BMPR1A+ACVR2A)	BMP	Secreted Signaling	KEGG: hsa04350; PMID:26893264	Endothelial -> Glutamatergic (CC)	0.00175739	Endothelial -> Glutamatergic	Prefrontal cortex
1612	Fibroblast	GABAergic	BMP6	BMPR1A_ACVR2A	0.17524	3	BMP6_BMPR1A_ACVR2A	BMP6 - (BMPR1A+ACVR2A)	BMP	Secreted Signaling	KEGG: hsa04350; PMID:26893264	Fibroblast -> GABAergic (Hippo)	0.00332441	Fibroblast -> GABAergic	Hippocampus
1613	Endothelial	GABAergic	BMP6	BMPR1A_ACVR2A	0.172124	3	BMP6_BMPR1A_ACVR2A	BMP6 - (BMPR1A+ACVR2A)	BMP	Secreted Signaling	KEGG: hsa04350; PMID:26893264	Endothelial -> GABAergic (Hippo)	0.0029981	Endothelial -> GABAergic	Hippocampus
1614	Fibroblast	Glutamatergic	BMP6	BMPR1A_ACVR2A	0.204212	3	BMP6_BMPR1A_ACVR2A	BMP6 - (BMPR1A+ACVR2A)	BMP	Secreted Signaling	KEGG: hsa04350; PMID:26893264	Fibroblast -> Glutamatergic (Hippo)	0.00746983	Fibroblast -> Glutamatergic	Hippocampus
1615	Endothelial	Glutamatergic	BMP6	BMPR1A_ACVR2A	0.20001	3	BMP6_BMPR1A_ACVR2A	BMP6 - (BMPR1A+ACVR2A)	BMP	Secreted Signaling	KEGG: hsa04350; PMID:26893264	Endothelial -> Glutamatergic (Hippo)	0.00673955	Endothelial -> Glutamatergic	Hippocampus
26	Endothelial	Microglia (PCDH9high)	BMP6	BMPR1A_BMPR2	0.17213	3	BMP6_BMPR1A_BMPR2	BMP6 - (BMPR1A+BMPR2)	BMP	Secreted Signaling	KEGG: hsa04350; PMID:26893264	Endothelial -> Microglia (PCDH9high) (CC)	0.00299879	Endothelial -> Microglia (PCDH9high)	Prefrontal cortex
27	Endothelial	Oligodendrocyte precursor	BMP6	BMPR1A_BMPR2	0.171883	3	BMP6_BMPR1A_BMPR2	BMP6 - (BMPR1A+BMPR2)	BMP	Secreted Signaling	KEGG: hsa04350; PMID:26893264	Endothelial -> Oligodendrocyte precursor (CC)	0.00297377	Endothelial -> Oligodendrocyte precursor	Prefrontal cortex
28	Endothelial	Newly formed oligodendrocyte	BMP6	BMPR1A_BMPR2	0.167113	3	BMP6_BMPR1A_BMPR2	BMP6 - (BMPR1A+BMPR2)	BMP	Secreted Signaling	KEGG: hsa04350; PMID:26893264	Endothelial -> Newly formed oligodendrocyte (CC)	0.00251884	Endothelial -> Newly formed oligodendrocyte	Prefrontal cortex
29	Endothelial	Astrocyte	BMP6	BMPR1A_BMPR2	0.175772	3	BMP6_BMPR1A_BMPR2	BMP6 - (BMPR1A+BMPR2)	BMP	Secreted Signaling	KEGG: hsa04350; PMID:26893264	Endothelial -> Astrocyte (CC)	0.00338237	Endothelial -> Astrocyte	Prefrontal cortex
30	Endothelial	Vascular leptomeningeal cell	BMP6	BMPR1A_BMPR2	0.171795	3	BMP6_BMPR1A_BMPR2	BMP6 - (BMPR1A+BMPR2)	BMP	Secreted Signaling	KEGG: hsa04350; PMID:26893264	Endothelial -> Vascular leptomeningeal cell (CC)	0.002965	Endothelial -> Vascular leptomeningeal cell	Prefrontal cortex
31	Endothelial	Fibroblast	BMP6	BMPR1A_BMPR2	0.1772	3	BMP6_BMPR1A_BMPR2	BMP6 - (BMPR1A+BMPR2)	BMP	Secreted Signaling	KEGG: hsa04350; PMID:26893264	Endothelial -> Fibroblast (CC)	0.00354099	Endothelial -> Fibroblast	Prefrontal cortex
32	Endothelial	GABAergic	BMP6	BMPR1A_BMPR2	0.17835	3	BMP6_BMPR1A_BMPR2	BMP6 - (BMPR1A+BMPR2)	BMP	Secreted Signaling	KEGG: hsa04350; PMID:26893264	Endothelial -> GABAergic (CC)	0.0036722	Endothelial -> GABAergic	Prefrontal cortex
33	Endothelial	Glutamatergic	BMP6	BMPR1A_BMPR2	0.177391	3	BMP6_BMPR1A_BMPR2	BMP6 - (BMPR1A+BMPR2)	BMP	Secreted Signaling	KEGG: hsa04350; PMID:26893264	Endothelial -> Glutamatergic (CC)	0.00356262	Endothelial -> Glutamatergic	Prefrontal cortex
1616	Fibroblast	Oligodendrocyte precursor	BMP6	BMPR1A_BMPR2	0.19093	3	BMP6_BMPR1A_BMPR2	BMP6 - (BMPR1A+BMPR2)	BMP	Secreted Signaling	KEGG: hsa04350; PMID:26893264	Fibroblast -> Oligodendrocyte precursor (Hippo)	0.00531342	Fibroblast -> Oligodendrocyte precursor	Hippocampus
1617	Endothelial	Oligodendrocyte precursor	BMP6	BMPR1A_BMPR2	0.187244	3	BMP6_BMPR1A_BMPR2	BMP6 - (BMPR1A+BMPR2)	BMP	Secreted Signaling	KEGG: hsa04350; PMID:26893264	Endothelial -> Oligodendrocyte precursor (Hippo)	0.00479282	Endothelial -> Oligodendrocyte precursor	Hippocampus
1618	Fibroblast	Newly formed oligodendrocyte	BMP6	BMPR1A_BMPR2	0.188714	3	BMP6_BMPR1A_BMPR2	BMP6 - (BMPR1A+BMPR2)	BMP	Secreted Signaling	KEGG: hsa04350; PMID:26893264	Fibroblast -> Newly formed oligodendrocyte (Hippo)	0.00499643	Fibroblast -> Newly formed oligodendrocyte	Hippocampus
1619	Endothelial	Newly formed oligodendrocyte	BMP6	BMPR1A_BMPR2	0.18511	3	BMP6_BMPR1A_BMPR2	BMP6 - (BMPR1A+BMPR2)	BMP	Secreted Signaling	KEGG: hsa04350; PMID:26893264	Endothelial -> Newly formed oligodendrocyte (Hippo)	0.00450675	Endothelial -> Newly formed oligodendrocyte	Hippocampus
1620	Fibroblast	Astrocyte	BMP6	BMPR1A_BMPR2	0.196287	3	BMP6_BMPR1A_BMPR2	BMP6 - (BMPR1A+BMPR2)	BMP	Secreted Signaling	KEGG: hsa04350; PMID:26893264	Fibroblast -> Astrocyte (Hippo)	0.00612992	Fibroblast -> Astrocyte	Hippocampus
1621	Endothelial	Astrocyte	BMP6	BMPR1A_BMPR2	0.192396	3	BMP6_BMPR1A_BMPR2	BMP6 - (BMPR1A+BMPR2)	BMP	Secreted Signaling	KEGG: hsa04350; PMID:26893264	Endothelial -> Astrocyte (Hippo)	0.00552976	Endothelial -> Astrocyte	Hippocampus
1622	Fibroblast	Vascular leptomeningeal cell	BMP6	BMPR1A_BMPR2	0.191629	3	BMP6_BMPR1A_BMPR2	BMP6 - (BMPR1A+BMPR2)	BMP	Secreted Signaling	KEGG: hsa04350; PMID:26893264	Fibroblast -> Vascular leptomeningeal cell (Hippo)	0.00541593	Fibroblast -> Vascular leptomeningeal cell	Hippocampus
1623	Endothelial	Vascular leptomeningeal cell	BMP6	BMPR1A_BMPR2	0.187916	3	BMP6_BMPR1A_BMPR2	BMP6 - (BMPR1A+BMPR2)	BMP	Secreted Signaling	KEGG: hsa04350; PMID:26893264	Endothelial -> Vascular leptomeningeal cell (Hippo)	0.00488533	Endothelial -> Vascular leptomeningeal cell	Hippocampus
1624	Fibroblast	Fibroblast	BMP6	BMPR1A_BMPR2	0.19394	3	BMP6_BMPR1A_BMPR2	BMP6 - (BMPR1A+BMPR2)	BMP	Secreted Signaling	KEGG: hsa04350; PMID:26893264	Fibroblast -> Fibroblast (Hippo)	0.00576331	Fibroblast -> Fibroblast	Hippocampus
1625	Endothelial	Fibroblast	BMP6	BMPR1A_BMPR2	0.190139	3	BMP6_BMPR1A_BMPR2	BMP6 - (BMPR1A+BMPR2)	BMP	Secreted Signaling	KEGG: hsa04350; PMID:26893264	Endothelial -> Fibroblast (Hippo)	0.00519886	Endothelial -> Fibroblast	Hippocampus
1626	Fibroblast	GABAergic	BMP6	BMPR1A_BMPR2	0.204757	3	BMP6_BMPR1A_BMPR2	BMP6 - (BMPR1A+BMPR2)	BMP	Secreted Signaling	KEGG: hsa04350; PMID:26893264	Fibroblast -> GABAergic (Hippo)	0.00756797	Fibroblast -> GABAergic	Hippocampus
1627	Endothelial	GABAergic	BMP6	BMPR1A_BMPR2	0.200532	3	BMP6_BMPR1A_BMPR2	BMP6 - (BMPR1A+BMPR2)	BMP	Secreted Signaling	KEGG: hsa04350; PMID:26893264	Endothelial -> GABAergic (Hippo)	0.00682799	Endothelial -> GABAergic	Hippocampus
1628	Fibroblast	Glutamatergic	BMP6	BMPR1A_BMPR2	0.223642	3	BMP6_BMPR1A_BMPR2	BMP6 - (BMPR1A+BMPR2)	BMP	Secreted Signaling	KEGG: hsa04350; PMID:26893264	Fibroblast -> Glutamatergic (Hippo)	0.011431	Fibroblast -> Glutamatergic	Hippocampus
1629	Endothelial	Glutamatergic	BMP6	BMPR1A_BMPR2	0.218632	3	BMP6_BMPR1A_BMPR2	BMP6 - (BMPR1A+BMPR2)	BMP	Secreted Signaling	KEGG: hsa04350; PMID:26893264	Endothelial -> Glutamatergic (Hippo)	0.0103177	Endothelial -> Glutamatergic	Hippocampus
34	Endothelial	Astrocyte	BMP6	BMPR1B_BMPR2	0.199799	3	BMP6_BMPR1B_BMPR2	BMP6 - (BMPR1B+BMPR2)	BMP	Secreted Signaling	KEGG: hsa04350; PMID:26893264	Endothelial -> Astrocyte (CC)	0.00670415	Endothelial -> Astrocyte	Prefrontal cortex
1630	Fibroblast	Astrocyte	BMP6	BMPR1B_BMPR2	0.221454	3	BMP6_BMPR1B_BMPR2	BMP6 - (BMPR1B+BMPR2)	BMP	Secreted Signaling	KEGG: hsa04350; PMID:26893264	Fibroblast -> Astrocyte (Hippo)	0.0109368	Fibroblast -> Astrocyte	Hippocampus
1631	Endothelial	Astrocyte	BMP6	BMPR1B_BMPR2	0.216535	3	BMP6_BMPR1B_BMPR2	BMP6 - (BMPR1B+BMPR2)	BMP	Secreted Signaling	KEGG: hsa04350; PMID:26893264	Endothelial -> Astrocyte (Hippo)	0.00987073	Endothelial -> Astrocyte	Hippocampus
1632	Oligodendrocyte precursor	GABAergic	BMP7	ACVR1_ACVR2A	0.146606	3	BMP7_ACVR1_ACVR2A	BMP7 - (ACVR1+ACVR2A)	BMP	Secreted Signaling	KEGG: hsa04350; PMID:26893264	Oligodendrocyte precursor -> GABAergic (Hippo)	0.00109064	Oligodendrocyte precursor -> GABAergic	Hippocampus
1633	Oligodendrocyte precursor	Glutamatergic	BMP7	ACVR1_ACVR2A	0.190736	3	BMP7_ACVR1_ACVR2A	BMP7 - (ACVR1+ACVR2A)	BMP	Secreted Signaling	KEGG: hsa04350; PMID:26893264	Oligodendrocyte precursor -> Glutamatergic (Hippo)	0.00528511	Oligodendrocyte precursor -> Glutamatergic	Hippocampus
35	Oligodendrocyte precursor	Fibroblast	BMP7	ACVR1_BMPR2	0.162686	3	BMP7_ACVR1_BMPR2	BMP7 - (ACVR1+BMPR2)	BMP	Secreted Signaling	KEGG: hsa04350; PMID:26893264	Oligodendrocyte precursor -> Fibroblast (CC)	0.00214029	Oligodendrocyte precursor -> Fibroblast	Prefrontal cortex
36	Oligodendrocyte precursor	Endothelial	BMP7	ACVR1_BMPR2	0.197258	3	BMP7_ACVR1_BMPR2	BMP7 - (ACVR1+BMPR2)	BMP	Secreted Signaling	KEGG: hsa04350; PMID:26893264	Oligodendrocyte precursor -> Endothelial (CC)	0.00628557	Oligodendrocyte precursor -> Endothelial	Prefrontal cortex
1634	Oligodendrocyte precursor	Endothelial	BMP7	ACVR1_BMPR2	0.207548	3	BMP7_ACVR1_BMPR2	BMP7 - (ACVR1+BMPR2)	BMP	Secreted Signaling	KEGG: hsa04350; PMID:26893264	Oligodendrocyte precursor -> Endothelial (Hippo)	0.00808163	Oligodendrocyte precursor -> Endothelial	Hippocampus
1635	Oligodendrocyte precursor	GABAergic	BMP7	ACVR1_BMPR2	0.166792	3	BMP7_ACVR1_BMPR2	BMP7 - (ACVR1+BMPR2)	BMP	Secreted Signaling	KEGG: hsa04350; PMID:26893264	Oligodendrocyte precursor -> GABAergic (Hippo)	0.00248996	Oligodendrocyte precursor -> GABAergic	Hippocampus
1636	Oligodendrocyte precursor	Glutamatergic	BMP7	ACVR1_BMPR2	0.207633	3	BMP7_ACVR1_BMPR2	BMP7 - (ACVR1+BMPR2)	BMP	Secreted Signaling	KEGG: hsa04350; PMID:26893264	Oligodendrocyte precursor -> Glutamatergic (Hippo)	0.00809756	Oligodendrocyte precursor -> Glutamatergic	Hippocampus
37	Oligodendrocyte precursor	Oligodendrocyte precursor	BMP7	BMPR1A_ACVR2A	0.164203	3	BMP7_BMPR1A_ACVR2A	BMP7 - (BMPR1A+ACVR2A)	BMP	Secreted Signaling	KEGG: hsa04350; PMID:26893264	Oligodendrocyte precursor -> Oligodendrocyte precursor (CC)	0.00226532	Oligodendrocyte precursor -> Oligodendrocyte precursor	Prefrontal cortex
38	Oligodendrocyte precursor	Newly formed oligodendrocyte	BMP7	BMPR1A_ACVR2A	0.156375	3	BMP7_BMPR1A_ACVR2A	BMP7 - (BMPR1A+ACVR2A)	BMP	Secreted Signaling	KEGG: hsa04350; PMID:26893264	Oligodendrocyte precursor -> Newly formed oligodendrocyte (CC)	0.00167008	Oligodendrocyte precursor -> Newly formed oligodendrocyte	Prefrontal cortex
39	Oligodendrocyte precursor	GABAergic	BMP7	BMPR1A_ACVR2A	0.157466	3	BMP7_BMPR1A_ACVR2A	BMP7 - (BMPR1A+ACVR2A)	BMP	Secreted Signaling	KEGG: hsa04350; PMID:26893264	Oligodendrocyte precursor -> GABAergic (CC)	0.00174575	Oligodendrocyte precursor -> GABAergic	Prefrontal cortex
40	Oligodendrocyte precursor	Glutamatergic	BMP7	BMPR1A_ACVR2A	0.157507	3	BMP7_BMPR1A_ACVR2A	BMP7 - (BMPR1A+ACVR2A)	BMP	Secreted Signaling	KEGG: hsa04350; PMID:26893264	Oligodendrocyte precursor -> Glutamatergic (CC)	0.00174861	Oligodendrocyte precursor -> Glutamatergic	Prefrontal cortex
1637	Oligodendrocyte precursor	GABAergic	BMP7	BMPR1A_ACVR2A	0.163054	3	BMP7_BMPR1A_ACVR2A	BMP7 - (BMPR1A+ACVR2A)	BMP	Secreted Signaling	KEGG: hsa04350; PMID:26893264	Oligodendrocyte precursor -> GABAergic (Hippo)	0.00217024	Oligodendrocyte precursor -> GABAergic	Hippocampus
1638	Oligodendrocyte precursor	Glutamatergic	BMP7	BMPR1A_ACVR2A	0.187906	3	BMP7_BMPR1A_ACVR2A	BMP7 - (BMPR1A+ACVR2A)	BMP	Secreted Signaling	KEGG: hsa04350; PMID:26893264	Oligodendrocyte precursor -> Glutamatergic (Hippo)	0.00488394	Oligodendrocyte precursor -> Glutamatergic	Hippocampus
41	Oligodendrocyte precursor	Microglia (PCDH9high)	BMP7	BMPR1A_BMPR2	0.171982	3	BMP7_BMPR1A_BMPR2	BMP7 - (BMPR1A+BMPR2)	BMP	Secreted Signaling	KEGG: hsa04350; PMID:26893264	Oligodendrocyte precursor -> Microglia (PCDH9high) (CC)	0.00298382	Oligodendrocyte precursor -> Microglia (PCDH9high)	Prefrontal cortex
42	Oligodendrocyte precursor	Oligodendrocyte precursor	BMP7	BMPR1A_BMPR2	0.171735	3	BMP7_BMPR1A_BMPR2	BMP7 - (BMPR1A+BMPR2)	BMP	Secreted Signaling	KEGG: hsa04350; PMID:26893264	Oligodendrocyte precursor -> Oligodendrocyte precursor (CC)	0.00295892	Oligodendrocyte precursor -> Oligodendrocyte precursor	Prefrontal cortex
43	Oligodendrocyte precursor	Newly formed oligodendrocyte	BMP7	BMPR1A_BMPR2	0.166974	3	BMP7_BMPR1A_BMPR2	BMP7 - (BMPR1A+BMPR2)	BMP	Secreted Signaling	KEGG: hsa04350; PMID:26893264	Oligodendrocyte precursor -> Newly formed oligodendrocyte (CC)	0.00250626	Oligodendrocyte precursor -> Newly formed oligodendrocyte	Prefrontal cortex
44	Oligodendrocyte precursor	Astrocyte	BMP7	BMPR1A_BMPR2	0.175618	3	BMP7_BMPR1A_BMPR2	BMP7 - (BMPR1A+BMPR2)	BMP	Secreted Signaling	KEGG: hsa04350; PMID:26893264	Oligodendrocyte precursor -> Astrocyte (CC)	0.00336549	Oligodendrocyte precursor -> Astrocyte	Prefrontal cortex
45	Oligodendrocyte precursor	Vascular leptomeningeal cell	BMP7	BMPR1A_BMPR2	0.171648	3	BMP7_BMPR1A_BMPR2	BMP7 - (BMPR1A+BMPR2)	BMP	Secreted Signaling	KEGG: hsa04350; PMID:26893264	Oligodendrocyte precursor -> Vascular leptomeningeal cell (CC)	0.0029502	Oligodendrocyte precursor -> Vascular leptomeningeal cell	Prefrontal cortex
46	Oligodendrocyte precursor	Fibroblast	BMP7	BMPR1A_BMPR2	0.177043	3	BMP7_BMPR1A_BMPR2	BMP7 - (BMPR1A+BMPR2)	BMP	Secreted Signaling	KEGG: hsa04350; PMID:26893264	Oligodendrocyte precursor -> Fibroblast (CC)	0.00352332	Oligodendrocyte precursor -> Fibroblast	Prefrontal cortex
47	Oligodendrocyte precursor	GABAergic	BMP7	BMPR1A_BMPR2	0.178191	3	BMP7_BMPR1A_BMPR2	BMP7 - (BMPR1A+BMPR2)	BMP	Secreted Signaling	KEGG: hsa04350; PMID:26893264	Oligodendrocyte precursor -> GABAergic (CC)	0.00365388	Oligodendrocyte precursor -> GABAergic	Prefrontal cortex
48	Oligodendrocyte precursor	Glutamatergic	BMP7	BMPR1A_BMPR2	0.177234	3	BMP7_BMPR1A_BMPR2	BMP7 - (BMPR1A+BMPR2)	BMP	Secreted Signaling	KEGG: hsa04350; PMID:26893264	Oligodendrocyte precursor -> Glutamatergic (CC)	0.00354485	Oligodendrocyte precursor -> Glutamatergic	Prefrontal cortex
1639	Oligodendrocyte precursor	Oligodendrocyte precursor	BMP7	BMPR1A_BMPR2	0.176576	3	BMP7_BMPR1A_BMPR2	BMP7 - (BMPR1A+BMPR2)	BMP	Secreted Signaling	KEGG: hsa04350; PMID:26893264	Oligodendrocyte precursor -> Oligodendrocyte precursor (Hippo)	0.00347111	Oligodendrocyte precursor -> Oligodendrocyte precursor	Hippocampus
1640	Oligodendrocyte precursor	Newly formed oligodendrocyte	BMP7	BMPR1A_BMPR2	0.174675	3	BMP7_BMPR1A_BMPR2	BMP7 - (BMPR1A+BMPR2)	BMP	Secreted Signaling	KEGG: hsa04350; PMID:26893264	Oligodendrocyte precursor -> Newly formed oligodendrocyte (Hippo)	0.00326367	Oligodendrocyte precursor -> Newly formed oligodendrocyte	Hippocampus
1641	Oligodendrocyte precursor	Astrocyte	BMP7	BMPR1A_BMPR2	0.181158	3	BMP7_BMPR1A_BMPR2	BMP7 - (BMPR1A+BMPR2)	BMP	Secreted Signaling	KEGG: hsa04350; PMID:26893264	Oligodendrocyte precursor -> Astrocyte (Hippo)	0.00400564	Oligodendrocyte precursor -> Astrocyte	Hippocampus
1642	Oligodendrocyte precursor	Vascular leptomeningeal cell	BMP7	BMPR1A_BMPR2	0.177175	3	BMP7_BMPR1A_BMPR2	BMP7 - (BMPR1A+BMPR2)	BMP	Secreted Signaling	KEGG: hsa04350; PMID:26893264	Oligodendrocyte precursor -> Vascular leptomeningeal cell (Hippo)	0.0035382	Oligodendrocyte precursor -> Vascular leptomeningeal cell	Hippocampus
1643	Oligodendrocyte precursor	Fibroblast	BMP7	BMPR1A_BMPR2	0.179152	3	BMP7_BMPR1A_BMPR2	BMP7 - (BMPR1A+BMPR2)	BMP	Secreted Signaling	KEGG: hsa04350; PMID:26893264	Oligodendrocyte precursor -> Fibroblast (Hippo)	0.0037656	Oligodendrocyte precursor -> Fibroblast	Hippocampus
1644	Oligodendrocyte precursor	GABAergic	BMP7	BMPR1A_BMPR2	0.188366	3	BMP7_BMPR1A_BMPR2	BMP7 - (BMPR1A+BMPR2)	BMP	Secreted Signaling	KEGG: hsa04350; PMID:26893264	Oligodendrocyte precursor -> GABAergic (Hippo)	0.00494783	Oligodendrocyte precursor -> GABAergic	Hippocampus
1645	Oligodendrocyte precursor	Glutamatergic	BMP7	BMPR1A_BMPR2	0.204294	3	BMP7_BMPR1A_BMPR2	BMP7 - (BMPR1A+BMPR2)	BMP	Secreted Signaling	KEGG: hsa04350; PMID:26893264	Oligodendrocyte precursor -> Glutamatergic (Hippo)	0.00748456	Oligodendrocyte precursor -> Glutamatergic	Hippocampus
49	Oligodendrocyte precursor	Astrocyte	BMP7	BMPR1B_BMPR2	0.1996	3	BMP7_BMPR1B_BMPR2	BMP7 - (BMPR1B+BMPR2)	BMP	Secreted Signaling	KEGG: hsa04350; PMID:26893264	Oligodendrocyte precursor -> Astrocyte (CC)	0.0066708	Oligodendrocyte precursor -> Astrocyte	Prefrontal cortex
1646	Oligodendrocyte precursor	Astrocyte	BMP7	BMPR1B_BMPR2	0.202453	3	BMP7_BMPR1B_BMPR2	BMP7 - (BMPR1B+BMPR2)	BMP	Secreted Signaling	KEGG: hsa04350; PMID:26893264	Oligodendrocyte precursor -> Astrocyte (Hippo)	0.00715876	Oligodendrocyte precursor -> Astrocyte	Hippocampus
278	Microglia (PCDH9high)	Microglia (PCDH9high)	C3	ITGAM_ITGB2	0.241797	3	C3_ITGAM_ITGB2	C3 - (ITGAM+ITGB2)	COMPLEMENT	Secreted Signaling	PMID: 16234578	Microglia (PCDH9high) -> Microglia (PCDH9high) (CC)	0.0159916	Microglia (PCDH9high) -> Microglia (PCDH9high)	Prefrontal cortex
279	Microglia	Microglia (PCDH9high)	C3	ITGAM_ITGB2	0.238228	3	C3_ITGAM_ITGB2	C3 - (ITGAM+ITGB2)	COMPLEMENT	Secreted Signaling	PMID: 16234578	Microglia -> Microglia (PCDH9high) (CC)	0.0150307	Microglia -> Microglia (PCDH9high)	Prefrontal cortex
280	Microglia (PCDH9high)	Microglia	C3	ITGAM_ITGB2	0.2458	3	C3_ITGAM_ITGB2	C3 - (ITGAM+ITGB2)	COMPLEMENT	Secreted Signaling	PMID: 16234578	Microglia (PCDH9high) -> Microglia (CC)	0.0171056	Microglia (PCDH9high) -> Microglia	Prefrontal cortex
281	Microglia	Microglia	C3	ITGAM_ITGB2	0.242116	3	C3_ITGAM_ITGB2	C3 - (ITGAM+ITGB2)	COMPLEMENT	Secreted Signaling	PMID: 16234578	Microglia -> Microglia (CC)	0.0160789	Microglia -> Microglia	Prefrontal cortex
282	Microglia (PCDH9high)	Microglia (PCDH9high)	C3	ITGAX_ITGB2	0.253331	3	C3_ITGAX_ITGB2	C3 - (ITGAX+ITGB2)	COMPLEMENT	Secreted Signaling	PMID: 16234578	Microglia (PCDH9high) -> Microglia (PCDH9high) (CC)	0.0193046	Microglia (PCDH9high) -> Microglia (PCDH9high)	Prefrontal cortex
283	Microglia	Microglia (PCDH9high)	C3	ITGAX_ITGB2	0.249428	3	C3_ITGAX_ITGB2	C3 - (ITGAX+ITGB2)	COMPLEMENT	Secreted Signaling	PMID: 16234578	Microglia -> Microglia (PCDH9high) (CC)	0.0181484	Microglia -> Microglia (PCDH9high)	Prefrontal cortex
284	Microglia (PCDH9high)	Microglia	C3	ITGAX_ITGB2	0.261089	3	C3_ITGAX_ITGB2	C3 - (ITGAX+ITGB2)	COMPLEMENT	Secreted Signaling	PMID: 16234578	Microglia (PCDH9high) -> Microglia (CC)	0.0217072	Microglia (PCDH9high) -> Microglia	Prefrontal cortex
285	Microglia	Microglia	C3	ITGAX_ITGB2	0.256955	3	C3_ITGAX_ITGB2	C3 - (ITGAX+ITGB2)	COMPLEMENT	Secreted Signaling	PMID: 16234578	Microglia -> Microglia (CC)	0.02041	Microglia -> Microglia	Prefrontal cortex
919	Oligodendrocyte precursor	Oligodendrocyte precursor	CADM1	CADM1	0.516016	3	CADM1_CADM1	CADM1 - CADM1	CADM	Cell-Cell Contact	PMID: 24503895	Oligodendrocyte precursor -> Oligodendrocyte precursor (CC)	0.144003	Oligodendrocyte precursor -> Oligodendrocyte precursor	Prefrontal cortex
920	Oligodendrocyte	Oligodendrocyte precursor	CADM1	CADM1	0.484668	3	CADM1_CADM1	CADM1 - CADM1	CADM	Cell-Cell Contact	PMID: 24503895	Oligodendrocyte -> Oligodendrocyte precursor (CC)	0.127038	Oligodendrocyte -> Oligodendrocyte precursor	Prefrontal cortex
921	Newly formed oligodendrocyte	Oligodendrocyte precursor	CADM1	CADM1	0.624117	3	CADM1_CADM1	CADM1 - CADM1	CADM	Cell-Cell Contact	PMID: 24503895	Newly formed oligodendrocyte -> Oligodendrocyte precursor (CC)	0.20144	Newly formed oligodendrocyte -> Oligodendrocyte precursor	Prefrontal cortex
922	Astrocyte	Oligodendrocyte precursor	CADM1	CADM1	0.604607	3	CADM1_CADM1	CADM1 - CADM1	CADM	Cell-Cell Contact	PMID: 24503895	Astrocyte -> Oligodendrocyte precursor (CC)	0.191289	Astrocyte -> Oligodendrocyte precursor	Prefrontal cortex
923	GABAergic	Oligodendrocyte precursor	CADM1	CADM1	0.425301	3	CADM1_CADM1	CADM1 - CADM1	CADM	Cell-Cell Contact	PMID: 24503895	GABAergic -> Oligodendrocyte precursor (CC)	0.0952476	GABAergic -> Oligodendrocyte precursor	Prefrontal cortex
924	Glutamatergic	Oligodendrocyte precursor	CADM1	CADM1	0.450222	3	CADM1_CADM1	CADM1 - CADM1	CADM	Cell-Cell Contact	PMID: 24503895	Glutamatergic -> Oligodendrocyte precursor (CC)	0.108487	Glutamatergic -> Oligodendrocyte precursor	Prefrontal cortex
925	Oligodendrocyte precursor	Oligodendrocyte	CADM1	CADM1	0.484668	3	CADM1_CADM1	CADM1 - CADM1	CADM	Cell-Cell Contact	PMID: 24503895	Oligodendrocyte precursor -> Oligodendrocyte (CC)	0.127038	Oligodendrocyte precursor -> Oligodendrocyte	Prefrontal cortex
926	Oligodendrocyte	Oligodendrocyte	CADM1	CADM1	0.456424	3	CADM1_CADM1	CADM1 - CADM1	CADM	Cell-Cell Contact	PMID: 24503895	Oligodendrocyte -> Oligodendrocyte (CC)	0.111811	Oligodendrocyte -> Oligodendrocyte	Prefrontal cortex
927	Newly formed oligodendrocyte	Oligodendrocyte	CADM1	CADM1	0.581506	3	CADM1_CADM1	CADM1 - CADM1	CADM	Cell-Cell Contact	PMID: 24503895	Newly formed oligodendrocyte -> Oligodendrocyte (CC)	0.179125	Newly formed oligodendrocyte -> Oligodendrocyte	Prefrontal cortex
928	Astrocyte	Oligodendrocyte	CADM1	CADM1	0.564085	3	CADM1_CADM1	CADM1 - CADM1	CADM	Cell-Cell Contact	PMID: 24503895	Astrocyte -> Oligodendrocyte (CC)	0.16986	Astrocyte -> Oligodendrocyte	Prefrontal cortex
929	GABAergic	Oligodendrocyte	CADM1	CADM1	0.402689	3	CADM1_CADM1	CADM1 - CADM1	CADM	Cell-Cell Contact	PMID: 24503895	GABAergic -> Oligodendrocyte (CC)	0.0834667	GABAergic -> Oligodendrocyte	Prefrontal cortex
930	Glutamatergic	Oligodendrocyte	CADM1	CADM1	0.425288	3	CADM1_CADM1	CADM1 - CADM1	CADM	Cell-Cell Contact	PMID: 24503895	Glutamatergic -> Oligodendrocyte (CC)	0.0952407	Glutamatergic -> Oligodendrocyte	Prefrontal cortex
931	Oligodendrocyte precursor	Newly formed oligodendrocyte	CADM1	CADM1	0.624117	3	CADM1_CADM1	CADM1 - CADM1	CADM	Cell-Cell Contact	PMID: 24503895	Oligodendrocyte precursor -> Newly formed oligodendrocyte (CC)	0.20144	Oligodendrocyte precursor -> Newly formed oligodendrocyte	Prefrontal cortex
932	Oligodendrocyte	Newly formed oligodendrocyte	CADM1	CADM1	0.581506	3	CADM1_CADM1	CADM1 - CADM1	CADM	Cell-Cell Contact	PMID: 24503895	Oligodendrocyte -> Newly formed oligodendrocyte (CC)	0.179125	Oligodendrocyte -> Newly formed oligodendrocyte	Prefrontal cortex
933	Newly formed oligodendrocyte	Newly formed oligodendrocyte	CADM1	CADM1	0.773386	3	CADM1_CADM1	CADM1 - CADM1	CADM	Cell-Cell Contact	PMID: 24503895	Newly formed oligodendrocyte -> Newly formed oligodendrocyte (CC)	0.274442	Newly formed oligodendrocyte -> Newly formed oligodendrocyte	Prefrontal cortex
934	Astrocyte	Newly formed oligodendrocyte	CADM1	CADM1	0.746211	3	CADM1_CADM1	CADM1 - CADM1	CADM	Cell-Cell Contact	PMID: 24503895	Astrocyte -> Newly formed oligodendrocyte (CC)	0.261819	Astrocyte -> Newly formed oligodendrocyte	Prefrontal cortex
935	GABAergic	Newly formed oligodendrocyte	CADM1	CADM1	0.501848	3	CADM1_CADM1	CADM1 - CADM1	CADM	Cell-Cell Contact	PMID: 24503895	GABAergic -> Newly formed oligodendrocyte (CC)	0.136336	GABAergic -> Newly formed oligodendrocyte	Prefrontal cortex
936	Glutamatergic	Newly formed oligodendrocyte	CADM1	CADM1	0.535108	3	CADM1_CADM1	CADM1 - CADM1	CADM	Cell-Cell Contact	PMID: 24503895	Glutamatergic -> Newly formed oligodendrocyte (CC)	0.154312	Glutamatergic -> Newly formed oligodendrocyte	Prefrontal cortex
937	Oligodendrocyte precursor	Astrocyte	CADM1	CADM1	0.604607	3	CADM1_CADM1	CADM1 - CADM1	CADM	Cell-Cell Contact	PMID: 24503895	Oligodendrocyte precursor -> Astrocyte (CC)	0.191289	Oligodendrocyte precursor -> Astrocyte	Prefrontal cortex
938	Oligodendrocyte	Astrocyte	CADM1	CADM1	0.564085	3	CADM1_CADM1	CADM1 - CADM1	CADM	Cell-Cell Contact	PMID: 24503895	Oligodendrocyte -> Astrocyte (CC)	0.16986	Oligodendrocyte -> Astrocyte	Prefrontal cortex
939	Newly formed oligodendrocyte	Astrocyte	CADM1	CADM1	0.746211	3	CADM1_CADM1	CADM1 - CADM1	CADM	Cell-Cell Contact	PMID: 24503895	Newly formed oligodendrocyte -> Astrocyte (CC)	0.261819	Newly formed oligodendrocyte -> Astrocyte	Prefrontal cortex
940	Astrocyte	Astrocyte	CADM1	CADM1	0.720466	3	CADM1_CADM1	CADM1 - CADM1	CADM	Cell-Cell Contact	PMID: 24503895	Astrocyte -> Astrocyte (CC)	0.249577	Astrocyte -> Astrocyte	Prefrontal cortex
941	GABAergic	Astrocyte	CADM1	CADM1	0.488176	3	CADM1_CADM1	CADM1 - CADM1	CADM	Cell-Cell Contact	PMID: 24503895	GABAergic -> Astrocyte (CC)	0.128936	GABAergic -> Astrocyte	Prefrontal cortex
942	Glutamatergic	Astrocyte	CADM1	CADM1	0.519898	3	CADM1_CADM1	CADM1 - CADM1	CADM	Cell-Cell Contact	PMID: 24503895	Glutamatergic -> Astrocyte (CC)	0.146101	Glutamatergic -> Astrocyte	Prefrontal cortex
943	Oligodendrocyte precursor	GABAergic	CADM1	CADM1	0.425301	3	CADM1_CADM1	CADM1 - CADM1	CADM	Cell-Cell Contact	PMID: 24503895	Oligodendrocyte precursor -> GABAergic (CC)	0.0952476	Oligodendrocyte precursor -> GABAergic	Prefrontal cortex
944	Oligodendrocyte	GABAergic	CADM1	CADM1	0.402689	3	CADM1_CADM1	CADM1 - CADM1	CADM	Cell-Cell Contact	PMID: 24503895	Oligodendrocyte -> GABAergic (CC)	0.0834667	Oligodendrocyte -> GABAergic	Prefrontal cortex
945	Newly formed oligodendrocyte	GABAergic	CADM1	CADM1	0.501848	3	CADM1_CADM1	CADM1 - CADM1	CADM	Cell-Cell Contact	PMID: 24503895	Newly formed oligodendrocyte -> GABAergic (CC)	0.136336	Newly formed oligodendrocyte -> GABAergic	Prefrontal cortex
946	Astrocyte	GABAergic	CADM1	CADM1	0.488176	3	CADM1_CADM1	CADM1 - CADM1	CADM	Cell-Cell Contact	PMID: 24503895	Astrocyte -> GABAergic (CC)	0.128936	Astrocyte -> GABAergic	Prefrontal cortex
947	Oligodendrocyte precursor	Glutamatergic	CADM1	CADM1	0.450222	3	CADM1_CADM1	CADM1 - CADM1	CADM	Cell-Cell Contact	PMID: 24503895	Oligodendrocyte precursor -> Glutamatergic (CC)	0.108487	Oligodendrocyte precursor -> Glutamatergic	Prefrontal cortex
948	Oligodendrocyte	Glutamatergic	CADM1	CADM1	0.425288	3	CADM1_CADM1	CADM1 - CADM1	CADM	Cell-Cell Contact	PMID: 24503895	Oligodendrocyte -> Glutamatergic (CC)	0.0952407	Oligodendrocyte -> Glutamatergic	Prefrontal cortex
949	Newly formed oligodendrocyte	Glutamatergic	CADM1	CADM1	0.535108	3	CADM1_CADM1	CADM1 - CADM1	CADM	Cell-Cell Contact	PMID: 24503895	Newly formed oligodendrocyte -> Glutamatergic (CC)	0.154312	Newly formed oligodendrocyte -> Glutamatergic	Prefrontal cortex
950	Astrocyte	Glutamatergic	CADM1	CADM1	0.519898	3	CADM1_CADM1	CADM1 - CADM1	CADM	Cell-Cell Contact	PMID: 24503895	Astrocyte -> Glutamatergic (CC)	0.146101	Astrocyte -> Glutamatergic	Prefrontal cortex
951	Glutamatergic	Glutamatergic	CADM1	CADM1	0.397691	3	CADM1_CADM1	CADM1 - CADM1	CADM	Cell-Cell Contact	PMID: 24503895	Glutamatergic -> Glutamatergic (CC)	0.0809023	Glutamatergic -> Glutamatergic	Prefrontal cortex
2665	Oligodendrocyte precursor	Microglia (PCDH9high)	CADM1	CADM1	0.429237	3	CADM1_CADM1	CADM1 - CADM1	CADM	Cell-Cell Contact	PMID: 24503895	Oligodendrocyte precursor -> Microglia (PCDH9high) (Hippo)	0.0973236	Oligodendrocyte precursor -> Microglia (PCDH9high)	Hippocampus
2666	Oligodendrocyte	Microglia (PCDH9high)	CADM1	CADM1	0.39366	3	CADM1_CADM1	CADM1 - CADM1	CADM	Cell-Cell Contact	PMID: 24503895	Oligodendrocyte -> Microglia (PCDH9high) (Hippo)	0.0788455	Oligodendrocyte -> Microglia (PCDH9high)	Hippocampus
2667	Newly formed oligodendrocyte	Microglia (PCDH9high)	CADM1	CADM1	0.516749	3	CADM1_CADM1	CADM1 - CADM1	CADM	Cell-Cell Contact	PMID: 24503895	Newly formed oligodendrocyte -> Microglia (PCDH9high) (Hippo)	0.144399	Newly formed oligodendrocyte -> Microglia (PCDH9high)	Hippocampus
2668	Astrocyte	Microglia (PCDH9high)	CADM1	CADM1	0.452188	3	CADM1_CADM1	CADM1 - CADM1	CADM	Cell-Cell Contact	PMID: 24503895	Astrocyte -> Microglia (PCDH9high) (Hippo)	0.10954	Astrocyte -> Microglia (PCDH9high)	Hippocampus
2669	GABAergic	Microglia (PCDH9high)	CADM1	CADM1	0.403183	3	CADM1_CADM1	CADM1 - CADM1	CADM	Cell-Cell Contact	PMID: 24503895	GABAergic -> Microglia (PCDH9high) (Hippo)	0.083721	GABAergic -> Microglia (PCDH9high)	Hippocampus
2670	Glutamatergic	Microglia (PCDH9high)	CADM1	CADM1	0.39597	3	CADM1_CADM1	CADM1 - CADM1	CADM	Cell-Cell Contact	PMID: 24503895	Glutamatergic -> Microglia (PCDH9high) (Hippo)	0.080023	Glutamatergic -> Microglia (PCDH9high)	Hippocampus
2671	Microglia (PCDH9high)	Oligodendrocyte precursor	CADM1	CADM1	0.429237	3	CADM1_CADM1	CADM1 - CADM1	CADM	Cell-Cell Contact	PMID: 24503895	Microglia (PCDH9high) -> Oligodendrocyte precursor (Hippo)	0.0973236	Microglia (PCDH9high) -> Oligodendrocyte precursor	Hippocampus
2672	Oligodendrocyte precursor	Oligodendrocyte precursor	CADM1	CADM1	0.491917	3	CADM1_CADM1	CADM1 - CADM1	CADM	Cell-Cell Contact	PMID: 24503895	Oligodendrocyte precursor -> Oligodendrocyte precursor (Hippo)	0.13096	Oligodendrocyte precursor -> Oligodendrocyte precursor	Hippocampus
2673	Oligodendrocyte	Oligodendrocyte precursor	CADM1	CADM1	0.447164	3	CADM1_CADM1	CADM1 - CADM1	CADM	Cell-Cell Contact	PMID: 24503895	Oligodendrocyte -> Oligodendrocyte precursor (Hippo)	0.106852	Oligodendrocyte -> Oligodendrocyte precursor	Hippocampus
2674	Newly formed oligodendrocyte	Oligodendrocyte precursor	CADM1	CADM1	0.603796	3	CADM1_CADM1	CADM1 - CADM1	CADM	Cell-Cell Contact	PMID: 24503895	Newly formed oligodendrocyte -> Oligodendrocyte precursor (Hippo)	0.190865	Newly formed oligodendrocyte -> Oligodendrocyte precursor	Hippocampus
2675	Astrocyte	Oligodendrocyte precursor	CADM1	CADM1	0.521028	3	CADM1_CADM1	CADM1 - CADM1	CADM	Cell-Cell Contact	PMID: 24503895	Astrocyte -> Oligodendrocyte precursor (Hippo)	0.146712	Astrocyte -> Oligodendrocyte precursor	Hippocampus
2676	GABAergic	Oligodendrocyte precursor	CADM1	CADM1	0.459096	3	CADM1_CADM1	CADM1 - CADM1	CADM	Cell-Cell Contact	PMID: 24503895	GABAergic -> Oligodendrocyte precursor (Hippo)	0.113246	GABAergic -> Oligodendrocyte precursor	Hippocampus
2677	Glutamatergic	Oligodendrocyte precursor	CADM1	CADM1	0.450056	3	CADM1_CADM1	CADM1 - CADM1	CADM	Cell-Cell Contact	PMID: 24503895	Glutamatergic -> Oligodendrocyte precursor (Hippo)	0.108398	Glutamatergic -> Oligodendrocyte precursor	Hippocampus
2678	Microglia (PCDH9high)	Oligodendrocyte	CADM1	CADM1	0.39366	3	CADM1_CADM1	CADM1 - CADM1	CADM	Cell-Cell Contact	PMID: 24503895	Microglia (PCDH9high) -> Oligodendrocyte (Hippo)	0.0788455	Microglia (PCDH9high) -> Oligodendrocyte	Hippocampus
2679	Oligodendrocyte precursor	Oligodendrocyte	CADM1	CADM1	0.447164	3	CADM1_CADM1	CADM1 - CADM1	CADM	Cell-Cell Contact	PMID: 24503895	Oligodendrocyte precursor -> Oligodendrocyte (Hippo)	0.106852	Oligodendrocyte precursor -> Oligodendrocyte	Hippocampus
2680	Oligodendrocyte	Oligodendrocyte	CADM1	CADM1	0.409022	3	CADM1_CADM1	CADM1 - CADM1	CADM	Cell-Cell Contact	PMID: 24503895	Oligodendrocyte -> Oligodendrocyte (Hippo)	0.0867384	Oligodendrocyte -> Oligodendrocyte	Hippocampus
2681	Newly formed oligodendrocyte	Oligodendrocyte	CADM1	CADM1	0.541457	3	CADM1_CADM1	CADM1 - CADM1	CADM	Cell-Cell Contact	PMID: 24503895	Newly formed oligodendrocyte -> Oligodendrocyte (Hippo)	0.15773	Newly formed oligodendrocyte -> Oligodendrocyte	Hippocampus
2682	Astrocyte	Oligodendrocyte	CADM1	CADM1	0.471834	3	CADM1_CADM1	CADM1 - CADM1	CADM	Cell-Cell Contact	PMID: 24503895	Astrocyte -> Oligodendrocyte (Hippo)	0.120105	Astrocyte -> Oligodendrocyte	Hippocampus
2683	GABAergic	Oligodendrocyte	CADM1	CADM1	0.419219	3	CADM1_CADM1	CADM1 - CADM1	CADM	Cell-Cell Contact	PMID: 24503895	GABAergic -> Oligodendrocyte (Hippo)	0.0920531	GABAergic -> Oligodendrocyte	Hippocampus
2684	Glutamatergic	Oligodendrocyte	CADM1	CADM1	0.411495	3	CADM1_CADM1	CADM1 - CADM1	CADM	Cell-Cell Contact	PMID: 24503895	Glutamatergic -> Oligodendrocyte (Hippo)	0.0880225	Glutamatergic -> Oligodendrocyte	Hippocampus
2685	Microglia (PCDH9high)	Newly formed oligodendrocyte	CADM1	CADM1	0.516749	3	CADM1_CADM1	CADM1 - CADM1	CADM	Cell-Cell Contact	PMID: 24503895	Microglia (PCDH9high) -> Newly formed oligodendrocyte (Hippo)	0.144399	Microglia (PCDH9high) -> Newly formed oligodendrocyte	Hippocampus
2686	Oligodendrocyte precursor	Newly formed oligodendrocyte	CADM1	CADM1	0.603796	3	CADM1_CADM1	CADM1 - CADM1	CADM	Cell-Cell Contact	PMID: 24503895	Oligodendrocyte precursor -> Newly formed oligodendrocyte (Hippo)	0.190865	Oligodendrocyte precursor -> Newly formed oligodendrocyte	Hippocampus
2687	Oligodendrocyte	Newly formed oligodendrocyte	CADM1	CADM1	0.541457	3	CADM1_CADM1	CADM1 - CADM1	CADM	Cell-Cell Contact	PMID: 24503895	Oligodendrocyte -> Newly formed oligodendrocyte (Hippo)	0.15773	Oligodendrocyte -> Newly formed oligodendrocyte	Hippocampus
2688	Newly formed oligodendrocyte	Newly formed oligodendrocyte	CADM1	CADM1	0.763033	3	CADM1_CADM1	CADM1 - CADM1	CADM	Cell-Cell Contact	PMID: 24503895	Newly formed oligodendrocyte -> Newly formed oligodendrocyte (Hippo)	0.269669	Newly formed oligodendrocyte -> Newly formed oligodendrocyte	Hippocampus
2689	Astrocyte	Newly formed oligodendrocyte	CADM1	CADM1	0.644801	3	CADM1_CADM1	CADM1 - CADM1	CADM	Cell-Cell Contact	PMID: 24503895	Astrocyte -> Newly formed oligodendrocyte (Hippo)	0.212064	Astrocyte -> Newly formed oligodendrocyte	Hippocampus
2690	GABAergic	Newly formed oligodendrocyte	CADM1	CADM1	0.557989	3	CADM1_CADM1	CADM1 - CADM1	CADM	Cell-Cell Contact	PMID: 24503895	GABAergic -> Newly formed oligodendrocyte (Hippo)	0.166601	GABAergic -> Newly formed oligodendrocyte	Hippocampus
2691	Glutamatergic	Newly formed oligodendrocyte	CADM1	CADM1	0.545458	3	CADM1_CADM1	CADM1 - CADM1	CADM	Cell-Cell Contact	PMID: 24503895	Glutamatergic -> Newly formed oligodendrocyte (Hippo)	0.159881	Glutamatergic -> Newly formed oligodendrocyte	Hippocampus
2692	Microglia (PCDH9high)	Astrocyte	CADM1	CADM1	0.452188	3	CADM1_CADM1	CADM1 - CADM1	CADM	Cell-Cell Contact	PMID: 24503895	Microglia (PCDH9high) -> Astrocyte (Hippo)	0.10954	Microglia (PCDH9high) -> Astrocyte	Hippocampus
2693	Oligodendrocyte precursor	Astrocyte	CADM1	CADM1	0.521028	3	CADM1_CADM1	CADM1 - CADM1	CADM	Cell-Cell Contact	PMID: 24503895	Oligodendrocyte precursor -> Astrocyte (Hippo)	0.146712	Oligodendrocyte precursor -> Astrocyte	Hippocampus
2694	Oligodendrocyte	Astrocyte	CADM1	CADM1	0.471834	3	CADM1_CADM1	CADM1 - CADM1	CADM	Cell-Cell Contact	PMID: 24503895	Oligodendrocyte -> Astrocyte (Hippo)	0.120105	Oligodendrocyte -> Astrocyte	Hippocampus
2695	Newly formed oligodendrocyte	Astrocyte	CADM1	CADM1	0.644801	3	CADM1_CADM1	CADM1 - CADM1	CADM	Cell-Cell Contact	PMID: 24503895	Newly formed oligodendrocyte -> Astrocyte (Hippo)	0.212064	Newly formed oligodendrocyte -> Astrocyte	Hippocampus
2696	Astrocyte	Astrocyte	CADM1	CADM1	0.553134	3	CADM1_CADM1	CADM1 - CADM1	CADM	Cell-Cell Contact	PMID: 24503895	Astrocyte -> Astrocyte (Hippo)	0.164001	Astrocyte -> Astrocyte	Hippocampus
2697	GABAergic	Astrocyte	CADM1	CADM1	0.484929	3	CADM1_CADM1	CADM1 - CADM1	CADM	Cell-Cell Contact	PMID: 24503895	GABAergic -> Astrocyte (Hippo)	0.127179	GABAergic -> Astrocyte	Hippocampus
2698	Glutamatergic	Astrocyte	CADM1	CADM1	0.475006	3	CADM1_CADM1	CADM1 - CADM1	CADM	Cell-Cell Contact	PMID: 24503895	Glutamatergic -> Astrocyte (Hippo)	0.121817	Glutamatergic -> Astrocyte	Hippocampus
2699	Microglia (PCDH9high)	GABAergic	CADM1	CADM1	0.403183	3	CADM1_CADM1	CADM1 - CADM1	CADM	Cell-Cell Contact	PMID: 24503895	Microglia (PCDH9high) -> GABAergic (Hippo)	0.083721	Microglia (PCDH9high) -> GABAergic	Hippocampus
2700	Oligodendrocyte precursor	GABAergic	CADM1	CADM1	0.459096	3	CADM1_CADM1	CADM1 - CADM1	CADM	Cell-Cell Contact	PMID: 24503895	Oligodendrocyte precursor -> GABAergic (Hippo)	0.113246	Oligodendrocyte precursor -> GABAergic	Hippocampus
2701	Oligodendrocyte	GABAergic	CADM1	CADM1	0.419219	3	CADM1_CADM1	CADM1 - CADM1	CADM	Cell-Cell Contact	PMID: 24503895	Oligodendrocyte -> GABAergic (Hippo)	0.0920531	Oligodendrocyte -> GABAergic	Hippocampus
2702	Newly formed oligodendrocyte	GABAergic	CADM1	CADM1	0.557989	3	CADM1_CADM1	CADM1 - CADM1	CADM	Cell-Cell Contact	PMID: 24503895	Newly formed oligodendrocyte -> GABAergic (Hippo)	0.166601	Newly formed oligodendrocyte -> GABAergic	Hippocampus
2703	Astrocyte	GABAergic	CADM1	CADM1	0.484929	3	CADM1_CADM1	CADM1 - CADM1	CADM	Cell-Cell Contact	PMID: 24503895	Astrocyte -> GABAergic (Hippo)	0.127179	Astrocyte -> GABAergic	Hippocampus
2704	GABAergic	GABAergic	CADM1	CADM1	0.429872	3	CADM1_CADM1	CADM1 - CADM1	CADM	Cell-Cell Contact	PMID: 24503895	GABAergic -> GABAergic (Hippo)	0.0976587	GABAergic -> GABAergic	Hippocampus
2705	Glutamatergic	GABAergic	CADM1	CADM1	0.421802	3	CADM1_CADM1	CADM1 - CADM1	CADM	Cell-Cell Contact	PMID: 24503895	Glutamatergic -> GABAergic (Hippo)	0.0934079	Glutamatergic -> GABAergic	Hippocampus
2706	Microglia (PCDH9high)	Glutamatergic	CADM1	CADM1	0.39597	3	CADM1_CADM1	CADM1 - CADM1	CADM	Cell-Cell Contact	PMID: 24503895	Microglia (PCDH9high) -> Glutamatergic (Hippo)	0.080023	Microglia (PCDH9high) -> Glutamatergic	Hippocampus
2707	Oligodendrocyte precursor	Glutamatergic	CADM1	CADM1	0.450056	3	CADM1_CADM1	CADM1 - CADM1	CADM	Cell-Cell Contact	PMID: 24503895	Oligodendrocyte precursor -> Glutamatergic (Hippo)	0.108398	Oligodendrocyte precursor -> Glutamatergic	Hippocampus
2708	Oligodendrocyte	Glutamatergic	CADM1	CADM1	0.411495	3	CADM1_CADM1	CADM1 - CADM1	CADM	Cell-Cell Contact	PMID: 24503895	Oligodendrocyte -> Glutamatergic (Hippo)	0.0880225	Oligodendrocyte -> Glutamatergic	Hippocampus
2709	Newly formed oligodendrocyte	Glutamatergic	CADM1	CADM1	0.545458	3	CADM1_CADM1	CADM1 - CADM1	CADM	Cell-Cell Contact	PMID: 24503895	Newly formed oligodendrocyte -> Glutamatergic (Hippo)	0.159881	Newly formed oligodendrocyte -> Glutamatergic	Hippocampus
2710	Astrocyte	Glutamatergic	CADM1	CADM1	0.475006	3	CADM1_CADM1	CADM1 - CADM1	CADM	Cell-Cell Contact	PMID: 24503895	Astrocyte -> Glutamatergic (Hippo)	0.121817	Astrocyte -> Glutamatergic	Hippocampus
2711	GABAergic	Glutamatergic	CADM1	CADM1	0.421802	3	CADM1_CADM1	CADM1 - CADM1	CADM	Cell-Cell Contact	PMID: 24503895	GABAergic -> Glutamatergic (Hippo)	0.0934079	GABAergic -> Glutamatergic	Hippocampus
2712	Glutamatergic	Glutamatergic	CADM1	CADM1	0.413995	3	CADM1_CADM1	CADM1 - CADM1	CADM	Cell-Cell Contact	PMID: 24503895	Glutamatergic -> Glutamatergic (Hippo)	0.0893238	Glutamatergic -> Glutamatergic	Hippocampus
952	GABAergic	GABAergic	CADM3	CADM3	0.157965	3	CADM3_CADM3	CADM3 - CADM3	CADM	Cell-Cell Contact	KEGG: hsa04514	GABAergic -> GABAergic (CC)	0.0017811	GABAergic -> GABAergic	Prefrontal cortex
953	Glutamatergic	GABAergic	CADM3	CADM3	0.179767	3	CADM3_CADM3	CADM3 - CADM3	CADM	Cell-Cell Contact	KEGG: hsa04514	Glutamatergic -> GABAergic (CC)	0.00383813	Glutamatergic -> GABAergic	Prefrontal cortex
954	Glutamatergic(Pyr)	GABAergic	CADM3	CADM3	0.175606	3	CADM3_CADM3	CADM3 - CADM3	CADM	Cell-Cell Contact	KEGG: hsa04514	Glutamatergic(Pyr) -> GABAergic (CC)	0.00336421	Glutamatergic(Pyr) -> GABAergic	Prefrontal cortex
955	GABAergic	Glutamatergic	CADM3	CADM3	0.179767	3	CADM3_CADM3	CADM3 - CADM3	CADM	Cell-Cell Contact	KEGG: hsa04514	GABAergic -> Glutamatergic (CC)	0.00383813	GABAergic -> Glutamatergic	Prefrontal cortex
956	Glutamatergic	Glutamatergic	CADM3	CADM3	0.208447	3	CADM3_CADM3	CADM3 - CADM3	CADM	Cell-Cell Contact	KEGG: hsa04514	Glutamatergic -> Glutamatergic (CC)	0.00825125	Glutamatergic -> Glutamatergic	Prefrontal cortex
957	Glutamatergic(Pyr)	Glutamatergic	CADM3	CADM3	0.202896	3	CADM3_CADM3	CADM3 - CADM3	CADM	Cell-Cell Contact	KEGG: hsa04514	Glutamatergic(Pyr) -> Glutamatergic (CC)	0.00723636	Glutamatergic(Pyr) -> Glutamatergic	Prefrontal cortex
958	GABAergic	Glutamatergic(Pyr)	CADM3	CADM3	0.175606	3	CADM3_CADM3	CADM3 - CADM3	CADM	Cell-Cell Contact	KEGG: hsa04514	GABAergic -> Glutamatergic(Pyr) (CC)	0.00336421	GABAergic -> Glutamatergic(Pyr)	Prefrontal cortex
959	Glutamatergic	Glutamatergic(Pyr)	CADM3	CADM3	0.202896	3	CADM3_CADM3	CADM3 - CADM3	CADM	Cell-Cell Contact	KEGG: hsa04514	Glutamatergic -> Glutamatergic(Pyr) (CC)	0.00723636	Glutamatergic -> Glutamatergic(Pyr)	Prefrontal cortex
960	Glutamatergic(Pyr)	Glutamatergic(Pyr)	CADM3	CADM3	0.197628	3	CADM3_CADM3	CADM3 - CADM3	CADM	Cell-Cell Contact	KEGG: hsa04514	Glutamatergic(Pyr) -> Glutamatergic(Pyr) (CC)	0.0063455	Glutamatergic(Pyr) -> Glutamatergic(Pyr)	Prefrontal cortex
2713	GABAergic	GABAergic	CADM3	CADM3	0.14843	3	CADM3_CADM3	CADM3 - CADM3	CADM	Cell-Cell Contact	KEGG: hsa04514	GABAergic -> GABAergic (Hippo)	0.00118598	GABAergic -> GABAergic	Hippocampus
2714	Glutamatergic	GABAergic	CADM3	CADM3	0.146358	3	CADM3_CADM3	CADM3 - CADM3	CADM	Cell-Cell Contact	KEGG: hsa04514	Glutamatergic -> GABAergic (Hippo)	0.00107809	Glutamatergic -> GABAergic	Hippocampus
2715	GABAergic	Glutamatergic	CADM3	CADM3	0.146358	3	CADM3_CADM3	CADM3 - CADM3	CADM	Cell-Cell Contact	KEGG: hsa04514	GABAergic -> Glutamatergic (Hippo)	0.00107809	GABAergic -> Glutamatergic	Hippocampus
2716	Glutamatergic	Glutamatergic	CADM3	CADM3	0.144343	3	CADM3_CADM3	CADM3 - CADM3	CADM	Cell-Cell Contact	KEGG: hsa04514	Glutamatergic -> Glutamatergic (Hippo)	0.000980006	Glutamatergic -> Glutamatergic	Hippocampus
961	Microglia (PCDH9high)	Microglia (PCDH9high)	CD22	PTPRC	0.238574	3	CD22_PTPRC	CD22 - PTPRC	CD22	Cell-Cell Contact	KEGG: hsa04514	Microglia (PCDH9high) -> Microglia (PCDH9high) (CC)	0.0151225	Microglia (PCDH9high) -> Microglia (PCDH9high)	Prefrontal cortex
962	Oligodendrocyte	Microglia (PCDH9high)	CD22	PTPRC	0.282045	3	CD22_PTPRC	CD22 - PTPRC	CD22	Cell-Cell Contact	KEGG: hsa04514	Oligodendrocyte -> Microglia (PCDH9high) (CC)	0.0288533	Oligodendrocyte -> Microglia (PCDH9high)	Prefrontal cortex
963	Microglia (PCDH9high)	Microglia	CD22	PTPRC	0.235674	3	CD22_PTPRC	CD22 - PTPRC	CD22	Cell-Cell Contact	KEGG: hsa04514	Microglia (PCDH9high) -> Microglia (CC)	0.0143622	Microglia (PCDH9high) -> Microglia	Prefrontal cortex
964	Oligodendrocyte	Microglia	CD22	PTPRC	0.278055	3	CD22_PTPRC	CD22 - PTPRC	CD22	Cell-Cell Contact	KEGG: hsa04514	Oligodendrocyte -> Microglia (CC)	0.027422	Oligodendrocyte -> Microglia	Prefrontal cortex
2717	Microglia (PCDH9high)	Microglia (PCDH9high)	CD22	PTPRC	0.195823	3	CD22_PTPRC	CD22 - PTPRC	CD22	Cell-Cell Contact	KEGG: hsa04514	Microglia (PCDH9high) -> Microglia (PCDH9high) (Hippo)	0.00605629	Microglia (PCDH9high) -> Microglia (PCDH9high)	Hippocampus
2718	Oligodendrocyte	Microglia (PCDH9high)	CD22	PTPRC	0.200653	3	CD22_PTPRC	CD22 - PTPRC	CD22	Cell-Cell Contact	KEGG: hsa04514	Oligodendrocyte -> Microglia (PCDH9high) (Hippo)	0.00684842	Oligodendrocyte -> Microglia (PCDH9high)	Hippocampus
2719	Newly formed oligodendrocyte	Microglia (PCDH9high)	CD22	PTPRC	0.170788	3	CD22_PTPRC	CD22 - PTPRC	CD22	Cell-Cell Contact	KEGG: hsa04514	Newly formed oligodendrocyte -> Microglia (PCDH9high) (Hippo)	0.00286492	Newly formed oligodendrocyte -> Microglia (PCDH9high)	Hippocampus
2720	Microglia (PCDH9high)	Microglia	CD22	PTPRC	0.251745	3	CD22_PTPRC	CD22 - PTPRC	CD22	Cell-Cell Contact	KEGG: hsa04514	Microglia (PCDH9high) -> Microglia (Hippo)	0.0188307	Microglia (PCDH9high) -> Microglia	Hippocampus
2721	Oligodendrocyte	Microglia	CD22	PTPRC	0.259671	3	CD22_PTPRC	CD22 - PTPRC	CD22	Cell-Cell Contact	KEGG: hsa04514	Oligodendrocyte -> Microglia (Hippo)	0.0212579	Oligodendrocyte -> Microglia	Hippocampus
2722	Newly formed oligodendrocyte	Microglia	CD22	PTPRC	0.212133	3	CD22_PTPRC	CD22 - PTPRC	CD22	Cell-Cell Contact	KEGG: hsa04514	Newly formed oligodendrocyte -> Microglia (Hippo)	0.00896857	Newly formed oligodendrocyte -> Microglia	Hippocampus
973	Microglia (PCDH9high)	Vascular leptomeningeal cell	CD46	JAG1	0.183357	3	CD46_JAG1	CD46 - JAG1	CD46	Cell-Cell Contact	PMID: 23086448	Microglia (PCDH9high) -> Vascular leptomeningeal cell (CC)	0.00427982	Microglia (PCDH9high) -> Vascular leptomeningeal cell	Prefrontal cortex
974	Oligodendrocyte precursor	Vascular leptomeningeal cell	CD46	JAG1	0.179894	3	CD46_JAG1	CD46 - JAG1	CD46	Cell-Cell Contact	PMID: 23086448	Oligodendrocyte precursor -> Vascular leptomeningeal cell (CC)	0.00385333	Oligodendrocyte precursor -> Vascular leptomeningeal cell	Prefrontal cortex
975	Oligodendrocyte	Vascular leptomeningeal cell	CD46	JAG1	0.180698	3	CD46_JAG1	CD46 - JAG1	CD46	Cell-Cell Contact	PMID: 23086448	Oligodendrocyte -> Vascular leptomeningeal cell (CC)	0.0039498	Oligodendrocyte -> Vascular leptomeningeal cell	Prefrontal cortex
976	Newly formed oligodendrocyte	Vascular leptomeningeal cell	CD46	JAG1	0.180446	3	CD46_JAG1	CD46 - JAG1	CD46	Cell-Cell Contact	PMID: 23086448	Newly formed oligodendrocyte -> Vascular leptomeningeal cell (CC)	0.00391938	Newly formed oligodendrocyte -> Vascular leptomeningeal cell	Prefrontal cortex
977	Endothelial	Vascular leptomeningeal cell	CD46	JAG1	0.204542	3	CD46_JAG1	CD46 - JAG1	CD46	Cell-Cell Contact	PMID: 23086448	Endothelial -> Vascular leptomeningeal cell (CC)	0.00752917	Endothelial -> Vascular leptomeningeal cell	Prefrontal cortex
978	GABAergic	Vascular leptomeningeal cell	CD46	JAG1	0.160141	3	CD46_JAG1	CD46 - JAG1	CD46	Cell-Cell Contact	PMID: 23086448	GABAergic -> Vascular leptomeningeal cell (CC)	0.00194109	GABAergic -> Vascular leptomeningeal cell	Prefrontal cortex
979	Glutamatergic	Vascular leptomeningeal cell	CD46	JAG1	0.162753	3	CD46_JAG1	CD46 - JAG1	CD46	Cell-Cell Contact	PMID: 23086448	Glutamatergic -> Vascular leptomeningeal cell (CC)	0.00214572	Glutamatergic -> Vascular leptomeningeal cell	Prefrontal cortex
2733	Oligodendrocyte precursor	Vascular leptomeningeal cell	CD46	JAG1	0.175808	3	CD46_JAG1	CD46 - JAG1	CD46	Cell-Cell Contact	PMID: 23086448	Oligodendrocyte precursor -> Vascular leptomeningeal cell (Hippo)	0.00338629	Oligodendrocyte precursor -> Vascular leptomeningeal cell	Hippocampus
2734	Newly formed oligodendrocyte	Vascular leptomeningeal cell	CD46	JAG1	0.178882	3	CD46_JAG1	CD46 - JAG1	CD46	Cell-Cell Contact	PMID: 23086448	Newly formed oligodendrocyte -> Vascular leptomeningeal cell (Hippo)	0.00373396	Newly formed oligodendrocyte -> Vascular leptomeningeal cell	Hippocampus
2735	Endothelial	Vascular leptomeningeal cell	CD46	JAG1	0.243543	3	CD46_JAG1	CD46 - JAG1	CD46	Cell-Cell Contact	PMID: 23086448	Endothelial -> Vascular leptomeningeal cell (Hippo)	0.0164727	Endothelial -> Vascular leptomeningeal cell	Hippocampus
2736	GABAergic	Vascular leptomeningeal cell	CD46	JAG1	0.178109	3	CD46_JAG1	CD46 - JAG1	CD46	Cell-Cell Contact	PMID: 23086448	GABAergic -> Vascular leptomeningeal cell (Hippo)	0.00364453	GABAergic -> Vascular leptomeningeal cell	Hippocampus
2737	Glutamatergic	Vascular leptomeningeal cell	CD46	JAG1	0.174131	3	CD46_JAG1	CD46 - JAG1	CD46	Cell-Cell Contact	PMID: 23086448	Glutamatergic -> Vascular leptomeningeal cell (Hippo)	0.00320572	Glutamatergic -> Vascular leptomeningeal cell	Hippocampus
2738	Oligodendrocyte precursor	Endothelial	CD46	JAG1	0.136131	3	CD46_JAG1	CD46 - JAG1	CD46	Cell-Cell Contact	PMID: 23086448	Oligodendrocyte precursor -> Endothelial (Hippo)	0.00064525	Oligodendrocyte precursor -> Endothelial	Hippocampus
2739	Newly formed oligodendrocyte	Endothelial	CD46	JAG1	0.137972	3	CD46_JAG1	CD46 - JAG1	CD46	Cell-Cell Contact	PMID: 23086448	Newly formed oligodendrocyte -> Endothelial (Hippo)	0.000711698	Newly formed oligodendrocyte -> Endothelial	Hippocampus
2740	Endothelial	Endothelial	CD46	JAG1	0.173816	3	CD46_JAG1	CD46 - JAG1	CD46	Cell-Cell Contact	PMID: 23086448	Endothelial -> Endothelial (Hippo)	0.00317256	Endothelial -> Endothelial	Hippocampus
2741	GABAergic	Endothelial	CD46	JAG1	0.137511	3	CD46_JAG1	CD46 - JAG1	CD46	Cell-Cell Contact	PMID: 23086448	GABAergic -> Endothelial (Hippo)	0.000694603	GABAergic -> Endothelial	Hippocampus
2742	Glutamatergic	Endothelial	CD46	JAG1	0.13512	3	CD46_JAG1	CD46 - JAG1	CD46	Cell-Cell Contact	PMID: 23086448	Glutamatergic -> Endothelial (Hippo)	0.000610754	Glutamatergic -> Endothelial	Hippocampus
2743	Oligodendrocyte precursor	Glutamatergic	CD46	JAG1	0.145613	3	CD46_JAG1	CD46 - JAG1	CD46	Cell-Cell Contact	PMID: 23086448	Oligodendrocyte precursor -> Glutamatergic (Hippo)	0.00104108	Oligodendrocyte precursor -> Glutamatergic	Hippocampus
2744	Newly formed oligodendrocyte	Glutamatergic	CD46	JAG1	0.147721	3	CD46_JAG1	CD46 - JAG1	CD46	Cell-Cell Contact	PMID: 23086448	Newly formed oligodendrocyte -> Glutamatergic (Hippo)	0.00114824	Newly formed oligodendrocyte -> Glutamatergic	Hippocampus
2745	Endothelial	Glutamatergic	CD46	JAG1	0.189524	3	CD46_JAG1	CD46 - JAG1	CD46	Cell-Cell Contact	PMID: 23086448	Endothelial -> Glutamatergic (Hippo)	0.00511085	Endothelial -> Glutamatergic	Hippocampus
2746	GABAergic	Glutamatergic	CD46	JAG1	0.147193	3	CD46_JAG1	CD46 - JAG1	CD46	Cell-Cell Contact	PMID: 23086448	GABAergic -> Glutamatergic (Hippo)	0.00112068	GABAergic -> Glutamatergic	Hippocampus
2747	Glutamatergic	Glutamatergic	CD46	JAG1	0.144458	3	CD46_JAG1	CD46 - JAG1	CD46	Cell-Cell Contact	PMID: 23086448	Glutamatergic -> Glutamatergic (Hippo)	0.000985443	Glutamatergic -> Glutamatergic	Hippocampus
2748	Endothelial	Endothelial	CD99	CD99	0.122281	3	CD99_CD99	CD99 - CD99	CD99	Cell-Cell Contact	KEGG: hsa04514	Endothelial -> Endothelial (Hippo)	0.00028079	Endothelial -> Endothelial	Hippocampus
2749	Endothelial	Glutamatergic	CD99	CD99L2	0.122565	3	CD99_CD99L2	CD99 - CD99L2	CD99	Cell-Cell Contact	KEGG: hsa04514	Endothelial -> Glutamatergic (Hippo)	0.000286161	Endothelial -> Glutamatergic	Hippocampus
989	Oligodendrocyte precursor	Oligodendrocyte precursor	CDH2	CDH2	0.279958	3	CDH2_CDH2	CDH2 - CDH2	CDH	Cell-Cell Contact	KEGG: hsa04514	Oligodendrocyte precursor -> Oligodendrocyte precursor (CC)	0.0281007	Oligodendrocyte precursor -> Oligodendrocyte precursor	Prefrontal cortex
990	Newly formed oligodendrocyte	Oligodendrocyte precursor	CDH2	CDH2	0.280588	3	CDH2_CDH2	CDH2 - CDH2	CDH	Cell-Cell Contact	KEGG: hsa04514	Newly formed oligodendrocyte -> Oligodendrocyte precursor (CC)	0.028327	Newly formed oligodendrocyte -> Oligodendrocyte precursor	Prefrontal cortex
991	Astrocyte	Oligodendrocyte precursor	CDH2	CDH2	0.295954	3	CDH2_CDH2	CDH2 - CDH2	CDH	Cell-Cell Contact	KEGG: hsa04514	Astrocyte -> Oligodendrocyte precursor (CC)	0.0340847	Astrocyte -> Oligodendrocyte precursor	Prefrontal cortex
992	Endothelial	Oligodendrocyte precursor	CDH2	CDH2	0.228991	3	CDH2_CDH2	CDH2 - CDH2	CDH	Cell-Cell Contact	KEGG: hsa04514	Endothelial -> Oligodendrocyte precursor (CC)	0.0126894	Endothelial -> Oligodendrocyte precursor	Prefrontal cortex
993	GABAergic	Oligodendrocyte precursor	CDH2	CDH2	0.266376	3	CDH2_CDH2	CDH2 - CDH2	CDH	Cell-Cell Contact	KEGG: hsa04514	GABAergic -> Oligodendrocyte precursor (CC)	0.0234219	GABAergic -> Oligodendrocyte precursor	Prefrontal cortex
994	Glutamatergic	Oligodendrocyte precursor	CDH2	CDH2	0.306931	3	CDH2_CDH2	CDH2 - CDH2	CDH	Cell-Cell Contact	KEGG: hsa04514	Glutamatergic -> Oligodendrocyte precursor (CC)	0.0384629	Glutamatergic -> Oligodendrocyte precursor	Prefrontal cortex
995	Oligodendrocyte precursor	Newly formed oligodendrocyte	CDH2	CDH2	0.280588	3	CDH2_CDH2	CDH2 - CDH2	CDH	Cell-Cell Contact	KEGG: hsa04514	Oligodendrocyte precursor -> Newly formed oligodendrocyte (CC)	0.028327	Oligodendrocyte precursor -> Newly formed oligodendrocyte	Prefrontal cortex
996	Newly formed oligodendrocyte	Newly formed oligodendrocyte	CDH2	CDH2	0.281221	3	CDH2_CDH2	CDH2 - CDH2	CDH	Cell-Cell Contact	KEGG: hsa04514	Newly formed oligodendrocyte -> Newly formed oligodendrocyte (CC)	0.028555	Newly formed oligodendrocyte -> Newly formed oligodendrocyte	Prefrontal cortex
997	Astrocyte	Newly formed oligodendrocyte	CDH2	CDH2	0.296654	3	CDH2_CDH2	CDH2 - CDH2	CDH	Cell-Cell Contact	KEGG: hsa04514	Astrocyte -> Newly formed oligodendrocyte (CC)	0.0343575	Astrocyte -> Newly formed oligodendrocyte	Prefrontal cortex
998	Endothelial	Newly formed oligodendrocyte	CDH2	CDH2	0.229419	3	CDH2_CDH2	CDH2 - CDH2	CDH	Cell-Cell Contact	KEGG: hsa04514	Endothelial -> Newly formed oligodendrocyte (CC)	0.0127932	Endothelial -> Newly formed oligodendrocyte	Prefrontal cortex
999	GABAergic	Newly formed oligodendrocyte	CDH2	CDH2	0.26695	3	CDH2_CDH2	CDH2 - CDH2	CDH	Cell-Cell Contact	KEGG: hsa04514	GABAergic -> Newly formed oligodendrocyte (CC)	0.0236114	GABAergic -> Newly formed oligodendrocyte	Prefrontal cortex
1000	Glutamatergic	Newly formed oligodendrocyte	CDH2	CDH2	0.30768	3	CDH2_CDH2	CDH2 - CDH2	CDH	Cell-Cell Contact	KEGG: hsa04514	Glutamatergic -> Newly formed oligodendrocyte (CC)	0.0387692	Glutamatergic -> Newly formed oligodendrocyte	Prefrontal cortex
1001	Oligodendrocyte precursor	Astrocyte	CDH2	CDH2	0.295954	3	CDH2_CDH2	CDH2 - CDH2	CDH	Cell-Cell Contact	KEGG: hsa04514	Oligodendrocyte precursor -> Astrocyte (CC)	0.0340847	Oligodendrocyte precursor -> Astrocyte	Prefrontal cortex
1002	Newly formed oligodendrocyte	Astrocyte	CDH2	CDH2	0.296654	3	CDH2_CDH2	CDH2 - CDH2	CDH	Cell-Cell Contact	KEGG: hsa04514	Newly formed oligodendrocyte -> Astrocyte (CC)	0.0343575	Newly formed oligodendrocyte -> Astrocyte	Prefrontal cortex
1003	Astrocyte	Astrocyte	CDH2	CDH2	0.313759	3	CDH2_CDH2	CDH2 - CDH2	CDH	Cell-Cell Contact	KEGG: hsa04514	Astrocyte -> Astrocyte (CC)	0.0412889	Astrocyte -> Astrocyte	Prefrontal cortex
1004	Endothelial	Astrocyte	CDH2	CDH2	0.239777	3	CDH2_CDH2	CDH2 - CDH2	CDH	Cell-Cell Contact	KEGG: hsa04514	Endothelial -> Astrocyte (CC)	0.0154438	Endothelial -> Astrocyte	Prefrontal cortex
1005	GABAergic	Astrocyte	CDH2	CDH2	0.280899	3	CDH2_CDH2	CDH2 - CDH2	CDH	Cell-Cell Contact	KEGG: hsa04514	GABAergic -> Astrocyte (CC)	0.0284387	GABAergic -> Astrocyte	Prefrontal cortex
1006	Glutamatergic	Astrocyte	CDH2	CDH2	0.326022	3	CDH2_CDH2	CDH2 - CDH2	CDH	Cell-Cell Contact	KEGG: hsa04514	Glutamatergic -> Astrocyte (CC)	0.0465478	Glutamatergic -> Astrocyte	Prefrontal cortex
1007	Oligodendrocyte precursor	Endothelial	CDH2	CDH2	0.228991	3	CDH2_CDH2	CDH2 - CDH2	CDH	Cell-Cell Contact	KEGG: hsa04514	Oligodendrocyte precursor -> Endothelial (CC)	0.0126894	Oligodendrocyte precursor -> Endothelial	Prefrontal cortex
1008	Newly formed oligodendrocyte	Endothelial	CDH2	CDH2	0.229419	3	CDH2_CDH2	CDH2 - CDH2	CDH	Cell-Cell Contact	KEGG: hsa04514	Newly formed oligodendrocyte -> Endothelial (CC)	0.0127932	Newly formed oligodendrocyte -> Endothelial	Prefrontal cortex
1009	Astrocyte	Endothelial	CDH2	CDH2	0.239777	3	CDH2_CDH2	CDH2 - CDH2	CDH	Cell-Cell Contact	KEGG: hsa04514	Astrocyte -> Endothelial (CC)	0.0154438	Astrocyte -> Endothelial	Prefrontal cortex
1010	GABAergic	Endothelial	CDH2	CDH2	0.219696	3	CDH2_CDH2	CDH2 - CDH2	CDH	Cell-Cell Contact	KEGG: hsa04514	GABAergic -> Endothelial (CC)	0.0105488	GABAergic -> Endothelial	Prefrontal cortex
1011	Glutamatergic	Endothelial	CDH2	CDH2	0.247083	3	CDH2_CDH2	CDH2 - CDH2	CDH	Cell-Cell Contact	KEGG: hsa04514	Glutamatergic -> Endothelial (CC)	0.0174708	Glutamatergic -> Endothelial	Prefrontal cortex
1012	Oligodendrocyte precursor	GABAergic	CDH2	CDH2	0.266376	3	CDH2_CDH2	CDH2 - CDH2	CDH	Cell-Cell Contact	KEGG: hsa04514	Oligodendrocyte precursor -> GABAergic (CC)	0.0234219	Oligodendrocyte precursor -> GABAergic	Prefrontal cortex
1013	Newly formed oligodendrocyte	GABAergic	CDH2	CDH2	0.26695	3	CDH2_CDH2	CDH2 - CDH2	CDH	Cell-Cell Contact	KEGG: hsa04514	Newly formed oligodendrocyte -> GABAergic (CC)	0.0236114	Newly formed oligodendrocyte -> GABAergic	Prefrontal cortex
1014	Astrocyte	GABAergic	CDH2	CDH2	0.280899	3	CDH2_CDH2	CDH2 - CDH2	CDH	Cell-Cell Contact	KEGG: hsa04514	Astrocyte -> GABAergic (CC)	0.0284387	Astrocyte -> GABAergic	Prefrontal cortex
1015	Endothelial	GABAergic	CDH2	CDH2	0.219696	3	CDH2_CDH2	CDH2 - CDH2	CDH	Cell-Cell Contact	KEGG: hsa04514	Endothelial -> GABAergic (CC)	0.0105488	Endothelial -> GABAergic	Prefrontal cortex
1016	GABAergic	GABAergic	CDH2	CDH2	0.254	3	CDH2_CDH2	CDH2 - CDH2	CDH	Cell-Cell Contact	KEGG: hsa04514	GABAergic -> GABAergic (CC)	0.0195064	GABAergic -> GABAergic	Prefrontal cortex
1017	Glutamatergic	GABAergic	CDH2	CDH2	0.290832	3	CDH2_CDH2	CDH2 - CDH2	CDH	Cell-Cell Contact	KEGG: hsa04514	Glutamatergic -> GABAergic (CC)	0.0321157	Glutamatergic -> GABAergic	Prefrontal cortex
1018	Oligodendrocyte precursor	Glutamatergic	CDH2	CDH2	0.306931	3	CDH2_CDH2	CDH2 - CDH2	CDH	Cell-Cell Contact	KEGG: hsa04514	Oligodendrocyte precursor -> Glutamatergic (CC)	0.0384629	Oligodendrocyte precursor -> Glutamatergic	Prefrontal cortex
1019	Newly formed oligodendrocyte	Glutamatergic	CDH2	CDH2	0.30768	3	CDH2_CDH2	CDH2 - CDH2	CDH	Cell-Cell Contact	KEGG: hsa04514	Newly formed oligodendrocyte -> Glutamatergic (CC)	0.0387692	Newly formed oligodendrocyte -> Glutamatergic	Prefrontal cortex
1020	Astrocyte	Glutamatergic	CDH2	CDH2	0.326022	3	CDH2_CDH2	CDH2 - CDH2	CDH	Cell-Cell Contact	KEGG: hsa04514	Astrocyte -> Glutamatergic (CC)	0.0465478	Astrocyte -> Glutamatergic	Prefrontal cortex
1021	Endothelial	Glutamatergic	CDH2	CDH2	0.247083	3	CDH2_CDH2	CDH2 - CDH2	CDH	Cell-Cell Contact	KEGG: hsa04514	Endothelial -> Glutamatergic (CC)	0.0174708	Endothelial -> Glutamatergic	Prefrontal cortex
1022	GABAergic	Glutamatergic	CDH2	CDH2	0.290832	3	CDH2_CDH2	CDH2 - CDH2	CDH	Cell-Cell Contact	KEGG: hsa04514	GABAergic -> Glutamatergic (CC)	0.0321157	GABAergic -> Glutamatergic	Prefrontal cortex
1023	Glutamatergic	Glutamatergic	CDH2	CDH2	0.339203	3	CDH2_CDH2	CDH2 - CDH2	CDH	Cell-Cell Contact	KEGG: hsa04514	Glutamatergic -> Glutamatergic (CC)	0.0524399	Glutamatergic -> Glutamatergic	Prefrontal cortex
2766	Oligodendrocyte precursor	Oligodendrocyte precursor	CDH2	CDH2	0.197512	3	CDH2_CDH2	CDH2 - CDH2	CDH	Cell-Cell Contact	KEGG: hsa04514	Oligodendrocyte precursor -> Oligodendrocyte precursor (Hippo)	0.00632668	Oligodendrocyte precursor -> Oligodendrocyte precursor	Hippocampus
2767	Newly formed oligodendrocyte	Oligodendrocyte precursor	CDH2	CDH2	0.190827	3	CDH2_CDH2	CDH2 - CDH2	CDH	Cell-Cell Contact	KEGG: hsa04514	Newly formed oligodendrocyte -> Oligodendrocyte precursor (Hippo)	0.00529838	Newly formed oligodendrocyte -> Oligodendrocyte precursor	Hippocampus
2768	Astrocyte	Oligodendrocyte precursor	CDH2	CDH2	0.197794	3	CDH2_CDH2	CDH2 - CDH2	CDH	Cell-Cell Contact	KEGG: hsa04514	Astrocyte -> Oligodendrocyte precursor (Hippo)	0.00637251	Astrocyte -> Oligodendrocyte precursor	Hippocampus
2769	Endothelial	Oligodendrocyte precursor	CDH2	CDH2	0.188528	3	CDH2_CDH2	CDH2 - CDH2	CDH	Cell-Cell Contact	KEGG: hsa04514	Endothelial -> Oligodendrocyte precursor (Hippo)	0.00497036	Endothelial -> Oligodendrocyte precursor	Hippocampus
2770	GABAergic	Oligodendrocyte precursor	CDH2	CDH2	0.226538	3	CDH2_CDH2	CDH2 - CDH2	CDH	Cell-Cell Contact	KEGG: hsa04514	GABAergic -> Oligodendrocyte precursor (Hippo)	0.0121034	GABAergic -> Oligodendrocyte precursor	Hippocampus
2771	Glutamatergic	Oligodendrocyte precursor	CDH2	CDH2	0.242746	3	CDH2_CDH2	CDH2 - CDH2	CDH	Cell-Cell Contact	KEGG: hsa04514	Glutamatergic -> Oligodendrocyte precursor (Hippo)	0.0162521	Glutamatergic -> Oligodendrocyte precursor	Hippocampus
2772	Oligodendrocyte precursor	Newly formed oligodendrocyte	CDH2	CDH2	0.190827	3	CDH2_CDH2	CDH2 - CDH2	CDH	Cell-Cell Contact	KEGG: hsa04514	Oligodendrocyte precursor -> Newly formed oligodendrocyte (Hippo)	0.00529838	Oligodendrocyte precursor -> Newly formed oligodendrocyte	Hippocampus
2773	Astrocyte	Newly formed oligodendrocyte	CDH2	CDH2	0.19109	3	CDH2_CDH2	CDH2 - CDH2	CDH	Cell-Cell Contact	KEGG: hsa04514	Astrocyte -> Newly formed oligodendrocyte (Hippo)	0.00533681	Astrocyte -> Newly formed oligodendrocyte	Hippocampus
2774	GABAergic	Newly formed oligodendrocyte	CDH2	CDH2	0.217832	3	CDH2_CDH2	CDH2 - CDH2	CDH	Cell-Cell Contact	KEGG: hsa04514	GABAergic -> Newly formed oligodendrocyte (Hippo)	0.0101458	GABAergic -> Newly formed oligodendrocyte	Hippocampus
2775	Glutamatergic	Newly formed oligodendrocyte	CDH2	CDH2	0.232813	3	CDH2_CDH2	CDH2 - CDH2	CDH	Cell-Cell Contact	KEGG: hsa04514	Glutamatergic -> Newly formed oligodendrocyte (Hippo)	0.0136327	Glutamatergic -> Newly formed oligodendrocyte	Hippocampus
2776	Oligodendrocyte precursor	Astrocyte	CDH2	CDH2	0.197794	3	CDH2_CDH2	CDH2 - CDH2	CDH	Cell-Cell Contact	KEGG: hsa04514	Oligodendrocyte precursor -> Astrocyte (Hippo)	0.00637251	Oligodendrocyte precursor -> Astrocyte	Hippocampus
2777	Newly formed oligodendrocyte	Astrocyte	CDH2	CDH2	0.19109	3	CDH2_CDH2	CDH2 - CDH2	CDH	Cell-Cell Contact	KEGG: hsa04514	Newly formed oligodendrocyte -> Astrocyte (Hippo)	0.00533681	Newly formed oligodendrocyte -> Astrocyte	Hippocampus
2778	Astrocyte	Astrocyte	CDH2	CDH2	0.198077	3	CDH2_CDH2	CDH2 - CDH2	CDH	Cell-Cell Contact	KEGG: hsa04514	Astrocyte -> Astrocyte (Hippo)	0.00641868	Astrocyte -> Astrocyte	Hippocampus
2779	Endothelial	Astrocyte	CDH2	CDH2	0.188785	3	CDH2_CDH2	CDH2 - CDH2	CDH	Cell-Cell Contact	KEGG: hsa04514	Endothelial -> Astrocyte (Hippo)	0.00500641	Endothelial -> Astrocyte	Hippocampus
2780	GABAergic	Astrocyte	CDH2	CDH2	0.226907	3	CDH2_CDH2	CDH2 - CDH2	CDH	Cell-Cell Contact	KEGG: hsa04514	GABAergic -> Astrocyte (Hippo)	0.0121906	GABAergic -> Astrocyte	Hippocampus
2781	Glutamatergic	Astrocyte	CDH2	CDH2	0.243168	3	CDH2_CDH2	CDH2 - CDH2	CDH	Cell-Cell Contact	KEGG: hsa04514	Glutamatergic -> Astrocyte (Hippo)	0.0163686	Glutamatergic -> Astrocyte	Hippocampus
2782	Oligodendrocyte precursor	Endothelial	CDH2	CDH2	0.188528	3	CDH2_CDH2	CDH2 - CDH2	CDH	Cell-Cell Contact	KEGG: hsa04514	Oligodendrocyte precursor -> Endothelial (Hippo)	0.00497036	Oligodendrocyte precursor -> Endothelial	Hippocampus
2783	Astrocyte	Endothelial	CDH2	CDH2	0.188785	3	CDH2_CDH2	CDH2 - CDH2	CDH	Cell-Cell Contact	KEGG: hsa04514	Astrocyte -> Endothelial (Hippo)	0.00500641	Astrocyte -> Endothelial	Hippocampus
2784	GABAergic	Endothelial	CDH2	CDH2	0.214855	3	CDH2_CDH2	CDH2 - CDH2	CDH	Cell-Cell Contact	KEGG: hsa04514	GABAergic -> Endothelial (Hippo)	0.00952055	GABAergic -> Endothelial	Hippocampus
2785	Glutamatergic	Endothelial	CDH2	CDH2	0.229427	3	CDH2_CDH2	CDH2 - CDH2	CDH	Cell-Cell Contact	KEGG: hsa04514	Glutamatergic -> Endothelial (Hippo)	0.0127953	Glutamatergic -> Endothelial	Hippocampus
2786	Oligodendrocyte precursor	GABAergic	CDH2	CDH2	0.226538	3	CDH2_CDH2	CDH2 - CDH2	CDH	Cell-Cell Contact	KEGG: hsa04514	Oligodendrocyte precursor -> GABAergic (Hippo)	0.0121034	Oligodendrocyte precursor -> GABAergic	Hippocampus
2787	Newly formed oligodendrocyte	GABAergic	CDH2	CDH2	0.217832	3	CDH2_CDH2	CDH2 - CDH2	CDH	Cell-Cell Contact	KEGG: hsa04514	Newly formed oligodendrocyte -> GABAergic (Hippo)	0.0101458	Newly formed oligodendrocyte -> GABAergic	Hippocampus
2788	Astrocyte	GABAergic	CDH2	CDH2	0.226907	3	CDH2_CDH2	CDH2 - CDH2	CDH	Cell-Cell Contact	KEGG: hsa04514	Astrocyte -> GABAergic (Hippo)	0.0121906	Astrocyte -> GABAergic	Hippocampus
2789	Endothelial	GABAergic	CDH2	CDH2	0.214855	3	CDH2_CDH2	CDH2 - CDH2	CDH	Cell-Cell Contact	KEGG: hsa04514	Endothelial -> GABAergic (Hippo)	0.00952055	Endothelial -> GABAergic	Hippocampus
2790	GABAergic	GABAergic	CDH2	CDH2	0.265193	3	CDH2_CDH2	CDH2 - CDH2	CDH	Cell-Cell Contact	KEGG: hsa04514	GABAergic -> GABAergic (Hippo)	0.0230326	GABAergic -> GABAergic	Hippocampus
2791	Glutamatergic	GABAergic	CDH2	CDH2	0.287365	3	CDH2_CDH2	CDH2 - CDH2	CDH	Cell-Cell Contact	KEGG: hsa04514	Glutamatergic -> GABAergic (Hippo)	0.0308105	Glutamatergic -> GABAergic	Hippocampus
2792	Oligodendrocyte precursor	Glutamatergic	CDH2	CDH2	0.242746	3	CDH2_CDH2	CDH2 - CDH2	CDH	Cell-Cell Contact	KEGG: hsa04514	Oligodendrocyte precursor -> Glutamatergic (Hippo)	0.0162521	Oligodendrocyte precursor -> Glutamatergic	Hippocampus
2793	Newly formed oligodendrocyte	Glutamatergic	CDH2	CDH2	0.232813	3	CDH2_CDH2	CDH2 - CDH2	CDH	Cell-Cell Contact	KEGG: hsa04514	Newly formed oligodendrocyte -> Glutamatergic (Hippo)	0.0136327	Newly formed oligodendrocyte -> Glutamatergic	Hippocampus
2794	Astrocyte	Glutamatergic	CDH2	CDH2	0.243168	3	CDH2_CDH2	CDH2 - CDH2	CDH	Cell-Cell Contact	KEGG: hsa04514	Astrocyte -> Glutamatergic (Hippo)	0.0163686	Astrocyte -> Glutamatergic	Hippocampus
2795	Endothelial	Glutamatergic	CDH2	CDH2	0.229427	3	CDH2_CDH2	CDH2 - CDH2	CDH	Cell-Cell Contact	KEGG: hsa04514	Endothelial -> Glutamatergic (Hippo)	0.0127953	Endothelial -> Glutamatergic	Hippocampus
2796	GABAergic	Glutamatergic	CDH2	CDH2	0.287365	3	CDH2_CDH2	CDH2 - CDH2	CDH	Cell-Cell Contact	KEGG: hsa04514	GABAergic -> Glutamatergic (Hippo)	0.0308105	GABAergic -> Glutamatergic	Hippocampus
2797	Glutamatergic	Glutamatergic	CDH2	CDH2	0.313319	3	CDH2_CDH2	CDH2 - CDH2	CDH	Cell-Cell Contact	KEGG: hsa04514	Glutamatergic -> Glutamatergic (Hippo)	0.0411044	Glutamatergic -> Glutamatergic	Hippocampus
980	Oligodendrocyte precursor	Oligodendrocyte precursor	CDH4	CDH4	0.171202	3	CDH4_CDH4	CDH4 - CDH4	CDH	Cell-Cell Contact	KEGG: hsa04514	Oligodendrocyte precursor -> Oligodendrocyte precursor (CC)	0.00290579	Oligodendrocyte precursor -> Oligodendrocyte precursor	Prefrontal cortex
981	Astrocyte	Oligodendrocyte precursor	CDH4	CDH4	0.184243	3	CDH4_CDH4	CDH4 - CDH4	CDH	Cell-Cell Contact	KEGG: hsa04514	Astrocyte -> Oligodendrocyte precursor (CC)	0.00439357	Astrocyte -> Oligodendrocyte precursor	Prefrontal cortex
982	GABAergic	Oligodendrocyte precursor	CDH4	CDH4	0.159052	3	CDH4_CDH4	CDH4 - CDH4	CDH	Cell-Cell Contact	KEGG: hsa04514	GABAergic -> Oligodendrocyte precursor (CC)	0.00185984	GABAergic -> Oligodendrocyte precursor	Prefrontal cortex
983	Oligodendrocyte precursor	Astrocyte	CDH4	CDH4	0.184243	3	CDH4_CDH4	CDH4 - CDH4	CDH	Cell-Cell Contact	KEGG: hsa04514	Oligodendrocyte precursor -> Astrocyte (CC)	0.00439357	Oligodendrocyte precursor -> Astrocyte	Prefrontal cortex
984	Astrocyte	Astrocyte	CDH4	CDH4	0.199404	3	CDH4_CDH4	CDH4 - CDH4	CDH	Cell-Cell Contact	KEGG: hsa04514	Astrocyte -> Astrocyte (CC)	0.00663803	Astrocyte -> Astrocyte	Prefrontal cortex
985	GABAergic	Astrocyte	CDH4	CDH4	0.170262	3	CDH4_CDH4	CDH4 - CDH4	CDH	Cell-Cell Contact	KEGG: hsa04514	GABAergic -> Astrocyte (CC)	0.0028136	GABAergic -> Astrocyte	Prefrontal cortex
986	Oligodendrocyte precursor	GABAergic	CDH4	CDH4	0.159052	3	CDH4_CDH4	CDH4 - CDH4	CDH	Cell-Cell Contact	KEGG: hsa04514	Oligodendrocyte precursor -> GABAergic (CC)	0.00185984	Oligodendrocyte precursor -> GABAergic	Prefrontal cortex
987	Astrocyte	GABAergic	CDH4	CDH4	0.170262	3	CDH4_CDH4	CDH4 - CDH4	CDH	Cell-Cell Contact	KEGG: hsa04514	Astrocyte -> GABAergic (CC)	0.0028136	Astrocyte -> GABAergic	Prefrontal cortex
988	GABAergic	GABAergic	CDH4	CDH4	0.148503	3	CDH4_CDH4	CDH4 - CDH4	CDH	Cell-Cell Contact	KEGG: hsa04514	GABAergic -> GABAergic (CC)	0.00118994	GABAergic -> GABAergic	Prefrontal cortex
2750	Oligodendrocyte precursor	Oligodendrocyte precursor	CDH4	CDH4	0.182362	3	CDH4_CDH4	CDH4 - CDH4	CDH	Cell-Cell Contact	KEGG: hsa04514	Oligodendrocyte precursor -> Oligodendrocyte precursor (Hippo)	0.0041544	Oligodendrocyte precursor -> Oligodendrocyte precursor	Hippocampus
2751	Astrocyte	Oligodendrocyte precursor	CDH4	CDH4	0.187793	3	CDH4_CDH4	CDH4 - CDH4	CDH	Cell-Cell Contact	KEGG: hsa04514	Astrocyte -> Oligodendrocyte precursor (Hippo)	0.00486828	Astrocyte -> Oligodendrocyte precursor	Hippocampus
2752	GABAergic	Oligodendrocyte precursor	CDH4	CDH4	0.178984	3	CDH4_CDH4	CDH4 - CDH4	CDH	Cell-Cell Contact	KEGG: hsa04514	GABAergic -> Oligodendrocyte precursor (Hippo)	0.00374585	GABAergic -> Oligodendrocyte precursor	Hippocampus
2753	Glutamatergic	Oligodendrocyte precursor	CDH4	CDH4	0.171214	3	CDH4_CDH4	CDH4 - CDH4	CDH	Cell-Cell Contact	KEGG: hsa04514	Glutamatergic -> Oligodendrocyte precursor (Hippo)	0.00290697	Glutamatergic -> Oligodendrocyte precursor	Hippocampus
2754	Oligodendrocyte precursor	Astrocyte	CDH4	CDH4	0.187793	3	CDH4_CDH4	CDH4 - CDH4	CDH	Cell-Cell Contact	KEGG: hsa04514	Oligodendrocyte precursor -> Astrocyte (Hippo)	0.00486828	Oligodendrocyte precursor -> Astrocyte	Hippocampus
2755	Astrocyte	Astrocyte	CDH4	CDH4	0.193552	3	CDH4_CDH4	CDH4 - CDH4	CDH	Cell-Cell Contact	KEGG: hsa04514	Astrocyte -> Astrocyte (Hippo)	0.00570413	Astrocyte -> Astrocyte	Hippocampus
2756	GABAergic	Astrocyte	CDH4	CDH4	0.184214	3	CDH4_CDH4	CDH4 - CDH4	CDH	Cell-Cell Contact	KEGG: hsa04514	GABAergic -> Astrocyte (Hippo)	0.00438983	GABAergic -> Astrocyte	Hippocampus
2757	Glutamatergic	Astrocyte	CDH4	CDH4	0.175999	3	CDH4_CDH4	CDH4 - CDH4	CDH	Cell-Cell Contact	KEGG: hsa04514	Glutamatergic -> Astrocyte (Hippo)	0.00340723	Glutamatergic -> Astrocyte	Hippocampus
2758	Oligodendrocyte precursor	GABAergic	CDH4	CDH4	0.178984	3	CDH4_CDH4	CDH4 - CDH4	CDH	Cell-Cell Contact	KEGG: hsa04514	Oligodendrocyte precursor -> GABAergic (Hippo)	0.00374585	Oligodendrocyte precursor -> GABAergic	Hippocampus
2759	Astrocyte	GABAergic	CDH4	CDH4	0.184214	3	CDH4_CDH4	CDH4 - CDH4	CDH	Cell-Cell Contact	KEGG: hsa04514	Astrocyte -> GABAergic (Hippo)	0.00438983	Astrocyte -> GABAergic	Hippocampus
2760	GABAergic	GABAergic	CDH4	CDH4	0.175726	3	CDH4_CDH4	CDH4 - CDH4	CDH	Cell-Cell Contact	KEGG: hsa04514	GABAergic -> GABAergic (Hippo)	0.00337734	GABAergic -> GABAergic	Hippocampus
2761	Glutamatergic	GABAergic	CDH4	CDH4	0.168229	3	CDH4_CDH4	CDH4 - CDH4	CDH	Cell-Cell Contact	KEGG: hsa04514	Glutamatergic -> GABAergic (Hippo)	0.00262077	Glutamatergic -> GABAergic	Hippocampus
2762	Oligodendrocyte precursor	Glutamatergic	CDH4	CDH4	0.171214	3	CDH4_CDH4	CDH4 - CDH4	CDH	Cell-Cell Contact	KEGG: hsa04514	Oligodendrocyte precursor -> Glutamatergic (Hippo)	0.00290697	Oligodendrocyte precursor -> Glutamatergic	Hippocampus
2763	Astrocyte	Glutamatergic	CDH4	CDH4	0.175999	3	CDH4_CDH4	CDH4 - CDH4	CDH	Cell-Cell Contact	KEGG: hsa04514	Astrocyte -> Glutamatergic (Hippo)	0.00340723	Astrocyte -> Glutamatergic	Hippocampus
2764	GABAergic	Glutamatergic	CDH4	CDH4	0.168229	3	CDH4_CDH4	CDH4 - CDH4	CDH	Cell-Cell Contact	KEGG: hsa04514	GABAergic -> Glutamatergic (Hippo)	0.00262077	GABAergic -> Glutamatergic	Hippocampus
2765	Glutamatergic	Glutamatergic	CDH4	CDH4	0.16134	3	CDH4_CDH4	CDH4 - CDH4	CDH	Cell-Cell Contact	KEGG: hsa04514	Glutamatergic -> Glutamatergic (Hippo)	0.00203334	Glutamatergic -> Glutamatergic	Hippocampus
1024	Endothelial	Endothelial	CDH5	CDH5	0.181413	3	CDH5_CDH5	CDH5 - CDH5	CDH5	Cell-Cell Contact	KEGG: hsa04514	Endothelial -> Endothelial (CC)	0.00403683	Endothelial -> Endothelial	Prefrontal cortex
2798	Endothelial	Endothelial	CDH5	CDH5	0.191331	3	CDH5_CDH5	CDH5 - CDH5	CDH5	Cell-Cell Contact	KEGG: hsa04514	Endothelial -> Endothelial (Hippo)	0.00537205	Endothelial -> Endothelial	Hippocampus
1041	Oligodendrocyte precursor	Oligodendrocyte precursor	CNTN1	NRCAM	0.655818	3	CNTN1_NRCAM	CNTN1 - NRCAM	CNTN	Cell-Cell Contact	KEGG: hsa04514	Oligodendrocyte precursor -> Oligodendrocyte precursor (CC)	0.217662	Oligodendrocyte precursor -> Oligodendrocyte precursor	Prefrontal cortex
1042	Newly formed oligodendrocyte	Oligodendrocyte precursor	CNTN1	NRCAM	0.530248	3	CNTN1_NRCAM	CNTN1 - NRCAM	CNTN	Cell-Cell Contact	KEGG: hsa04514	Newly formed oligodendrocyte -> Oligodendrocyte precursor (CC)	0.151691	Newly formed oligodendrocyte -> Oligodendrocyte precursor	Prefrontal cortex
1043	Astrocyte	Oligodendrocyte precursor	CNTN1	NRCAM	0.61295	3	CNTN1_NRCAM	CNTN1 - NRCAM	CNTN	Cell-Cell Contact	KEGG: hsa04514	Astrocyte -> Oligodendrocyte precursor (CC)	0.195645	Astrocyte -> Oligodendrocyte precursor	Prefrontal cortex
1044	GABAergic	Oligodendrocyte precursor	CNTN1	NRCAM	0.599468	3	CNTN1_NRCAM	CNTN1 - NRCAM	CNTN	Cell-Cell Contact	KEGG: hsa04514	GABAergic -> Oligodendrocyte precursor (CC)	0.188597	GABAergic -> Oligodendrocyte precursor	Prefrontal cortex
1045	Glutamatergic	Oligodendrocyte precursor	CNTN1	NRCAM	0.636044	3	CNTN1_NRCAM	CNTN1 - NRCAM	CNTN	Cell-Cell Contact	KEGG: hsa04514	Glutamatergic -> Oligodendrocyte precursor (CC)	0.207584	Glutamatergic -> Oligodendrocyte precursor	Prefrontal cortex
1046	Oligodendrocyte precursor	Newly formed oligodendrocyte	CNTN1	NRCAM	0.568001	3	CNTN1_NRCAM	CNTN1 - NRCAM	CNTN	Cell-Cell Contact	KEGG: hsa04514	Oligodendrocyte precursor -> Newly formed oligodendrocyte (CC)	0.171949	Oligodendrocyte precursor -> Newly formed oligodendrocyte	Prefrontal cortex
1047	Newly formed oligodendrocyte	Newly formed oligodendrocyte	CNTN1	NRCAM	0.467462	3	CNTN1_NRCAM	CNTN1 - NRCAM	CNTN	Cell-Cell Contact	KEGG: hsa04514	Newly formed oligodendrocyte -> Newly formed oligodendrocyte (CC)	0.117748	Newly formed oligodendrocyte -> Newly formed oligodendrocyte	Prefrontal cortex
1048	Astrocyte	Newly formed oligodendrocyte	CNTN1	NRCAM	0.533876	3	CNTN1_NRCAM	CNTN1 - NRCAM	CNTN	Cell-Cell Contact	KEGG: hsa04514	Astrocyte -> Newly formed oligodendrocyte (CC)	0.153648	Astrocyte -> Newly formed oligodendrocyte	Prefrontal cortex
1049	GABAergic	Newly formed oligodendrocyte	CNTN1	NRCAM	0.523104	3	CNTN1_NRCAM	CNTN1 - NRCAM	CNTN	Cell-Cell Contact	KEGG: hsa04514	GABAergic -> Newly formed oligodendrocyte (CC)	0.147834	GABAergic -> Newly formed oligodendrocyte	Prefrontal cortex
1050	Glutamatergic	Newly formed oligodendrocyte	CNTN1	NRCAM	0.552283	3	CNTN1_NRCAM	CNTN1 - NRCAM	CNTN	Cell-Cell Contact	KEGG: hsa04514	Glutamatergic -> Newly formed oligodendrocyte (CC)	0.163545	Glutamatergic -> Newly formed oligodendrocyte	Prefrontal cortex
1051	Oligodendrocyte precursor	Astrocyte	CNTN1	NRCAM	0.555303	3	CNTN1_NRCAM	CNTN1 - NRCAM	CNTN	Cell-Cell Contact	KEGG: hsa04514	Oligodendrocyte precursor -> Astrocyte (CC)	0.165163	Oligodendrocyte precursor -> Astrocyte	Prefrontal cortex
1052	Newly formed oligodendrocyte	Astrocyte	CNTN1	NRCAM	0.458284	3	CNTN1_NRCAM	CNTN1 - NRCAM	CNTN	Cell-Cell Contact	KEGG: hsa04514	Newly formed oligodendrocyte -> Astrocyte (CC)	0.11281	Newly formed oligodendrocyte -> Astrocyte	Prefrontal cortex
1053	Astrocyte	Astrocyte	CNTN1	NRCAM	0.522404	3	CNTN1_NRCAM	CNTN1 - NRCAM	CNTN	Cell-Cell Contact	KEGG: hsa04514	Astrocyte -> Astrocyte (CC)	0.147456	Astrocyte -> Astrocyte	Prefrontal cortex
1054	GABAergic	Astrocyte	CNTN1	NRCAM	0.512013	3	CNTN1_NRCAM	CNTN1 - NRCAM	CNTN	Cell-Cell Contact	KEGG: hsa04514	GABAergic -> Astrocyte (CC)	0.141837	GABAergic -> Astrocyte	Prefrontal cortex
1055	Glutamatergic	Astrocyte	CNTN1	NRCAM	0.540153	3	CNTN1_NRCAM	CNTN1 - NRCAM	CNTN	Cell-Cell Contact	KEGG: hsa04514	Glutamatergic -> Astrocyte (CC)	0.157028	Glutamatergic -> Astrocyte	Prefrontal cortex
1056	Oligodendrocyte precursor	GABAergic	CNTN1	NRCAM	0.442814	3	CNTN1_NRCAM	CNTN1 - NRCAM	CNTN	Cell-Cell Contact	KEGG: hsa04514	Oligodendrocyte precursor -> GABAergic (CC)	0.104529	Oligodendrocyte precursor -> GABAergic	Prefrontal cortex
1057	Newly formed oligodendrocyte	GABAergic	CNTN1	NRCAM	0.375618	2	CNTN1_NRCAM	CNTN1 - NRCAM	CNTN	Cell-Cell Contact	KEGG: hsa04514	Newly formed oligodendrocyte -> GABAergic (CC)	0.0697889	Newly formed oligodendrocyte -> GABAergic	Prefrontal cortex
1058	Astrocyte	GABAergic	CNTN1	NRCAM	0.420265	3	CNTN1_NRCAM	CNTN1 - NRCAM	CNTN	Cell-Cell Contact	KEGG: hsa04514	Astrocyte -> GABAergic (CC)	0.0926015	Astrocyte -> GABAergic	Prefrontal cortex
1059	GABAergic	GABAergic	CNTN1	NRCAM	0.413096	3	CNTN1_NRCAM	CNTN1 - NRCAM	CNTN	Cell-Cell Contact	KEGG: hsa04514	GABAergic -> GABAergic (CC)	0.0888553	GABAergic -> GABAergic	Prefrontal cortex
1060	Glutamatergic	GABAergic	CNTN1	NRCAM	0.432457	3	CNTN1_NRCAM	CNTN1 - NRCAM	CNTN	Cell-Cell Contact	KEGG: hsa04514	Glutamatergic -> GABAergic (CC)	0.0990266	Glutamatergic -> GABAergic	Prefrontal cortex
1061	Oligodendrocyte precursor	Glutamatergic	CNTN1	NRCAM	0.545711	3	CNTN1_NRCAM	CNTN1 - NRCAM	CNTN	Cell-Cell Contact	KEGG: hsa04514	Oligodendrocyte precursor -> Glutamatergic (CC)	0.160018	Oligodendrocyte precursor -> Glutamatergic	Prefrontal cortex
1062	Newly formed oligodendrocyte	Glutamatergic	CNTN1	NRCAM	0.451334	3	CNTN1_NRCAM	CNTN1 - NRCAM	CNTN	Cell-Cell Contact	KEGG: hsa04514	Newly formed oligodendrocyte -> Glutamatergic (CC)	0.109082	Newly formed oligodendrocyte -> Glutamatergic	Prefrontal cortex
1063	Astrocyte	Glutamatergic	CNTN1	NRCAM	0.513732	3	CNTN1_NRCAM	CNTN1 - NRCAM	CNTN	Cell-Cell Contact	KEGG: hsa04514	Astrocyte -> Glutamatergic (CC)	0.142767	Astrocyte -> Glutamatergic	Prefrontal cortex
1064	GABAergic	Glutamatergic	CNTN1	NRCAM	0.503627	3	CNTN1_NRCAM	CNTN1 - NRCAM	CNTN	Cell-Cell Contact	KEGG: hsa04514	GABAergic -> Glutamatergic (CC)	0.137299	GABAergic -> Glutamatergic	Prefrontal cortex
1065	Glutamatergic	Glutamatergic	CNTN1	NRCAM	0.530987	3	CNTN1_NRCAM	CNTN1 - NRCAM	CNTN	Cell-Cell Contact	KEGG: hsa04514	Glutamatergic -> Glutamatergic (CC)	0.15209	Glutamatergic -> Glutamatergic	Prefrontal cortex
2818	Microglia (PCDH9high)	Oligodendrocyte precursor	CNTN1	NRCAM	0.32653	3	CNTN1_NRCAM	CNTN1 - NRCAM	CNTN	Cell-Cell Contact	KEGG: hsa04514	Microglia (PCDH9high) -> Oligodendrocyte precursor (Hippo)	0.0467706	Microglia (PCDH9high) -> Oligodendrocyte precursor	Hippocampus
2819	Oligodendrocyte precursor	Oligodendrocyte precursor	CNTN1	NRCAM	0.65415	3	CNTN1_NRCAM	CNTN1 - NRCAM	CNTN	Cell-Cell Contact	KEGG: hsa04514	Oligodendrocyte precursor -> Oligodendrocyte precursor (Hippo)	0.216817	Oligodendrocyte precursor -> Oligodendrocyte precursor	Hippocampus
2820	Oligodendrocyte	Oligodendrocyte precursor	CNTN1	NRCAM	0.301766	3	CNTN1_NRCAM	CNTN1 - NRCAM	CNTN	Cell-Cell Contact	KEGG: hsa04514	Oligodendrocyte -> Oligodendrocyte precursor (Hippo)	0.0363769	Oligodendrocyte -> Oligodendrocyte precursor	Hippocampus
2821	Newly formed oligodendrocyte	Oligodendrocyte precursor	CNTN1	NRCAM	0.473289	3	CNTN1_NRCAM	CNTN1 - NRCAM	CNTN	Cell-Cell Contact	KEGG: hsa04514	Newly formed oligodendrocyte -> Oligodendrocyte precursor (Hippo)	0.12089	Newly formed oligodendrocyte -> Oligodendrocyte precursor	Hippocampus
2822	Astrocyte	Oligodendrocyte precursor	CNTN1	NRCAM	0.646908	3	CNTN1_NRCAM	CNTN1 - NRCAM	CNTN	Cell-Cell Contact	KEGG: hsa04514	Astrocyte -> Oligodendrocyte precursor (Hippo)	0.213138	Astrocyte -> Oligodendrocyte precursor	Hippocampus
2823	Vascular leptomeningeal cell	Oligodendrocyte precursor	CNTN1	NRCAM	0.303581	3	CNTN1_NRCAM	CNTN1 - NRCAM	CNTN	Cell-Cell Contact	KEGG: hsa04514	Vascular leptomeningeal cell -> Oligodendrocyte precursor (Hippo)	0.0371046	Vascular leptomeningeal cell -> Oligodendrocyte precursor	Hippocampus
2824	GABAergic	Oligodendrocyte precursor	CNTN1	NRCAM	0.621433	3	CNTN1_NRCAM	CNTN1 - NRCAM	CNTN	Cell-Cell Contact	KEGG: hsa04514	GABAergic -> Oligodendrocyte precursor (Hippo)	0.200051	GABAergic -> Oligodendrocyte precursor	Hippocampus
2825	Glutamatergic	Oligodendrocyte precursor	CNTN1	NRCAM	0.665623	3	CNTN1_NRCAM	CNTN1 - NRCAM	CNTN	Cell-Cell Contact	KEGG: hsa04514	Glutamatergic -> Oligodendrocyte precursor (Hippo)	0.222606	Glutamatergic -> Oligodendrocyte precursor	Hippocampus
2826	Glutamatergic(Pyr)	Oligodendrocyte precursor	CNTN1	NRCAM	0.349354	3	CNTN1_NRCAM	CNTN1 - NRCAM	CNTN	Cell-Cell Contact	KEGG: hsa04514	Glutamatergic(Pyr) -> Oligodendrocyte precursor (Hippo)	0.0571302	Glutamatergic(Pyr) -> Oligodendrocyte precursor	Hippocampus
2827	Oligodendrocyte precursor	Newly formed oligodendrocyte	CNTN1	NRCAM	0.52185	3	CNTN1_NRCAM	CNTN1 - NRCAM	CNTN	Cell-Cell Contact	KEGG: hsa04514	Oligodendrocyte precursor -> Newly formed oligodendrocyte (Hippo)	0.147156	Oligodendrocyte precursor -> Newly formed oligodendrocyte	Hippocampus
2828	Newly formed oligodendrocyte	Newly formed oligodendrocyte	CNTN1	NRCAM	0.393851	3	CNTN1_NRCAM	CNTN1 - NRCAM	CNTN	Cell-Cell Contact	KEGG: hsa04514	Newly formed oligodendrocyte -> Newly formed oligodendrocyte (Hippo)	0.078943	Newly formed oligodendrocyte -> Newly formed oligodendrocyte	Hippocampus
2829	Astrocyte	Newly formed oligodendrocyte	CNTN1	NRCAM	0.516828	3	CNTN1_NRCAM	CNTN1 - NRCAM	CNTN	Cell-Cell Contact	KEGG: hsa04514	Astrocyte -> Newly formed oligodendrocyte (Hippo)	0.144442	Astrocyte -> Newly formed oligodendrocyte	Hippocampus
2830	GABAergic	Newly formed oligodendrocyte	CNTN1	NRCAM	0.499103	3	CNTN1_NRCAM	CNTN1 - NRCAM	CNTN	Cell-Cell Contact	KEGG: hsa04514	GABAergic -> Newly formed oligodendrocyte (Hippo)	0.134849	GABAergic -> Newly formed oligodendrocyte	Hippocampus
2831	Glutamatergic	Newly formed oligodendrocyte	CNTN1	NRCAM	0.529793	3	CNTN1_NRCAM	CNTN1 - NRCAM	CNTN	Cell-Cell Contact	KEGG: hsa04514	Glutamatergic -> Newly formed oligodendrocyte (Hippo)	0.151445	Glutamatergic -> Newly formed oligodendrocyte	Hippocampus
2832	Microglia (PCDH9high)	Astrocyte	CNTN1	NRCAM	0.295061	3	CNTN1_NRCAM	CNTN1 - NRCAM	CNTN	Cell-Cell Contact	KEGG: hsa04514	Microglia (PCDH9high) -> Astrocyte (Hippo)	0.033738	Microglia (PCDH9high) -> Astrocyte	Hippocampus
2833	Oligodendrocyte precursor	Astrocyte	CNTN1	NRCAM	0.554218	3	CNTN1_NRCAM	CNTN1 - NRCAM	CNTN	Cell-Cell Contact	KEGG: hsa04514	Oligodendrocyte precursor -> Astrocyte (Hippo)	0.164582	Oligodendrocyte precursor -> Astrocyte	Hippocampus
2834	Newly formed oligodendrocyte	Astrocyte	CNTN1	NRCAM	0.413633	3	CNTN1_NRCAM	CNTN1 - NRCAM	CNTN	Cell-Cell Contact	KEGG: hsa04514	Newly formed oligodendrocyte -> Astrocyte (Hippo)	0.0891353	Newly formed oligodendrocyte -> Astrocyte	Hippocampus
2835	Astrocyte	Astrocyte	CNTN1	NRCAM	0.54867	3	CNTN1_NRCAM	CNTN1 - NRCAM	CNTN	Cell-Cell Contact	KEGG: hsa04514	Astrocyte -> Astrocyte (Hippo)	0.161607	Astrocyte -> Astrocyte	Hippocampus
2836	GABAergic	Astrocyte	CNTN1	NRCAM	0.529108	3	CNTN1_NRCAM	CNTN1 - NRCAM	CNTN	Cell-Cell Contact	KEGG: hsa04514	GABAergic -> Astrocyte (Hippo)	0.151076	GABAergic -> Astrocyte	Hippocampus
2837	Glutamatergic	Astrocyte	CNTN1	NRCAM	0.562996	3	CNTN1_NRCAM	CNTN1 - NRCAM	CNTN	Cell-Cell Contact	KEGG: hsa04514	Glutamatergic -> Astrocyte (Hippo)	0.169278	Glutamatergic -> Astrocyte	Hippocampus
2838	Glutamatergic(Pyr)	Astrocyte	CNTN1	NRCAM	0.313871	3	CNTN1_NRCAM	CNTN1 - NRCAM	CNTN	Cell-Cell Contact	KEGG: hsa04514	Glutamatergic(Pyr) -> Astrocyte (Hippo)	0.0413361	Glutamatergic(Pyr) -> Astrocyte	Hippocampus
2839	Oligodendrocyte precursor	GABAergic	CNTN1	NRCAM	0.50365	3	CNTN1_NRCAM	CNTN1 - NRCAM	CNTN	Cell-Cell Contact	KEGG: hsa04514	Oligodendrocyte precursor -> GABAergic (Hippo)	0.137311	Oligodendrocyte precursor -> GABAergic	Hippocampus
2840	Newly formed oligodendrocyte	GABAergic	CNTN1	NRCAM	0.382612	3	CNTN1_NRCAM	CNTN1 - NRCAM	CNTN	Cell-Cell Contact	KEGG: hsa04514	Newly formed oligodendrocyte -> GABAergic (Hippo)	0.0732692	Newly formed oligodendrocyte -> GABAergic	Hippocampus
2841	Astrocyte	GABAergic	CNTN1	NRCAM	0.498917	3	CNTN1_NRCAM	CNTN1 - NRCAM	CNTN	Cell-Cell Contact	KEGG: hsa04514	Astrocyte -> GABAergic (Hippo)	0.134749	Astrocyte -> GABAergic	Hippocampus
2842	GABAergic	GABAergic	CNTN1	NRCAM	0.482204	3	CNTN1_NRCAM	CNTN1 - NRCAM	CNTN	Cell-Cell Contact	KEGG: hsa04514	GABAergic -> GABAergic (Hippo)	0.125706	GABAergic -> GABAergic	Hippocampus
2843	Glutamatergic	GABAergic	CNTN1	NRCAM	0.511132	3	CNTN1_NRCAM	CNTN1 - NRCAM	CNTN	Cell-Cell Contact	KEGG: hsa04514	Glutamatergic -> GABAergic (Hippo)	0.14136	Glutamatergic -> GABAergic	Hippocampus
2844	Glutamatergic(Pyr)	GABAergic	CNTN1	NRCAM	0.294869	2	CNTN1_NRCAM	CNTN1 - NRCAM	CNTN	Cell-Cell Contact	KEGG: hsa04514	Glutamatergic(Pyr) -> GABAergic (Hippo)	0.0336638	Glutamatergic(Pyr) -> GABAergic	Hippocampus
2845	Microglia (PCDH9high)	Glutamatergic	CNTN1	NRCAM	0.298371	3	CNTN1_NRCAM	CNTN1 - NRCAM	CNTN	Cell-Cell Contact	KEGG: hsa04514	Microglia (PCDH9high) -> Glutamatergic (Hippo)	0.0350306	Microglia (PCDH9high) -> Glutamatergic	Hippocampus
2846	Oligodendrocyte precursor	Glutamatergic	CNTN1	NRCAM	0.564359	3	CNTN1_NRCAM	CNTN1 - NRCAM	CNTN	Cell-Cell Contact	KEGG: hsa04514	Oligodendrocyte precursor -> Glutamatergic (Hippo)	0.170006	Oligodendrocyte precursor -> Glutamatergic	Hippocampus
2847	Newly formed oligodendrocyte	Glutamatergic	CNTN1	NRCAM	0.419781	3	CNTN1_NRCAM	CNTN1 - NRCAM	CNTN	Cell-Cell Contact	KEGG: hsa04514	Newly formed oligodendrocyte -> Glutamatergic (Hippo)	0.0923477	Newly formed oligodendrocyte -> Glutamatergic	Hippocampus
2848	Astrocyte	Glutamatergic	CNTN1	NRCAM	0.558644	3	CNTN1_NRCAM	CNTN1 - NRCAM	CNTN	Cell-Cell Contact	KEGG: hsa04514	Astrocyte -> Glutamatergic (Hippo)	0.166952	Astrocyte -> Glutamatergic	Hippocampus
2849	GABAergic	Glutamatergic	CNTN1	NRCAM	0.538498	3	CNTN1_NRCAM	CNTN1 - NRCAM	CNTN	Cell-Cell Contact	KEGG: hsa04514	GABAergic -> Glutamatergic (Hippo)	0.156138	GABAergic -> Glutamatergic	Hippocampus
2850	Glutamatergic	Glutamatergic	CNTN1	NRCAM	0.573403	3	CNTN1_NRCAM	CNTN1 - NRCAM	CNTN	Cell-Cell Contact	KEGG: hsa04514	Glutamatergic -> Glutamatergic (Hippo)	0.174824	Glutamatergic -> Glutamatergic	Hippocampus
2851	Glutamatergic(Pyr)	Glutamatergic	CNTN1	NRCAM	0.317589	3	CNTN1_NRCAM	CNTN1 - NRCAM	CNTN	Cell-Cell Contact	KEGG: hsa04514	Glutamatergic(Pyr) -> Glutamatergic (Hippo)	0.042907	Glutamatergic(Pyr) -> Glutamatergic	Hippocampus
1031	Oligodendrocyte	Microglia (PCDH9high)	CNTN2	CNTN2_CNTNAP2	0.261106	3	CNTN2_CNTN2_CNTNAP2	CNTN2 - (CNTN2+CNTNAP2)	CNTN	Cell-Cell Contact	KEGG: hsa04514	Oligodendrocyte -> Microglia (PCDH9high) (CC)	0.0217127	Oligodendrocyte -> Microglia (PCDH9high)	Prefrontal cortex
1032	Microglia (PCDH9high)	Oligodendrocyte	CNTN2	CNTN2_CNTNAP2	0.255957	3	CNTN2_CNTN2_CNTNAP2	CNTN2 - (CNTN2+CNTNAP2)	CNTN	Cell-Cell Contact	KEGG: hsa04514	Microglia (PCDH9high) -> Oligodendrocyte (CC)	0.0201025	Microglia (PCDH9high) -> Oligodendrocyte	Prefrontal cortex
1033	Oligodendrocyte	Oligodendrocyte	CNTN2	CNTN2_CNTNAP2	0.396354	3	CNTN2_CNTN2_CNTNAP2	CNTN2 - (CNTN2+CNTNAP2)	CNTN	Cell-Cell Contact	KEGG: hsa04514	Oligodendrocyte -> Oligodendrocyte (CC)	0.0802187	Oligodendrocyte -> Oligodendrocyte	Prefrontal cortex
1034	Newly formed oligodendrocyte	Oligodendrocyte	CNTN2	CNTN2_CNTNAP2	0.250807	3	CNTN2_CNTN2_CNTNAP2	CNTN2 - (CNTN2+CNTNAP2)	CNTN	Cell-Cell Contact	KEGG: hsa04514	Newly formed oligodendrocyte -> Oligodendrocyte (CC)	0.0185529	Newly formed oligodendrocyte -> Oligodendrocyte	Prefrontal cortex
1035	Oligodendrocyte	Newly formed oligodendrocyte	CNTN2	CNTN2_CNTNAP2	0.246358	3	CNTN2_CNTN2_CNTNAP2	CNTN2 - (CNTN2+CNTNAP2)	CNTN	Cell-Cell Contact	KEGG: hsa04514	Oligodendrocyte -> Newly formed oligodendrocyte (CC)	0.0172641	Oligodendrocyte -> Newly formed oligodendrocyte	Prefrontal cortex
2807	Microglia (PCDH9high)	Microglia (PCDH9high)	CNTN2	CNTN2_CNTNAP2	0.238168	3	CNTN2_CNTN2_CNTNAP2	CNTN2 - (CNTN2+CNTNAP2)	CNTN	Cell-Cell Contact	KEGG: hsa04514	Microglia (PCDH9high) -> Microglia (PCDH9high) (Hippo)	0.0150147	Microglia (PCDH9high) -> Microglia (PCDH9high)	Hippocampus
2808	Oligodendrocyte	Microglia (PCDH9high)	CNTN2	CNTN2_CNTNAP2	0.325343	3	CNTN2_CNTN2_CNTNAP2	CNTN2 - (CNTN2+CNTNAP2)	CNTN	Cell-Cell Contact	KEGG: hsa04514	Oligodendrocyte -> Microglia (PCDH9high) (Hippo)	0.0462506	Oligodendrocyte -> Microglia (PCDH9high)	Hippocampus
2809	Microglia (PCDH9high)	Oligodendrocyte	CNTN2	CNTN2_CNTNAP2	0.266544	3	CNTN2_CNTN2_CNTNAP2	CNTN2 - (CNTN2+CNTNAP2)	CNTN	Cell-Cell Contact	KEGG: hsa04514	Microglia (PCDH9high) -> Oligodendrocyte (Hippo)	0.0234773	Microglia (PCDH9high) -> Oligodendrocyte	Hippocampus
2810	Oligodendrocyte	Oligodendrocyte	CNTN2	CNTN2_CNTNAP2	0.378158	3	CNTN2_CNTN2_CNTNAP2	CNTN2 - (CNTN2+CNTNAP2)	CNTN	Cell-Cell Contact	KEGG: hsa04514	Oligodendrocyte -> Oligodendrocyte (Hippo)	0.0710484	Oligodendrocyte -> Oligodendrocyte	Hippocampus
2811	Oligodendrocyte	Newly formed oligodendrocyte	CNTN2	CNTN2_CNTNAP2	0.255998	3	CNTN2_CNTN2_CNTNAP2	CNTN2 - (CNTN2+CNTNAP2)	CNTN	Cell-Cell Contact	KEGG: hsa04514	Oligodendrocyte -> Newly formed oligodendrocyte (Hippo)	0.0201153	Oligodendrocyte -> Newly formed oligodendrocyte	Hippocampus
1036	Oligodendrocyte	Microglia (PCDH9high)	CNTN2	CNTN2	0.252069	3	CNTN2_CNTN2	CNTN2 - CNTN2	CNTN	Cell-Cell Contact	KEGG: hsa04514	Oligodendrocyte -> Microglia (PCDH9high) (CC)	0.0189269	Oligodendrocyte -> Microglia (PCDH9high)	Prefrontal cortex
1037	Microglia (PCDH9high)	Oligodendrocyte	CNTN2	CNTN2	0.252069	3	CNTN2_CNTN2	CNTN2 - CNTN2	CNTN	Cell-Cell Contact	KEGG: hsa04514	Microglia (PCDH9high) -> Oligodendrocyte (CC)	0.0189269	Microglia (PCDH9high) -> Oligodendrocyte	Prefrontal cortex
1038	Oligodendrocyte	Oligodendrocyte	CNTN2	CNTN2	0.387647	3	CNTN2_CNTN2	CNTN2 - CNTN2	CNTN	Cell-Cell Contact	KEGG: hsa04514	Oligodendrocyte -> Oligodendrocyte (CC)	0.0757995	Oligodendrocyte -> Oligodendrocyte	Prefrontal cortex
1039	Newly formed oligodendrocyte	Oligodendrocyte	CNTN2	CNTN2	0.247067	3	CNTN2_CNTN2	CNTN2 - CNTN2	CNTN	Cell-Cell Contact	KEGG: hsa04514	Newly formed oligodendrocyte -> Oligodendrocyte (CC)	0.0174664	Newly formed oligodendrocyte -> Oligodendrocyte	Prefrontal cortex
1040	Oligodendrocyte	Newly formed oligodendrocyte	CNTN2	CNTN2	0.247067	3	CNTN2_CNTN2	CNTN2 - CNTN2	CNTN	Cell-Cell Contact	KEGG: hsa04514	Oligodendrocyte -> Newly formed oligodendrocyte (CC)	0.0174664	Oligodendrocyte -> Newly formed oligodendrocyte	Prefrontal cortex
2812	Microglia (PCDH9high)	Microglia (PCDH9high)	CNTN2	CNTN2	0.199056	3	CNTN2_CNTN2	CNTN2 - CNTN2	CNTN	Cell-Cell Contact	KEGG: hsa04514	Microglia (PCDH9high) -> Microglia (PCDH9high) (Hippo)	0.00658001	Microglia (PCDH9high) -> Microglia (PCDH9high)	Hippocampus
2813	Oligodendrocyte	Microglia (PCDH9high)	CNTN2	CNTN2	0.257685	3	CNTN2_CNTN2	CNTN2 - CNTN2	CNTN	Cell-Cell Contact	KEGG: hsa04514	Oligodendrocyte -> Microglia (PCDH9high) (Hippo)	0.0206364	Oligodendrocyte -> Microglia (PCDH9high)	Hippocampus
2814	Microglia (PCDH9high)	Oligodendrocyte	CNTN2	CNTN2	0.257685	3	CNTN2_CNTN2	CNTN2 - CNTN2	CNTN	Cell-Cell Contact	KEGG: hsa04514	Microglia (PCDH9high) -> Oligodendrocyte (Hippo)	0.0206364	Microglia (PCDH9high) -> Oligodendrocyte	Hippocampus
2815	Oligodendrocyte	Oligodendrocyte	CNTN2	CNTN2	0.361342	3	CNTN2_CNTN2	CNTN2 - CNTN2	CNTN	Cell-Cell Contact	KEGG: hsa04514	Oligodendrocyte -> Oligodendrocyte (Hippo)	0.0628213	Oligodendrocyte -> Oligodendrocyte	Hippocampus
2816	Newly formed oligodendrocyte	Oligodendrocyte	CNTN2	CNTN2	0.208996	3	CNTN2_CNTN2	CNTN2 - CNTN2	CNTN	Cell-Cell Contact	KEGG: hsa04514	Newly formed oligodendrocyte -> Oligodendrocyte (Hippo)	0.00835597	Newly formed oligodendrocyte -> Oligodendrocyte	Hippocampus
2817	Oligodendrocyte	Newly formed oligodendrocyte	CNTN2	CNTN2	0.208996	3	CNTN2_CNTN2	CNTN2 - CNTN2	CNTN	Cell-Cell Contact	KEGG: hsa04514	Oligodendrocyte -> Newly formed oligodendrocyte (Hippo)	0.00835597	Oligodendrocyte -> Newly formed oligodendrocyte	Hippocampus
412	Vascular leptomeningeal cell	Vascular leptomeningeal cell	COL1A2	ITGA1_ITGB1	0.197554	3	COL1A2_ITGA1_ITGB1	COL1A2 - (ITGA1+ITGB1)	COLLAGEN	ECM-Receptor	KEGG: hsa04512	Vascular leptomeningeal cell -> Vascular leptomeningeal cell (CC)	0.00633341	Vascular leptomeningeal cell -> Vascular leptomeningeal cell	Prefrontal cortex
413	Fibroblast	Vascular leptomeningeal cell	COL1A2	ITGA1_ITGB1	0.256823	3	COL1A2_ITGA1_ITGB1	COL1A2 - (ITGA1+ITGB1)	COLLAGEN	ECM-Receptor	KEGG: hsa04512	Fibroblast -> Vascular leptomeningeal cell (CC)	0.0203691	Fibroblast -> Vascular leptomeningeal cell	Prefrontal cortex
414	Vascular leptomeningeal cell	Endothelial	COL1A2	ITGA1_ITGB1	0.242479	3	COL1A2_ITGA1_ITGB1	COL1A2 - (ITGA1+ITGB1)	COLLAGEN	ECM-Receptor	KEGG: hsa04512	Vascular leptomeningeal cell -> Endothelial (CC)	0.0161786	Vascular leptomeningeal cell -> Endothelial	Prefrontal cortex
415	Fibroblast	Endothelial	COL1A2	ITGA1_ITGB1	0.33584	3	COL1A2_ITGA1_ITGB1	COL1A2 - (ITGA1+ITGB1)	COLLAGEN	ECM-Receptor	KEGG: hsa04512	Fibroblast -> Endothelial (CC)	0.0509146	Fibroblast -> Endothelial	Prefrontal cortex
1957	Vascular leptomeningeal cell	Vascular leptomeningeal cell	COL1A2	ITGA1_ITGB1	0.197938	3	COL1A2_ITGA1_ITGB1	COL1A2 - (ITGA1+ITGB1)	COLLAGEN	ECM-Receptor	KEGG: hsa04512	Vascular leptomeningeal cell -> Vascular leptomeningeal cell (Hippo)	0.00639603	Vascular leptomeningeal cell -> Vascular leptomeningeal cell	Hippocampus
1958	Fibroblast	Vascular leptomeningeal cell	COL1A2	ITGA1_ITGB1	0.266842	3	COL1A2_ITGA1_ITGB1	COL1A2 - (ITGA1+ITGB1)	COLLAGEN	ECM-Receptor	KEGG: hsa04512	Fibroblast -> Vascular leptomeningeal cell (Hippo)	0.0235756	Fibroblast -> Vascular leptomeningeal cell	Hippocampus
1959	Vascular leptomeningeal cell	Endothelial	COL1A2	ITGA1_ITGB1	0.239469	3	COL1A2_ITGA1_ITGB1	COL1A2 - (ITGA1+ITGB1)	COLLAGEN	ECM-Receptor	KEGG: hsa04512	Vascular leptomeningeal cell -> Endothelial (Hippo)	0.0153613	Vascular leptomeningeal cell -> Endothelial	Hippocampus
1960	Fibroblast	Endothelial	COL1A2	ITGA1_ITGB1	0.345385	3	COL1A2_ITGA1_ITGB1	COL1A2 - (ITGA1+ITGB1)	COLLAGEN	ECM-Receptor	KEGG: hsa04512	Fibroblast -> Endothelial (Hippo)	0.0552816	Fibroblast -> Endothelial	Hippocampus
528	Vascular leptomeningeal cell	Vascular leptomeningeal cell	COL1A2	ITGA10_ITGB1	0.186069	3	COL1A2_ITGA10_ITGB1	COL1A2 - (ITGA10+ITGB1)	COLLAGEN	ECM-Receptor	KEGG: hsa04512	Vascular leptomeningeal cell -> Vascular leptomeningeal cell (CC)	0.00463388	Vascular leptomeningeal cell -> Vascular leptomeningeal cell	Prefrontal cortex
529	Fibroblast	Vascular leptomeningeal cell	COL1A2	ITGA10_ITGB1	0.23796	3	COL1A2_ITGA10_ITGB1	COL1A2 - (ITGA10+ITGB1)	COLLAGEN	ECM-Receptor	KEGG: hsa04512	Fibroblast -> Vascular leptomeningeal cell (CC)	0.0149599	Fibroblast -> Vascular leptomeningeal cell	Prefrontal cortex
2135	Vascular leptomeningeal cell	GABAergic	COL1A2	ITGA9_ITGB1	0.154875	3	COL1A2_ITGA9_ITGB1	COL1A2 - (ITGA9+ITGB1)	COLLAGEN	ECM-Receptor	KEGG: hsa04512	Vascular leptomeningeal cell -> GABAergic (Hippo)	0.00156979	Vascular leptomeningeal cell -> GABAergic	Hippocampus
2136	Fibroblast	GABAergic	COL1A2	ITGA9_ITGB1	0.194585	3	COL1A2_ITGA9_ITGB1	COL1A2 - (ITGA9+ITGB1)	COLLAGEN	ECM-Receptor	KEGG: hsa04512	Fibroblast -> GABAergic (Hippo)	0.00586269	Fibroblast -> GABAergic	Hippocampus
2137	Vascular leptomeningeal cell	Glutamatergic	COL1A2	ITGA9_ITGB1	0.184178	3	COL1A2_ITGA9_ITGB1	COL1A2 - (ITGA9+ITGB1)	COLLAGEN	ECM-Receptor	KEGG: hsa04512	Vascular leptomeningeal cell -> Glutamatergic (Hippo)	0.00438513	Vascular leptomeningeal cell -> Glutamatergic	Hippocampus
2138	Fibroblast	Glutamatergic	COL1A2	ITGA9_ITGB1	0.242745	3	COL1A2_ITGA9_ITGB1	COL1A2 - (ITGA9+ITGB1)	COLLAGEN	ECM-Receptor	KEGG: hsa04512	Fibroblast -> Glutamatergic (Hippo)	0.0162518	Fibroblast -> Glutamatergic	Hippocampus
619	Vascular leptomeningeal cell	Oligodendrocyte precursor	COL1A2	ITGAV_ITGB8	0.207166	3	COL1A2_ITGAV_ITGB8	COL1A2 - (ITGAV+ITGB8)	COLLAGEN	ECM-Receptor	KEGG: hsa04512	Vascular leptomeningeal cell -> Oligodendrocyte precursor (CC)	0.00801011	Vascular leptomeningeal cell -> Oligodendrocyte precursor	Prefrontal cortex
620	Fibroblast	Oligodendrocyte precursor	COL1A2	ITGAV_ITGB8	0.27303	3	COL1A2_ITGAV_ITGB8	COL1A2 - (ITGAV+ITGB8)	COLLAGEN	ECM-Receptor	KEGG: hsa04512	Fibroblast -> Oligodendrocyte precursor (CC)	0.0256656	Fibroblast -> Oligodendrocyte precursor	Prefrontal cortex
621	Vascular leptomeningeal cell	Newly formed oligodendrocyte	COL1A2	ITGAV_ITGB8	0.178675	3	COL1A2_ITGAV_ITGB8	COL1A2 - (ITGAV+ITGB8)	COLLAGEN	ECM-Receptor	KEGG: hsa04512	Vascular leptomeningeal cell -> Newly formed oligodendrocyte (CC)	0.00370993	Vascular leptomeningeal cell -> Newly formed oligodendrocyte	Prefrontal cortex
622	Fibroblast	Newly formed oligodendrocyte	COL1A2	ITGAV_ITGB8	0.226107	3	COL1A2_ITGAV_ITGB8	COL1A2 - (ITGAV+ITGB8)	COLLAGEN	ECM-Receptor	KEGG: hsa04512	Fibroblast -> Newly formed oligodendrocyte (CC)	0.0120019	Fibroblast -> Newly formed oligodendrocyte	Prefrontal cortex
623	Vascular leptomeningeal cell	Astrocyte	COL1A2	ITGAV_ITGB8	0.193582	3	COL1A2_ITGAV_ITGB8	COL1A2 - (ITGAV+ITGB8)	COLLAGEN	ECM-Receptor	KEGG: hsa04512	Vascular leptomeningeal cell -> Astrocyte (CC)	0.00570859	Vascular leptomeningeal cell -> Astrocyte	Prefrontal cortex
624	Fibroblast	Astrocyte	COL1A2	ITGAV_ITGB8	0.250237	3	COL1A2_ITGAV_ITGB8	COL1A2 - (ITGAV+ITGB8)	COLLAGEN	ECM-Receptor	KEGG: hsa04512	Fibroblast -> Astrocyte (CC)	0.0183852	Fibroblast -> Astrocyte	Prefrontal cortex
2341	Vascular leptomeningeal cell	Microglia (PCDH9high)	COL1A2	ITGAV_ITGB8	0.187106	3	COL1A2_ITGAV_ITGB8	COL1A2 - (ITGAV+ITGB8)	COLLAGEN	ECM-Receptor	KEGG: hsa04512	Vascular leptomeningeal cell -> Microglia (PCDH9high) (Hippo)	0.00477406	Vascular leptomeningeal cell -> Microglia (PCDH9high)	Hippocampus
2342	Fibroblast	Microglia (PCDH9high)	COL1A2	ITGAV_ITGB8	0.247793	3	COL1A2_ITGAV_ITGB8	COL1A2 - (ITGAV+ITGB8)	COLLAGEN	ECM-Receptor	KEGG: hsa04512	Fibroblast -> Microglia (PCDH9high) (Hippo)	0.0176745	Fibroblast -> Microglia (PCDH9high)	Hippocampus
2343	Vascular leptomeningeal cell	Oligodendrocyte precursor	COL1A2	ITGAV_ITGB8	0.202547	3	COL1A2_ITGAV_ITGB8	COL1A2 - (ITGAV+ITGB8)	COLLAGEN	ECM-Receptor	KEGG: hsa04512	Vascular leptomeningeal cell -> Oligodendrocyte precursor (Hippo)	0.00717518	Vascular leptomeningeal cell -> Oligodendrocyte precursor	Hippocampus
2344	Fibroblast	Oligodendrocyte precursor	COL1A2	ITGAV_ITGB8	0.275126	3	COL1A2_ITGAV_ITGB8	COL1A2 - (ITGAV+ITGB8)	COLLAGEN	ECM-Receptor	KEGG: hsa04512	Fibroblast -> Oligodendrocyte precursor (Hippo)	0.0263919	Fibroblast -> Oligodendrocyte precursor	Hippocampus
2345	Vascular leptomeningeal cell	Newly formed oligodendrocyte	COL1A2	ITGAV_ITGB8	0.174633	3	COL1A2_ITGAV_ITGB8	COL1A2 - (ITGAV+ITGB8)	COLLAGEN	ECM-Receptor	KEGG: hsa04512	Vascular leptomeningeal cell -> Newly formed oligodendrocyte (Hippo)	0.00325913	Vascular leptomeningeal cell -> Newly formed oligodendrocyte	Hippocampus
2346	Fibroblast	Newly formed oligodendrocyte	COL1A2	ITGAV_ITGB8	0.226591	3	COL1A2_ITGAV_ITGB8	COL1A2 - (ITGAV+ITGB8)	COLLAGEN	ECM-Receptor	KEGG: hsa04512	Fibroblast -> Newly formed oligodendrocyte (Hippo)	0.0121158	Fibroblast -> Newly formed oligodendrocyte	Hippocampus
2347	Vascular leptomeningeal cell	Astrocyte	COL1A2	ITGAV_ITGB8	0.187716	3	COL1A2_ITGAV_ITGB8	COL1A2 - (ITGAV+ITGB8)	COLLAGEN	ECM-Receptor	KEGG: hsa04512	Vascular leptomeningeal cell -> Astrocyte (Hippo)	0.00485771	Vascular leptomeningeal cell -> Astrocyte	Hippocampus
2348	Fibroblast	Astrocyte	COL1A2	ITGAV_ITGB8	0.24885	3	COL1A2_ITGAV_ITGB8	COL1A2 - (ITGAV+ITGB8)	COLLAGEN	ECM-Receptor	KEGG: hsa04512	Fibroblast -> Astrocyte (Hippo)	0.0179802	Fibroblast -> Astrocyte	Hippocampus
2349	Vascular leptomeningeal cell	Glutamatergic	COL1A2	ITGAV_ITGB8	0.169073	3	COL1A2_ITGAV_ITGB8	COL1A2 - (ITGAV+ITGB8)	COLLAGEN	ECM-Receptor	KEGG: hsa04512	Vascular leptomeningeal cell -> Glutamatergic (Hippo)	0.00269969	Vascular leptomeningeal cell -> Glutamatergic	Hippocampus
2350	Fibroblast	Glutamatergic	COL1A2	ITGAV_ITGB8	0.217389	3	COL1A2_ITGAV_ITGB8	COL1A2 - (ITGAV+ITGB8)	COLLAGEN	ECM-Receptor	KEGG: hsa04512	Fibroblast -> Glutamatergic (Hippo)	0.0100514	Fibroblast -> Glutamatergic	Hippocampus
2488	Vascular leptomeningeal cell	Astrocyte	COL1A2	CD44	0.177769	3	COL1A2_CD44	COL1A2 - CD44	COLLAGEN	ECM-Receptor	KEGG: hsa04512	Vascular leptomeningeal cell -> Astrocyte (Hippo)	0.0036056	Vascular leptomeningeal cell -> Astrocyte	Hippocampus
2489	Fibroblast	Astrocyte	COL1A2	CD44	0.231848	3	COL1A2_CD44	COL1A2 - CD44	COLLAGEN	ECM-Receptor	KEGG: hsa04512	Fibroblast -> Astrocyte (Hippo)	0.0133911	Fibroblast -> Astrocyte	Hippocampus
703	Vascular leptomeningeal cell	Astrocyte	COL1A2	SDC4	0.199242	3	COL1A2_SDC4	COL1A2 - SDC4	COLLAGEN	ECM-Receptor	KEGG: hsa04512	Vascular leptomeningeal cell -> Astrocyte (CC)	0.00661097	Vascular leptomeningeal cell -> Astrocyte	Prefrontal cortex
704	Fibroblast	Astrocyte	COL1A2	SDC4	0.259642	3	COL1A2_SDC4	COL1A2 - SDC4	COLLAGEN	ECM-Receptor	KEGG: hsa04512	Fibroblast -> Astrocyte (CC)	0.0212486	Fibroblast -> Astrocyte	Prefrontal cortex
2533	Vascular leptomeningeal cell	Astrocyte	COL1A2	SDC4	0.184743	3	COL1A2_SDC4	COL1A2 - SDC4	COLLAGEN	ECM-Receptor	KEGG: hsa04512	Vascular leptomeningeal cell -> Astrocyte (Hippo)	0.00445859	Vascular leptomeningeal cell -> Astrocyte	Hippocampus
2534	Fibroblast	Astrocyte	COL1A2	SDC4	0.243716	3	COL1A2_SDC4	COL1A2 - SDC4	COLLAGEN	ECM-Receptor	KEGG: hsa04512	Fibroblast -> Astrocyte (Hippo)	0.0165208	Fibroblast -> Astrocyte	Hippocampus
416	Vascular leptomeningeal cell	Vascular leptomeningeal cell	COL4A1	ITGA1_ITGB1	0.210632	3	COL4A1_ITGA1_ITGB1	COL4A1 - (ITGA1+ITGB1)	COLLAGEN	ECM-Receptor	KEGG: hsa04512	Vascular leptomeningeal cell -> Vascular leptomeningeal cell (CC)	0.00867228	Vascular leptomeningeal cell -> Vascular leptomeningeal cell	Prefrontal cortex
417	Fibroblast	Vascular leptomeningeal cell	COL4A1	ITGA1_ITGB1	0.187315	3	COL4A1_ITGA1_ITGB1	COL4A1 - (ITGA1+ITGB1)	COLLAGEN	ECM-Receptor	KEGG: hsa04512	Fibroblast -> Vascular leptomeningeal cell (CC)	0.00480265	Fibroblast -> Vascular leptomeningeal cell	Prefrontal cortex
418	Vascular leptomeningeal cell	Endothelial	COL4A1	ITGA1_ITGB1	0.262231	3	COL4A1_ITGA1_ITGB1	COL4A1 - (ITGA1+ITGB1)	COLLAGEN	ECM-Receptor	KEGG: hsa04512	Vascular leptomeningeal cell -> Endothelial (CC)	0.0220725	Vascular leptomeningeal cell -> Endothelial	Prefrontal cortex
419	Fibroblast	Endothelial	COL4A1	ITGA1_ITGB1	0.227359	3	COL4A1_ITGA1_ITGB1	COL4A1 - (ITGA1+ITGB1)	COLLAGEN	ECM-Receptor	KEGG: hsa04512	Fibroblast -> Endothelial (CC)	0.0122977	Fibroblast -> Endothelial	Prefrontal cortex
1961	Vascular leptomeningeal cell	Vascular leptomeningeal cell	COL4A1	ITGA1_ITGB1	0.241558	3	COL4A1_ITGA1_ITGB1	COL4A1 - (ITGA1+ITGB1)	COLLAGEN	ECM-Receptor	KEGG: hsa04512	Vascular leptomeningeal cell -> Vascular leptomeningeal cell (Hippo)	0.0159261	Vascular leptomeningeal cell -> Vascular leptomeningeal cell	Hippocampus
1962	Fibroblast	Vascular leptomeningeal cell	COL4A1	ITGA1_ITGB1	0.210199	3	COL4A1_ITGA1_ITGB1	COL4A1 - (ITGA1+ITGB1)	COLLAGEN	ECM-Receptor	KEGG: hsa04512	Fibroblast -> Vascular leptomeningeal cell (Hippo)	0.0085879	Fibroblast -> Vascular leptomeningeal cell	Hippocampus
1963	Endothelial	Vascular leptomeningeal cell	COL4A1	ITGA1_ITGB1	0.201057	3	COL4A1_ITGA1_ITGB1	COL4A1 - (ITGA1+ITGB1)	COLLAGEN	ECM-Receptor	KEGG: hsa04512	Endothelial -> Vascular leptomeningeal cell (Hippo)	0.00691749	Endothelial -> Vascular leptomeningeal cell	Hippocampus
1964	Glutamatergic	Vascular leptomeningeal cell	COL4A1	ITGA1_ITGB1	0.157359	3	COL4A1_ITGA1_ITGB1	COL4A1 - (ITGA1+ITGB1)	COLLAGEN	ECM-Receptor	KEGG: hsa04512	Glutamatergic -> Vascular leptomeningeal cell (Hippo)	0.0017382	Glutamatergic -> Vascular leptomeningeal cell	Hippocampus
1965	Vascular leptomeningeal cell	Endothelial	COL4A1	ITGA1_ITGB1	0.305159	3	COL4A1_ITGA1_ITGB1	COL4A1 - (ITGA1+ITGB1)	COLLAGEN	ECM-Receptor	KEGG: hsa04512	Vascular leptomeningeal cell -> Endothelial (Hippo)	0.0377422	Vascular leptomeningeal cell -> Endothelial	Hippocampus
1966	Fibroblast	Endothelial	COL4A1	ITGA1_ITGB1	0.257446	3	COL4A1_ITGA1_ITGB1	COL4A1 - (ITGA1+ITGB1)	COLLAGEN	ECM-Receptor	KEGG: hsa04512	Fibroblast -> Endothelial (Hippo)	0.0205619	Fibroblast -> Endothelial	Hippocampus
1967	Endothelial	Endothelial	COL4A1	ITGA1_ITGB1	0.244006	3	COL4A1_ITGA1_ITGB1	COL4A1 - (ITGA1+ITGB1)	COLLAGEN	ECM-Receptor	KEGG: hsa04512	Endothelial -> Endothelial (Hippo)	0.0166015	Endothelial -> Endothelial	Hippocampus
1968	Glutamatergic	Endothelial	COL4A1	ITGA1_ITGB1	0.182744	3	COL4A1_ITGA1_ITGB1	COL4A1 - (ITGA1+ITGB1)	COLLAGEN	ECM-Receptor	KEGG: hsa04512	Glutamatergic -> Endothelial (Hippo)	0.00420223	Glutamatergic -> Endothelial	Hippocampus
530	Vascular leptomeningeal cell	Vascular leptomeningeal cell	COL4A1	ITGA10_ITGB1	0.19765	3	COL4A1_ITGA10_ITGB1	COL4A1 - (ITGA10+ITGB1)	COLLAGEN	ECM-Receptor	KEGG: hsa04512	Vascular leptomeningeal cell -> Vascular leptomeningeal cell (CC)	0.00634914	Vascular leptomeningeal cell -> Vascular leptomeningeal cell	Prefrontal cortex
531	Fibroblast	Vascular leptomeningeal cell	COL4A1	ITGA10_ITGB1	0.176946	3	COL4A1_ITGA10_ITGB1	COL4A1 - (ITGA10+ITGB1)	COLLAGEN	ECM-Receptor	KEGG: hsa04512	Fibroblast -> Vascular leptomeningeal cell (CC)	0.00351243	Fibroblast -> Vascular leptomeningeal cell	Prefrontal cortex
2139	Vascular leptomeningeal cell	GABAergic	COL4A1	ITGA9_ITGB1	0.180595	3	COL4A1_ITGA9_ITGB1	COL4A1 - (ITGA9+ITGB1)	COLLAGEN	ECM-Receptor	KEGG: hsa04512	Vascular leptomeningeal cell -> GABAergic (Hippo)	0.00393727	Vascular leptomeningeal cell -> GABAergic	Hippocampus
2140	Fibroblast	GABAergic	COL4A1	ITGA9_ITGB1	0.162325	3	COL4A1_ITGA9_ITGB1	COL4A1 - (ITGA9+ITGB1)	COLLAGEN	ECM-Receptor	KEGG: hsa04512	Fibroblast -> GABAergic (Hippo)	0.00211126	Fibroblast -> GABAergic	Hippocampus
2141	Endothelial	GABAergic	COL4A1	ITGA9_ITGB1	0.156788	3	COL4A1_ITGA9_ITGB1	COL4A1 - (ITGA9+ITGB1)	COLLAGEN	ECM-Receptor	KEGG: hsa04512	Endothelial -> GABAergic (Hippo)	0.00169845	Endothelial -> GABAergic	Hippocampus
2142	Glutamatergic	GABAergic	COL4A1	ITGA9_ITGB1	0.128813	3	COL4A1_ITGA9_ITGB1	COL4A1 - (ITGA9+ITGB1)	COLLAGEN	ECM-Receptor	KEGG: hsa04512	Glutamatergic -> GABAergic (Hippo)	0.000425105	Glutamatergic -> GABAergic	Hippocampus
2143	Vascular leptomeningeal cell	Glutamatergic	COL4A1	ITGA9_ITGB1	0.221522	3	COL4A1_ITGA9_ITGB1	COL4A1 - (ITGA9+ITGB1)	COLLAGEN	ECM-Receptor	KEGG: hsa04512	Vascular leptomeningeal cell -> Glutamatergic (Hippo)	0.010952	Vascular leptomeningeal cell -> Glutamatergic	Hippocampus
2144	Fibroblast	Glutamatergic	COL4A1	ITGA9_ITGB1	0.194774	3	COL4A1_ITGA9_ITGB1	COL4A1 - (ITGA9+ITGB1)	COLLAGEN	ECM-Receptor	KEGG: hsa04512	Fibroblast -> Glutamatergic (Hippo)	0.00589197	Fibroblast -> Glutamatergic	Hippocampus
2145	Endothelial	Glutamatergic	COL4A1	ITGA9_ITGB1	0.186881	3	COL4A1_ITGA9_ITGB1	COL4A1 - (ITGA9+ITGB1)	COLLAGEN	ECM-Receptor	KEGG: hsa04512	Endothelial -> Glutamatergic (Hippo)	0.00474343	Endothelial -> Glutamatergic	Hippocampus
2146	Glutamatergic	Glutamatergic	COL4A1	ITGA9_ITGB1	0.148504	3	COL4A1_ITGA9_ITGB1	COL4A1 - (ITGA9+ITGB1)	COLLAGEN	ECM-Receptor	KEGG: hsa04512	Glutamatergic -> Glutamatergic (Hippo)	0.00118996	Glutamatergic -> Glutamatergic	Hippocampus
625	Vascular leptomeningeal cell	Oligodendrocyte precursor	COL4A1	ITGAV_ITGB8	0.221563	3	COL4A1_ITGAV_ITGB8	COL4A1 - (ITGAV+ITGB8)	COLLAGEN	ECM-Receptor	KEGG: hsa04512	Vascular leptomeningeal cell -> Oligodendrocyte precursor (CC)	0.0109613	Vascular leptomeningeal cell -> Oligodendrocyte precursor	Prefrontal cortex
626	Fibroblast	Oligodendrocyte precursor	COL4A1	ITGAV_ITGB8	0.195951	3	COL4A1_ITGAV_ITGB8	COL4A1 - (ITGAV+ITGB8)	COLLAGEN	ECM-Receptor	KEGG: hsa04512	Fibroblast -> Oligodendrocyte precursor (CC)	0.00607657	Fibroblast -> Oligodendrocyte precursor	Prefrontal cortex
627	Vascular leptomeningeal cell	Newly formed oligodendrocyte	COL4A1	ITGAV_ITGB8	0.189341	3	COL4A1_ITGAV_ITGB8	COL4A1 - (ITGAV+ITGB8)	COLLAGEN	ECM-Receptor	KEGG: hsa04512	Vascular leptomeningeal cell -> Newly formed oligodendrocyte (CC)	0.00508493	Vascular leptomeningeal cell -> Newly formed oligodendrocyte	Prefrontal cortex
628	Fibroblast	Newly formed oligodendrocyte	COL4A1	ITGAV_ITGB8	0.17024	3	COL4A1_ITGAV_ITGB8	COL4A1 - (ITGAV+ITGB8)	COLLAGEN	ECM-Receptor	KEGG: hsa04512	Fibroblast -> Newly formed oligodendrocyte (CC)	0.00281146	Fibroblast -> Newly formed oligodendrocyte	Prefrontal cortex
629	Vascular leptomeningeal cell	Astrocyte	COL4A1	ITGAV_ITGB8	0.206132	3	COL4A1_ITGAV_ITGB8	COL4A1 - (ITGAV+ITGB8)	COLLAGEN	ECM-Receptor	KEGG: hsa04512	Vascular leptomeningeal cell -> Astrocyte (CC)	0.00781854	Vascular leptomeningeal cell -> Astrocyte	Prefrontal cortex
630	Fibroblast	Astrocyte	COL4A1	ITGAV_ITGB8	0.183736	3	COL4A1_ITGAV_ITGB8	COL4A1 - (ITGAV+ITGB8)	COLLAGEN	ECM-Receptor	KEGG: hsa04512	Fibroblast -> Astrocyte (CC)	0.00432819	Fibroblast -> Astrocyte	Prefrontal cortex
2351	Vascular leptomeningeal cell	Microglia (PCDH9high)	COL4A1	ITGAV_ITGB8	0.225742	3	COL4A1_ITGAV_ITGB8	COL4A1 - (ITGAV+ITGB8)	COLLAGEN	ECM-Receptor	KEGG: hsa04512	Vascular leptomeningeal cell -> Microglia (PCDH9high) (Hippo)	0.0119164	Vascular leptomeningeal cell -> Microglia (PCDH9high)	Hippocampus
2352	Fibroblast	Microglia (PCDH9high)	COL4A1	ITGAV_ITGB8	0.198046	3	COL4A1_ITGAV_ITGB8	COL4A1 - (ITGAV+ITGB8)	COLLAGEN	ECM-Receptor	KEGG: hsa04512	Fibroblast -> Microglia (PCDH9high) (Hippo)	0.00641367	Fibroblast -> Microglia (PCDH9high)	Hippocampus
2353	Endothelial	Microglia (PCDH9high)	COL4A1	ITGAV_ITGB8	0.189896	3	COL4A1_ITGAV_ITGB8	COL4A1 - (ITGAV+ITGB8)	COLLAGEN	ECM-Receptor	KEGG: hsa04512	Endothelial -> Microglia (PCDH9high) (Hippo)	0.00516397	Endothelial -> Microglia (PCDH9high)	Hippocampus
2354	Glutamatergic	Microglia (PCDH9high)	COL4A1	ITGAV_ITGB8	0.150408	3	COL4A1_ITGAV_ITGB8	COL4A1 - (ITGAV+ITGB8)	COLLAGEN	ECM-Receptor	KEGG: hsa04512	Glutamatergic -> Microglia (PCDH9high) (Hippo)	0.00129587	Glutamatergic -> Microglia (PCDH9high)	Hippocampus
2355	Vascular leptomeningeal cell	Oligodendrocyte precursor	COL4A1	ITGAV_ITGB8	0.248385	3	COL4A1_ITGAV_ITGB8	COL4A1 - (ITGAV+ITGB8)	COLLAGEN	ECM-Receptor	KEGG: hsa04512	Vascular leptomeningeal cell -> Oligodendrocyte precursor (Hippo)	0.0178454	Vascular leptomeningeal cell -> Oligodendrocyte precursor	Hippocampus
2356	Fibroblast	Oligodendrocyte precursor	COL4A1	ITGAV_ITGB8	0.215391	3	COL4A1_ITGAV_ITGB8	COL4A1 - (ITGAV+ITGB8)	COLLAGEN	ECM-Receptor	KEGG: hsa04512	Fibroblast -> Oligodendrocyte precursor (Hippo)	0.00963147	Fibroblast -> Oligodendrocyte precursor	Hippocampus
2357	Endothelial	Oligodendrocyte precursor	COL4A1	ITGAV_ITGB8	0.205811	3	COL4A1_ITGAV_ITGB8	COL4A1 - (ITGAV+ITGB8)	COLLAGEN	ECM-Receptor	KEGG: hsa04512	Endothelial -> Oligodendrocyte precursor (Hippo)	0.00775967	Endothelial -> Oligodendrocyte precursor	Hippocampus
2358	Glutamatergic	Oligodendrocyte precursor	COL4A1	ITGAV_ITGB8	0.160272	3	COL4A1_ITGAV_ITGB8	COL4A1 - (ITGAV+ITGB8)	COLLAGEN	ECM-Receptor	KEGG: hsa04512	Glutamatergic -> Oligodendrocyte precursor (Hippo)	0.00195105	Glutamatergic -> Oligodendrocyte precursor	Hippocampus
2359	Vascular leptomeningeal cell	Newly formed oligodendrocyte	COL4A1	ITGAV_ITGB8	0.207931	3	COL4A1_ITGAV_ITGB8	COL4A1 - (ITGAV+ITGB8)	COLLAGEN	ECM-Receptor	KEGG: hsa04512	Vascular leptomeningeal cell -> Newly formed oligodendrocyte (Hippo)	0.00815359	Vascular leptomeningeal cell -> Newly formed oligodendrocyte	Hippocampus
2360	Fibroblast	Newly formed oligodendrocyte	COL4A1	ITGAV_ITGB8	0.184144	3	COL4A1_ITGAV_ITGB8	COL4A1 - (ITGAV+ITGB8)	COLLAGEN	ECM-Receptor	KEGG: hsa04512	Fibroblast -> Newly formed oligodendrocyte (Hippo)	0.00438074	Fibroblast -> Newly formed oligodendrocyte	Hippocampus
2361	Endothelial	Newly formed oligodendrocyte	COL4A1	ITGAV_ITGB8	0.177064	3	COL4A1_ITGAV_ITGB8	COL4A1 - (ITGAV+ITGB8)	COLLAGEN	ECM-Receptor	KEGG: hsa04512	Endothelial -> Newly formed oligodendrocyte (Hippo)	0.00352575	Endothelial -> Newly formed oligodendrocyte	Hippocampus
2362	Glutamatergic	Newly formed oligodendrocyte	COL4A1	ITGAV_ITGB8	0.142219	3	COL4A1_ITGAV_ITGB8	COL4A1 - (ITGAV+ITGB8)	COLLAGEN	ECM-Receptor	KEGG: hsa04512	Glutamatergic -> Newly formed oligodendrocyte (Hippo)	0.000883675	Glutamatergic -> Newly formed oligodendrocyte	Hippocampus
2363	Vascular leptomeningeal cell	Astrocyte	COL4A1	ITGAV_ITGB8	0.226624	3	COL4A1_ITGAV_ITGB8	COL4A1 - (ITGAV+ITGB8)	COLLAGEN	ECM-Receptor	KEGG: hsa04512	Vascular leptomeningeal cell -> Astrocyte (Hippo)	0.0121237	Vascular leptomeningeal cell -> Astrocyte	Hippocampus
2364	Fibroblast	Astrocyte	COL4A1	ITGAV_ITGB8	0.198729	3	COL4A1_ITGAV_ITGB8	COL4A1 - (ITGAV+ITGB8)	COLLAGEN	ECM-Receptor	KEGG: hsa04512	Fibroblast -> Astrocyte (Hippo)	0.00652587	Fibroblast -> Astrocyte	Hippocampus
2365	Endothelial	Astrocyte	COL4A1	ITGAV_ITGB8	0.190524	3	COL4A1_ITGAV_ITGB8	COL4A1 - (ITGAV+ITGB8)	COLLAGEN	ECM-Receptor	KEGG: hsa04512	Endothelial -> Astrocyte (Hippo)	0.00525442	Endothelial -> Astrocyte	Hippocampus
2366	Glutamatergic	Astrocyte	COL4A1	ITGAV_ITGB8	0.150804	3	COL4A1_ITGAV_ITGB8	COL4A1 - (ITGAV+ITGB8)	COLLAGEN	ECM-Receptor	KEGG: hsa04512	Glutamatergic -> Astrocyte (Hippo)	0.00131865	Glutamatergic -> Astrocyte	Hippocampus
2367	Vascular leptomeningeal cell	Glutamatergic	COL4A1	ITGAV_ITGB8	0.200129	3	COL4A1_ITGAV_ITGB8	COL4A1 - (ITGAV+ITGB8)	COLLAGEN	ECM-Receptor	KEGG: hsa04512	Vascular leptomeningeal cell -> Glutamatergic (Hippo)	0.0067597	Vascular leptomeningeal cell -> Glutamatergic	Hippocampus
2368	Fibroblast	Glutamatergic	COL4A1	ITGAV_ITGB8	0.177978	3	COL4A1_ITGAV_ITGB8	COL4A1 - (ITGAV+ITGB8)	COLLAGEN	ECM-Receptor	KEGG: hsa04512	Fibroblast -> Glutamatergic (Hippo)	0.00362948	Fibroblast -> Glutamatergic	Hippocampus
2369	Endothelial	Glutamatergic	COL4A1	ITGAV_ITGB8	0.171352	3	COL4A1_ITGAV_ITGB8	COL4A1 - (ITGAV+ITGB8)	COLLAGEN	ECM-Receptor	KEGG: hsa04512	Endothelial -> Glutamatergic (Hippo)	0.00292068	Endothelial -> Glutamatergic	Hippocampus
2370	Glutamatergic	Glutamatergic	COL4A1	ITGAV_ITGB8	0.138501	3	COL4A1_ITGAV_ITGB8	COL4A1 - (ITGAV+ITGB8)	COLLAGEN	ECM-Receptor	KEGG: hsa04512	Glutamatergic -> Glutamatergic (Hippo)	0.000731691	Glutamatergic -> Glutamatergic	Hippocampus
2490	Vascular leptomeningeal cell	Astrocyte	COL4A1	CD44	0.212369	3	COL4A1_CD44	COL4A1 - CD44	COLLAGEN	ECM-Receptor	KEGG: hsa04512	Vascular leptomeningeal cell -> Astrocyte (Hippo)	0.00901567	Vascular leptomeningeal cell -> Astrocyte	Hippocampus
2491	Fibroblast	Astrocyte	COL4A1	CD44	0.18763	3	COL4A1_CD44	COL4A1 - CD44	COLLAGEN	ECM-Receptor	KEGG: hsa04512	Fibroblast -> Astrocyte (Hippo)	0.00484587	Fibroblast -> Astrocyte	Hippocampus
2492	Endothelial	Astrocyte	COL4A1	CD44	0.180289	3	COL4A1_CD44	COL4A1 - CD44	COLLAGEN	ECM-Receptor	KEGG: hsa04512	Endothelial -> Astrocyte (Hippo)	0.00390045	Endothelial -> Astrocyte	Hippocampus
2493	Glutamatergic	Astrocyte	COL4A1	CD44	0.144297	3	COL4A1_CD44	COL4A1 - CD44	COLLAGEN	ECM-Receptor	KEGG: hsa04512	Glutamatergic -> Astrocyte (Hippo)	0.000977864	Glutamatergic -> Astrocyte	Hippocampus
705	Vascular leptomeningeal cell	Astrocyte	COL4A1	SDC4	0.212547	3	COL4A1_SDC4	COL4A1 - SDC4	COLLAGEN	ECM-Receptor	KEGG: hsa04512	Vascular leptomeningeal cell -> Astrocyte (CC)	0.00905141	Vascular leptomeningeal cell -> Astrocyte	Prefrontal cortex
706	Fibroblast	Astrocyte	COL4A1	SDC4	0.188835	3	COL4A1_SDC4	COL4A1 - SDC4	COLLAGEN	ECM-Receptor	KEGG: hsa04512	Fibroblast -> Astrocyte (CC)	0.00501346	Fibroblast -> Astrocyte	Prefrontal cortex
2535	Vascular leptomeningeal cell	Astrocyte	COL4A1	SDC4	0.222334	3	COL4A1_SDC4	COL4A1 - SDC4	COLLAGEN	ECM-Receptor	KEGG: hsa04512	Vascular leptomeningeal cell -> Astrocyte (Hippo)	0.0111343	Vascular leptomeningeal cell -> Astrocyte	Hippocampus
2536	Fibroblast	Astrocyte	COL4A1	SDC4	0.195405	3	COL4A1_SDC4	COL4A1 - SDC4	COLLAGEN	ECM-Receptor	KEGG: hsa04512	Fibroblast -> Astrocyte (Hippo)	0.00599052	Fibroblast -> Astrocyte	Hippocampus
2537	Endothelial	Astrocyte	COL4A1	SDC4	0.187463	3	COL4A1_SDC4	COL4A1 - SDC4	COLLAGEN	ECM-Receptor	KEGG: hsa04512	Endothelial -> Astrocyte (Hippo)	0.00482287	Endothelial -> Astrocyte	Hippocampus
2538	Glutamatergic	Astrocyte	COL4A1	SDC4	0.148872	3	COL4A1_SDC4	COL4A1 - SDC4	COLLAGEN	ECM-Receptor	KEGG: hsa04512	Glutamatergic -> Astrocyte (Hippo)	0.00120996	Glutamatergic -> Astrocyte	Hippocampus
420	Vascular leptomeningeal cell	Vascular leptomeningeal cell	COL4A2	ITGA1_ITGB1	0.212769	3	COL4A2_ITGA1_ITGB1	COL4A2 - (ITGA1+ITGB1)	COLLAGEN	ECM-Receptor	KEGG: hsa04512	Vascular leptomeningeal cell -> Vascular leptomeningeal cell (CC)	0.00909594	Vascular leptomeningeal cell -> Vascular leptomeningeal cell	Prefrontal cortex
421	Fibroblast	Vascular leptomeningeal cell	COL4A2	ITGA1_ITGB1	0.203885	3	COL4A2_ITGA1_ITGB1	COL4A2 - (ITGA1+ITGB1)	COLLAGEN	ECM-Receptor	KEGG: hsa04512	Fibroblast -> Vascular leptomeningeal cell (CC)	0.00741142	Fibroblast -> Vascular leptomeningeal cell	Prefrontal cortex
422	Endothelial	Vascular leptomeningeal cell	COL4A2	ITGA1_ITGB1	0.185791	3	COL4A2_ITGA1_ITGB1	COL4A2 - (ITGA1+ITGB1)	COLLAGEN	ECM-Receptor	KEGG: hsa04512	Endothelial -> Vascular leptomeningeal cell (CC)	0.00459685	Endothelial -> Vascular leptomeningeal cell	Prefrontal cortex
423	Vascular leptomeningeal cell	Endothelial	COL4A2	ITGA1_ITGB1	0.265506	3	COL4A2_ITGA1_ITGB1	COL4A2 - (ITGA1+ITGB1)	COLLAGEN	ECM-Receptor	KEGG: hsa04512	Vascular leptomeningeal cell -> Endothelial (CC)	0.0231355	Vascular leptomeningeal cell -> Endothelial	Prefrontal cortex
424	Fibroblast	Endothelial	COL4A2	ITGA1_ITGB1	0.25198	3	COL4A2_ITGA1_ITGB1	COL4A2 - (ITGA1+ITGB1)	COLLAGEN	ECM-Receptor	KEGG: hsa04512	Fibroblast -> Endothelial (CC)	0.0189005	Fibroblast -> Endothelial	Prefrontal cortex
425	Endothelial	Endothelial	COL4A2	ITGA1_ITGB1	0.225133	3	COL4A2_ITGA1_ITGB1	COL4A2 - (ITGA1+ITGB1)	COLLAGEN	ECM-Receptor	KEGG: hsa04512	Endothelial -> Endothelial (CC)	0.0117746	Endothelial -> Endothelial	Prefrontal cortex
1969	Vascular leptomeningeal cell	Vascular leptomeningeal cell	COL4A2	ITGA1_ITGB1	0.262715	3	COL4A2_ITGA1_ITGB1	COL4A2 - (ITGA1+ITGB1)	COLLAGEN	ECM-Receptor	KEGG: hsa04512	Vascular leptomeningeal cell -> Vascular leptomeningeal cell (Hippo)	0.0222281	Vascular leptomeningeal cell -> Vascular leptomeningeal cell	Hippocampus
1970	Fibroblast	Vascular leptomeningeal cell	COL4A2	ITGA1_ITGB1	0.214385	3	COL4A2_ITGA1_ITGB1	COL4A2 - (ITGA1+ITGB1)	COLLAGEN	ECM-Receptor	KEGG: hsa04512	Fibroblast -> Vascular leptomeningeal cell (Hippo)	0.00942385	Fibroblast -> Vascular leptomeningeal cell	Hippocampus
1971	Endothelial	Vascular leptomeningeal cell	COL4A2	ITGA1_ITGB1	0.206736	3	COL4A2_ITGA1_ITGB1	COL4A2 - (ITGA1+ITGB1)	COLLAGEN	ECM-Receptor	KEGG: hsa04512	Endothelial -> Vascular leptomeningeal cell (Hippo)	0.00793019	Endothelial -> Vascular leptomeningeal cell	Hippocampus
1972	GABAergic	Vascular leptomeningeal cell	COL4A2	ITGA1_ITGB1	0.180285	3	COL4A2_ITGA1_ITGB1	COL4A2 - (ITGA1+ITGB1)	COLLAGEN	ECM-Receptor	KEGG: hsa04512	GABAergic -> Vascular leptomeningeal cell (Hippo)	0.00390006	GABAergic -> Vascular leptomeningeal cell	Hippocampus
1973	Glutamatergic	Vascular leptomeningeal cell	COL4A2	ITGA1_ITGB1	0.180447	3	COL4A2_ITGA1_ITGB1	COL4A2 - (ITGA1+ITGB1)	COLLAGEN	ECM-Receptor	KEGG: hsa04512	Glutamatergic -> Vascular leptomeningeal cell (Hippo)	0.00391949	Glutamatergic -> Vascular leptomeningeal cell	Hippocampus
1974	Vascular leptomeningeal cell	Endothelial	COL4A2	ITGA1_ITGB1	0.338717	3	COL4A2_ITGA1_ITGB1	COL4A2 - (ITGA1+ITGB1)	COLLAGEN	ECM-Receptor	KEGG: hsa04512	Vascular leptomeningeal cell -> Endothelial (Hippo)	0.0522187	Vascular leptomeningeal cell -> Endothelial	Hippocampus
1975	Fibroblast	Endothelial	COL4A2	ITGA1_ITGB1	0.263671	3	COL4A2_ITGA1_ITGB1	COL4A2 - (ITGA1+ITGB1)	COLLAGEN	ECM-Receptor	KEGG: hsa04512	Fibroblast -> Endothelial (Hippo)	0.0225369	Fibroblast -> Endothelial	Hippocampus
1976	Endothelial	Endothelial	COL4A2	ITGA1_ITGB1	0.25233	3	COL4A2_ITGA1_ITGB1	COL4A2 - (ITGA1+ITGB1)	COLLAGEN	ECM-Receptor	KEGG: hsa04512	Endothelial -> Endothelial (Hippo)	0.0190048	Endothelial -> Endothelial	Hippocampus
1977	GABAergic	Endothelial	COL4A2	ITGA1_ITGB1	0.214268	3	COL4A2_ITGA1_ITGB1	COL4A2 - (ITGA1+ITGB1)	COLLAGEN	ECM-Receptor	KEGG: hsa04512	GABAergic -> Endothelial (Hippo)	0.00939984	GABAergic -> Endothelial	Hippocampus
1978	Glutamatergic	Endothelial	COL4A2	ITGA1_ITGB1	0.214495	3	COL4A2_ITGA1_ITGB1	COL4A2 - (ITGA1+ITGB1)	COLLAGEN	ECM-Receptor	KEGG: hsa04512	Glutamatergic -> Endothelial (Hippo)	0.00944641	Glutamatergic -> Endothelial	Hippocampus
532	Vascular leptomeningeal cell	Vascular leptomeningeal cell	COL4A2	ITGA10_ITGB1	0.199536	3	COL4A2_ITGA10_ITGB1	COL4A2 - (ITGA10+ITGB1)	COLLAGEN	ECM-Receptor	KEGG: hsa04512	Vascular leptomeningeal cell -> Vascular leptomeningeal cell (CC)	0.00666007	Vascular leptomeningeal cell -> Vascular leptomeningeal cell	Prefrontal cortex
533	Fibroblast	Vascular leptomeningeal cell	COL4A2	ITGA10_ITGB1	0.191685	3	COL4A2_ITGA10_ITGB1	COL4A2 - (ITGA10+ITGB1)	COLLAGEN	ECM-Receptor	KEGG: hsa04512	Fibroblast -> Vascular leptomeningeal cell (CC)	0.00542419	Fibroblast -> Vascular leptomeningeal cell	Prefrontal cortex
534	Endothelial	Vascular leptomeningeal cell	COL4A2	ITGA10_ITGB1	0.175583	3	COL4A2_ITGA10_ITGB1	COL4A2 - (ITGA10+ITGB1)	COLLAGEN	ECM-Receptor	KEGG: hsa04512	Endothelial -> Vascular leptomeningeal cell (CC)	0.00336174	Endothelial -> Vascular leptomeningeal cell	Prefrontal cortex
2147	Vascular leptomeningeal cell	GABAergic	COL4A2	ITGA9_ITGB1	0.192343	3	COL4A2_ITGA9_ITGB1	COL4A2 - (ITGA9+ITGB1)	COLLAGEN	ECM-Receptor	KEGG: hsa04512	Vascular leptomeningeal cell -> GABAergic (Hippo)	0.00552186	Vascular leptomeningeal cell -> GABAergic	Hippocampus
2148	Fibroblast	GABAergic	COL4A2	ITGA9_ITGB1	0.164828	3	COL4A2_ITGA9_ITGB1	COL4A2 - (ITGA9+ITGB1)	COLLAGEN	ECM-Receptor	KEGG: hsa04512	Fibroblast -> GABAergic (Hippo)	0.00231824	Fibroblast -> GABAergic	Hippocampus
2149	Endothelial	GABAergic	COL4A2	ITGA9_ITGB1	0.16024	3	COL4A2_ITGA9_ITGB1	COL4A2 - (ITGA9+ITGB1)	COLLAGEN	ECM-Receptor	KEGG: hsa04512	Endothelial -> GABAergic (Hippo)	0.00194859	Endothelial -> GABAergic	Hippocampus
2150	GABAergic	GABAergic	COL4A2	ITGA9_ITGB1	0.143815	3	COL4A2_ITGA9_ITGB1	COL4A2 - (ITGA9+ITGB1)	COLLAGEN	ECM-Receptor	KEGG: hsa04512	GABAergic -> GABAergic (Hippo)	0.000955388	GABAergic -> GABAergic	Hippocampus
2151	Glutamatergic	GABAergic	COL4A2	ITGA9_ITGB1	0.143918	3	COL4A2_ITGA9_ITGB1	COL4A2 - (ITGA9+ITGB1)	COLLAGEN	ECM-Receptor	KEGG: hsa04512	Glutamatergic -> GABAergic (Hippo)	0.000960161	Glutamatergic -> GABAergic	Hippocampus
2152	Vascular leptomeningeal cell	Glutamatergic	COL4A2	ITGA9_ITGB1	0.239301	3	COL4A2_ITGA9_ITGB1	COL4A2 - (ITGA9+ITGB1)	COLLAGEN	ECM-Receptor	KEGG: hsa04512	Vascular leptomeningeal cell -> Glutamatergic (Hippo)	0.0153163	Vascular leptomeningeal cell -> Glutamatergic	Hippocampus
2153	Fibroblast	Glutamatergic	COL4A2	ITGA9_ITGB1	0.198373	3	COL4A2_ITGA9_ITGB1	COL4A2 - (ITGA9+ITGB1)	COLLAGEN	ECM-Receptor	KEGG: hsa04512	Fibroblast -> Glutamatergic (Hippo)	0.00646721	Fibroblast -> Glutamatergic	Hippocampus
2154	Endothelial	Glutamatergic	COL4A2	ITGA9_ITGB1	0.191789	3	COL4A2_ITGA9_ITGB1	COL4A2 - (ITGA9+ITGB1)	COLLAGEN	ECM-Receptor	KEGG: hsa04512	Endothelial -> Glutamatergic (Hippo)	0.0054396	Endothelial -> Glutamatergic	Hippocampus
2155	GABAergic	Glutamatergic	COL4A2	ITGA9_ITGB1	0.168776	3	COL4A2_ITGA9_ITGB1	COL4A2 - (ITGA9+ITGB1)	COLLAGEN	ECM-Receptor	KEGG: hsa04512	GABAergic -> Glutamatergic (Hippo)	0.00267178	GABAergic -> Glutamatergic	Hippocampus
2156	Glutamatergic	Glutamatergic	COL4A2	ITGA9_ITGB1	0.168918	3	COL4A2_ITGA9_ITGB1	COL4A2 - (ITGA9+ITGB1)	COLLAGEN	ECM-Receptor	KEGG: hsa04512	Glutamatergic -> Glutamatergic (Hippo)	0.00268511	Glutamatergic -> Glutamatergic	Hippocampus
631	Vascular leptomeningeal cell	Oligodendrocyte precursor	COL4A2	ITGAV_ITGB8	0.223924	3	COL4A2_ITGAV_ITGB8	COL4A2 - (ITGAV+ITGB8)	COLLAGEN	ECM-Receptor	KEGG: hsa04512	Vascular leptomeningeal cell -> Oligodendrocyte precursor (CC)	0.0114955	Vascular leptomeningeal cell -> Oligodendrocyte precursor	Prefrontal cortex
632	Fibroblast	Oligodendrocyte precursor	COL4A2	ITGAV_ITGB8	0.214126	3	COL4A2_ITGAV_ITGB8	COL4A2 - (ITGAV+ITGB8)	COLLAGEN	ECM-Receptor	KEGG: hsa04512	Fibroblast -> Oligodendrocyte precursor (CC)	0.00937082	Fibroblast -> Oligodendrocyte precursor	Prefrontal cortex
633	Endothelial	Oligodendrocyte precursor	COL4A2	ITGAV_ITGB8	0.194286	3	COL4A2_ITGAV_ITGB8	COL4A2 - (ITGAV+ITGB8)	COLLAGEN	ECM-Receptor	KEGG: hsa04512	Endothelial -> Oligodendrocyte precursor (CC)	0.00581651	Endothelial -> Oligodendrocyte precursor	Prefrontal cortex
634	Vascular leptomeningeal cell	Newly formed oligodendrocyte	COL4A2	ITGAV_ITGB8	0.191073	3	COL4A2_ITGAV_ITGB8	COL4A2 - (ITGAV+ITGB8)	COLLAGEN	ECM-Receptor	KEGG: hsa04512	Vascular leptomeningeal cell -> Newly formed oligodendrocyte (CC)	0.00533429	Vascular leptomeningeal cell -> Newly formed oligodendrocyte	Prefrontal cortex
635	Fibroblast	Newly formed oligodendrocyte	COL4A2	ITGAV_ITGB8	0.183854	3	COL4A2_ITGAV_ITGB8	COL4A2 - (ITGAV+ITGB8)	COLLAGEN	ECM-Receptor	KEGG: hsa04512	Fibroblast -> Newly formed oligodendrocyte (CC)	0.00434335	Fibroblast -> Newly formed oligodendrocyte	Prefrontal cortex
636	Endothelial	Newly formed oligodendrocyte	COL4A2	ITGAV_ITGB8	0.168978	3	COL4A2_ITGAV_ITGB8	COL4A2 - (ITGAV+ITGB8)	COLLAGEN	ECM-Receptor	KEGG: hsa04512	Endothelial -> Newly formed oligodendrocyte (CC)	0.00269076	Endothelial -> Newly formed oligodendrocyte	Prefrontal cortex
637	Vascular leptomeningeal cell	Astrocyte	COL4A2	ITGAV_ITGB8	0.208181	3	COL4A2_ITGAV_ITGB8	COL4A2 - (ITGAV+ITGB8)	COLLAGEN	ECM-Receptor	KEGG: hsa04512	Vascular leptomeningeal cell -> Astrocyte (CC)	0.00820084	Vascular leptomeningeal cell -> Astrocyte	Prefrontal cortex
638	Fibroblast	Astrocyte	COL4A2	ITGAV_ITGB8	0.199661	3	COL4A2_ITGAV_ITGB8	COL4A2 - (ITGAV+ITGB8)	COLLAGEN	ECM-Receptor	KEGG: hsa04512	Fibroblast -> Astrocyte (CC)	0.00668096	Fibroblast -> Astrocyte	Prefrontal cortex
639	Endothelial	Astrocyte	COL4A2	ITGAV_ITGB8	0.182268	3	COL4A2_ITGAV_ITGB8	COL4A2 - (ITGAV+ITGB8)	COLLAGEN	ECM-Receptor	KEGG: hsa04512	Endothelial -> Astrocyte (CC)	0.00414264	Endothelial -> Astrocyte	Prefrontal cortex
2371	Vascular leptomeningeal cell	Microglia (PCDH9high)	COL4A2	ITGAV_ITGB8	0.24421	3	COL4A2_ITGAV_ITGB8	COL4A2 - (ITGAV+ITGB8)	COLLAGEN	ECM-Receptor	KEGG: hsa04512	Vascular leptomeningeal cell -> Microglia (PCDH9high) (Hippo)	0.0166585	Vascular leptomeningeal cell -> Microglia (PCDH9high)	Hippocampus
2372	Fibroblast	Microglia (PCDH9high)	COL4A2	ITGAV_ITGB8	0.201767	3	COL4A2_ITGAV_ITGB8	COL4A2 - (ITGAV+ITGB8)	COLLAGEN	ECM-Receptor	KEGG: hsa04512	Fibroblast -> Microglia (PCDH9high) (Hippo)	0.00703949	Fibroblast -> Microglia (PCDH9high)	Hippocampus
2373	Endothelial	Microglia (PCDH9high)	COL4A2	ITGAV_ITGB8	0.194963	3	COL4A2_ITGAV_ITGB8	COL4A2 - (ITGAV+ITGB8)	COLLAGEN	ECM-Receptor	KEGG: hsa04512	Endothelial -> Microglia (PCDH9high) (Hippo)	0.00592149	Endothelial -> Microglia (PCDH9high)	Hippocampus
2374	GABAergic	Microglia (PCDH9high)	COL4A2	ITGAV_ITGB8	0.171236	3	COL4A2_ITGAV_ITGB8	COL4A2 - (ITGAV+ITGB8)	COLLAGEN	ECM-Receptor	KEGG: hsa04512	GABAergic -> Microglia (PCDH9high) (Hippo)	0.00290919	GABAergic -> Microglia (PCDH9high)	Hippocampus
2375	Glutamatergic	Microglia (PCDH9high)	COL4A2	ITGAV_ITGB8	0.171382	3	COL4A2_ITGAV_ITGB8	COL4A2 - (ITGAV+ITGB8)	COLLAGEN	ECM-Receptor	KEGG: hsa04512	Glutamatergic -> Microglia (PCDH9high) (Hippo)	0.0029237	Glutamatergic -> Microglia (PCDH9high)	Hippocampus
2376	Vascular leptomeningeal cell	Oligodendrocyte precursor	COL4A2	ITGAV_ITGB8	0.270754	3	COL4A2_ITGAV_ITGB8	COL4A2 - (ITGAV+ITGB8)	COLLAGEN	ECM-Receptor	KEGG: hsa04512	Vascular leptomeningeal cell -> Oligodendrocyte precursor (Hippo)	0.0248875	Vascular leptomeningeal cell -> Oligodendrocyte precursor	Hippocampus
2377	Fibroblast	Oligodendrocyte precursor	COL4A2	ITGAV_ITGB8	0.219783	3	COL4A2_ITGAV_ITGB8	COL4A2 - (ITGAV+ITGB8)	COLLAGEN	ECM-Receptor	KEGG: hsa04512	Fibroblast -> Oligodendrocyte precursor (Hippo)	0.0105679	Fibroblast -> Oligodendrocyte precursor	Hippocampus
2378	Endothelial	Oligodendrocyte precursor	COL4A2	ITGAV_ITGB8	0.211761	3	COL4A2_ITGAV_ITGB8	COL4A2 - (ITGAV+ITGB8)	COLLAGEN	ECM-Receptor	KEGG: hsa04512	Endothelial -> Oligodendrocyte precursor (Hippo)	0.00889456	Endothelial -> Oligodendrocyte precursor	Hippocampus
2379	GABAergic	Oligodendrocyte precursor	COL4A2	ITGAV_ITGB8	0.184111	3	COL4A2_ITGAV_ITGB8	COL4A2 - (ITGAV+ITGB8)	COLLAGEN	ECM-Receptor	KEGG: hsa04512	GABAergic -> Oligodendrocyte precursor (Hippo)	0.0043765	GABAergic -> Oligodendrocyte precursor	Hippocampus
2380	Glutamatergic	Oligodendrocyte precursor	COL4A2	ITGAV_ITGB8	0.184279	3	COL4A2_ITGAV_ITGB8	COL4A2 - (ITGAV+ITGB8)	COLLAGEN	ECM-Receptor	KEGG: hsa04512	Glutamatergic -> Oligodendrocyte precursor (Hippo)	0.00439829	Glutamatergic -> Oligodendrocyte precursor	Hippocampus
2381	Vascular leptomeningeal cell	Newly formed oligodendrocyte	COL4A2	ITGAV_ITGB8	0.223575	3	COL4A2_ITGAV_ITGB8	COL4A2 - (ITGAV+ITGB8)	COLLAGEN	ECM-Receptor	KEGG: hsa04512	Vascular leptomeningeal cell -> Newly formed oligodendrocyte (Hippo)	0.0114156	Vascular leptomeningeal cell -> Newly formed oligodendrocyte	Hippocampus
2382	Fibroblast	Newly formed oligodendrocyte	COL4A2	ITGAV_ITGB8	0.187363	3	COL4A2_ITGAV_ITGB8	COL4A2 - (ITGAV+ITGB8)	COLLAGEN	ECM-Receptor	KEGG: hsa04512	Fibroblast -> Newly formed oligodendrocyte (Hippo)	0.00480916	Fibroblast -> Newly formed oligodendrocyte	Hippocampus
2383	Endothelial	Newly formed oligodendrocyte	COL4A2	ITGAV_ITGB8	0.18147	3	COL4A2_ITGAV_ITGB8	COL4A2 - (ITGAV+ITGB8)	COLLAGEN	ECM-Receptor	KEGG: hsa04512	Endothelial -> Newly formed oligodendrocyte (Hippo)	0.00404393	Endothelial -> Newly formed oligodendrocyte	Hippocampus
2384	GABAergic	Newly formed oligodendrocyte	COL4A2	ITGAV_ITGB8	0.160715	3	COL4A2_ITGAV_ITGB8	COL4A2 - (ITGAV+ITGB8)	COLLAGEN	ECM-Receptor	KEGG: hsa04512	GABAergic -> Newly formed oligodendrocyte (Hippo)	0.00198485	GABAergic -> Newly formed oligodendrocyte	Hippocampus
2385	Glutamatergic	Newly formed oligodendrocyte	COL4A2	ITGAV_ITGB8	0.160843	3	COL4A2_ITGAV_ITGB8	COL4A2 - (ITGAV+ITGB8)	COLLAGEN	ECM-Receptor	KEGG: hsa04512	Glutamatergic -> Newly formed oligodendrocyte (Hippo)	0.00199476	Glutamatergic -> Newly formed oligodendrocyte	Hippocampus
2386	Vascular leptomeningeal cell	Astrocyte	COL4A2	ITGAV_ITGB8	0.245238	3	COL4A2_ITGAV_ITGB8	COL4A2 - (ITGAV+ITGB8)	COLLAGEN	ECM-Receptor	KEGG: hsa04512	Vascular leptomeningeal cell -> Astrocyte (Hippo)	0.0169469	Vascular leptomeningeal cell -> Astrocyte	Hippocampus
2387	Fibroblast	Astrocyte	COL4A2	ITGAV_ITGB8	0.202475	3	COL4A2_ITGAV_ITGB8	COL4A2 - (ITGAV+ITGB8)	COLLAGEN	ECM-Receptor	KEGG: hsa04512	Fibroblast -> Astrocyte (Hippo)	0.00716255	Fibroblast -> Astrocyte	Hippocampus
2388	Endothelial	Astrocyte	COL4A2	ITGAV_ITGB8	0.195625	3	COL4A2_ITGAV_ITGB8	COL4A2 - (ITGAV+ITGB8)	COLLAGEN	ECM-Receptor	KEGG: hsa04512	Endothelial -> Astrocyte (Hippo)	0.00602513	Endothelial -> Astrocyte	Hippocampus
2389	GABAergic	Astrocyte	COL4A2	ITGAV_ITGB8	0.171748	3	COL4A2_ITGAV_ITGB8	COL4A2 - (ITGAV+ITGB8)	COLLAGEN	ECM-Receptor	KEGG: hsa04512	GABAergic -> Astrocyte (Hippo)	0.00296026	GABAergic -> Astrocyte	Hippocampus
2390	Glutamatergic	Astrocyte	COL4A2	ITGAV_ITGB8	0.171895	3	COL4A2_ITGAV_ITGB8	COL4A2 - (ITGAV+ITGB8)	COLLAGEN	ECM-Receptor	KEGG: hsa04512	Glutamatergic -> Astrocyte (Hippo)	0.00297502	Glutamatergic -> Astrocyte	Hippocampus
2391	Vascular leptomeningeal cell	Glutamatergic	COL4A2	ITGAV_ITGB8	0.214607	3	COL4A2_ITGAV_ITGB8	COL4A2 - (ITGAV+ITGB8)	COLLAGEN	ECM-Receptor	KEGG: hsa04512	Vascular leptomeningeal cell -> Glutamatergic (Hippo)	0.0094694	Vascular leptomeningeal cell -> Glutamatergic	Hippocampus
2392	Fibroblast	Glutamatergic	COL4A2	ITGAV_ITGB8	0.180986	3	COL4A2_ITGAV_ITGB8	COL4A2 - (ITGAV+ITGB8)	COLLAGEN	ECM-Receptor	KEGG: hsa04512	Fibroblast -> Glutamatergic (Hippo)	0.00398471	Fibroblast -> Glutamatergic	Hippocampus
2393	Endothelial	Glutamatergic	COL4A2	ITGAV_ITGB8	0.175478	3	COL4A2_ITGAV_ITGB8	COL4A2 - (ITGAV+ITGB8)	COLLAGEN	ECM-Receptor	KEGG: hsa04512	Endothelial -> Glutamatergic (Hippo)	0.00335023	Endothelial -> Glutamatergic	Hippocampus
2394	GABAergic	Glutamatergic	COL4A2	ITGAV_ITGB8	0.155988	3	COL4A2_ITGAV_ITGB8	COL4A2 - (ITGAV+ITGB8)	COLLAGEN	ECM-Receptor	KEGG: hsa04512	GABAergic -> Glutamatergic (Hippo)	0.00164378	GABAergic -> Glutamatergic	Hippocampus
2395	Glutamatergic	Glutamatergic	COL4A2	ITGAV_ITGB8	0.156109	3	COL4A2_ITGAV_ITGB8	COL4A2 - (ITGAV+ITGB8)	COLLAGEN	ECM-Receptor	KEGG: hsa04512	Glutamatergic -> Glutamatergic (Hippo)	0.00165199	Glutamatergic -> Glutamatergic	Hippocampus
2494	Vascular leptomeningeal cell	Astrocyte	COL4A2	CD44	0.228696	3	COL4A2_CD44	COL4A2 - CD44	COLLAGEN	ECM-Receptor	KEGG: hsa04512	Vascular leptomeningeal cell -> Astrocyte (Hippo)	0.0126182	Vascular leptomeningeal cell -> Astrocyte	Hippocampus
2495	Fibroblast	Astrocyte	COL4A2	CD44	0.190972	3	COL4A2_CD44	COL4A2 - CD44	COLLAGEN	ECM-Receptor	KEGG: hsa04512	Fibroblast -> Astrocyte (Hippo)	0.00531952	Fibroblast -> Astrocyte	Hippocampus
2496	Endothelial	Astrocyte	COL4A2	CD44	0.184857	3	COL4A2_CD44	COL4A2 - CD44	COLLAGEN	ECM-Receptor	KEGG: hsa04512	Endothelial -> Astrocyte (Hippo)	0.00447345	Endothelial -> Astrocyte	Hippocampus
2497	GABAergic	Astrocyte	COL4A2	CD44	0.163371	3	COL4A2_CD44	COL4A2 - CD44	COLLAGEN	ECM-Receptor	KEGG: hsa04512	GABAergic -> Astrocyte (Hippo)	0.00219615	GABAergic -> Astrocyte	Hippocampus
2498	Glutamatergic	Astrocyte	COL4A2	CD44	0.163504	3	COL4A2_CD44	COL4A2 - CD44	COLLAGEN	ECM-Receptor	KEGG: hsa04512	Glutamatergic -> Astrocyte (Hippo)	0.00220711	Glutamatergic -> Astrocyte	Hippocampus
707	Vascular leptomeningeal cell	Astrocyte	COL4A2	SDC4	0.214723	3	COL4A2_SDC4	COL4A2 - SDC4	COLLAGEN	ECM-Receptor	KEGG: hsa04512	Vascular leptomeningeal cell -> Astrocyte (CC)	0.00949341	Vascular leptomeningeal cell -> Astrocyte	Prefrontal cortex
708	Fibroblast	Astrocyte	COL4A2	SDC4	0.205681	3	COL4A2_SDC4	COL4A2 - SDC4	COLLAGEN	ECM-Receptor	KEGG: hsa04512	Fibroblast -> Astrocyte (CC)	0.00773585	Fibroblast -> Astrocyte	Prefrontal cortex
709	Endothelial	Astrocyte	COL4A2	SDC4	0.187286	3	COL4A2_SDC4	COL4A2 - SDC4	COLLAGEN	ECM-Receptor	KEGG: hsa04512	Endothelial -> Astrocyte (CC)	0.00479867	Endothelial -> Astrocyte	Prefrontal cortex
2539	Vascular leptomeningeal cell	Astrocyte	COL4A2	SDC4	0.240246	3	COL4A2_SDC4	COL4A2 - SDC4	COLLAGEN	ECM-Receptor	KEGG: hsa04512	Vascular leptomeningeal cell -> Astrocyte (Hippo)	0.0155701	Vascular leptomeningeal cell -> Astrocyte	Hippocampus
2540	Fibroblast	Astrocyte	COL4A2	SDC4	0.199027	3	COL4A2_SDC4	COL4A2 - SDC4	COLLAGEN	ECM-Receptor	KEGG: hsa04512	Fibroblast -> Astrocyte (Hippo)	0.00657532	Fibroblast -> Astrocyte	Hippocampus
2541	Endothelial	Astrocyte	COL4A2	SDC4	0.192402	3	COL4A2_SDC4	COL4A2 - SDC4	COLLAGEN	ECM-Receptor	KEGG: hsa04512	Endothelial -> Astrocyte (Hippo)	0.00553063	Endothelial -> Astrocyte	Hippocampus
2542	GABAergic	Astrocyte	COL4A2	SDC4	0.169251	3	COL4A2_SDC4	COL4A2 - SDC4	COLLAGEN	ECM-Receptor	KEGG: hsa04512	GABAergic -> Astrocyte (Hippo)	0.00271662	GABAergic -> Astrocyte	Hippocampus
2543	Glutamatergic	Astrocyte	COL4A2	SDC4	0.169394	3	COL4A2_SDC4	COL4A2 - SDC4	COLLAGEN	ECM-Receptor	KEGG: hsa04512	Glutamatergic -> Astrocyte (Hippo)	0.00273017	Glutamatergic -> Astrocyte	Hippocampus
426	Vascular leptomeningeal cell	Vascular leptomeningeal cell	COL4A3	ITGA1_ITGB1	0.20567	3	COL4A3_ITGA1_ITGB1	COL4A3 - (ITGA1+ITGB1)	COLLAGEN	ECM-Receptor	KEGG: hsa04512	Vascular leptomeningeal cell -> Vascular leptomeningeal cell (CC)	0.00773369	Vascular leptomeningeal cell -> Vascular leptomeningeal cell	Prefrontal cortex
427	Vascular leptomeningeal cell	Endothelial	COL4A3	ITGA1_ITGB1	0.254679	3	COL4A3_ITGA1_ITGB1	COL4A3 - (ITGA1+ITGB1)	COLLAGEN	ECM-Receptor	KEGG: hsa04512	Vascular leptomeningeal cell -> Endothelial (CC)	0.0197124	Vascular leptomeningeal cell -> Endothelial	Prefrontal cortex
1979	Oligodendrocyte precursor	Vascular leptomeningeal cell	COL4A3	ITGA1_ITGB1	0.188832	3	COL4A3_ITGA1_ITGB1	COL4A3 - (ITGA1+ITGB1)	COLLAGEN	ECM-Receptor	KEGG: hsa04512	Oligodendrocyte precursor -> Vascular leptomeningeal cell (Hippo)	0.00501302	Oligodendrocyte precursor -> Vascular leptomeningeal cell	Hippocampus
1980	Vascular leptomeningeal cell	Vascular leptomeningeal cell	COL4A3	ITGA1_ITGB1	0.201909	3	COL4A3_ITGA1_ITGB1	COL4A3 - (ITGA1+ITGB1)	COLLAGEN	ECM-Receptor	KEGG: hsa04512	Vascular leptomeningeal cell -> Vascular leptomeningeal cell (Hippo)	0.0070641	Vascular leptomeningeal cell -> Vascular leptomeningeal cell	Hippocampus
1981	Oligodendrocyte precursor	Endothelial	COL4A3	ITGA1_ITGB1	0.226368	3	COL4A3_ITGA1_ITGB1	COL4A3 - (ITGA1+ITGB1)	COLLAGEN	ECM-Receptor	KEGG: hsa04512	Oligodendrocyte precursor -> Endothelial (Hippo)	0.0120633	Oligodendrocyte precursor -> Endothelial	Hippocampus
1982	Vascular leptomeningeal cell	Endothelial	COL4A3	ITGA1_ITGB1	0.245248	3	COL4A3_ITGA1_ITGB1	COL4A3 - (ITGA1+ITGB1)	COLLAGEN	ECM-Receptor	KEGG: hsa04512	Vascular leptomeningeal cell -> Endothelial (Hippo)	0.0169498	Vascular leptomeningeal cell -> Endothelial	Hippocampus
535	Vascular leptomeningeal cell	Vascular leptomeningeal cell	COL4A3	ITGA10_ITGB1	0.193265	3	COL4A3_ITGA10_ITGB1	COL4A3 - (ITGA10+ITGB1)	COLLAGEN	ECM-Receptor	KEGG: hsa04512	Vascular leptomeningeal cell -> Vascular leptomeningeal cell (CC)	0.00566055	Vascular leptomeningeal cell -> Vascular leptomeningeal cell	Prefrontal cortex
2157	Oligodendrocyte precursor	GABAergic	COL4A3	ITGA9_ITGB1	0.14922	3	COL4A3_ITGA9_ITGB1	COL4A3 - (ITGA9+ITGB1)	COLLAGEN	ECM-Receptor	KEGG: hsa04512	Oligodendrocyte precursor -> GABAergic (Hippo)	0.00122907	Oligodendrocyte precursor -> GABAergic	Hippocampus
2158	Vascular leptomeningeal cell	GABAergic	COL4A3	ITGA9_ITGB1	0.157308	3	COL4A3_ITGA9_ITGB1	COL4A3 - (ITGA9+ITGB1)	COLLAGEN	ECM-Receptor	KEGG: hsa04512	Vascular leptomeningeal cell -> GABAergic (Hippo)	0.00173463	Vascular leptomeningeal cell -> GABAergic	Hippocampus
2159	Oligodendrocyte precursor	Glutamatergic	COL4A3	ITGA9_ITGB1	0.176255	3	COL4A3_ITGA9_ITGB1	COL4A3 - (ITGA9+ITGB1)	COLLAGEN	ECM-Receptor	KEGG: hsa04512	Oligodendrocyte precursor -> Glutamatergic (Hippo)	0.00343544	Oligodendrocyte precursor -> Glutamatergic	Hippocampus
2160	Vascular leptomeningeal cell	Glutamatergic	COL4A3	ITGA9_ITGB1	0.187618	3	COL4A3_ITGA9_ITGB1	COL4A3 - (ITGA9+ITGB1)	COLLAGEN	ECM-Receptor	KEGG: hsa04512	Vascular leptomeningeal cell -> Glutamatergic (Hippo)	0.00484418	Vascular leptomeningeal cell -> Glutamatergic	Hippocampus
640	Vascular leptomeningeal cell	Oligodendrocyte precursor	COL4A3	ITGAV_ITGB8	0.216091	3	COL4A3_ITGAV_ITGB8	COL4A3 - (ITGAV+ITGB8)	COLLAGEN	ECM-Receptor	KEGG: hsa04512	Vascular leptomeningeal cell -> Oligodendrocyte precursor (CC)	0.00977746	Vascular leptomeningeal cell -> Oligodendrocyte precursor	Prefrontal cortex
641	Vascular leptomeningeal cell	Newly formed oligodendrocyte	COL4A3	ITGAV_ITGB8	0.185308	3	COL4A3_ITGAV_ITGB8	COL4A3 - (ITGAV+ITGB8)	COLLAGEN	ECM-Receptor	KEGG: hsa04512	Vascular leptomeningeal cell -> Newly formed oligodendrocyte (CC)	0.00453282	Vascular leptomeningeal cell -> Newly formed oligodendrocyte	Prefrontal cortex
642	Vascular leptomeningeal cell	Astrocyte	COL4A3	ITGAV_ITGB8	0.201374	3	COL4A3_ITGAV_ITGB8	COL4A3 - (ITGAV+ITGB8)	COLLAGEN	ECM-Receptor	KEGG: hsa04512	Vascular leptomeningeal cell -> Astrocyte (CC)	0.0069717	Vascular leptomeningeal cell -> Astrocyte	Prefrontal cortex
2396	Oligodendrocyte precursor	Microglia (PCDH9high)	COL4A3	ITGAV_ITGB8	0.178937	3	COL4A3_ITGAV_ITGB8	COL4A3 - (ITGAV+ITGB8)	COLLAGEN	ECM-Receptor	KEGG: hsa04512	Oligodendrocyte precursor -> Microglia (PCDH9high) (Hippo)	0.00374045	Oligodendrocyte precursor -> Microglia (PCDH9high)	Hippocampus
2397	Vascular leptomeningeal cell	Microglia (PCDH9high)	COL4A3	ITGAV_ITGB8	0.190656	3	COL4A3_ITGAV_ITGB8	COL4A3 - (ITGAV+ITGB8)	COLLAGEN	ECM-Receptor	KEGG: hsa04512	Vascular leptomeningeal cell -> Microglia (PCDH9high) (Hippo)	0.00527361	Vascular leptomeningeal cell -> Microglia (PCDH9high)	Hippocampus
2398	Oligodendrocyte precursor	Oligodendrocyte precursor	COL4A3	ITGAV_ITGB8	0.193028	3	COL4A3_ITGAV_ITGB8	COL4A3 - (ITGAV+ITGB8)	COLLAGEN	ECM-Receptor	KEGG: hsa04512	Oligodendrocyte precursor -> Oligodendrocyte precursor (Hippo)	0.00562465	Oligodendrocyte precursor -> Oligodendrocyte precursor	Hippocampus
2399	Vascular leptomeningeal cell	Oligodendrocyte precursor	COL4A3	ITGAV_ITGB8	0.206703	3	COL4A3_ITGAV_ITGB8	COL4A3 - (ITGAV+ITGB8)	COLLAGEN	ECM-Receptor	KEGG: hsa04512	Vascular leptomeningeal cell -> Oligodendrocyte precursor (Hippo)	0.00792398	Vascular leptomeningeal cell -> Oligodendrocyte precursor	Hippocampus
2400	Oligodendrocyte precursor	Newly formed oligodendrocyte	COL4A3	ITGAV_ITGB8	0.167487	3	COL4A3_ITGAV_ITGB8	COL4A3 - (ITGAV+ITGB8)	COLLAGEN	ECM-Receptor	KEGG: hsa04512	Oligodendrocyte precursor -> Newly formed oligodendrocyte (Hippo)	0.00255267	Oligodendrocyte precursor -> Newly formed oligodendrocyte	Hippocampus
2401	Vascular leptomeningeal cell	Newly formed oligodendrocyte	COL4A3	ITGAV_ITGB8	0.177727	3	COL4A3_ITGAV_ITGB8	COL4A3 - (ITGAV+ITGB8)	COLLAGEN	ECM-Receptor	KEGG: hsa04512	Vascular leptomeningeal cell -> Newly formed oligodendrocyte (Hippo)	0.00360073	Vascular leptomeningeal cell -> Newly formed oligodendrocyte	Hippocampus
2402	Oligodendrocyte precursor	Astrocyte	COL4A3	ITGAV_ITGB8	0.179496	3	COL4A3_ITGAV_ITGB8	COL4A3 - (ITGAV+ITGB8)	COLLAGEN	ECM-Receptor	KEGG: hsa04512	Oligodendrocyte precursor -> Astrocyte (Hippo)	0.00380606	Oligodendrocyte precursor -> Astrocyte	Hippocampus
2403	Vascular leptomeningeal cell	Astrocyte	COL4A3	ITGAV_ITGB8	0.191289	3	COL4A3_ITGAV_ITGB8	COL4A3 - (ITGAV+ITGB8)	COLLAGEN	ECM-Receptor	KEGG: hsa04512	Vascular leptomeningeal cell -> Astrocyte (Hippo)	0.00536597	Vascular leptomeningeal cell -> Astrocyte	Hippocampus
2404	Oligodendrocyte precursor	Glutamatergic	COL4A3	ITGAV_ITGB8	0.162362	3	COL4A3_ITGAV_ITGB8	COL4A3 - (ITGAV+ITGB8)	COLLAGEN	ECM-Receptor	KEGG: hsa04512	Oligodendrocyte precursor -> Glutamatergic (Hippo)	0.00211424	Oligodendrocyte precursor -> Glutamatergic	Hippocampus
2405	Vascular leptomeningeal cell	Glutamatergic	COL4A3	ITGAV_ITGB8	0.171973	3	COL4A3_ITGAV_ITGB8	COL4A3 - (ITGAV+ITGB8)	COLLAGEN	ECM-Receptor	KEGG: hsa04512	Vascular leptomeningeal cell -> Glutamatergic (Hippo)	0.00298283	Vascular leptomeningeal cell -> Glutamatergic	Hippocampus
2499	Oligodendrocyte precursor	Astrocyte	COL4A3	CD44	0.170372	3	COL4A3_CD44	COL4A3 - CD44	COLLAGEN	ECM-Receptor	KEGG: hsa04512	Oligodendrocyte precursor -> Astrocyte (Hippo)	0.00282425	Oligodendrocyte precursor -> Astrocyte	Hippocampus
2500	Vascular leptomeningeal cell	Astrocyte	COL4A3	CD44	0.180975	3	COL4A3_CD44	COL4A3 - CD44	COLLAGEN	ECM-Receptor	KEGG: hsa04512	Vascular leptomeningeal cell -> Astrocyte (Hippo)	0.00398337	Vascular leptomeningeal cell -> Astrocyte	Hippocampus
710	Vascular leptomeningeal cell	Astrocyte	COL4A3	SDC4	0.207497	3	COL4A3_SDC4	COL4A3 - SDC4	COLLAGEN	ECM-Receptor	KEGG: hsa04512	Vascular leptomeningeal cell -> Astrocyte (CC)	0.00807212	Vascular leptomeningeal cell -> Astrocyte	Prefrontal cortex
2544	Oligodendrocyte precursor	Astrocyte	COL4A3	SDC4	0.176773	3	COL4A3_SDC4	COL4A3 - SDC4	COLLAGEN	ECM-Receptor	KEGG: hsa04512	Oligodendrocyte precursor -> Astrocyte (Hippo)	0.00349305	Oligodendrocyte precursor -> Astrocyte	Hippocampus
2545	Vascular leptomeningeal cell	Astrocyte	COL4A3	SDC4	0.188204	3	COL4A3_SDC4	COL4A3 - SDC4	COLLAGEN	ECM-Receptor	KEGG: hsa04512	Vascular leptomeningeal cell -> Astrocyte (Hippo)	0.0049253	Vascular leptomeningeal cell -> Astrocyte	Hippocampus
428	Vascular leptomeningeal cell	Vascular leptomeningeal cell	COL4A4	ITGA1_ITGB1	0.201315	3	COL4A4_ITGA1_ITGB1	COL4A4 - (ITGA1+ITGB1)	COLLAGEN	ECM-Receptor	KEGG: hsa04512	Vascular leptomeningeal cell -> Vascular leptomeningeal cell (CC)	0.00696167	Vascular leptomeningeal cell -> Vascular leptomeningeal cell	Prefrontal cortex
429	Vascular leptomeningeal cell	Endothelial	COL4A4	ITGA1_ITGB1	0.24811	3	COL4A4_ITGA1_ITGB1	COL4A4 - (ITGA1+ITGB1)	COLLAGEN	ECM-Receptor	KEGG: hsa04512	Vascular leptomeningeal cell -> Endothelial (CC)	0.017766	Vascular leptomeningeal cell -> Endothelial	Prefrontal cortex
1983	Vascular leptomeningeal cell	Vascular leptomeningeal cell	COL4A4	ITGA1_ITGB1	0.191543	3	COL4A4_ITGA1_ITGB1	COL4A4 - (ITGA1+ITGB1)	COLLAGEN	ECM-Receptor	KEGG: hsa04512	Vascular leptomeningeal cell -> Vascular leptomeningeal cell (Hippo)	0.00540324	Vascular leptomeningeal cell -> Vascular leptomeningeal cell	Hippocampus
1984	Vascular leptomeningeal cell	Endothelial	COL4A4	ITGA1_ITGB1	0.230246	3	COL4A4_ITGA1_ITGB1	COL4A4 - (ITGA1+ITGB1)	COLLAGEN	ECM-Receptor	KEGG: hsa04512	Vascular leptomeningeal cell -> Endothelial (Hippo)	0.0129951	Vascular leptomeningeal cell -> Endothelial	Hippocampus
536	Vascular leptomeningeal cell	Vascular leptomeningeal cell	COL4A4	ITGA10_ITGB1	0.189408	3	COL4A4_ITGA10_ITGB1	COL4A4 - (ITGA10+ITGB1)	COLLAGEN	ECM-Receptor	KEGG: hsa04512	Vascular leptomeningeal cell -> Vascular leptomeningeal cell (CC)	0.00509442	Vascular leptomeningeal cell -> Vascular leptomeningeal cell	Prefrontal cortex
2161	Vascular leptomeningeal cell	GABAergic	COL4A4	ITGA9_ITGB1	0.150915	3	COL4A4_ITGA9_ITGB1	COL4A4 - (ITGA9+ITGB1)	COLLAGEN	ECM-Receptor	KEGG: hsa04512	Vascular leptomeningeal cell -> GABAergic (Hippo)	0.00132513	Vascular leptomeningeal cell -> GABAergic	Hippocampus
2162	Vascular leptomeningeal cell	Glutamatergic	COL4A4	ITGA9_ITGB1	0.178618	3	COL4A4_ITGA9_ITGB1	COL4A4 - (ITGA9+ITGB1)	COLLAGEN	ECM-Receptor	KEGG: hsa04512	Vascular leptomeningeal cell -> Glutamatergic (Hippo)	0.00370331	Vascular leptomeningeal cell -> Glutamatergic	Hippocampus
643	Vascular leptomeningeal cell	Oligodendrocyte precursor	COL4A4	ITGAV_ITGB8	0.211299	3	COL4A4_ITGAV_ITGB8	COL4A4 - (ITGAV+ITGB8)	COLLAGEN	ECM-Receptor	KEGG: hsa04512	Vascular leptomeningeal cell -> Oligodendrocyte precursor (CC)	0.00880323	Vascular leptomeningeal cell -> Oligodendrocyte precursor	Prefrontal cortex
644	Vascular leptomeningeal cell	Newly formed oligodendrocyte	COL4A4	ITGAV_ITGB8	0.181755	3	COL4A4_ITGAV_ITGB8	COL4A4 - (ITGAV+ITGB8)	COLLAGEN	ECM-Receptor	KEGG: hsa04512	Vascular leptomeningeal cell -> Newly formed oligodendrocyte (CC)	0.00407902	Vascular leptomeningeal cell -> Newly formed oligodendrocyte	Prefrontal cortex
645	Vascular leptomeningeal cell	Astrocyte	COL4A4	ITGAV_ITGB8	0.197194	3	COL4A4_ITGAV_ITGB8	COL4A4 - (ITGAV+ITGB8)	COLLAGEN	ECM-Receptor	KEGG: hsa04512	Vascular leptomeningeal cell -> Astrocyte (CC)	0.00627527	Vascular leptomeningeal cell -> Astrocyte	Prefrontal cortex
2406	Vascular leptomeningeal cell	Microglia (PCDH9high)	COL4A4	ITGAV_ITGB8	0.181373	3	COL4A4_ITGAV_ITGB8	COL4A4 - (ITGAV+ITGB8)	COLLAGEN	ECM-Receptor	KEGG: hsa04512	Vascular leptomeningeal cell -> Microglia (PCDH9high) (Hippo)	0.00403201	Vascular leptomeningeal cell -> Microglia (PCDH9high)	Hippocampus
2407	Vascular leptomeningeal cell	Oligodendrocyte precursor	COL4A4	ITGAV_ITGB8	0.19586	3	COL4A4_ITGAV_ITGB8	COL4A4 - (ITGAV+ITGB8)	COLLAGEN	ECM-Receptor	KEGG: hsa04512	Vascular leptomeningeal cell -> Oligodendrocyte precursor (Hippo)	0.00606219	Vascular leptomeningeal cell -> Oligodendrocyte precursor	Hippocampus
2408	Vascular leptomeningeal cell	Newly formed oligodendrocyte	COL4A4	ITGAV_ITGB8	0.169622	3	COL4A4_ITGAV_ITGB8	COL4A4 - (ITGAV+ITGB8)	COLLAGEN	ECM-Receptor	KEGG: hsa04512	Vascular leptomeningeal cell -> Newly formed oligodendrocyte (Hippo)	0.0027519	Vascular leptomeningeal cell -> Newly formed oligodendrocyte	Hippocampus
2409	Vascular leptomeningeal cell	Astrocyte	COL4A4	ITGAV_ITGB8	0.181947	3	COL4A4_ITGAV_ITGB8	COL4A4 - (ITGAV+ITGB8)	COLLAGEN	ECM-Receptor	KEGG: hsa04512	Vascular leptomeningeal cell -> Astrocyte (Hippo)	0.00410271	Vascular leptomeningeal cell -> Astrocyte	Hippocampus
2410	Vascular leptomeningeal cell	Glutamatergic	COL4A4	ITGAV_ITGB8	0.164369	3	COL4A4_ITGAV_ITGB8	COL4A4 - (ITGAV+ITGB8)	COLLAGEN	ECM-Receptor	KEGG: hsa04512	Vascular leptomeningeal cell -> Glutamatergic (Hippo)	0.00227933	Vascular leptomeningeal cell -> Glutamatergic	Hippocampus
2501	Vascular leptomeningeal cell	Astrocyte	COL4A4	CD44	0.172581	3	COL4A4_CD44	COL4A4 - CD44	COLLAGEN	ECM-Receptor	KEGG: hsa04512	Vascular leptomeningeal cell -> Astrocyte (Hippo)	0.00304461	Vascular leptomeningeal cell -> Astrocyte	Hippocampus
711	Vascular leptomeningeal cell	Astrocyte	COL4A4	SDC4	0.203067	3	COL4A4_SDC4	COL4A4 - SDC4	COLLAGEN	ECM-Receptor	KEGG: hsa04512	Vascular leptomeningeal cell -> Astrocyte (CC)	0.00726657	Vascular leptomeningeal cell -> Astrocyte	Prefrontal cortex
2546	Vascular leptomeningeal cell	Astrocyte	COL4A4	SDC4	0.17915	3	COL4A4_SDC4	COL4A4 - SDC4	COLLAGEN	ECM-Receptor	KEGG: hsa04512	Vascular leptomeningeal cell -> Astrocyte (Hippo)	0.00376539	Vascular leptomeningeal cell -> Astrocyte	Hippocampus
430	Microglia (PCDH9high)	Vascular leptomeningeal cell	COL4A5	ITGA1_ITGB1	0.186625	3	COL4A5_ITGA1_ITGB1	COL4A5 - (ITGA1+ITGB1)	COLLAGEN	ECM-Receptor	KEGG: hsa04512	Microglia (PCDH9high) -> Vascular leptomeningeal cell (CC)	0.0047087	Microglia (PCDH9high) -> Vascular leptomeningeal cell	Prefrontal cortex
431	Oligodendrocyte	Vascular leptomeningeal cell	COL4A5	ITGA1_ITGB1	0.263522	3	COL4A5_ITGA1_ITGB1	COL4A5 - (ITGA1+ITGB1)	COLLAGEN	ECM-Receptor	KEGG: hsa04512	Oligodendrocyte -> Vascular leptomeningeal cell (CC)	0.0224886	Oligodendrocyte -> Vascular leptomeningeal cell	Prefrontal cortex
432	Fibroblast	Vascular leptomeningeal cell	COL4A5	ITGA1_ITGB1	0.193034	3	COL4A5_ITGA1_ITGB1	COL4A5 - (ITGA1+ITGB1)	COLLAGEN	ECM-Receptor	KEGG: hsa04512	Fibroblast -> Vascular leptomeningeal cell (CC)	0.00562549	Fibroblast -> Vascular leptomeningeal cell	Prefrontal cortex
433	Microglia (PCDH9high)	Endothelial	COL4A5	ITGA1_ITGB1	0.22635	3	COL4A5_ITGA1_ITGB1	COL4A5 - (ITGA1+ITGB1)	COLLAGEN	ECM-Receptor	KEGG: hsa04512	Microglia (PCDH9high) -> Endothelial (CC)	0.012059	Microglia (PCDH9high) -> Endothelial	Prefrontal cortex
434	Oligodendrocyte	Endothelial	COL4A5	ITGA1_ITGB1	0.346999	3	COL4A5_ITGA1_ITGB1	COL4A5 - (ITGA1+ITGB1)	COLLAGEN	ECM-Receptor	KEGG: hsa04512	Oligodendrocyte -> Endothelial (CC)	0.0560307	Oligodendrocyte -> Endothelial	Prefrontal cortex
435	Fibroblast	Endothelial	COL4A5	ITGA1_ITGB1	0.235766	3	COL4A5_ITGA1_ITGB1	COL4A5 - (ITGA1+ITGB1)	COLLAGEN	ECM-Receptor	KEGG: hsa04512	Fibroblast -> Endothelial (CC)	0.0143862	Fibroblast -> Endothelial	Prefrontal cortex
1985	Oligodendrocyte	Vascular leptomeningeal cell	COL4A5	ITGA1_ITGB1	0.208052	3	COL4A5_ITGA1_ITGB1	COL4A5 - (ITGA1+ITGB1)	COLLAGEN	ECM-Receptor	KEGG: hsa04512	Oligodendrocyte -> Vascular leptomeningeal cell (Hippo)	0.00817643	Oligodendrocyte -> Vascular leptomeningeal cell	Hippocampus
1986	Fibroblast	Vascular leptomeningeal cell	COL4A5	ITGA1_ITGB1	0.194396	3	COL4A5_ITGA1_ITGB1	COL4A5 - (ITGA1+ITGB1)	COLLAGEN	ECM-Receptor	KEGG: hsa04512	Fibroblast -> Vascular leptomeningeal cell (Hippo)	0.0058335	Fibroblast -> Vascular leptomeningeal cell	Hippocampus
1987	Oligodendrocyte	Endothelial	COL4A5	ITGA1_ITGB1	0.25427	3	COL4A5_ITGA1_ITGB1	COL4A5 - (ITGA1+ITGB1)	COLLAGEN	ECM-Receptor	KEGG: hsa04512	Oligodendrocyte -> Endothelial (Hippo)	0.0195881	Oligodendrocyte -> Endothelial	Hippocampus
1988	Fibroblast	Endothelial	COL4A5	ITGA1_ITGB1	0.234347	3	COL4A5_ITGA1_ITGB1	COL4A5 - (ITGA1+ITGB1)	COLLAGEN	ECM-Receptor	KEGG: hsa04512	Fibroblast -> Endothelial (Hippo)	0.0140214	Fibroblast -> Endothelial	Hippocampus
537	Microglia (PCDH9high)	Vascular leptomeningeal cell	COL4A5	ITGA10_ITGB1	0.176329	3	COL4A5_ITGA10_ITGB1	COL4A5 - (ITGA10+ITGB1)	COLLAGEN	ECM-Receptor	KEGG: hsa04512	Microglia (PCDH9high) -> Vascular leptomeningeal cell (CC)	0.00344364	Microglia (PCDH9high) -> Vascular leptomeningeal cell	Prefrontal cortex
538	Oligodendrocyte	Vascular leptomeningeal cell	COL4A5	ITGA10_ITGB1	0.243735	3	COL4A5_ITGA10_ITGB1	COL4A5 - (ITGA10+ITGB1)	COLLAGEN	ECM-Receptor	KEGG: hsa04512	Oligodendrocyte -> Vascular leptomeningeal cell (CC)	0.016526	Oligodendrocyte -> Vascular leptomeningeal cell	Prefrontal cortex
539	Fibroblast	Vascular leptomeningeal cell	COL4A5	ITGA10_ITGB1	0.182047	3	COL4A5_ITGA10_ITGB1	COL4A5 - (ITGA10+ITGB1)	COLLAGEN	ECM-Receptor	KEGG: hsa04512	Fibroblast -> Vascular leptomeningeal cell (CC)	0.00411514	Fibroblast -> Vascular leptomeningeal cell	Prefrontal cortex
2163	Oligodendrocyte	GABAergic	COL4A5	ITGA9_ITGB1	0.161034	3	COL4A5_ITGA9_ITGB1	COL4A5 - (ITGA9+ITGB1)	COLLAGEN	ECM-Receptor	KEGG: hsa04512	Oligodendrocyte -> GABAergic (Hippo)	0.00200947	Oligodendrocyte -> GABAergic	Hippocampus
2164	Fibroblast	GABAergic	COL4A5	ITGA9_ITGB1	0.152688	3	COL4A5_ITGA9_ITGB1	COL4A5 - (ITGA9+ITGB1)	COLLAGEN	ECM-Receptor	KEGG: hsa04512	Fibroblast -> GABAergic (Hippo)	0.00143111	Fibroblast -> GABAergic	Hippocampus
2165	Oligodendrocyte	Glutamatergic	COL4A5	ITGA9_ITGB1	0.192924	3	COL4A5_ITGA9_ITGB1	COL4A5 - (ITGA9+ITGB1)	COLLAGEN	ECM-Receptor	KEGG: hsa04512	Oligodendrocyte -> Glutamatergic (Hippo)	0.00560894	Oligodendrocyte -> Glutamatergic	Hippocampus
2166	Fibroblast	Glutamatergic	COL4A5	ITGA9_ITGB1	0.181101	3	COL4A5_ITGA9_ITGB1	COL4A5 - (ITGA9+ITGB1)	COLLAGEN	ECM-Receptor	KEGG: hsa04512	Fibroblast -> Glutamatergic (Hippo)	0.00399875	Fibroblast -> Glutamatergic	Hippocampus
646	Microglia (PCDH9high)	Oligodendrocyte precursor	COL4A5	ITGAV_ITGB8	0.195196	3	COL4A5_ITGAV_ITGB8	COL4A5 - (ITGAV+ITGB8)	COLLAGEN	ECM-Receptor	KEGG: hsa04512	Microglia (PCDH9high) -> Oligodendrocyte precursor (CC)	0.00595786	Microglia (PCDH9high) -> Oligodendrocyte precursor	Prefrontal cortex
647	Oligodendrocyte	Oligodendrocyte precursor	COL4A5	ITGAV_ITGB8	0.28057	3	COL4A5_ITGAV_ITGB8	COL4A5 - (ITGAV+ITGB8)	COLLAGEN	ECM-Receptor	KEGG: hsa04512	Oligodendrocyte -> Oligodendrocyte precursor (CC)	0.0283203	Oligodendrocyte -> Oligodendrocyte precursor	Prefrontal cortex
648	Fibroblast	Oligodendrocyte precursor	COL4A5	ITGAV_ITGB8	0.202208	3	COL4A5_ITGAV_ITGB8	COL4A5 - (ITGAV+ITGB8)	COLLAGEN	ECM-Receptor	KEGG: hsa04512	Fibroblast -> Oligodendrocyte precursor (CC)	0.00711612	Fibroblast -> Oligodendrocyte precursor	Prefrontal cortex
649	Microglia (PCDH9high)	Newly formed oligodendrocyte	COL4A5	ITGAV_ITGB8	0.169669	2	COL4A5_ITGAV_ITGB8	COL4A5 - (ITGAV+ITGB8)	COLLAGEN	ECM-Receptor	KEGG: hsa04512	Microglia (PCDH9high) -> Newly formed oligodendrocyte (CC)	0.00275636	Microglia (PCDH9high) -> Newly formed oligodendrocyte	Prefrontal cortex
650	Oligodendrocyte	Newly formed oligodendrocyte	COL4A5	ITGAV_ITGB8	0.231331	3	COL4A5_ITGAV_ITGB8	COL4A5 - (ITGAV+ITGB8)	COLLAGEN	ECM-Receptor	KEGG: hsa04512	Oligodendrocyte -> Newly formed oligodendrocyte (CC)	0.0132625	Oligodendrocyte -> Newly formed oligodendrocyte	Prefrontal cortex
651	Fibroblast	Newly formed oligodendrocyte	COL4A5	ITGAV_ITGB8	0.174961	3	COL4A5_ITGAV_ITGB8	COL4A5 - (ITGAV+ITGB8)	COLLAGEN	ECM-Receptor	KEGG: hsa04512	Fibroblast -> Newly formed oligodendrocyte (CC)	0.00329428	Fibroblast -> Newly formed oligodendrocyte	Prefrontal cortex
652	Microglia (PCDH9high)	Astrocyte	COL4A5	ITGAV_ITGB8	0.183071	3	COL4A5_ITGAV_ITGB8	COL4A5 - (ITGAV+ITGB8)	COLLAGEN	ECM-Receptor	KEGG: hsa04512	Microglia (PCDH9high) -> Astrocyte (CC)	0.00424349	Microglia (PCDH9high) -> Astrocyte	Prefrontal cortex
653	Oligodendrocyte	Astrocyte	COL4A5	ITGAV_ITGB8	0.256607	3	COL4A5_ITGAV_ITGB8	COL4A5 - (ITGAV+ITGB8)	COLLAGEN	ECM-Receptor	KEGG: hsa04512	Oligodendrocyte -> Astrocyte (CC)	0.0203026	Oligodendrocyte -> Astrocyte	Prefrontal cortex
654	Fibroblast	Astrocyte	COL4A5	ITGAV_ITGB8	0.189237	3	COL4A5_ITGAV_ITGB8	COL4A5 - (ITGAV+ITGB8)	COLLAGEN	ECM-Receptor	KEGG: hsa04512	Fibroblast -> Astrocyte (CC)	0.00507015	Fibroblast -> Astrocyte	Prefrontal cortex
2411	Oligodendrocyte	Microglia (PCDH9high)	COL4A5	ITGAV_ITGB8	0.196135	3	COL4A5_ITGAV_ITGB8	COL4A5 - (ITGAV+ITGB8)	COLLAGEN	ECM-Receptor	KEGG: hsa04512	Oligodendrocyte -> Microglia (PCDH9high) (Hippo)	0.00610574	Oligodendrocyte -> Microglia (PCDH9high)	Hippocampus
2412	Fibroblast	Microglia (PCDH9high)	COL4A5	ITGAV_ITGB8	0.183933	3	COL4A5_ITGAV_ITGB8	COL4A5 - (ITGAV+ITGB8)	COLLAGEN	ECM-Receptor	KEGG: hsa04512	Fibroblast -> Microglia (PCDH9high) (Hippo)	0.00435355	Fibroblast -> Microglia (PCDH9high)	Hippocampus
2413	Oligodendrocyte	Oligodendrocyte precursor	COL4A5	ITGAV_ITGB8	0.213139	3	COL4A5_ITGAV_ITGB8	COL4A5 - (ITGAV+ITGB8)	COLLAGEN	ECM-Receptor	KEGG: hsa04512	Oligodendrocyte -> Oligodendrocyte precursor (Hippo)	0.00917046	Oligodendrocyte -> Oligodendrocyte precursor	Hippocampus
2414	Fibroblast	Oligodendrocyte precursor	COL4A5	ITGAV_ITGB8	0.198842	3	COL4A5_ITGAV_ITGB8	COL4A5 - (ITGAV+ITGB8)	COLLAGEN	ECM-Receptor	KEGG: hsa04512	Fibroblast -> Oligodendrocyte precursor (Hippo)	0.00654457	Fibroblast -> Oligodendrocyte precursor	Hippocampus
2415	Oligodendrocyte	Newly formed oligodendrocyte	COL4A5	ITGAV_ITGB8	0.182487	3	COL4A5_ITGAV_ITGB8	COL4A5 - (ITGAV+ITGB8)	COLLAGEN	ECM-Receptor	KEGG: hsa04512	Oligodendrocyte -> Newly formed oligodendrocyte (Hippo)	0.00417001	Oligodendrocyte -> Newly formed oligodendrocyte	Hippocampus
2416	Fibroblast	Newly formed oligodendrocyte	COL4A5	ITGAV_ITGB8	0.171862	3	COL4A5_ITGAV_ITGB8	COL4A5 - (ITGAV+ITGB8)	COLLAGEN	ECM-Receptor	KEGG: hsa04512	Fibroblast -> Newly formed oligodendrocyte (Hippo)	0.00297166	Fibroblast -> Newly formed oligodendrocyte	Hippocampus
2417	Oligodendrocyte	Astrocyte	COL4A5	ITGAV_ITGB8	0.196805	3	COL4A5_ITGAV_ITGB8	COL4A5 - (ITGAV+ITGB8)	COLLAGEN	ECM-Receptor	KEGG: hsa04512	Oligodendrocyte -> Astrocyte (Hippo)	0.00621258	Oligodendrocyte -> Astrocyte	Hippocampus
2418	Fibroblast	Astrocyte	COL4A5	ITGAV_ITGB8	0.184523	3	COL4A5_ITGAV_ITGB8	COL4A5 - (ITGAV+ITGB8)	COLLAGEN	ECM-Receptor	KEGG: hsa04512	Fibroblast -> Astrocyte (Hippo)	0.00442987	Fibroblast -> Astrocyte	Hippocampus
2419	Oligodendrocyte	Glutamatergic	COL4A5	ITGAV_ITGB8	0.176429	3	COL4A5_ITGAV_ITGB8	COL4A5 - (ITGAV+ITGB8)	COLLAGEN	ECM-Receptor	KEGG: hsa04512	Oligodendrocyte -> Glutamatergic (Hippo)	0.00345475	Oligodendrocyte -> Glutamatergic	Hippocampus
2420	Fibroblast	Glutamatergic	COL4A5	ITGAV_ITGB8	0.166472	3	COL4A5_ITGAV_ITGB8	COL4A5 - (ITGAV+ITGB8)	COLLAGEN	ECM-Receptor	KEGG: hsa04512	Fibroblast -> Glutamatergic (Hippo)	0.00246145	Fibroblast -> Glutamatergic	Hippocampus
2502	Oligodendrocyte	Astrocyte	COL4A5	CD44	0.185911	3	COL4A5_CD44	COL4A5 - CD44	COLLAGEN	ECM-Receptor	KEGG: hsa04512	Oligodendrocyte -> Astrocyte (Hippo)	0.00461286	Oligodendrocyte -> Astrocyte	Hippocampus
2503	Fibroblast	Astrocyte	COL4A5	CD44	0.174899	3	COL4A5_CD44	COL4A5 - CD44	COLLAGEN	ECM-Receptor	KEGG: hsa04512	Fibroblast -> Astrocyte (Hippo)	0.00328767	Fibroblast -> Astrocyte	Hippocampus
712	Microglia (PCDH9high)	Astrocyte	COL4A5	SDC4	0.188133	3	COL4A5_SDC4	COL4A5 - SDC4	COLLAGEN	ECM-Receptor	KEGG: hsa04512	Microglia (PCDH9high) -> Astrocyte (CC)	0.00491542	Microglia (PCDH9high) -> Astrocyte	Prefrontal cortex
713	Oligodendrocyte	Astrocyte	COL4A5	SDC4	0.266484	3	COL4A5_SDC4	COL4A5 - SDC4	COLLAGEN	ECM-Receptor	KEGG: hsa04512	Oligodendrocyte -> Astrocyte (CC)	0.0234574	Oligodendrocyte -> Astrocyte	Prefrontal cortex
714	Fibroblast	Astrocyte	COL4A5	SDC4	0.194646	3	COL4A5_SDC4	COL4A5 - SDC4	COLLAGEN	ECM-Receptor	KEGG: hsa04512	Fibroblast -> Astrocyte (CC)	0.00587221	Fibroblast -> Astrocyte	Prefrontal cortex
2547	Oligodendrocyte	Astrocyte	COL4A5	SDC4	0.193543	3	COL4A5_SDC4	COL4A5 - SDC4	COLLAGEN	ECM-Receptor	KEGG: hsa04512	Oligodendrocyte -> Astrocyte (Hippo)	0.00570279	Oligodendrocyte -> Astrocyte	Hippocampus
2548	Fibroblast	Astrocyte	COL4A5	SDC4	0.181648	3	COL4A5_SDC4	COL4A5 - SDC4	COLLAGEN	ECM-Receptor	KEGG: hsa04512	Fibroblast -> Astrocyte (Hippo)	0.00406576	Fibroblast -> Astrocyte	Hippocampus
436	Vascular leptomeningeal cell	Vascular leptomeningeal cell	COL6A1	ITGA1_ITGB1	0.200743	3	COL6A1_ITGA1_ITGB1	COL6A1 - (ITGA1+ITGB1)	COLLAGEN	ECM-Receptor	KEGG: hsa04512	Vascular leptomeningeal cell -> Vascular leptomeningeal cell (CC)	0.00686383	Vascular leptomeningeal cell -> Vascular leptomeningeal cell	Prefrontal cortex
437	Fibroblast	Vascular leptomeningeal cell	COL6A1	ITGA1_ITGB1	0.191249	3	COL6A1_ITGA1_ITGB1	COL6A1 - (ITGA1+ITGB1)	COLLAGEN	ECM-Receptor	KEGG: hsa04512	Fibroblast -> Vascular leptomeningeal cell (CC)	0.00535997	Fibroblast -> Vascular leptomeningeal cell	Prefrontal cortex
438	Glutamatergic	Vascular leptomeningeal cell	COL6A1	ITGA1_ITGB1	0.171126	3	COL6A1_ITGA1_ITGB1	COL6A1 - (ITGA1+ITGB1)	COLLAGEN	ECM-Receptor	KEGG: hsa04512	Glutamatergic -> Vascular leptomeningeal cell (CC)	0.00289824	Glutamatergic -> Vascular leptomeningeal cell	Prefrontal cortex
439	Vascular leptomeningeal cell	Endothelial	COL6A1	ITGA1_ITGB1	0.247251	3	COL6A1_ITGA1_ITGB1	COL6A1 - (ITGA1+ITGB1)	COLLAGEN	ECM-Receptor	KEGG: hsa04512	Vascular leptomeningeal cell -> Endothelial (CC)	0.017519	Vascular leptomeningeal cell -> Endothelial	Prefrontal cortex
440	Fibroblast	Endothelial	COL6A1	ITGA1_ITGB1	0.233132	3	COL6A1_ITGA1_ITGB1	COL6A1 - (ITGA1+ITGB1)	COLLAGEN	ECM-Receptor	KEGG: hsa04512	Fibroblast -> Endothelial (CC)	0.0137129	Fibroblast -> Endothelial	Prefrontal cortex
441	Glutamatergic	Endothelial	COL6A1	ITGA1_ITGB1	0.204064	3	COL6A1_ITGA1_ITGB1	COL6A1 - (ITGA1+ITGB1)	COLLAGEN	ECM-Receptor	KEGG: hsa04512	Glutamatergic -> Endothelial (CC)	0.00744351	Glutamatergic -> Endothelial	Prefrontal cortex
1989	Vascular leptomeningeal cell	Vascular leptomeningeal cell	COL6A1	ITGA1_ITGB1	0.196053	3	COL6A1_ITGA1_ITGB1	COL6A1 - (ITGA1+ITGB1)	COLLAGEN	ECM-Receptor	KEGG: hsa04512	Vascular leptomeningeal cell -> Vascular leptomeningeal cell (Hippo)	0.00609265	Vascular leptomeningeal cell -> Vascular leptomeningeal cell	Hippocampus
1990	Fibroblast	Vascular leptomeningeal cell	COL6A1	ITGA1_ITGB1	0.194478	3	COL6A1_ITGA1_ITGB1	COL6A1 - (ITGA1+ITGB1)	COLLAGEN	ECM-Receptor	KEGG: hsa04512	Fibroblast -> Vascular leptomeningeal cell (Hippo)	0.00584612	Fibroblast -> Vascular leptomeningeal cell	Hippocampus
1991	Vascular leptomeningeal cell	Endothelial	COL6A1	ITGA1_ITGB1	0.236739	3	COL6A1_ITGA1_ITGB1	COL6A1 - (ITGA1+ITGB1)	COLLAGEN	ECM-Receptor	KEGG: hsa04512	Vascular leptomeningeal cell -> Endothelial (Hippo)	0.0146389	Vascular leptomeningeal cell -> Endothelial	Hippocampus
1992	Fibroblast	Endothelial	COL6A1	ITGA1_ITGB1	0.234465	3	COL6A1_ITGA1_ITGB1	COL6A1 - (ITGA1+ITGB1)	COLLAGEN	ECM-Receptor	KEGG: hsa04512	Fibroblast -> Endothelial (Hippo)	0.0140515	Fibroblast -> Endothelial	Hippocampus
540	Vascular leptomeningeal cell	Vascular leptomeningeal cell	COL6A1	ITGA10_ITGB1	0.188901	3	COL6A1_ITGA10_ITGB1	COL6A1 - (ITGA10+ITGB1)	COLLAGEN	ECM-Receptor	KEGG: hsa04512	Vascular leptomeningeal cell -> Vascular leptomeningeal cell (CC)	0.00502268	Vascular leptomeningeal cell -> Vascular leptomeningeal cell	Prefrontal cortex
541	Fibroblast	Vascular leptomeningeal cell	COL6A1	ITGA10_ITGB1	0.180456	3	COL6A1_ITGA10_ITGB1	COL6A1 - (ITGA10+ITGB1)	COLLAGEN	ECM-Receptor	KEGG: hsa04512	Fibroblast -> Vascular leptomeningeal cell (CC)	0.00392062	Fibroblast -> Vascular leptomeningeal cell	Prefrontal cortex
542	Glutamatergic	Vascular leptomeningeal cell	COL6A1	ITGA10_ITGB1	0.162416	3	COL6A1_ITGA10_ITGB1	COL6A1 - (ITGA10+ITGB1)	COLLAGEN	ECM-Receptor	KEGG: hsa04512	Glutamatergic -> Vascular leptomeningeal cell (CC)	0.00211855	Glutamatergic -> Vascular leptomeningeal cell	Prefrontal cortex
2167	Vascular leptomeningeal cell	GABAergic	COL6A1	ITGA9_ITGB1	0.153713	3	COL6A1_ITGA9_ITGB1	COL6A1 - (ITGA9+ITGB1)	COLLAGEN	ECM-Receptor	KEGG: hsa04512	Vascular leptomeningeal cell -> GABAergic (Hippo)	0.00149499	Vascular leptomeningeal cell -> GABAergic	Hippocampus
2168	Fibroblast	GABAergic	COL6A1	ITGA9_ITGB1	0.152739	3	COL6A1_ITGA9_ITGB1	COL6A1 - (ITGA9+ITGB1)	COLLAGEN	ECM-Receptor	KEGG: hsa04512	Fibroblast -> GABAergic (Hippo)	0.00143423	Fibroblast -> GABAergic	Hippocampus
2169	Vascular leptomeningeal cell	Glutamatergic	COL6A1	ITGA9_ITGB1	0.182541	3	COL6A1_ITGA9_ITGB1	COL6A1 - (ITGA9+ITGB1)	COLLAGEN	ECM-Receptor	KEGG: hsa04512	Vascular leptomeningeal cell -> Glutamatergic (Hippo)	0.00417674	Vascular leptomeningeal cell -> Glutamatergic	Hippocampus
2170	Fibroblast	Glutamatergic	COL6A1	ITGA9_ITGB1	0.181172	3	COL6A1_ITGA9_ITGB1	COL6A1 - (ITGA9+ITGB1)	COLLAGEN	ECM-Receptor	KEGG: hsa04512	Fibroblast -> Glutamatergic (Hippo)	0.00400742	Fibroblast -> Glutamatergic	Hippocampus
655	Vascular leptomeningeal cell	Oligodendrocyte precursor	COL6A1	ITGAV_ITGB8	0.21067	3	COL6A1_ITGAV_ITGB8	COL6A1 - (ITGAV+ITGB8)	COLLAGEN	ECM-Receptor	KEGG: hsa04512	Vascular leptomeningeal cell -> Oligodendrocyte precursor (CC)	0.00867973	Vascular leptomeningeal cell -> Oligodendrocyte precursor	Prefrontal cortex
656	Fibroblast	Oligodendrocyte precursor	COL6A1	ITGAV_ITGB8	0.200253	3	COL6A1_ITGAV_ITGB8	COL6A1 - (ITGAV+ITGB8)	COLLAGEN	ECM-Receptor	KEGG: hsa04512	Fibroblast -> Oligodendrocyte precursor (CC)	0.00678072	Fibroblast -> Oligodendrocyte precursor	Prefrontal cortex
657	Glutamatergic	Oligodendrocyte precursor	COL6A1	ITGAV_ITGB8	0.178321	3	COL6A1_ITGAV_ITGB8	COL6A1 - (ITGAV+ITGB8)	COLLAGEN	ECM-Receptor	KEGG: hsa04512	Glutamatergic -> Oligodendrocyte precursor (CC)	0.00366887	Glutamatergic -> Oligodendrocyte precursor	Prefrontal cortex
658	Vascular leptomeningeal cell	Newly formed oligodendrocyte	COL6A1	ITGAV_ITGB8	0.181288	3	COL6A1_ITGAV_ITGB8	COL6A1 - (ITGAV+ITGB8)	COLLAGEN	ECM-Receptor	KEGG: hsa04512	Vascular leptomeningeal cell -> Newly formed oligodendrocyte (CC)	0.00402153	Vascular leptomeningeal cell -> Newly formed oligodendrocyte	Prefrontal cortex
659	Fibroblast	Newly formed oligodendrocyte	COL6A1	ITGAV_ITGB8	0.17349	3	COL6A1_ITGAV_ITGB8	COL6A1 - (ITGAV+ITGB8)	COLLAGEN	ECM-Receptor	KEGG: hsa04512	Fibroblast -> Newly formed oligodendrocyte (CC)	0.00313845	Fibroblast -> Newly formed oligodendrocyte	Prefrontal cortex
660	Glutamatergic	Newly formed oligodendrocyte	COL6A1	ITGAV_ITGB8	0.156742	3	COL6A1_ITGAV_ITGB8	COL6A1 - (ITGAV+ITGB8)	COLLAGEN	ECM-Receptor	KEGG: hsa04512	Glutamatergic -> Newly formed oligodendrocyte (CC)	0.00169528	Glutamatergic -> Newly formed oligodendrocyte	Prefrontal cortex
661	Vascular leptomeningeal cell	Astrocyte	COL6A1	ITGAV_ITGB8	0.196645	3	COL6A1_ITGAV_ITGB8	COL6A1 - (ITGAV+ITGB8)	COLLAGEN	ECM-Receptor	KEGG: hsa04512	Vascular leptomeningeal cell -> Astrocyte (CC)	0.00618701	Vascular leptomeningeal cell -> Astrocyte	Prefrontal cortex
662	Fibroblast	Astrocyte	COL6A1	ITGAV_ITGB8	0.18752	3	COL6A1_ITGAV_ITGB8	COL6A1 - (ITGAV+ITGB8)	COLLAGEN	ECM-Receptor	KEGG: hsa04512	Fibroblast -> Astrocyte (CC)	0.00483072	Fibroblast -> Astrocyte	Prefrontal cortex
663	Glutamatergic	Astrocyte	COL6A1	ITGAV_ITGB8	0.168128	3	COL6A1_ITGAV_ITGB8	COL6A1 - (ITGAV+ITGB8)	COLLAGEN	ECM-Receptor	KEGG: hsa04512	Glutamatergic -> Astrocyte (CC)	0.00261143	Glutamatergic -> Astrocyte	Prefrontal cortex
2421	Vascular leptomeningeal cell	Microglia (PCDH9high)	COL6A1	ITGAV_ITGB8	0.185418	3	COL6A1_ITGAV_ITGB8	COL6A1 - (ITGAV+ITGB8)	COLLAGEN	ECM-Receptor	KEGG: hsa04512	Vascular leptomeningeal cell -> Microglia (PCDH9high) (Hippo)	0.00454726	Vascular leptomeningeal cell -> Microglia (PCDH9high)	Hippocampus
2422	Fibroblast	Microglia (PCDH9high)	COL6A1	ITGAV_ITGB8	0.184006	3	COL6A1_ITGAV_ITGB8	COL6A1 - (ITGAV+ITGB8)	COLLAGEN	ECM-Receptor	KEGG: hsa04512	Fibroblast -> Microglia (PCDH9high) (Hippo)	0.00436299	Fibroblast -> Microglia (PCDH9high)	Hippocampus
2423	Vascular leptomeningeal cell	Oligodendrocyte precursor	COL6A1	ITGAV_ITGB8	0.200574	3	COL6A1_ITGAV_ITGB8	COL6A1 - (ITGAV+ITGB8)	COLLAGEN	ECM-Receptor	KEGG: hsa04512	Vascular leptomeningeal cell -> Oligodendrocyte precursor (Hippo)	0.0068351	Vascular leptomeningeal cell -> Oligodendrocyte precursor	Hippocampus
2424	Fibroblast	Oligodendrocyte precursor	COL6A1	ITGAV_ITGB8	0.198927	3	COL6A1_ITGAV_ITGB8	COL6A1 - (ITGAV+ITGB8)	COLLAGEN	ECM-Receptor	KEGG: hsa04512	Fibroblast -> Oligodendrocyte precursor (Hippo)	0.00655873	Fibroblast -> Oligodendrocyte precursor	Hippocampus
2425	Vascular leptomeningeal cell	Newly formed oligodendrocyte	COL6A1	ITGAV_ITGB8	0.173159	3	COL6A1_ITGAV_ITGB8	COL6A1 - (ITGAV+ITGB8)	COLLAGEN	ECM-Receptor	KEGG: hsa04512	Vascular leptomeningeal cell -> Newly formed oligodendrocyte (Hippo)	0.00310408	Vascular leptomeningeal cell -> Newly formed oligodendrocyte	Hippocampus
2426	Fibroblast	Newly formed oligodendrocyte	COL6A1	ITGAV_ITGB8	0.171926	3	COL6A1_ITGAV_ITGB8	COL6A1 - (ITGAV+ITGB8)	COLLAGEN	ECM-Receptor	KEGG: hsa04512	Fibroblast -> Newly formed oligodendrocyte (Hippo)	0.00297811	Fibroblast -> Newly formed oligodendrocyte	Hippocampus
2427	Vascular leptomeningeal cell	Astrocyte	COL6A1	ITGAV_ITGB8	0.186017	3	COL6A1_ITGAV_ITGB8	COL6A1 - (ITGAV+ITGB8)	COLLAGEN	ECM-Receptor	KEGG: hsa04512	Vascular leptomeningeal cell -> Astrocyte (Hippo)	0.00462696	Vascular leptomeningeal cell -> Astrocyte	Hippocampus
2428	Fibroblast	Astrocyte	COL6A1	ITGAV_ITGB8	0.184597	3	COL6A1_ITGAV_ITGB8	COL6A1 - (ITGAV+ITGB8)	COLLAGEN	ECM-Receptor	KEGG: hsa04512	Fibroblast -> Astrocyte (Hippo)	0.00443947	Fibroblast -> Astrocyte	Hippocampus
2429	Vascular leptomeningeal cell	Glutamatergic	COL6A1	ITGAV_ITGB8	0.16769	3	COL6A1_ITGAV_ITGB8	COL6A1 - (ITGAV+ITGB8)	COLLAGEN	ECM-Receptor	KEGG: hsa04512	Vascular leptomeningeal cell -> Glutamatergic (Hippo)	0.00257118	Vascular leptomeningeal cell -> Glutamatergic	Hippocampus
2430	Fibroblast	Glutamatergic	COL6A1	ITGAV_ITGB8	0.166532	3	COL6A1_ITGAV_ITGB8	COL6A1 - (ITGAV+ITGB8)	COLLAGEN	ECM-Receptor	KEGG: hsa04512	Fibroblast -> Glutamatergic (Hippo)	0.00246679	Fibroblast -> Glutamatergic	Hippocampus
2504	Vascular leptomeningeal cell	Astrocyte	COL6A1	CD44	0.176243	3	COL6A1_CD44	COL6A1 - CD44	COLLAGEN	ECM-Receptor	KEGG: hsa04512	Vascular leptomeningeal cell -> Astrocyte (Hippo)	0.00343412	Vascular leptomeningeal cell -> Astrocyte	Hippocampus
2505	Fibroblast	Astrocyte	COL6A1	CD44	0.174966	3	COL6A1_CD44	COL6A1 - CD44	COLLAGEN	ECM-Receptor	KEGG: hsa04512	Fibroblast -> Astrocyte (Hippo)	0.00329481	Fibroblast -> Astrocyte	Hippocampus
715	Vascular leptomeningeal cell	Astrocyte	COL6A1	SDC4	0.202486	3	COL6A1_SDC4	COL6A1 - SDC4	COLLAGEN	ECM-Receptor	KEGG: hsa04512	Vascular leptomeningeal cell -> Astrocyte (CC)	0.00716447	Vascular leptomeningeal cell -> Astrocyte	Prefrontal cortex
716	Fibroblast	Astrocyte	COL6A1	SDC4	0.192832	3	COL6A1_SDC4	COL6A1 - SDC4	COLLAGEN	ECM-Receptor	KEGG: hsa04512	Fibroblast -> Astrocyte (CC)	0.00559511	Fibroblast -> Astrocyte	Prefrontal cortex
717	Glutamatergic	Astrocyte	COL6A1	SDC4	0.172396	3	COL6A1_SDC4	COL6A1 - SDC4	COLLAGEN	ECM-Receptor	KEGG: hsa04512	Glutamatergic -> Astrocyte (CC)	0.00302571	Glutamatergic -> Astrocyte	Prefrontal cortex
2549	Vascular leptomeningeal cell	Astrocyte	COL6A1	SDC4	0.183096	3	COL6A1_SDC4	COL6A1 - SDC4	COLLAGEN	ECM-Receptor	KEGG: hsa04512	Vascular leptomeningeal cell -> Astrocyte (Hippo)	0.00424672	Vascular leptomeningeal cell -> Astrocyte	Hippocampus
2550	Fibroblast	Astrocyte	COL6A1	SDC4	0.181719	3	COL6A1_SDC4	COL6A1 - SDC4	COLLAGEN	ECM-Receptor	KEGG: hsa04512	Fibroblast -> Astrocyte (Hippo)	0.00407458	Fibroblast -> Astrocyte	Hippocampus
442	Vascular leptomeningeal cell	Vascular leptomeningeal cell	COL6A2	ITGA1_ITGB1	0.201084	3	COL6A2_ITGA1_ITGB1	COL6A2 - (ITGA1+ITGB1)	COLLAGEN	ECM-Receptor	KEGG: hsa04512	Vascular leptomeningeal cell -> Vascular leptomeningeal cell (CC)	0.00692195	Vascular leptomeningeal cell -> Vascular leptomeningeal cell	Prefrontal cortex
443	Fibroblast	Vascular leptomeningeal cell	COL6A2	ITGA1_ITGB1	0.197174	3	COL6A2_ITGA1_ITGB1	COL6A2 - (ITGA1+ITGB1)	COLLAGEN	ECM-Receptor	KEGG: hsa04512	Fibroblast -> Vascular leptomeningeal cell (CC)	0.00627197	Fibroblast -> Vascular leptomeningeal cell	Prefrontal cortex
444	Vascular leptomeningeal cell	Endothelial	COL6A2	ITGA1_ITGB1	0.247762	3	COL6A2_ITGA1_ITGB1	COL6A2 - (ITGA1+ITGB1)	COLLAGEN	ECM-Receptor	KEGG: hsa04512	Vascular leptomeningeal cell -> Endothelial (CC)	0.0176658	Vascular leptomeningeal cell -> Endothelial	Prefrontal cortex
445	Fibroblast	Endothelial	COL6A2	ITGA1_ITGB1	0.241913	3	COL6A2_ITGA1_ITGB1	COL6A2 - (ITGA1+ITGB1)	COLLAGEN	ECM-Receptor	KEGG: hsa04512	Fibroblast -> Endothelial (CC)	0.0160232	Fibroblast -> Endothelial	Prefrontal cortex
1993	Vascular leptomeningeal cell	Vascular leptomeningeal cell	COL6A2	ITGA1_ITGB1	0.198619	3	COL6A2_ITGA1_ITGB1	COL6A2 - (ITGA1+ITGB1)	COLLAGEN	ECM-Receptor	KEGG: hsa04512	Vascular leptomeningeal cell -> Vascular leptomeningeal cell (Hippo)	0.0065077	Vascular leptomeningeal cell -> Vascular leptomeningeal cell	Hippocampus
1994	Fibroblast	Vascular leptomeningeal cell	COL6A2	ITGA1_ITGB1	0.195292	3	COL6A2_ITGA1_ITGB1	COL6A2 - (ITGA1+ITGB1)	COLLAGEN	ECM-Receptor	KEGG: hsa04512	Fibroblast -> Vascular leptomeningeal cell (Hippo)	0.00597274	Fibroblast -> Vascular leptomeningeal cell	Hippocampus
1995	Vascular leptomeningeal cell	Endothelial	COL6A2	ITGA1_ITGB1	0.240457	3	COL6A2_ITGA1_ITGB1	COL6A2 - (ITGA1+ITGB1)	COLLAGEN	ECM-Receptor	KEGG: hsa04512	Vascular leptomeningeal cell -> Endothelial (Hippo)	0.015627	Vascular leptomeningeal cell -> Endothelial	Hippocampus
1996	Fibroblast	Endothelial	COL6A2	ITGA1_ITGB1	0.235639	3	COL6A2_ITGA1_ITGB1	COL6A2 - (ITGA1+ITGB1)	COLLAGEN	ECM-Receptor	KEGG: hsa04512	Fibroblast -> Endothelial (Hippo)	0.0143532	Fibroblast -> Endothelial	Hippocampus
543	Vascular leptomeningeal cell	Vascular leptomeningeal cell	COL6A2	ITGA10_ITGB1	0.189202	3	COL6A2_ITGA10_ITGB1	COL6A2 - (ITGA10+ITGB1)	COLLAGEN	ECM-Receptor	KEGG: hsa04512	Vascular leptomeningeal cell -> Vascular leptomeningeal cell (CC)	0.00506529	Vascular leptomeningeal cell -> Vascular leptomeningeal cell	Prefrontal cortex
544	Fibroblast	Vascular leptomeningeal cell	COL6A2	ITGA10_ITGB1	0.185731	3	COL6A2_ITGA10_ITGB1	COL6A2 - (ITGA10+ITGB1)	COLLAGEN	ECM-Receptor	KEGG: hsa04512	Fibroblast -> Vascular leptomeningeal cell (CC)	0.00458885	Fibroblast -> Vascular leptomeningeal cell	Prefrontal cortex
2171	Vascular leptomeningeal cell	GABAergic	COL6A2	ITGA9_ITGB1	0.155293	3	COL6A2_ITGA9_ITGB1	COL6A2 - (ITGA9+ITGB1)	COLLAGEN	ECM-Receptor	KEGG: hsa04512	Vascular leptomeningeal cell -> GABAergic (Hippo)	0.00159733	Vascular leptomeningeal cell -> GABAergic	Hippocampus
2172	Fibroblast	GABAergic	COL6A2	ITGA9_ITGB1	0.153242	3	COL6A2_ITGA9_ITGB1	COL6A2 - (ITGA9+ITGB1)	COLLAGEN	ECM-Receptor	KEGG: hsa04512	Fibroblast -> GABAergic (Hippo)	0.00146543	Fibroblast -> GABAergic	Hippocampus
2173	Vascular leptomeningeal cell	Glutamatergic	COL6A2	ITGA9_ITGB1	0.184768	3	COL6A2_ITGA9_ITGB1	COL6A2 - (ITGA9+ITGB1)	COLLAGEN	ECM-Receptor	KEGG: hsa04512	Vascular leptomeningeal cell -> Glutamatergic (Hippo)	0.00446185	Vascular leptomeningeal cell -> Glutamatergic	Hippocampus
2174	Fibroblast	Glutamatergic	COL6A2	ITGA9_ITGB1	0.18188	3	COL6A2_ITGA9_ITGB1	COL6A2 - (ITGA9+ITGB1)	COLLAGEN	ECM-Receptor	KEGG: hsa04512	Fibroblast -> Glutamatergic (Hippo)	0.00409437	Fibroblast -> Glutamatergic	Hippocampus
664	Vascular leptomeningeal cell	Oligodendrocyte precursor	COL6A2	ITGAV_ITGB8	0.211044	3	COL6A2_ITGAV_ITGB8	COL6A2 - (ITGAV+ITGB8)	COLLAGEN	ECM-Receptor	KEGG: hsa04512	Vascular leptomeningeal cell -> Oligodendrocyte precursor (CC)	0.00875309	Vascular leptomeningeal cell -> Oligodendrocyte precursor	Prefrontal cortex
665	Fibroblast	Oligodendrocyte precursor	COL6A2	ITGAV_ITGB8	0.206749	3	COL6A2_ITGAV_ITGB8	COL6A2 - (ITGAV+ITGB8)	COLLAGEN	ECM-Receptor	KEGG: hsa04512	Fibroblast -> Oligodendrocyte precursor (CC)	0.00793253	Fibroblast -> Oligodendrocyte precursor	Prefrontal cortex
666	Vascular leptomeningeal cell	Newly formed oligodendrocyte	COL6A2	ITGAV_ITGB8	0.181566	3	COL6A2_ITGAV_ITGB8	COL6A2 - (ITGAV+ITGB8)	COLLAGEN	ECM-Receptor	KEGG: hsa04512	Vascular leptomeningeal cell -> Newly formed oligodendrocyte (CC)	0.00405568	Vascular leptomeningeal cell -> Newly formed oligodendrocyte	Prefrontal cortex
667	Fibroblast	Newly formed oligodendrocyte	COL6A2	ITGAV_ITGB8	0.178364	3	COL6A2_ITGAV_ITGB8	COL6A2 - (ITGAV+ITGB8)	COLLAGEN	ECM-Receptor	KEGG: hsa04512	Fibroblast -> Newly formed oligodendrocyte (CC)	0.00367385	Fibroblast -> Newly formed oligodendrocyte	Prefrontal cortex
668	Vascular leptomeningeal cell	Astrocyte	COL6A2	ITGAV_ITGB8	0.196972	3	COL6A2_ITGAV_ITGB8	COL6A2 - (ITGAV+ITGB8)	COLLAGEN	ECM-Receptor	KEGG: hsa04512	Vascular leptomeningeal cell -> Astrocyte (CC)	0.00623943	Vascular leptomeningeal cell -> Astrocyte	Prefrontal cortex
669	Fibroblast	Astrocyte	COL6A2	ITGAV_ITGB8	0.193217	3	COL6A2_ITGAV_ITGB8	COL6A2 - (ITGAV+ITGB8)	COLLAGEN	ECM-Receptor	KEGG: hsa04512	Fibroblast -> Astrocyte (CC)	0.00565318	Fibroblast -> Astrocyte	Prefrontal cortex
2431	Vascular leptomeningeal cell	Microglia (PCDH9high)	COL6A2	ITGAV_ITGB8	0.187715	3	COL6A2_ITGAV_ITGB8	COL6A2 - (ITGAV+ITGB8)	COLLAGEN	ECM-Receptor	KEGG: hsa04512	Vascular leptomeningeal cell -> Microglia (PCDH9high) (Hippo)	0.00485754	Vascular leptomeningeal cell -> Microglia (PCDH9high)	Hippocampus
2432	Fibroblast	Microglia (PCDH9high)	COL6A2	ITGAV_ITGB8	0.184736	3	COL6A2_ITGAV_ITGB8	COL6A2 - (ITGAV+ITGB8)	COLLAGEN	ECM-Receptor	KEGG: hsa04512	Fibroblast -> Microglia (PCDH9high) (Hippo)	0.00445762	Fibroblast -> Microglia (PCDH9high)	Hippocampus
2433	Vascular leptomeningeal cell	Oligodendrocyte precursor	COL6A2	ITGAV_ITGB8	0.203259	3	COL6A2_ITGAV_ITGB8	COL6A2 - (ITGAV+ITGB8)	COLLAGEN	ECM-Receptor	KEGG: hsa04512	Vascular leptomeningeal cell -> Oligodendrocyte precursor (Hippo)	0.00730035	Vascular leptomeningeal cell -> Oligodendrocyte precursor	Hippocampus
2434	Fibroblast	Oligodendrocyte precursor	COL6A2	ITGAV_ITGB8	0.199778	3	COL6A2_ITGAV_ITGB8	COL6A2 - (ITGAV+ITGB8)	COLLAGEN	ECM-Receptor	KEGG: hsa04512	Fibroblast -> Oligodendrocyte precursor (Hippo)	0.00670067	Fibroblast -> Oligodendrocyte precursor	Hippocampus
2435	Vascular leptomeningeal cell	Newly formed oligodendrocyte	COL6A2	ITGAV_ITGB8	0.175164	3	COL6A2_ITGAV_ITGB8	COL6A2 - (ITGAV+ITGB8)	COLLAGEN	ECM-Receptor	KEGG: hsa04512	Vascular leptomeningeal cell -> Newly formed oligodendrocyte (Hippo)	0.00331621	Vascular leptomeningeal cell -> Newly formed oligodendrocyte	Hippocampus
2436	Fibroblast	Newly formed oligodendrocyte	COL6A2	ITGAV_ITGB8	0.172563	3	COL6A2_ITGAV_ITGB8	COL6A2 - (ITGAV+ITGB8)	COLLAGEN	ECM-Receptor	KEGG: hsa04512	Fibroblast -> Newly formed oligodendrocyte (Hippo)	0.0030428	Fibroblast -> Newly formed oligodendrocyte	Hippocampus
2437	Vascular leptomeningeal cell	Astrocyte	COL6A2	ITGAV_ITGB8	0.188329	3	COL6A2_ITGAV_ITGB8	COL6A2 - (ITGAV+ITGB8)	COLLAGEN	ECM-Receptor	KEGG: hsa04512	Vascular leptomeningeal cell -> Astrocyte (Hippo)	0.00494265	Vascular leptomeningeal cell -> Astrocyte	Hippocampus
2438	Fibroblast	Astrocyte	COL6A2	ITGAV_ITGB8	0.185331	3	COL6A2_ITGAV_ITGB8	COL6A2 - (ITGAV+ITGB8)	COLLAGEN	ECM-Receptor	KEGG: hsa04512	Fibroblast -> Astrocyte (Hippo)	0.00453576	Fibroblast -> Astrocyte	Hippocampus
2439	Vascular leptomeningeal cell	Glutamatergic	COL6A2	ITGAV_ITGB8	0.169571	3	COL6A2_ITGAV_ITGB8	COL6A2 - (ITGAV+ITGB8)	COLLAGEN	ECM-Receptor	KEGG: hsa04512	Vascular leptomeningeal cell -> Glutamatergic (Hippo)	0.002747	Vascular leptomeningeal cell -> Glutamatergic	Hippocampus
2440	Fibroblast	Glutamatergic	COL6A2	ITGAV_ITGB8	0.167131	3	COL6A2_ITGAV_ITGB8	COL6A2 - (ITGAV+ITGB8)	COLLAGEN	ECM-Receptor	KEGG: hsa04512	Fibroblast -> Glutamatergic (Hippo)	0.0025204	Fibroblast -> Glutamatergic	Hippocampus
2506	Vascular leptomeningeal cell	Astrocyte	COL6A2	CD44	0.17832	3	COL6A2_CD44	COL6A2 - CD44	COLLAGEN	ECM-Receptor	KEGG: hsa04512	Vascular leptomeningeal cell -> Astrocyte (Hippo)	0.00366872	Vascular leptomeningeal cell -> Astrocyte	Hippocampus
2507	Fibroblast	Astrocyte	COL6A2	CD44	0.175626	3	COL6A2_CD44	COL6A2 - CD44	COLLAGEN	ECM-Receptor	KEGG: hsa04512	Fibroblast -> Astrocyte (Hippo)	0.00336635	Fibroblast -> Astrocyte	Hippocampus
718	Vascular leptomeningeal cell	Astrocyte	COL6A2	SDC4	0.202832	3	COL6A2_SDC4	COL6A2 - SDC4	COLLAGEN	ECM-Receptor	KEGG: hsa04512	Vascular leptomeningeal cell -> Astrocyte (CC)	0.00722511	Vascular leptomeningeal cell -> Astrocyte	Prefrontal cortex
719	Fibroblast	Astrocyte	COL6A2	SDC4	0.198856	3	COL6A2_SDC4	COL6A2 - SDC4	COLLAGEN	ECM-Receptor	KEGG: hsa04512	Fibroblast -> Astrocyte (CC)	0.00654685	Fibroblast -> Astrocyte	Prefrontal cortex
2551	Vascular leptomeningeal cell	Astrocyte	COL6A2	SDC4	0.185337	3	COL6A2_SDC4	COL6A2 - SDC4	COLLAGEN	ECM-Receptor	KEGG: hsa04512	Vascular leptomeningeal cell -> Astrocyte (Hippo)	0.00453659	Vascular leptomeningeal cell -> Astrocyte	Hippocampus
2552	Fibroblast	Astrocyte	COL6A2	SDC4	0.182431	3	COL6A2_SDC4	COL6A2 - SDC4	COLLAGEN	ECM-Receptor	KEGG: hsa04512	Fibroblast -> Astrocyte (Hippo)	0.00416298	Fibroblast -> Astrocyte	Hippocampus
446	Fibroblast	Vascular leptomeningeal cell	COL6A3	ITGA1_ITGB1	0.187548	3	COL6A3_ITGA1_ITGB1	COL6A3 - (ITGA1+ITGB1)	COLLAGEN	ECM-Receptor	KEGG: hsa04512	Fibroblast -> Vascular leptomeningeal cell (CC)	0.00483461	Fibroblast -> Vascular leptomeningeal cell	Prefrontal cortex
447	Fibroblast	Endothelial	COL6A3	ITGA1_ITGB1	0.227699	3	COL6A3_ITGA1_ITGB1	COL6A3 - (ITGA1+ITGB1)	COLLAGEN	ECM-Receptor	KEGG: hsa04512	Fibroblast -> Endothelial (CC)	0.012379	Fibroblast -> Endothelial	Prefrontal cortex
1997	Fibroblast	Vascular leptomeningeal cell	COL6A3	ITGA1_ITGB1	0.204192	3	COL6A3_ITGA1_ITGB1	COL6A3 - (ITGA1+ITGB1)	COLLAGEN	ECM-Receptor	KEGG: hsa04512	Fibroblast -> Vascular leptomeningeal cell (Hippo)	0.00746635	Fibroblast -> Vascular leptomeningeal cell	Hippocampus
1998	Glutamatergic	Vascular leptomeningeal cell	COL6A3	ITGA1_ITGB1	0.163618	3	COL6A3_ITGA1_ITGB1	COL6A3 - (ITGA1+ITGB1)	COLLAGEN	ECM-Receptor	KEGG: hsa04512	Glutamatergic -> Vascular leptomeningeal cell (Hippo)	0.0022166	Glutamatergic -> Vascular leptomeningeal cell	Hippocampus
1999	Fibroblast	Endothelial	COL6A3	ITGA1_ITGB1	0.24859	3	COL6A3_ITGA1_ITGB1	COL6A3 - (ITGA1+ITGB1)	COLLAGEN	ECM-Receptor	KEGG: hsa04512	Fibroblast -> Endothelial (Hippo)	0.0179048	Fibroblast -> Endothelial	Hippocampus
2000	Glutamatergic	Endothelial	COL6A3	ITGA1_ITGB1	0.191216	3	COL6A3_ITGA1_ITGB1	COL6A3 - (ITGA1+ITGB1)	COLLAGEN	ECM-Receptor	KEGG: hsa04512	Glutamatergic -> Endothelial (Hippo)	0.00535518	Glutamatergic -> Endothelial	Hippocampus
545	Fibroblast	Vascular leptomeningeal cell	COL6A3	ITGA10_ITGB1	0.177154	3	COL6A3_ITGA10_ITGB1	COL6A3 - (ITGA10+ITGB1)	COLLAGEN	ECM-Receptor	KEGG: hsa04512	Fibroblast -> Vascular leptomeningeal cell (CC)	0.00353584	Fibroblast -> Vascular leptomeningeal cell	Prefrontal cortex
2175	Fibroblast	GABAergic	COL6A3	ITGA9_ITGB1	0.158698	3	COL6A3_ITGA9_ITGB1	COL6A3 - (ITGA9+ITGB1)	COLLAGEN	ECM-Receptor	KEGG: hsa04512	Fibroblast -> GABAergic (Hippo)	0.00183397	Fibroblast -> GABAergic	Hippocampus
2176	Glutamatergic	GABAergic	COL6A3	ITGA9_ITGB1	0.132984	3	COL6A3_ITGA9_ITGB1	COL6A3 - (ITGA9+ITGB1)	COLLAGEN	ECM-Receptor	KEGG: hsa04512	Glutamatergic -> GABAergic (Hippo)	0.000542304	Glutamatergic -> GABAergic	Hippocampus
2177	Fibroblast	Glutamatergic	COL6A3	ITGA9_ITGB1	0.189593	3	COL6A3_ITGA9_ITGB1	COL6A3 - (ITGA9+ITGB1)	COLLAGEN	ECM-Receptor	KEGG: hsa04512	Fibroblast -> Glutamatergic (Hippo)	0.00512068	Fibroblast -> Glutamatergic	Hippocampus
2178	Glutamatergic	Glutamatergic	COL6A3	ITGA9_ITGB1	0.15407	3	COL6A3_ITGA9_ITGB1	COL6A3 - (ITGA9+ITGB1)	COLLAGEN	ECM-Receptor	KEGG: hsa04512	Glutamatergic -> Glutamatergic (Hippo)	0.0015177	Glutamatergic -> Glutamatergic	Hippocampus
670	Fibroblast	Oligodendrocyte precursor	COL6A3	ITGAV_ITGB8	0.196206	3	COL6A3_ITGAV_ITGB8	COL6A3 - (ITGAV+ITGB8)	COLLAGEN	ECM-Receptor	KEGG: hsa04512	Fibroblast -> Oligodendrocyte precursor (CC)	0.00611697	Fibroblast -> Oligodendrocyte precursor	Prefrontal cortex
671	Fibroblast	Newly formed oligodendrocyte	COL6A3	ITGAV_ITGB8	0.170433	3	COL6A3_ITGAV_ITGB8	COL6A3 - (ITGAV+ITGB8)	COLLAGEN	ECM-Receptor	KEGG: hsa04512	Fibroblast -> Newly formed oligodendrocyte (CC)	0.00283021	Fibroblast -> Newly formed oligodendrocyte	Prefrontal cortex
672	Fibroblast	Astrocyte	COL6A3	ITGAV_ITGB8	0.18396	3	COL6A3_ITGAV_ITGB8	COL6A3 - (ITGAV+ITGB8)	COLLAGEN	ECM-Receptor	KEGG: hsa04512	Fibroblast -> Astrocyte (CC)	0.00435701	Fibroblast -> Astrocyte	Prefrontal cortex
2441	Fibroblast	Microglia (PCDH9high)	COL6A3	ITGAV_ITGB8	0.192695	3	COL6A3_ITGAV_ITGB8	COL6A3 - (ITGAV+ITGB8)	COLLAGEN	ECM-Receptor	KEGG: hsa04512	Fibroblast -> Microglia (PCDH9high) (Hippo)	0.00557447	Fibroblast -> Microglia (PCDH9high)	Hippocampus
2442	Glutamatergic	Microglia (PCDH9high)	COL6A3	ITGAV_ITGB8	0.15612	3	COL6A3_ITGAV_ITGB8	COL6A3 - (ITGAV+ITGB8)	COLLAGEN	ECM-Receptor	KEGG: hsa04512	Glutamatergic -> Microglia (PCDH9high) (Hippo)	0.00165273	Glutamatergic -> Microglia (PCDH9high)	Hippocampus
2443	Fibroblast	Oligodendrocyte precursor	COL6A3	ITGAV_ITGB8	0.209094	3	COL6A3_ITGAV_ITGB8	COL6A3 - (ITGAV+ITGB8)	COLLAGEN	ECM-Receptor	KEGG: hsa04512	Fibroblast -> Oligodendrocyte precursor (Hippo)	0.00837478	Fibroblast -> Oligodendrocyte precursor	Hippocampus
2444	Glutamatergic	Oligodendrocyte precursor	COL6A3	ITGAV_ITGB8	0.166769	3	COL6A3_ITGAV_ITGB8	COL6A3 - (ITGAV+ITGB8)	COLLAGEN	ECM-Receptor	KEGG: hsa04512	Glutamatergic -> Oligodendrocyte precursor (Hippo)	0.0024879	Glutamatergic -> Oligodendrocyte precursor	Hippocampus
2445	Fibroblast	Newly formed oligodendrocyte	COL6A3	ITGAV_ITGB8	0.1795	3	COL6A3_ITGAV_ITGB8	COL6A3 - (ITGAV+ITGB8)	COLLAGEN	ECM-Receptor	KEGG: hsa04512	Fibroblast -> Newly formed oligodendrocyte (Hippo)	0.00380652	Fibroblast -> Newly formed oligodendrocyte	Hippocampus
2446	Glutamatergic	Newly formed oligodendrocyte	COL6A3	ITGAV_ITGB8	0.147318	3	COL6A3_ITGAV_ITGB8	COL6A3 - (ITGAV+ITGB8)	COLLAGEN	ECM-Receptor	KEGG: hsa04512	Glutamatergic -> Newly formed oligodendrocyte (Hippo)	0.00112716	Glutamatergic -> Newly formed oligodendrocyte	Hippocampus
2447	Fibroblast	Astrocyte	COL6A3	ITGAV_ITGB8	0.193341	3	COL6A3_ITGAV_ITGB8	COL6A3 - (ITGAV+ITGB8)	COLLAGEN	ECM-Receptor	KEGG: hsa04512	Fibroblast -> Astrocyte (Hippo)	0.00567207	Fibroblast -> Astrocyte	Hippocampus
2448	Glutamatergic	Astrocyte	COL6A3	ITGAV_ITGB8	0.156546	3	COL6A3_ITGAV_ITGB8	COL6A3 - (ITGAV+ITGB8)	COLLAGEN	ECM-Receptor	KEGG: hsa04512	Glutamatergic -> Astrocyte (Hippo)	0.00168178	Glutamatergic -> Astrocyte	Hippocampus
2449	Fibroblast	Glutamatergic	COL6A3	ITGAV_ITGB8	0.173633	3	COL6A3_ITGAV_ITGB8	COL6A3 - (ITGAV+ITGB8)	COLLAGEN	ECM-Receptor	KEGG: hsa04512	Fibroblast -> Glutamatergic (Hippo)	0.00315342	Fibroblast -> Glutamatergic	Hippocampus
2450	Glutamatergic	Glutamatergic	COL6A3	ITGAV_ITGB8	0.143333	3	COL6A3_ITGAV_ITGB8	COL6A3 - (ITGAV+ITGB8)	COLLAGEN	ECM-Receptor	KEGG: hsa04512	Glutamatergic -> Glutamatergic (Hippo)	0.000933334	Glutamatergic -> Glutamatergic	Hippocampus
2508	Fibroblast	Astrocyte	COL6A3	CD44	0.182813	3	COL6A3_CD44	COL6A3 - CD44	COLLAGEN	ECM-Receptor	KEGG: hsa04512	Fibroblast -> Astrocyte (Hippo)	0.00421094	Fibroblast -> Astrocyte	Hippocampus
2509	Glutamatergic	Astrocyte	COL6A3	CD44	0.149548	3	COL6A3_CD44	COL6A3 - CD44	COLLAGEN	ECM-Receptor	KEGG: hsa04512	Glutamatergic -> Astrocyte (Hippo)	0.00124726	Glutamatergic -> Astrocyte	Hippocampus
720	Fibroblast	Astrocyte	COL6A3	SDC4	0.189072	3	COL6A3_SDC4	COL6A3 - SDC4	COLLAGEN	ECM-Receptor	KEGG: hsa04512	Fibroblast -> Astrocyte (CC)	0.00504682	Fibroblast -> Astrocyte	Prefrontal cortex
2553	Fibroblast	Astrocyte	COL6A3	SDC4	0.190191	3	COL6A3_SDC4	COL6A3 - SDC4	COLLAGEN	ECM-Receptor	KEGG: hsa04512	Fibroblast -> Astrocyte (Hippo)	0.0052064	Fibroblast -> Astrocyte	Hippocampus
2554	Glutamatergic	Astrocyte	COL6A3	SDC4	0.154466	3	COL6A3_SDC4	COL6A3 - SDC4	COLLAGEN	ECM-Receptor	KEGG: hsa04512	Glutamatergic -> Astrocyte (Hippo)	0.0015432	Glutamatergic -> Astrocyte	Hippocampus
448	Oligodendrocyte precursor	Vascular leptomeningeal cell	COL9A1	ITGA1_ITGB1	0.238158	3	COL9A1_ITGA1_ITGB1	COL9A1 - (ITGA1+ITGB1)	COLLAGEN	ECM-Receptor	KEGG: hsa04512	Oligodendrocyte precursor -> Vascular leptomeningeal cell (CC)	0.0150122	Oligodendrocyte precursor -> Vascular leptomeningeal cell	Prefrontal cortex
449	Newly formed oligodendrocyte	Vascular leptomeningeal cell	COL9A1	ITGA1_ITGB1	0.256519	3	COL9A1_ITGA1_ITGB1	COL9A1 - (ITGA1+ITGB1)	COLLAGEN	ECM-Receptor	KEGG: hsa04512	Newly formed oligodendrocyte -> Vascular leptomeningeal cell (CC)	0.0202753	Newly formed oligodendrocyte -> Vascular leptomeningeal cell	Prefrontal cortex
450	Oligodendrocyte precursor	Endothelial	COL9A1	ITGA1_ITGB1	0.305388	3	COL9A1_ITGA1_ITGB1	COL9A1 - (ITGA1+ITGB1)	COLLAGEN	ECM-Receptor	KEGG: hsa04512	Oligodendrocyte precursor -> Endothelial (CC)	0.0378348	Oligodendrocyte precursor -> Endothelial	Prefrontal cortex
451	Newly formed oligodendrocyte	Endothelial	COL9A1	ITGA1_ITGB1	0.335337	3	COL9A1_ITGA1_ITGB1	COL9A1 - (ITGA1+ITGB1)	COLLAGEN	ECM-Receptor	KEGG: hsa04512	Newly formed oligodendrocyte -> Endothelial (CC)	0.0506875	Newly formed oligodendrocyte -> Endothelial	Prefrontal cortex
2001	Oligodendrocyte precursor	Vascular leptomeningeal cell	COL9A1	ITGA1_ITGB1	0.241229	3	COL9A1_ITGA1_ITGB1	COL9A1 - (ITGA1+ITGB1)	COLLAGEN	ECM-Receptor	KEGG: hsa04512	Oligodendrocyte precursor -> Vascular leptomeningeal cell (Hippo)	0.0158365	Oligodendrocyte precursor -> Vascular leptomeningeal cell	Hippocampus
2002	Newly formed oligodendrocyte	Vascular leptomeningeal cell	COL9A1	ITGA1_ITGB1	0.225989	3	COL9A1_ITGA1_ITGB1	COL9A1 - (ITGA1+ITGB1)	COLLAGEN	ECM-Receptor	KEGG: hsa04512	Newly formed oligodendrocyte -> Vascular leptomeningeal cell (Hippo)	0.0119742	Newly formed oligodendrocyte -> Vascular leptomeningeal cell	Hippocampus
2003	Oligodendrocyte precursor	Endothelial	COL9A1	ITGA1_ITGB1	0.304646	3	COL9A1_ITGA1_ITGB1	COL9A1 - (ITGA1+ITGB1)	COLLAGEN	ECM-Receptor	KEGG: hsa04512	Oligodendrocyte precursor -> Endothelial (Hippo)	0.0375345	Oligodendrocyte precursor -> Endothelial	Hippocampus
2004	Newly formed oligodendrocyte	Endothelial	COL9A1	ITGA1_ITGB1	0.281162	3	COL9A1_ITGA1_ITGB1	COL9A1 - (ITGA1+ITGB1)	COLLAGEN	ECM-Receptor	KEGG: hsa04512	Newly formed oligodendrocyte -> Endothelial (Hippo)	0.0285338	Newly formed oligodendrocyte -> Endothelial	Hippocampus
546	Oligodendrocyte precursor	Vascular leptomeningeal cell	COL9A1	ITGA10_ITGB1	0.221779	3	COL9A1_ITGA10_ITGB1	COL9A1 - (ITGA10+ITGB1)	COLLAGEN	ECM-Receptor	KEGG: hsa04512	Oligodendrocyte precursor -> Vascular leptomeningeal cell (CC)	0.0110096	Oligodendrocyte precursor -> Vascular leptomeningeal cell	Prefrontal cortex
547	Newly formed oligodendrocyte	Vascular leptomeningeal cell	COL9A1	ITGA10_ITGB1	0.237698	3	COL9A1_ITGA10_ITGB1	COL9A1 - (ITGA10+ITGB1)	COLLAGEN	ECM-Receptor	KEGG: hsa04512	Newly formed oligodendrocyte -> Vascular leptomeningeal cell (CC)	0.0148906	Newly formed oligodendrocyte -> Vascular leptomeningeal cell	Prefrontal cortex
2179	Oligodendrocyte precursor	GABAergic	COL9A1	ITGA9_ITGB1	0.180408	3	COL9A1_ITGA9_ITGB1	COL9A1 - (ITGA9+ITGB1)	COLLAGEN	ECM-Receptor	KEGG: hsa04512	Oligodendrocyte precursor -> GABAergic (Hippo)	0.00391485	Oligodendrocyte precursor -> GABAergic	Hippocampus
2180	Newly formed oligodendrocyte	GABAergic	COL9A1	ITGA9_ITGB1	0.171659	3	COL9A1_ITGA9_ITGB1	COL9A1 - (ITGA9+ITGB1)	COLLAGEN	ECM-Receptor	KEGG: hsa04512	Newly formed oligodendrocyte -> GABAergic (Hippo)	0.00295135	Newly formed oligodendrocyte -> GABAergic	Hippocampus
2181	Oligodendrocyte precursor	Glutamatergic	COL9A1	ITGA9_ITGB1	0.221244	3	COL9A1_ITGA9_ITGB1	COL9A1 - (ITGA9+ITGB1)	COLLAGEN	ECM-Receptor	KEGG: hsa04512	Oligodendrocyte precursor -> Glutamatergic (Hippo)	0.0108901	Oligodendrocyte precursor -> Glutamatergic	Hippocampus
2182	Newly formed oligodendrocyte	Glutamatergic	COL9A1	ITGA9_ITGB1	0.208303	3	COL9A1_ITGA9_ITGB1	COL9A1 - (ITGA9+ITGB1)	COLLAGEN	ECM-Receptor	KEGG: hsa04512	Newly formed oligodendrocyte -> Glutamatergic (Hippo)	0.00822406	Newly formed oligodendrocyte -> Glutamatergic	Hippocampus
673	Oligodendrocyte precursor	Oligodendrocyte precursor	COL9A1	ITGAV_ITGB8	0.252122	3	COL9A1_ITGAV_ITGB8	COL9A1 - (ITGAV+ITGB8)	COLLAGEN	ECM-Receptor	KEGG: hsa04512	Oligodendrocyte precursor -> Oligodendrocyte precursor (CC)	0.0189428	Oligodendrocyte precursor -> Oligodendrocyte precursor	Prefrontal cortex
674	Newly formed oligodendrocyte	Oligodendrocyte precursor	COL9A1	ITGAV_ITGB8	0.272688	3	COL9A1_ITGAV_ITGB8	COL9A1 - (ITGAV+ITGB8)	COLLAGEN	ECM-Receptor	KEGG: hsa04512	Newly formed oligodendrocyte -> Oligodendrocyte precursor (CC)	0.0255481	Newly formed oligodendrocyte -> Oligodendrocyte precursor	Prefrontal cortex
675	Oligodendrocyte precursor	Newly formed oligodendrocyte	COL9A1	ITGAV_ITGB8	0.211412	3	COL9A1_ITGAV_ITGB8	COL9A1 - (ITGAV+ITGB8)	COLLAGEN	ECM-Receptor	KEGG: hsa04512	Oligodendrocyte precursor -> Newly formed oligodendrocyte (CC)	0.00882567	Oligodendrocyte precursor -> Newly formed oligodendrocyte	Prefrontal cortex
676	Newly formed oligodendrocyte	Newly formed oligodendrocyte	COL9A1	ITGAV_ITGB8	0.225869	3	COL9A1_ITGAV_ITGB8	COL9A1 - (ITGAV+ITGB8)	COLLAGEN	ECM-Receptor	KEGG: hsa04512	Newly formed oligodendrocyte -> Newly formed oligodendrocyte (CC)	0.0119461	Newly formed oligodendrocyte -> Newly formed oligodendrocyte	Prefrontal cortex
677	Oligodendrocyte precursor	Astrocyte	COL9A1	ITGAV_ITGB8	0.232456	3	COL9A1_ITGAV_ITGB8	COL9A1 - (ITGAV+ITGB8)	COLLAGEN	ECM-Receptor	KEGG: hsa04512	Oligodendrocyte precursor -> Astrocyte (CC)	0.0135429	Oligodendrocyte precursor -> Astrocyte	Prefrontal cortex
678	Newly formed oligodendrocyte	Astrocyte	COL9A1	ITGAV_ITGB8	0.249948	3	COL9A1_ITGAV_ITGB8	COL9A1 - (ITGAV+ITGB8)	COLLAGEN	ECM-Receptor	KEGG: hsa04512	Newly formed oligodendrocyte -> Astrocyte (CC)	0.0183004	Newly formed oligodendrocyte -> Astrocyte	Prefrontal cortex
2451	Oligodendrocyte precursor	Microglia (PCDH9high)	COL9A1	ITGAV_ITGB8	0.225453	3	COL9A1_ITGAV_ITGB8	COL9A1 - (ITGAV+ITGB8)	COLLAGEN	ECM-Receptor	KEGG: hsa04512	Oligodendrocyte precursor -> Microglia (PCDH9high) (Hippo)	0.0118491	Oligodendrocyte precursor -> Microglia (PCDH9high)	Hippocampus
2452	Newly formed oligodendrocyte	Microglia (PCDH9high)	COL9A1	ITGAV_ITGB8	0.212042	3	COL9A1_ITGAV_ITGB8	COL9A1 - (ITGAV+ITGB8)	COLLAGEN	ECM-Receptor	KEGG: hsa04512	Newly formed oligodendrocyte -> Microglia (PCDH9high) (Hippo)	0.0089504	Newly formed oligodendrocyte -> Microglia (PCDH9high)	Hippocampus
2453	Oligodendrocyte precursor	Oligodendrocyte precursor	COL9A1	ITGAV_ITGB8	0.248038	3	COL9A1_ITGAV_ITGB8	COL9A1 - (ITGAV+ITGB8)	COLLAGEN	ECM-Receptor	KEGG: hsa04512	Oligodendrocyte precursor -> Oligodendrocyte precursor (Hippo)	0.0177451	Oligodendrocyte precursor -> Oligodendrocyte precursor	Hippocampus
2454	Newly formed oligodendrocyte	Oligodendrocyte precursor	COL9A1	ITGAV_ITGB8	0.231979	3	COL9A1_ITGAV_ITGB8	COL9A1 - (ITGAV+ITGB8)	COLLAGEN	ECM-Receptor	KEGG: hsa04512	Newly formed oligodendrocyte -> Oligodendrocyte precursor (Hippo)	0.0134237	Newly formed oligodendrocyte -> Oligodendrocyte precursor	Hippocampus
2455	Oligodendrocyte precursor	Newly formed oligodendrocyte	COL9A1	ITGAV_ITGB8	0.207685	3	COL9A1_ITGAV_ITGB8	COL9A1 - (ITGAV+ITGB8)	COLLAGEN	ECM-Receptor	KEGG: hsa04512	Oligodendrocyte precursor -> Newly formed oligodendrocyte (Hippo)	0.00810734	Oligodendrocyte precursor -> Newly formed oligodendrocyte	Hippocampus
2456	Newly formed oligodendrocyte	Newly formed oligodendrocyte	COL9A1	ITGAV_ITGB8	0.196215	3	COL9A1_ITGAV_ITGB8	COL9A1 - (ITGAV+ITGB8)	COLLAGEN	ECM-Receptor	KEGG: hsa04512	Newly formed oligodendrocyte -> Newly formed oligodendrocyte (Hippo)	0.00611836	Newly formed oligodendrocyte -> Newly formed oligodendrocyte	Hippocampus
2457	Oligodendrocyte precursor	Astrocyte	COL9A1	ITGAV_ITGB8	0.226333	3	COL9A1_ITGAV_ITGB8	COL9A1 - (ITGAV+ITGB8)	COLLAGEN	ECM-Receptor	KEGG: hsa04512	Oligodendrocyte precursor -> Astrocyte (Hippo)	0.0120552	Oligodendrocyte precursor -> Astrocyte	Hippocampus
2458	Newly formed oligodendrocyte	Astrocyte	COL9A1	ITGAV_ITGB8	0.212822	3	COL9A1_ITGAV_ITGB8	COL9A1 - (ITGAV+ITGB8)	COLLAGEN	ECM-Receptor	KEGG: hsa04512	Newly formed oligodendrocyte -> Astrocyte (Hippo)	0.00910656	Newly formed oligodendrocyte -> Astrocyte	Hippocampus
2459	Oligodendrocyte precursor	Glutamatergic	COL9A1	ITGAV_ITGB8	0.199901	3	COL9A1_ITGAV_ITGB8	COL9A1 - (ITGAV+ITGB8)	COLLAGEN	ECM-Receptor	KEGG: hsa04512	Oligodendrocyte precursor -> Glutamatergic (Hippo)	0.00672131	Oligodendrocyte precursor -> Glutamatergic	Hippocampus
2460	Newly formed oligodendrocyte	Glutamatergic	COL9A1	ITGAV_ITGB8	0.18924	3	COL9A1_ITGAV_ITGB8	COL9A1 - (ITGAV+ITGB8)	COLLAGEN	ECM-Receptor	KEGG: hsa04512	Newly formed oligodendrocyte -> Glutamatergic (Hippo)	0.00507062	Newly formed oligodendrocyte -> Glutamatergic	Hippocampus
2510	Oligodendrocyte precursor	Astrocyte	COL9A1	CD44	0.212113	3	COL9A1_CD44	COL9A1 - CD44	COLLAGEN	ECM-Receptor	KEGG: hsa04512	Oligodendrocyte precursor -> Astrocyte (Hippo)	0.00896457	Oligodendrocyte precursor -> Astrocyte	Hippocampus
2511	Newly formed oligodendrocyte	Astrocyte	COL9A1	CD44	0.200171	3	COL9A1_CD44	COL9A1 - CD44	COLLAGEN	ECM-Receptor	KEGG: hsa04512	Newly formed oligodendrocyte -> Astrocyte (Hippo)	0.00676672	Newly formed oligodendrocyte -> Astrocyte	Hippocampus
721	Oligodendrocyte precursor	Astrocyte	COL9A1	SDC4	0.240594	3	COL9A1_SDC4	COL9A1 - SDC4	COLLAGEN	ECM-Receptor	KEGG: hsa04512	Oligodendrocyte precursor -> Astrocyte (CC)	0.0156641	Oligodendrocyte precursor -> Astrocyte	Prefrontal cortex
722	Newly formed oligodendrocyte	Astrocyte	COL9A1	SDC4	0.259331	3	COL9A1_SDC4	COL9A1 - SDC4	COLLAGEN	ECM-Receptor	KEGG: hsa04512	Newly formed oligodendrocyte -> Astrocyte (CC)	0.0211509	Newly formed oligodendrocyte -> Astrocyte	Prefrontal cortex
2555	Oligodendrocyte precursor	Astrocyte	COL9A1	SDC4	0.222054	3	COL9A1_SDC4	COL9A1 - SDC4	COLLAGEN	ECM-Receptor	KEGG: hsa04512	Oligodendrocyte precursor -> Astrocyte (Hippo)	0.0110713	Oligodendrocyte precursor -> Astrocyte	Hippocampus
2556	Newly formed oligodendrocyte	Astrocyte	COL9A1	SDC4	0.209024	3	COL9A1_SDC4	COL9A1 - SDC4	COLLAGEN	ECM-Receptor	KEGG: hsa04512	Newly formed oligodendrocyte -> Astrocyte (Hippo)	0.00836129	Newly formed oligodendrocyte -> Astrocyte	Hippocampus
452	Newly formed oligodendrocyte	Vascular leptomeningeal cell	COL9A2	ITGA1_ITGB1	0.219129	3	COL9A2_ITGA1_ITGB1	COL9A2 - (ITGA1+ITGB1)	COLLAGEN	ECM-Receptor	KEGG: hsa04512	Newly formed oligodendrocyte -> Vascular leptomeningeal cell (CC)	0.0104252	Newly formed oligodendrocyte -> Vascular leptomeningeal cell	Prefrontal cortex
453	Newly formed oligodendrocyte	Endothelial	COL9A2	ITGA1_ITGB1	0.275326	3	COL9A2_ITGA1_ITGB1	COL9A2 - (ITGA1+ITGB1)	COLLAGEN	ECM-Receptor	KEGG: hsa04512	Newly formed oligodendrocyte -> Endothelial (CC)	0.0264617	Newly formed oligodendrocyte -> Endothelial	Prefrontal cortex
2005	Newly formed oligodendrocyte	Vascular leptomeningeal cell	COL9A2	ITGA1_ITGB1	0.182951	3	COL9A2_ITGA1_ITGB1	COL9A2 - (ITGA1+ITGB1)	COLLAGEN	ECM-Receptor	KEGG: hsa04512	Newly formed oligodendrocyte -> Vascular leptomeningeal cell (Hippo)	0.00422834	Newly formed oligodendrocyte -> Vascular leptomeningeal cell	Hippocampus
2006	Newly formed oligodendrocyte	Endothelial	COL9A2	ITGA1_ITGB1	0.218021	3	COL9A2_ITGA1_ITGB1	COL9A2 - (ITGA1+ITGB1)	COLLAGEN	ECM-Receptor	KEGG: hsa04512	Newly formed oligodendrocyte -> Endothelial (Hippo)	0.0101863	Newly formed oligodendrocyte -> Endothelial	Hippocampus
548	Newly formed oligodendrocyte	Vascular leptomeningeal cell	COL9A2	ITGA10_ITGB1	0.205134	3	COL9A2_ITGA10_ITGB1	COL9A2 - (ITGA10+ITGB1)	COLLAGEN	ECM-Receptor	KEGG: hsa04512	Newly formed oligodendrocyte -> Vascular leptomeningeal cell (CC)	0.0076361	Newly formed oligodendrocyte -> Vascular leptomeningeal cell	Prefrontal cortex
2183	Newly formed oligodendrocyte	GABAergic	COL9A2	ITGA9_ITGB1	0.145511	3	COL9A2_ITGA9_ITGB1	COL9A2 - (ITGA9+ITGB1)	COLLAGEN	ECM-Receptor	KEGG: hsa04512	Newly formed oligodendrocyte -> GABAergic (Hippo)	0.00103606	Newly formed oligodendrocyte -> GABAergic	Hippocampus
2184	Newly formed oligodendrocyte	Glutamatergic	COL9A2	ITGA9_ITGB1	0.171113	3	COL9A2_ITGA9_ITGB1	COL9A2 - (ITGA9+ITGB1)	COLLAGEN	ECM-Receptor	KEGG: hsa04512	Newly formed oligodendrocyte -> Glutamatergic (Hippo)	0.00289697	Newly formed oligodendrocyte -> Glutamatergic	Hippocampus
679	Newly formed oligodendrocyte	Oligodendrocyte precursor	COL9A2	ITGAV_ITGB8	0.23096	3	COL9A2_ITGAV_ITGB8	COL9A2 - (ITGAV+ITGB8)	COLLAGEN	ECM-Receptor	KEGG: hsa04512	Newly formed oligodendrocyte -> Oligodendrocyte precursor (CC)	0.0131708	Newly formed oligodendrocyte -> Oligodendrocyte precursor	Prefrontal cortex
680	Newly formed oligodendrocyte	Newly formed oligodendrocyte	COL9A2	ITGAV_ITGB8	0.196207	3	COL9A2_ITGAV_ITGB8	COL9A2 - (ITGAV+ITGB8)	COLLAGEN	ECM-Receptor	KEGG: hsa04512	Newly formed oligodendrocyte -> Newly formed oligodendrocyte (CC)	0.00611722	Newly formed oligodendrocyte -> Newly formed oligodendrocyte	Prefrontal cortex
681	Newly formed oligodendrocyte	Astrocyte	COL9A2	ITGAV_ITGB8	0.214271	3	COL9A2_ITGAV_ITGB8	COL9A2 - (ITGAV+ITGB8)	COLLAGEN	ECM-Receptor	KEGG: hsa04512	Newly formed oligodendrocyte -> Astrocyte (CC)	0.00940053	Newly formed oligodendrocyte -> Astrocyte	Prefrontal cortex
2461	Newly formed oligodendrocyte	Microglia (PCDH9high)	COL9A2	ITGAV_ITGB8	0.173642	3	COL9A2_ITGAV_ITGB8	COL9A2 - (ITGAV+ITGB8)	COLLAGEN	ECM-Receptor	KEGG: hsa04512	Newly formed oligodendrocyte -> Microglia (PCDH9high) (Hippo)	0.00315433	Newly formed oligodendrocyte -> Microglia (PCDH9high)	Hippocampus
2462	Newly formed oligodendrocyte	Oligodendrocyte precursor	COL9A2	ITGAV_ITGB8	0.18689	3	COL9A2_ITGAV_ITGB8	COL9A2 - (ITGAV+ITGB8)	COLLAGEN	ECM-Receptor	KEGG: hsa04512	Newly formed oligodendrocyte -> Oligodendrocyte precursor (Hippo)	0.00474469	Newly formed oligodendrocyte -> Oligodendrocyte precursor	Hippocampus
2463	Newly formed oligodendrocyte	Newly formed oligodendrocyte	COL9A2	ITGAV_ITGB8	0.162834	3	COL9A2_ITGAV_ITGB8	COL9A2 - (ITGAV+ITGB8)	COLLAGEN	ECM-Receptor	KEGG: hsa04512	Newly formed oligodendrocyte -> Newly formed oligodendrocyte (Hippo)	0.00215227	Newly formed oligodendrocyte -> Newly formed oligodendrocyte	Hippocampus
2464	Newly formed oligodendrocyte	Astrocyte	COL9A2	ITGAV_ITGB8	0.174168	3	COL9A2_ITGAV_ITGB8	COL9A2 - (ITGAV+ITGB8)	COLLAGEN	ECM-Receptor	KEGG: hsa04512	Newly formed oligodendrocyte -> Astrocyte (Hippo)	0.00320969	Newly formed oligodendrocyte -> Astrocyte	Hippocampus
2465	Newly formed oligodendrocyte	Glutamatergic	COL9A2	ITGAV_ITGB8	0.157984	3	COL9A2_ITGAV_ITGB8	COL9A2 - (ITGAV+ITGB8)	COLLAGEN	ECM-Receptor	KEGG: hsa04512	Newly formed oligodendrocyte -> Glutamatergic (Hippo)	0.00178249	Newly formed oligodendrocyte -> Glutamatergic	Hippocampus
2512	Newly formed oligodendrocyte	Astrocyte	COL9A2	CD44	0.165561	3	COL9A2_CD44	COL9A2 - CD44	COLLAGEN	ECM-Receptor	KEGG: hsa04512	Newly formed oligodendrocyte -> Astrocyte (Hippo)	0.00238135	Newly formed oligodendrocyte -> Astrocyte	Hippocampus
723	Newly formed oligodendrocyte	Astrocyte	COL9A2	SDC4	0.221199	3	COL9A2_SDC4	COL9A2 - SDC4	COLLAGEN	ECM-Receptor	KEGG: hsa04512	Newly formed oligodendrocyte -> Astrocyte (CC)	0.0108801	Newly formed oligodendrocyte -> Astrocyte	Prefrontal cortex
2557	Newly formed oligodendrocyte	Astrocyte	COL9A2	SDC4	0.171602	3	COL9A2_SDC4	COL9A2 - SDC4	COLLAGEN	ECM-Receptor	KEGG: hsa04512	Newly formed oligodendrocyte -> Astrocyte (Hippo)	0.00294558	Newly formed oligodendrocyte -> Astrocyte	Hippocampus
454	Newly formed oligodendrocyte	Vascular leptomeningeal cell	COL9A3	ITGA1_ITGB1	0.176717	3	COL9A3_ITGA1_ITGB1	COL9A3 - (ITGA1+ITGB1)	COLLAGEN	ECM-Receptor	KEGG: hsa04512	Newly formed oligodendrocyte -> Vascular leptomeningeal cell (CC)	0.00348678	Newly formed oligodendrocyte -> Vascular leptomeningeal cell	Prefrontal cortex
455	Newly formed oligodendrocyte	Endothelial	COL9A3	ITGA1_ITGB1	0.212023	3	COL9A3_ITGA1_ITGB1	COL9A3 - (ITGA1+ITGB1)	COLLAGEN	ECM-Receptor	KEGG: hsa04512	Newly formed oligodendrocyte -> Endothelial (CC)	0.00894678	Newly formed oligodendrocyte -> Endothelial	Prefrontal cortex
549	Newly formed oligodendrocyte	Vascular leptomeningeal cell	COL9A3	ITGA10_ITGB1	0.167448	3	COL9A3_ITGA10_ITGB1	COL9A3 - (ITGA10+ITGB1)	COLLAGEN	ECM-Receptor	KEGG: hsa04512	Newly formed oligodendrocyte -> Vascular leptomeningeal cell (CC)	0.00254917	Newly formed oligodendrocyte -> Vascular leptomeningeal cell	Prefrontal cortex
682	Newly formed oligodendrocyte	Oligodendrocyte precursor	COL9A3	ITGAV_ITGB8	0.184395	3	COL9A3_ITGAV_ITGB8	COL9A3 - (ITGAV+ITGB8)	COLLAGEN	ECM-Receptor	KEGG: hsa04512	Newly formed oligodendrocyte -> Oligodendrocyte precursor (CC)	0.00441322	Newly formed oligodendrocyte -> Oligodendrocyte precursor	Prefrontal cortex
683	Newly formed oligodendrocyte	Newly formed oligodendrocyte	COL9A3	ITGAV_ITGB8	0.161426	3	COL9A3_ITGAV_ITGB8	COL9A3 - (ITGAV+ITGB8)	COLLAGEN	ECM-Receptor	KEGG: hsa04512	Newly formed oligodendrocyte -> Newly formed oligodendrocyte (CC)	0.00204004	Newly formed oligodendrocyte -> Newly formed oligodendrocyte	Prefrontal cortex
684	Newly formed oligodendrocyte	Astrocyte	COL9A3	ITGAV_ITGB8	0.173523	3	COL9A3_ITGAV_ITGB8	COL9A3 - (ITGAV+ITGB8)	COLLAGEN	ECM-Receptor	KEGG: hsa04512	Newly formed oligodendrocyte -> Astrocyte (CC)	0.00314191	Newly formed oligodendrocyte -> Astrocyte	Prefrontal cortex
724	Newly formed oligodendrocyte	Astrocyte	COL9A3	SDC4	0.17807	3	COL9A3_SDC4	COL9A3 - SDC4	COLLAGEN	ECM-Receptor	KEGG: hsa04512	Newly formed oligodendrocyte -> Astrocyte (CC)	0.00364005	Newly formed oligodendrocyte -> Astrocyte	Prefrontal cortex
159	Glutamatergic	Microglia (PCDH9high)	CX3CL1	CX3CR1	0.150425	3	CX3CL1_CX3CR1	CX3CL1 - CX3CR1	CX3C	Secreted Signaling	KEGG: hsa04060	Glutamatergic -> Microglia (PCDH9high) (CC)	0.00129685	Glutamatergic -> Microglia (PCDH9high)	Prefrontal cortex
160	Glutamatergic	Microglia	CX3CL1	CX3CR1	0.153523	3	CX3CL1_CX3CR1	CX3CL1 - CX3CR1	CX3C	Secreted Signaling	KEGG: hsa04060	Glutamatergic -> Microglia (CC)	0.00148303	Glutamatergic -> Microglia	Prefrontal cortex
286	Endothelial	Vascular leptomeningeal cell	EDN1	EDNRA	0.168273	3	EDN1_EDNRA	EDN1 - EDNRA	EDN	Secreted Signaling	KEGG: hsa04080	Endothelial -> Vascular leptomeningeal cell (CC)	0.00262488	Endothelial -> Vascular leptomeningeal cell	Prefrontal cortex
1886	Endothelial	Vascular leptomeningeal cell	EDN1	EDNRA	0.196465	3	EDN1_EDNRA	EDN1 - EDNRA	EDN	Secreted Signaling	KEGG: hsa04080	Endothelial -> Vascular leptomeningeal cell (Hippo)	0.00615831	Endothelial -> Vascular leptomeningeal cell	Hippocampus
287	Endothelial	Astrocyte	EDN1	EDNRB	0.154801	3	EDN1_EDNRB	EDN1 - EDNRB	EDN	Secreted Signaling	KEGG: hsa04080	Endothelial -> Astrocyte (CC)	0.00156493	Endothelial -> Astrocyte	Prefrontal cortex
1066	Astrocyte	Fibroblast	EFNA5	EPHA3	0.225833	3	EFNA5_EPHA3	EFNA5 - EPHA3	EPHA	Cell-Cell Contact	PMID: 15114347	Astrocyte -> Fibroblast (CC)	0.0119378	Astrocyte -> Fibroblast	Prefrontal cortex
1067	Fibroblast	Fibroblast	EFNA5	EPHA3	0.173353	3	EFNA5_EPHA3	EFNA5 - EPHA3	EPHA	Cell-Cell Contact	PMID: 15114347	Fibroblast -> Fibroblast (CC)	0.00312418	Fibroblast -> Fibroblast	Prefrontal cortex
1068	GABAergic	Fibroblast	EFNA5	EPHA3	0.212319	3	EFNA5_EPHA3	EFNA5 - EPHA3	EPHA	Cell-Cell Contact	PMID: 15114347	GABAergic -> Fibroblast (CC)	0.00900563	GABAergic -> Fibroblast	Prefrontal cortex
1069	Glutamatergic	Fibroblast	EFNA5	EPHA3	0.259248	3	EFNA5_EPHA3	EFNA5 - EPHA3	EPHA	Cell-Cell Contact	PMID: 15114347	Glutamatergic -> Fibroblast (CC)	0.0211247	Glutamatergic -> Fibroblast	Prefrontal cortex
1070	Astrocyte	Endothelial	EFNA5	EPHA3	0.173851	3	EFNA5_EPHA3	EFNA5 - EPHA3	EPHA	Cell-Cell Contact	PMID: 15114347	Astrocyte -> Endothelial (CC)	0.00317629	Astrocyte -> Endothelial	Prefrontal cortex
1071	Fibroblast	Endothelial	EFNA5	EPHA3	0.140863	3	EFNA5_EPHA3	EFNA5 - EPHA3	EPHA	Cell-Cell Contact	PMID: 15114347	Fibroblast -> Endothelial (CC)	0.000825845	Fibroblast -> Endothelial	Prefrontal cortex
1072	GABAergic	Endothelial	EFNA5	EPHA3	0.165671	3	EFNA5_EPHA3	EFNA5 - EPHA3	EPHA	Cell-Cell Contact	PMID: 15114347	GABAergic -> Endothelial (CC)	0.00239093	GABAergic -> Endothelial	Prefrontal cortex
1073	Glutamatergic	Endothelial	EFNA5	EPHA3	0.193257	3	EFNA5_EPHA3	EFNA5 - EPHA3	EPHA	Cell-Cell Contact	PMID: 15114347	Glutamatergic -> Endothelial (CC)	0.00565929	Glutamatergic -> Endothelial	Prefrontal cortex
1074	Astrocyte	Glutamatergic	EFNA5	EPHA3	0.214797	3	EFNA5_EPHA3	EFNA5 - EPHA3	EPHA	Cell-Cell Contact	PMID: 15114347	Astrocyte -> Glutamatergic (CC)	0.00950855	Astrocyte -> Glutamatergic	Prefrontal cortex
1075	Fibroblast	Glutamatergic	EFNA5	EPHA3	0.166725	3	EFNA5_EPHA3	EFNA5 - EPHA3	EPHA	Cell-Cell Contact	PMID: 15114347	Fibroblast -> Glutamatergic (CC)	0.00248393	Fibroblast -> Glutamatergic	Prefrontal cortex
1076	GABAergic	Glutamatergic	EFNA5	EPHA3	0.20251	3	EFNA5_EPHA3	EFNA5 - EPHA3	EPHA	Cell-Cell Contact	PMID: 15114347	GABAergic -> Glutamatergic (CC)	0.00716874	GABAergic -> Glutamatergic	Prefrontal cortex
1077	Glutamatergic	Glutamatergic	EFNA5	EPHA3	0.244922	3	EFNA5_EPHA3	EFNA5 - EPHA3	EPHA	Cell-Cell Contact	PMID: 15114347	Glutamatergic -> Glutamatergic (CC)	0.0168579	Glutamatergic -> Glutamatergic	Prefrontal cortex
2852	Astrocyte	Fibroblast	EFNA5	EPHA3	0.194727	3	EFNA5_EPHA3	EFNA5 - EPHA3	EPHA	Cell-Cell Contact	PMID: 15114347	Astrocyte -> Fibroblast (Hippo)	0.00588467	Astrocyte -> Fibroblast	Hippocampus
2853	Fibroblast	Fibroblast	EFNA5	EPHA3	0.186658	3	EFNA5_EPHA3	EFNA5 - EPHA3	EPHA	Cell-Cell Contact	PMID: 15114347	Fibroblast -> Fibroblast (Hippo)	0.00471318	Fibroblast -> Fibroblast	Hippocampus
2854	GABAergic	Fibroblast	EFNA5	EPHA3	0.19025	3	EFNA5_EPHA3	EFNA5 - EPHA3	EPHA	Cell-Cell Contact	PMID: 15114347	GABAergic -> Fibroblast (Hippo)	0.00521483	GABAergic -> Fibroblast	Hippocampus
2855	Glutamatergic	Fibroblast	EFNA5	EPHA3	0.140442	3	EFNA5_EPHA3	EFNA5 - EPHA3	EPHA	Cell-Cell Contact	PMID: 15114347	Glutamatergic -> Fibroblast (Hippo)	0.000808474	Glutamatergic -> Fibroblast	Hippocampus
2856	Astrocyte	Endothelial	EFNA5	EPHA3	0.166935	3	EFNA5_EPHA3	EFNA5 - EPHA3	EPHA	Cell-Cell Contact	PMID: 15114347	Astrocyte -> Endothelial (Hippo)	0.00250273	Astrocyte -> Endothelial	Hippocampus
2857	Fibroblast	Endothelial	EFNA5	EPHA3	0.160952	3	EFNA5_EPHA3	EFNA5 - EPHA3	EPHA	Cell-Cell Contact	PMID: 15114347	Fibroblast -> Endothelial (Hippo)	0.00200315	Fibroblast -> Endothelial	Hippocampus
2858	GABAergic	Endothelial	EFNA5	EPHA3	0.163623	3	EFNA5_EPHA3	EFNA5 - EPHA3	EPHA	Cell-Cell Contact	PMID: 15114347	GABAergic -> Endothelial (Hippo)	0.00221699	GABAergic -> Endothelial	Hippocampus
2859	Glutamatergic	Endothelial	EFNA5	EPHA3	0.125341	3	EFNA5_EPHA3	EFNA5 - EPHA3	EPHA	Cell-Cell Contact	PMID: 15114347	Glutamatergic -> Endothelial (Hippo)	0.000342836	Glutamatergic -> Endothelial	Hippocampus
2860	Astrocyte	GABAergic	EFNA5	EPHA3	0.167347	3	EFNA5_EPHA3	EFNA5 - EPHA3	EPHA	Cell-Cell Contact	PMID: 15114347	Astrocyte -> GABAergic (Hippo)	0.00253991	Astrocyte -> GABAergic	Hippocampus
2861	Fibroblast	GABAergic	EFNA5	EPHA3	0.161335	3	EFNA5_EPHA3	EFNA5 - EPHA3	EPHA	Cell-Cell Contact	PMID: 15114347	Fibroblast -> GABAergic (Hippo)	0.00203292	Fibroblast -> GABAergic	Hippocampus
2862	GABAergic	GABAergic	EFNA5	EPHA3	0.164019	3	EFNA5_EPHA3	EFNA5 - EPHA3	EPHA	Cell-Cell Contact	PMID: 15114347	GABAergic -> GABAergic (Hippo)	0.00224994	GABAergic -> GABAergic	Hippocampus
2863	Glutamatergic	GABAergic	EFNA5	EPHA3	0.125573	3	EFNA5_EPHA3	EFNA5 - EPHA3	EPHA	Cell-Cell Contact	PMID: 15114347	Glutamatergic -> GABAergic (Hippo)	0.00034794	Glutamatergic -> GABAergic	Hippocampus
1078	Astrocyte	Endothelial	EFNA5	EPHA4	0.241878	3	EFNA5_EPHA4	EFNA5 - EPHA4	EPHA	Cell-Cell Contact	PMID: 15114347	Astrocyte -> Endothelial (CC)	0.0160137	Astrocyte -> Endothelial	Prefrontal cortex
1079	GABAergic	Endothelial	EFNA5	EPHA4	0.226493	3	EFNA5_EPHA4	EFNA5 - EPHA4	EPHA	Cell-Cell Contact	PMID: 15114347	GABAergic -> Endothelial (CC)	0.0120927	GABAergic -> Endothelial	Prefrontal cortex
1080	Glutamatergic	Endothelial	EFNA5	EPHA4	0.280368	3	EFNA5_EPHA4	EFNA5 - EPHA4	EPHA	Cell-Cell Contact	PMID: 15114347	Glutamatergic -> Endothelial (CC)	0.0282476	Glutamatergic -> Endothelial	Prefrontal cortex
1081	Astrocyte	GABAergic	EFNA5	EPHA4	0.20149	3	EFNA5_EPHA4	EFNA5 - EPHA4	EPHA	Cell-Cell Contact	PMID: 15114347	Astrocyte -> GABAergic (CC)	0.00699183	Astrocyte -> GABAergic	Prefrontal cortex
1082	GABAergic	GABAergic	EFNA5	EPHA4	0.190618	3	EFNA5_EPHA4	EFNA5 - EPHA4	EPHA	Cell-Cell Contact	PMID: 15114347	GABAergic -> GABAergic (CC)	0.00526802	GABAergic -> GABAergic	Prefrontal cortex
1083	Glutamatergic	GABAergic	EFNA5	EPHA4	0.227873	3	EFNA5_EPHA4	EFNA5 - EPHA4	EPHA	Cell-Cell Contact	PMID: 15114347	Glutamatergic -> GABAergic (CC)	0.0124204	Glutamatergic -> GABAergic	Prefrontal cortex
1084	Astrocyte	Glutamatergic	EFNA5	EPHA4	0.336271	3	EFNA5_EPHA4	EFNA5 - EPHA4	EPHA	Cell-Cell Contact	PMID: 15114347	Astrocyte -> Glutamatergic (CC)	0.0511092	Astrocyte -> Glutamatergic	Prefrontal cortex
1085	Fibroblast	Glutamatergic	EFNA5	EPHA4	0.233393	3	EFNA5_EPHA4	EFNA5 - EPHA4	EPHA	Cell-Cell Contact	PMID: 15114347	Fibroblast -> Glutamatergic (CC)	0.0137788	Fibroblast -> Glutamatergic	Prefrontal cortex
1086	GABAergic	Glutamatergic	EFNA5	EPHA4	0.308085	3	EFNA5_EPHA4	EFNA5 - EPHA4	EPHA	Cell-Cell Contact	PMID: 15114347	GABAergic -> Glutamatergic (CC)	0.038935	GABAergic -> Glutamatergic	Prefrontal cortex
1087	Glutamatergic	Glutamatergic	EFNA5	EPHA4	0.410997	3	EFNA5_EPHA4	EFNA5 - EPHA4	EPHA	Cell-Cell Contact	PMID: 15114347	Glutamatergic -> Glutamatergic (CC)	0.0877637	Glutamatergic -> Glutamatergic	Prefrontal cortex
2864	Astrocyte	Endothelial	EFNA5	EPHA4	0.195245	3	EFNA5_EPHA4	EFNA5 - EPHA4	EPHA	Cell-Cell Contact	PMID: 15114347	Astrocyte -> Endothelial (Hippo)	0.00596542	Astrocyte -> Endothelial	Hippocampus
2865	Fibroblast	Endothelial	EFNA5	EPHA4	0.187135	3	EFNA5_EPHA4	EFNA5 - EPHA4	EPHA	Cell-Cell Contact	PMID: 15114347	Fibroblast -> Endothelial (Hippo)	0.00477793	Fibroblast -> Endothelial	Hippocampus
2866	GABAergic	Endothelial	EFNA5	EPHA4	0.190745	3	EFNA5_EPHA4	EFNA5 - EPHA4	EPHA	Cell-Cell Contact	PMID: 15114347	GABAergic -> Endothelial (Hippo)	0.00528644	GABAergic -> Endothelial	Hippocampus
2867	Glutamatergic	Endothelial	EFNA5	EPHA4	0.140713	3	EFNA5_EPHA4	EFNA5 - EPHA4	EPHA	Cell-Cell Contact	PMID: 15114347	Glutamatergic -> Endothelial (Hippo)	0.000819625	Glutamatergic -> Endothelial	Hippocampus
2868	Astrocyte	GABAergic	EFNA5	EPHA4	0.174728	3	EFNA5_EPHA4	EFNA5 - EPHA4	EPHA	Cell-Cell Contact	PMID: 15114347	Astrocyte -> GABAergic (Hippo)	0.00326931	Astrocyte -> GABAergic	Hippocampus
2869	Fibroblast	GABAergic	EFNA5	EPHA4	0.168189	3	EFNA5_EPHA4	EFNA5 - EPHA4	EPHA	Cell-Cell Contact	PMID: 15114347	Fibroblast -> GABAergic (Hippo)	0.0026171	Fibroblast -> GABAergic	Hippocampus
2870	GABAergic	GABAergic	EFNA5	EPHA4	0.171106	3	EFNA5_EPHA4	EFNA5 - EPHA4	EPHA	Cell-Cell Contact	PMID: 15114347	GABAergic -> GABAergic (Hippo)	0.0028963	GABAergic -> GABAergic	Hippocampus
2871	Glutamatergic	GABAergic	EFNA5	EPHA4	0.129695	3	EFNA5_EPHA4	EFNA5 - EPHA4	EPHA	Cell-Cell Contact	PMID: 15114347	Glutamatergic -> GABAergic (Hippo)	0.000448141	Glutamatergic -> GABAergic	Hippocampus
2872	Astrocyte	Glutamatergic	EFNA5	EPHA4	0.250524	3	EFNA5_EPHA4	EFNA5 - EPHA4	EPHA	Cell-Cell Contact	PMID: 15114347	Astrocyte -> Glutamatergic (Hippo)	0.0184695	Astrocyte -> Glutamatergic	Hippocampus
2873	Fibroblast	Glutamatergic	EFNA5	EPHA4	0.237468	3	EFNA5_EPHA4	EFNA5 - EPHA4	EPHA	Cell-Cell Contact	PMID: 15114347	Fibroblast -> Glutamatergic (Hippo)	0.01483	Fibroblast -> Glutamatergic	Hippocampus
2874	GABAergic	Glutamatergic	EFNA5	EPHA4	0.243248	3	EFNA5_EPHA4	EFNA5 - EPHA4	EPHA	Cell-Cell Contact	PMID: 15114347	GABAergic -> Glutamatergic (Hippo)	0.0163908	GABAergic -> Glutamatergic	Hippocampus
2875	Glutamatergic	Glutamatergic	EFNA5	EPHA4	0.167627	3	EFNA5_EPHA4	EFNA5 - EPHA4	EPHA	Cell-Cell Contact	PMID: 15114347	Glutamatergic -> Glutamatergic (Hippo)	0.00256547	Glutamatergic -> Glutamatergic	Hippocampus
1088	Astrocyte	GABAergic	EFNA5	EPHA5	0.233495	3	EFNA5_EPHA5	EFNA5 - EPHA5	EPHA	Cell-Cell Contact	PMID: 15114347	Astrocyte -> GABAergic (CC)	0.0138047	Astrocyte -> GABAergic	Prefrontal cortex
1089	Fibroblast	GABAergic	EFNA5	EPHA5	0.177876	3	EFNA5_EPHA5	EFNA5 - EPHA5	EPHA	Cell-Cell Contact	PMID: 15114347	Fibroblast -> GABAergic (CC)	0.00361781	Fibroblast -> GABAergic	Prefrontal cortex
1090	GABAergic	GABAergic	EFNA5	EPHA5	0.219099	3	EFNA5_EPHA5	EFNA5 - EPHA5	EPHA	Cell-Cell Contact	PMID: 15114347	GABAergic -> GABAergic (CC)	0.0104189	GABAergic -> GABAergic	Prefrontal cortex
1091	Glutamatergic	GABAergic	EFNA5	EPHA5	0.269291	3	EFNA5_EPHA5	EFNA5 - EPHA5	EPHA	Cell-Cell Contact	PMID: 15114347	Glutamatergic -> GABAergic (CC)	0.0243929	Glutamatergic -> GABAergic	Prefrontal cortex
1092	Astrocyte	Glutamatergic	EFNA5	EPHA5	0.278454	3	EFNA5_EPHA5	EFNA5 - EPHA5	EPHA	Cell-Cell Contact	PMID: 15114347	Astrocyte -> Glutamatergic (CC)	0.0275637	Astrocyte -> Glutamatergic	Prefrontal cortex
1093	Fibroblast	Glutamatergic	EFNA5	EPHA5	0.20325	3	EFNA5_EPHA5	EFNA5 - EPHA5	EPHA	Cell-Cell Contact	PMID: 15114347	Fibroblast -> Glutamatergic (CC)	0.00729878	Fibroblast -> Glutamatergic	Prefrontal cortex
1094	GABAergic	Glutamatergic	EFNA5	EPHA5	0.25845	3	EFNA5_EPHA5	EFNA5 - EPHA5	EPHA	Cell-Cell Contact	PMID: 15114347	GABAergic -> Glutamatergic (CC)	0.0208746	GABAergic -> Glutamatergic	Prefrontal cortex
1095	Glutamatergic	Glutamatergic	EFNA5	EPHA5	0.329748	3	EFNA5_EPHA5	EFNA5 - EPHA5	EPHA	Cell-Cell Contact	PMID: 15114347	Glutamatergic -> Glutamatergic (CC)	0.0481894	Glutamatergic -> Glutamatergic	Prefrontal cortex
2876	Astrocyte	Oligodendrocyte precursor	EFNA5	EPHA5	0.17482	3	EFNA5_EPHA5	EFNA5 - EPHA5	EPHA	Cell-Cell Contact	PMID: 15114347	Astrocyte -> Oligodendrocyte precursor (Hippo)	0.00327918	Astrocyte -> Oligodendrocyte precursor	Hippocampus
2877	Fibroblast	Oligodendrocyte precursor	EFNA5	EPHA5	0.168275	3	EFNA5_EPHA5	EFNA5 - EPHA5	EPHA	Cell-Cell Contact	PMID: 15114347	Fibroblast -> Oligodendrocyte precursor (Hippo)	0.00262501	Fibroblast -> Oligodendrocyte precursor	Hippocampus
2878	GABAergic	Oligodendrocyte precursor	EFNA5	EPHA5	0.171195	3	EFNA5_EPHA5	EFNA5 - EPHA5	EPHA	Cell-Cell Contact	PMID: 15114347	GABAergic -> Oligodendrocyte precursor (Hippo)	0.00290505	GABAergic -> Oligodendrocyte precursor	Hippocampus
2879	Glutamatergic	Oligodendrocyte precursor	EFNA5	EPHA5	0.129746	3	EFNA5_EPHA5	EFNA5 - EPHA5	EPHA	Cell-Cell Contact	PMID: 15114347	Glutamatergic -> Oligodendrocyte precursor (Hippo)	0.000449499	Glutamatergic -> Oligodendrocyte precursor	Hippocampus
2880	Astrocyte	GABAergic	EFNA5	EPHA5	0.220623	3	EFNA5_EPHA5	EFNA5 - EPHA5	EPHA	Cell-Cell Contact	PMID: 15114347	Astrocyte -> GABAergic (Hippo)	0.0107525	Astrocyte -> GABAergic	Hippocampus
2881	Fibroblast	GABAergic	EFNA5	EPHA5	0.210366	3	EFNA5_EPHA5	EFNA5 - EPHA5	EPHA	Cell-Cell Contact	PMID: 15114347	Fibroblast -> GABAergic (Hippo)	0.00862036	Fibroblast -> GABAergic	Hippocampus
2882	GABAergic	GABAergic	EFNA5	EPHA5	0.21492	3	EFNA5_EPHA5	EFNA5 - EPHA5	EPHA	Cell-Cell Contact	PMID: 15114347	GABAergic -> GABAergic (Hippo)	0.00953389	GABAergic -> GABAergic	Hippocampus
2883	Glutamatergic	GABAergic	EFNA5	EPHA5	0.153531	3	EFNA5_EPHA5	EFNA5 - EPHA5	EPHA	Cell-Cell Contact	PMID: 15114347	Glutamatergic -> GABAergic (Hippo)	0.00148351	Glutamatergic -> GABAergic	Hippocampus
2884	Astrocyte	Glutamatergic	EFNA5	EPHA5	0.248442	3	EFNA5_EPHA5	EFNA5 - EPHA5	EPHA	Cell-Cell Contact	PMID: 15114347	Astrocyte -> Glutamatergic (Hippo)	0.0178618	Astrocyte -> Glutamatergic	Hippocampus
2885	Fibroblast	Glutamatergic	EFNA5	EPHA5	0.235589	3	EFNA5_EPHA5	EFNA5 - EPHA5	EPHA	Cell-Cell Contact	PMID: 15114347	Fibroblast -> Glutamatergic (Hippo)	0.0143404	Fibroblast -> Glutamatergic	Hippocampus
2886	GABAergic	Glutamatergic	EFNA5	EPHA5	0.24128	3	EFNA5_EPHA5	EFNA5 - EPHA5	EPHA	Cell-Cell Contact	PMID: 15114347	GABAergic -> Glutamatergic (Hippo)	0.0158504	GABAergic -> Glutamatergic	Hippocampus
2887	Glutamatergic	Glutamatergic	EFNA5	EPHA5	0.166678	3	EFNA5_EPHA5	EFNA5 - EPHA5	EPHA	Cell-Cell Contact	PMID: 15114347	Glutamatergic -> Glutamatergic (Hippo)	0.00247975	Glutamatergic -> Glutamatergic	Hippocampus
1096	Astrocyte	GABAergic	EFNA5	EPHA7	0.237836	3	EFNA5_EPHA7	EFNA5 - EPHA7	EPHA	Cell-Cell Contact	PMID: 15114347	Astrocyte -> GABAergic (CC)	0.0149272	Astrocyte -> GABAergic	Prefrontal cortex
1097	Fibroblast	GABAergic	EFNA5	EPHA7	0.180412	3	EFNA5_EPHA7	EFNA5 - EPHA7	EPHA	Cell-Cell Contact	PMID: 15114347	Fibroblast -> GABAergic (CC)	0.00391526	Fibroblast -> GABAergic	Prefrontal cortex
1098	GABAergic	GABAergic	EFNA5	EPHA7	0.222931	3	EFNA5_EPHA7	EFNA5 - EPHA7	EPHA	Cell-Cell Contact	PMID: 15114347	GABAergic -> GABAergic (CC)	0.0112692	GABAergic -> GABAergic	Prefrontal cortex
1099	Glutamatergic	GABAergic	EFNA5	EPHA7	0.275015	3	EFNA5_EPHA7	EFNA5 - EPHA7	EPHA	Cell-Cell Contact	PMID: 15114347	Glutamatergic -> GABAergic (CC)	0.0263533	Glutamatergic -> GABAergic	Prefrontal cortex
1100	Astrocyte	Glutamatergic	EFNA5	EPHA7	0.224918	3	EFNA5_EPHA7	EFNA5 - EPHA7	EPHA	Cell-Cell Contact	PMID: 15114347	Astrocyte -> Glutamatergic (CC)	0.0117246	Astrocyte -> Glutamatergic	Prefrontal cortex
1101	Fibroblast	Glutamatergic	EFNA5	EPHA7	0.172808	3	EFNA5_EPHA7	EFNA5 - EPHA7	EPHA	Cell-Cell Contact	PMID: 15114347	Fibroblast -> Glutamatergic (CC)	0.0030679	Fibroblast -> Glutamatergic	Prefrontal cortex
1102	GABAergic	Glutamatergic	EFNA5	EPHA7	0.211507	3	EFNA5_EPHA7	EFNA5 - EPHA7	EPHA	Cell-Cell Contact	PMID: 15114347	GABAergic -> Glutamatergic (CC)	0.00884435	GABAergic -> Glutamatergic	Prefrontal cortex
1103	Glutamatergic	Glutamatergic	EFNA5	EPHA7	0.258054	3	EFNA5_EPHA7	EFNA5 - EPHA7	EPHA	Cell-Cell Contact	PMID: 15114347	Glutamatergic -> Glutamatergic (CC)	0.0207509	Glutamatergic -> Glutamatergic	Prefrontal cortex
2888	Astrocyte	GABAergic	EFNA5	EPHA7	0.216103	3	EFNA5_EPHA7	EFNA5 - EPHA7	EPHA	Cell-Cell Contact	PMID: 15114347	Astrocyte -> GABAergic (Hippo)	0.00977986	Astrocyte -> GABAergic	Hippocampus
2889	Fibroblast	GABAergic	EFNA5	EPHA7	0.206244	3	EFNA5_EPHA7	EFNA5 - EPHA7	EPHA	Cell-Cell Contact	PMID: 15114347	Fibroblast -> GABAergic (Hippo)	0.00783906	Fibroblast -> GABAergic	Hippocampus
2890	GABAergic	GABAergic	EFNA5	EPHA7	0.210623	3	EFNA5_EPHA7	EFNA5 - EPHA7	EPHA	Cell-Cell Contact	PMID: 15114347	GABAergic -> GABAergic (Hippo)	0.00867052	GABAergic -> GABAergic	Hippocampus
2891	Glutamatergic	GABAergic	EFNA5	EPHA7	0.151309	3	EFNA5_EPHA7	EFNA5 - EPHA7	EPHA	Cell-Cell Contact	PMID: 15114347	Glutamatergic -> GABAergic (Hippo)	0.00134818	Glutamatergic -> GABAergic	Hippocampus
2892	Astrocyte	Glutamatergic	EFNA5	EPHA7	0.264305	3	EFNA5_EPHA7	EFNA5 - EPHA7	EPHA	Cell-Cell Contact	PMID: 15114347	Astrocyte -> Glutamatergic (Hippo)	0.0227426	Astrocyte -> Glutamatergic	Hippocampus
2893	Fibroblast	Glutamatergic	EFNA5	EPHA7	0.249868	3	EFNA5_EPHA7	EFNA5 - EPHA7	EPHA	Cell-Cell Contact	PMID: 15114347	Fibroblast -> Glutamatergic (Hippo)	0.0182769	Fibroblast -> Glutamatergic	Hippocampus
2894	GABAergic	Glutamatergic	EFNA5	EPHA7	0.256251	3	EFNA5_EPHA7	EFNA5 - EPHA7	EPHA	Cell-Cell Contact	PMID: 15114347	GABAergic -> Glutamatergic (Hippo)	0.0201929	GABAergic -> Glutamatergic	Hippocampus
2895	Glutamatergic	Glutamatergic	EFNA5	EPHA7	0.1738	3	EFNA5_EPHA7	EFNA5 - EPHA7	EPHA	Cell-Cell Contact	PMID: 15114347	Glutamatergic -> Glutamatergic (Hippo)	0.00317091	Glutamatergic -> Glutamatergic	Hippocampus
2896	Astrocyte	GABAergic	EFNA5	EPHB2	0.154009	3	EFNA5_EPHB2	EFNA5 - EPHB2	EPHA	Cell-Cell Contact	PMID:15107857; PMID: 15114347	Astrocyte -> GABAergic (Hippo)	0.0015138	Astrocyte -> GABAergic	Hippocampus
2897	Fibroblast	GABAergic	EFNA5	EPHB2	0.148898	3	EFNA5_EPHB2	EFNA5 - EPHB2	EPHA	Cell-Cell Contact	PMID:15107857; PMID: 15114347	Fibroblast -> GABAergic (Hippo)	0.00121138	Fibroblast -> GABAergic	Hippocampus
2898	GABAergic	GABAergic	EFNA5	EPHB2	0.151184	3	EFNA5_EPHB2	EFNA5 - EPHB2	EPHA	Cell-Cell Contact	PMID:15107857; PMID: 15114347	GABAergic -> GABAergic (Hippo)	0.00134082	GABAergic -> GABAergic	Hippocampus
2899	Glutamatergic	GABAergic	EFNA5	EPHB2	0.117898	3	EFNA5_EPHB2	EFNA5 - EPHB2	EPHA	Cell-Cell Contact	PMID:15107857; PMID: 15114347	Glutamatergic -> GABAergic (Hippo)	0.00020719	Glutamatergic -> GABAergic	Hippocampus
2900	Astrocyte	Glutamatergic	EFNA5	EPHB2	0.156263	3	EFNA5_EPHB2	EFNA5 - EPHB2	EPHA	Cell-Cell Contact	PMID:15107857; PMID: 15114347	Astrocyte -> Glutamatergic (Hippo)	0.00166244	Astrocyte -> Glutamatergic	Hippocampus
2901	Fibroblast	Glutamatergic	EFNA5	EPHB2	0.151005	3	EFNA5_EPHB2	EFNA5 - EPHB2	EPHA	Cell-Cell Contact	PMID:15107857; PMID: 15114347	Fibroblast -> Glutamatergic (Hippo)	0.00133037	Fibroblast -> Glutamatergic	Hippocampus
2902	GABAergic	Glutamatergic	EFNA5	EPHB2	0.153356	3	EFNA5_EPHB2	EFNA5 - EPHB2	EPHA	Cell-Cell Contact	PMID:15107857; PMID: 15114347	GABAergic -> Glutamatergic (Hippo)	0.0014725	GABAergic -> Glutamatergic	Hippocampus
2903	Glutamatergic	Glutamatergic	EFNA5	EPHB2	0.119217	3	EFNA5_EPHB2	EFNA5 - EPHB2	EPHA	Cell-Cell Contact	PMID:15107857; PMID: 15114347	Glutamatergic -> Glutamatergic (Hippo)	0.000227563	Glutamatergic -> Glutamatergic	Hippocampus
1104	Endothelial	Endothelial	EFNB2	EPHA4	0.146466	3	EFNB2_EPHA4	EFNB2 - EPHA4	EPHB	Cell-Cell Contact	PMID: 15114347	Endothelial -> Endothelial (CC)	0.00108351	Endothelial -> Endothelial	Prefrontal cortex
1105	Glutamatergic	Endothelial	EFNB2	EPHA4	0.162743	3	EFNB2_EPHA4	EFNB2 - EPHA4	EPHB	Cell-Cell Contact	PMID: 15114347	Glutamatergic -> Endothelial (CC)	0.00214488	Glutamatergic -> Endothelial	Prefrontal cortex
1106	Endothelial	GABAergic	EFNB2	EPHA4	0.130467	3	EFNB2_EPHA4	EFNB2 - EPHA4	EPHB	Cell-Cell Contact	PMID: 15114347	Endothelial -> GABAergic (CC)	0.00046907	Endothelial -> GABAergic	Prefrontal cortex
1107	Glutamatergic	GABAergic	EFNB2	EPHA4	0.14324	3	EFNB2_EPHA4	EFNB2 - EPHA4	EPHB	Cell-Cell Contact	PMID: 15114347	Glutamatergic -> GABAergic (CC)	0.000929111	Glutamatergic -> GABAergic	Prefrontal cortex
1108	Endothelial	Glutamatergic	EFNB2	EPHA4	0.177519	3	EFNB2_EPHA4	EFNB2 - EPHA4	EPHB	Cell-Cell Contact	PMID: 15114347	Endothelial -> Glutamatergic (CC)	0.0035771	Endothelial -> Glutamatergic	Prefrontal cortex
1109	Glutamatergic	Glutamatergic	EFNB2	EPHA4	0.201907	3	EFNB2_EPHA4	EFNB2 - EPHA4	EPHB	Cell-Cell Contact	PMID: 15114347	Glutamatergic -> Glutamatergic (CC)	0.00706379	Glutamatergic -> Glutamatergic	Prefrontal cortex
2904	Endothelial	Endothelial	EFNB2	EPHA4	0.182468	3	EFNB2_EPHA4	EFNB2 - EPHA4	EPHB	Cell-Cell Contact	PMID: 15114347	Endothelial -> Endothelial (Hippo)	0.00416761	Endothelial -> Endothelial	Hippocampus
2905	Glutamatergic	Endothelial	EFNB2	EPHA4	0.159156	3	EFNB2_EPHA4	EFNB2 - EPHA4	EPHB	Cell-Cell Contact	PMID: 15114347	Glutamatergic -> Endothelial (Hippo)	0.00186754	Glutamatergic -> Endothelial	Hippocampus
2906	Endothelial	GABAergic	EFNB2	EPHA4	0.164403	3	EFNB2_EPHA4	EFNB2 - EPHA4	EPHB	Cell-Cell Contact	PMID: 15114347	Endothelial -> GABAergic (Hippo)	0.00228217	Endothelial -> GABAergic	Hippocampus
2907	Glutamatergic	GABAergic	EFNB2	EPHA4	0.145214	3	EFNB2_EPHA4	EFNB2 - EPHA4	EPHB	Cell-Cell Contact	PMID: 15114347	Glutamatergic -> GABAergic (Hippo)	0.00102159	Glutamatergic -> GABAergic	Hippocampus
2908	Endothelial	Glutamatergic	EFNB2	EPHA4	0.230072	3	EFNB2_EPHA4	EFNB2 - EPHA4	EPHB	Cell-Cell Contact	PMID: 15114347	Endothelial -> Glutamatergic (Hippo)	0.0129524	Endothelial -> Glutamatergic	Hippocampus
2909	Glutamatergic	Glutamatergic	EFNB2	EPHA4	0.194389	3	EFNB2_EPHA4	EFNB2 - EPHA4	EPHB	Cell-Cell Contact	PMID: 15114347	Glutamatergic -> Glutamatergic (Hippo)	0.00583246	Glutamatergic -> Glutamatergic	Hippocampus
1110	Endothelial	Oligodendrocyte precursor	EFNB2	EPHB1	0.137888	3	EFNB2_EPHB1	EFNB2 - EPHB1	EPHB	Cell-Cell Contact	PMID: 15114347	Endothelial -> Oligodendrocyte precursor (CC)	0.000708555	Endothelial -> Oligodendrocyte precursor	Prefrontal cortex
1111	Glutamatergic	Oligodendrocyte precursor	EFNB2	EPHB1	0.152229	3	EFNB2_EPHB1	EFNB2 - EPHB1	EPHB	Cell-Cell Contact	PMID: 15114347	Glutamatergic -> Oligodendrocyte precursor (CC)	0.00140314	Glutamatergic -> Oligodendrocyte precursor	Prefrontal cortex
1112	Endothelial	Newly formed oligodendrocyte	EFNB2	EPHB1	0.194605	3	EFNB2_EPHB1	EFNB2 - EPHB1	EPHB	Cell-Cell Contact	PMID: 15114347	Endothelial -> Newly formed oligodendrocyte (CC)	0.00586585	Endothelial -> Newly formed oligodendrocyte	Prefrontal cortex
1113	Glutamatergic	Newly formed oligodendrocyte	EFNB2	EPHB1	0.224194	3	EFNB2_EPHB1	EFNB2 - EPHB1	EPHB	Cell-Cell Contact	PMID: 15114347	Glutamatergic -> Newly formed oligodendrocyte (CC)	0.0115576	Glutamatergic -> Newly formed oligodendrocyte	Prefrontal cortex
1114	Endothelial	Astrocyte	EFNB2	EPHB1	0.148166	3	EFNB2_EPHB1	EFNB2 - EPHB1	EPHB	Cell-Cell Contact	PMID: 15114347	Endothelial -> Astrocyte (CC)	0.00117182	Endothelial -> Astrocyte	Prefrontal cortex
1115	Glutamatergic	Astrocyte	EFNB2	EPHB1	0.164842	3	EFNB2_EPHB1	EFNB2 - EPHB1	EPHB	Cell-Cell Contact	PMID: 15114347	Glutamatergic -> Astrocyte (CC)	0.00231948	Glutamatergic -> Astrocyte	Prefrontal cortex
1116	Endothelial	Glutamatergic	EFNB2	EPHB1	0.132551	3	EFNB2_EPHB1	EFNB2 - EPHB1	EPHB	Cell-Cell Contact	PMID: 15114347	Endothelial -> Glutamatergic (CC)	0.000529137	Endothelial -> Glutamatergic	Prefrontal cortex
1117	Glutamatergic	Glutamatergic	EFNB2	EPHB1	0.145755	3	EFNB2_EPHB1	EFNB2 - EPHB1	EPHB	Cell-Cell Contact	PMID: 15114347	Glutamatergic -> Glutamatergic (CC)	0.00104803	Glutamatergic -> Glutamatergic	Prefrontal cortex
2910	Endothelial	Oligodendrocyte precursor	EFNB2	EPHB1	0.176206	3	EFNB2_EPHB1	EFNB2 - EPHB1	EPHB	Cell-Cell Contact	PMID: 15114347	Endothelial -> Oligodendrocyte precursor (Hippo)	0.00343003	Endothelial -> Oligodendrocyte precursor	Hippocampus
2911	Glutamatergic	Oligodendrocyte precursor	EFNB2	EPHB1	0.154361	3	EFNB2_EPHB1	EFNB2 - EPHB1	EPHB	Cell-Cell Contact	PMID: 15114347	Glutamatergic -> Oligodendrocyte precursor (Hippo)	0.00153639	Glutamatergic -> Oligodendrocyte precursor	Hippocampus
2912	Endothelial	Newly formed oligodendrocyte	EFNB2	EPHB1	0.274505	3	EFNB2_EPHB1	EFNB2 - EPHB1	EPHB	Cell-Cell Contact	PMID: 15114347	Endothelial -> Newly formed oligodendrocyte (Hippo)	0.0261757	Endothelial -> Newly formed oligodendrocyte	Hippocampus
2913	Glutamatergic	Newly formed oligodendrocyte	EFNB2	EPHB1	0.225562	3	EFNB2_EPHB1	EFNB2 - EPHB1	EPHB	Cell-Cell Contact	PMID: 15114347	Glutamatergic -> Newly formed oligodendrocyte (Hippo)	0.0118744	Glutamatergic -> Newly formed oligodendrocyte	Hippocampus
2914	Endothelial	Astrocyte	EFNB2	EPHB1	0.186216	3	EFNB2_EPHB1	EFNB2 - EPHB1	EPHB	Cell-Cell Contact	PMID: 15114347	Endothelial -> Astrocyte (Hippo)	0.00465363	Endothelial -> Astrocyte	Hippocampus
2915	Glutamatergic	Astrocyte	EFNB2	EPHB1	0.162007	3	EFNB2_EPHB1	EFNB2 - EPHB1	EPHB	Cell-Cell Contact	PMID: 15114347	Glutamatergic -> Astrocyte (Hippo)	0.00208589	Glutamatergic -> Astrocyte	Hippocampus
2916	Endothelial	GABAergic	EFNB2	EPHB1	0.162175	3	EFNB2_EPHB1	EFNB2 - EPHB1	EPHB	Cell-Cell Contact	PMID: 15114347	Endothelial -> GABAergic (Hippo)	0.00209924	Endothelial -> GABAergic	Hippocampus
2917	Glutamatergic	GABAergic	EFNB2	EPHB1	0.143471	3	EFNB2_EPHB1	EFNB2 - EPHB1	EPHB	Cell-Cell Contact	PMID: 15114347	Glutamatergic -> GABAergic (Hippo)	0.000939607	Glutamatergic -> GABAergic	Hippocampus
2918	Endothelial	Glutamatergic	EFNB2	EPHB1	0.1565	3	EFNB2_EPHB1	EFNB2 - EPHB1	EPHB	Cell-Cell Contact	PMID: 15114347	Endothelial -> Glutamatergic (Hippo)	0.0016786	Endothelial -> Glutamatergic	Hippocampus
2919	Glutamatergic	Glutamatergic	EFNB2	EPHB1	0.139007	3	EFNB2_EPHB1	EFNB2 - EPHB1	EPHB	Cell-Cell Contact	PMID: 15114347	Glutamatergic -> Glutamatergic (Hippo)	0.000751157	Glutamatergic -> Glutamatergic	Hippocampus
2920	Endothelial	GABAergic	EFNB2	EPHB2	0.145919	3	EFNB2_EPHB2	EFNB2 - EPHB2	EPHB	Cell-Cell Contact	PMID: 15114347	Endothelial -> GABAergic (Hippo)	0.00105616	Endothelial -> GABAergic	Hippocampus
2921	Glutamatergic	GABAergic	EFNB2	EPHB2	0.13059	3	EFNB2_EPHB2	EFNB2 - EPHB2	EPHB	Cell-Cell Contact	PMID: 15114347	Glutamatergic -> GABAergic (Hippo)	0.000472457	Glutamatergic -> GABAergic	Hippocampus
2922	Endothelial	Glutamatergic	EFNB2	EPHB2	0.147942	3	EFNB2_EPHB2	EFNB2 - EPHB2	EPHB	Cell-Cell Contact	PMID: 15114347	Endothelial -> Glutamatergic (Hippo)	0.00115992	Endothelial -> Glutamatergic	Hippocampus
2923	Glutamatergic	Glutamatergic	EFNB2	EPHB2	0.132209	3	EFNB2_EPHB2	EFNB2 - EPHB2	EPHB	Cell-Cell Contact	PMID: 15114347	Glutamatergic -> Glutamatergic (Hippo)	0.000518902	Glutamatergic -> Glutamatergic	Hippocampus
2723	Microglia	Glutamatergic	ENTPD1	ADORA1	0.145279	3	ENTPD1_ADORA1	ENTPD1 - ADORA1	CD39	Cell-Cell Contact	PMID: 21677139	Microglia -> Glutamatergic (Hippo)	0.00102474	Microglia -> Glutamatergic	Hippocampus
2724	Endothelial	Glutamatergic	ENTPD1	ADORA1	0.12387	3	ENTPD1_ADORA1	ENTPD1 - ADORA1	CD39	Cell-Cell Contact	PMID: 21677139	Endothelial -> Glutamatergic (Hippo)	0.000311847	Endothelial -> Glutamatergic	Hippocampus
965	Microglia (PCDH9high)	Microglia (PCDH9high)	ENTPD1	TMIGD3	0.211377	3	ENTPD1_TMIGD3	ENTPD1 - TMIGD3	CD39	Cell-Cell Contact	PMID: 21677139	Microglia (PCDH9high) -> Microglia (PCDH9high) (CC)	0.00881863	Microglia (PCDH9high) -> Microglia (PCDH9high)	Prefrontal cortex
966	Microglia	Microglia (PCDH9high)	ENTPD1	TMIGD3	0.18637	3	ENTPD1_TMIGD3	ENTPD1 - TMIGD3	CD39	Cell-Cell Contact	PMID: 21677139	Microglia -> Microglia (PCDH9high) (CC)	0.00467439	Microglia -> Microglia (PCDH9high)	Prefrontal cortex
967	Microglia (PCDH9high)	Microglia	ENTPD1	TMIGD3	0.213675	3	ENTPD1_TMIGD3	ENTPD1 - TMIGD3	CD39	Cell-Cell Contact	PMID: 21677139	Microglia (PCDH9high) -> Microglia (CC)	0.00927893	Microglia (PCDH9high) -> Microglia	Prefrontal cortex
968	Microglia	Microglia	ENTPD1	TMIGD3	0.188162	3	ENTPD1_TMIGD3	ENTPD1 - TMIGD3	CD39	Cell-Cell Contact	PMID: 21677139	Microglia -> Microglia (CC)	0.00491945	Microglia -> Microglia	Prefrontal cortex
1118	Endothelial	Endothelial	ESAM	ESAM	0.196507	3	ESAM_ESAM	ESAM - ESAM	ESAM	Cell-Cell Contact	KEGG: hsa04514; PMID: 11279107	Endothelial -> Endothelial (CC)	0.00616495	Endothelial -> Endothelial	Prefrontal cortex
2924	Endothelial	Endothelial	ESAM	ESAM	0.188569	3	ESAM_ESAM	ESAM - ESAM	ESAM	Cell-Cell Contact	KEGG: hsa04514; PMID: 11279107	Endothelial -> Endothelial (Hippo)	0.00497613	Endothelial -> Endothelial	Hippocampus
115	Oligodendrocyte	Oligodendrocyte precursor	FGF1	FGFR1	0.18288	3	FGF1_FGFR1	FGF1 - FGFR1	FGF	Secreted Signaling	PMC: 4393358	Oligodendrocyte -> Oligodendrocyte precursor (CC)	0.00421939	Oligodendrocyte -> Oligodendrocyte precursor	Prefrontal cortex
116	Oligodendrocyte	Fibroblast	FGF1	FGFR1	0.168483	3	FGF1_FGFR1	FGF1 - FGFR1	FGF	Secreted Signaling	PMC: 4393358	Oligodendrocyte -> Fibroblast (CC)	0.00264438	Oligodendrocyte -> Fibroblast	Prefrontal cortex
1741	Oligodendrocyte	Oligodendrocyte precursor	FGF1	FGFR1	0.212265	3	FGF1_FGFR1	FGF1 - FGFR1	FGF	Secreted Signaling	PMC: 4393358	Oligodendrocyte -> Oligodendrocyte precursor (Hippo)	0.00899498	Oligodendrocyte -> Oligodendrocyte precursor	Hippocampus
1742	Oligodendrocyte	Fibroblast	FGF1	FGFR1	0.171542	3	FGF1_FGFR1	FGF1 - FGFR1	FGF	Secreted Signaling	PMC: 4393358	Oligodendrocyte -> Fibroblast (Hippo)	0.0029396	Oligodendrocyte -> Fibroblast	Hippocampus
1743	Oligodendrocyte	Endothelial	FGF1	FGFR1	0.143494	3	FGF1_FGFR1	FGF1 - FGFR1	FGF	Secreted Signaling	PMC: 4393358	Oligodendrocyte -> Endothelial (Hippo)	0.000940661	Oligodendrocyte -> Endothelial	Hippocampus
117	Oligodendrocyte	Microglia (PCDH9high)	FGF1	FGFR2	0.172876	3	FGF1_FGFR2	FGF1 - FGFR2	FGF	Secreted Signaling	PMC: 4393358	Oligodendrocyte -> Microglia (PCDH9high) (CC)	0.00307482	Oligodendrocyte -> Microglia (PCDH9high)	Prefrontal cortex
118	Oligodendrocyte	Oligodendrocyte	FGF1	FGFR2	0.237766	3	FGF1_FGFR2	FGF1 - FGFR2	FGF	Secreted Signaling	PMC: 4393358	Oligodendrocyte -> Oligodendrocyte (CC)	0.0149086	Oligodendrocyte -> Oligodendrocyte	Prefrontal cortex
119	Oligodendrocyte	Astrocyte	FGF1	FGFR2	0.188413	3	FGF1_FGFR2	FGF1 - FGFR2	FGF	Secreted Signaling	PMC: 4393358	Oligodendrocyte -> Astrocyte (CC)	0.00495433	Oligodendrocyte -> Astrocyte	Prefrontal cortex
1744	Oligodendrocyte	Microglia (PCDH9high)	FGF1	FGFR2	0.184514	3	FGF1_FGFR2	FGF1 - FGFR2	FGF	Secreted Signaling	PMC: 4393358	Oligodendrocyte -> Microglia (PCDH9high) (Hippo)	0.00442876	Oligodendrocyte -> Microglia (PCDH9high)	Hippocampus
1745	Oligodendrocyte	Oligodendrocyte	FGF1	FGFR2	0.230622	3	FGF1_FGFR2	FGF1 - FGFR2	FGF	Secreted Signaling	PMC: 4393358	Oligodendrocyte -> Oligodendrocyte (Hippo)	0.0130874	Oligodendrocyte -> Oligodendrocyte	Hippocampus
1746	Oligodendrocyte	Astrocyte	FGF1	FGFR2	0.179841	3	FGF1_FGFR2	FGF1 - FGFR2	FGF	Secreted Signaling	PMC: 4393358	Oligodendrocyte -> Astrocyte (Hippo)	0.00384696	Oligodendrocyte -> Astrocyte	Hippocampus
120	Oligodendrocyte	Astrocyte	FGF1	FGFR3	0.239841	3	FGF1_FGFR3	FGF1 - FGFR3	FGF	Secreted Signaling	PMC: 4393358	Oligodendrocyte -> Astrocyte (CC)	0.0154611	Oligodendrocyte -> Astrocyte	Prefrontal cortex
1747	Oligodendrocyte	Astrocyte	FGF1	FGFR3	0.18182	3	FGF1_FGFR3	FGF1 - FGFR3	FGF	Secreted Signaling	PMC: 4393358	Oligodendrocyte -> Astrocyte (Hippo)	0.00408694	Oligodendrocyte -> Astrocyte	Hippocampus
127	GABAergic	Oligodendrocyte precursor	FGF17	FGFR1	0.162321	3	FGF17_FGFR1	FGF17 - FGFR1	FGF	Secreted Signaling	PMC: 4393358	GABAergic -> Oligodendrocyte precursor (CC)	0.00211095	GABAergic -> Oligodendrocyte precursor	Prefrontal cortex
128	Glutamatergic	Oligodendrocyte precursor	FGF17	FGFR1	0.169049	3	FGF17_FGFR1	FGF17 - FGFR1	FGF	Secreted Signaling	PMC: 4393358	Glutamatergic -> Oligodendrocyte precursor (CC)	0.00269748	Glutamatergic -> Oligodendrocyte precursor	Prefrontal cortex
129	GABAergic	Fibroblast	FGF17	FGFR1	0.15086	3	FGF17_FGFR1	FGF17 - FGFR1	FGF	Secreted Signaling	PMC: 4393358	GABAergic -> Fibroblast (CC)	0.00132193	GABAergic -> Fibroblast	Prefrontal cortex
130	Glutamatergic	Fibroblast	FGF17	FGFR1	0.15666	3	FGF17_FGFR1	FGF17 - FGFR1	FGF	Secreted Signaling	PMC: 4393358	Glutamatergic -> Fibroblast (CC)	0.0016896	Glutamatergic -> Fibroblast	Prefrontal cortex
131	GABAergic	Microglia (PCDH9high)	FGF17	FGFR2	0.154377	3	FGF17_FGFR2	FGF17 - FGFR2	FGF	Secreted Signaling	PMC: 4393358	GABAergic -> Microglia (PCDH9high) (CC)	0.00153744	GABAergic -> Microglia (PCDH9high)	Prefrontal cortex
132	Glutamatergic	Microglia (PCDH9high)	FGF17	FGFR2	0.160454	3	FGF17_FGFR2	FGF17 - FGFR2	FGF	Secreted Signaling	PMC: 4393358	Glutamatergic -> Microglia (PCDH9high) (CC)	0.00196493	Glutamatergic -> Microglia (PCDH9high)	Prefrontal cortex
133	GABAergic	Oligodendrocyte	FGF17	FGFR2	0.204374	3	FGF17_FGFR2	FGF17 - FGFR2	FGF	Secreted Signaling	PMC: 4393358	GABAergic -> Oligodendrocyte (CC)	0.00749892	GABAergic -> Oligodendrocyte	Prefrontal cortex
134	Glutamatergic	Oligodendrocyte	FGF17	FGFR2	0.215086	3	FGF17_FGFR2	FGF17 - FGFR2	FGF	Secreted Signaling	PMC: 4393358	Glutamatergic -> Oligodendrocyte (CC)	0.00956817	Glutamatergic -> Oligodendrocyte	Prefrontal cortex
135	GABAergic	Astrocyte	FGF17	FGFR2	0.166676	3	FGF17_FGFR2	FGF17 - FGFR2	FGF	Secreted Signaling	PMC: 4393358	GABAergic -> Astrocyte (CC)	0.00247955	GABAergic -> Astrocyte	Prefrontal cortex
136	Glutamatergic	Astrocyte	FGF17	FGFR2	0.173774	3	FGF17_FGFR2	FGF17 - FGFR2	FGF	Secreted Signaling	PMC: 4393358	Glutamatergic -> Astrocyte (CC)	0.00316818	Glutamatergic -> Astrocyte	Prefrontal cortex
137	GABAergic	Astrocyte	FGF17	FGFR3	0.205917	3	FGF17_FGFR3	FGF17 - FGFR3	FGF	Secreted Signaling	PMC: 4393358	GABAergic -> Astrocyte (CC)	0.007779	GABAergic -> Astrocyte	Prefrontal cortex
138	Glutamatergic	Astrocyte	FGF17	FGFR3	0.216792	3	FGF17_FGFR3	FGF17 - FGFR3	FGF	Secreted Signaling	PMC: 4393358	Glutamatergic -> Astrocyte (CC)	0.00992476	Glutamatergic -> Astrocyte	Prefrontal cortex
121	Astrocyte	Oligodendrocyte precursor	FGF2	FGFR1	0.191463	3	FGF2_FGFR1	FGF2 - FGFR1	FGF	Secreted Signaling	PMC: 4393358	Astrocyte -> Oligodendrocyte precursor (CC)	0.00539151	Astrocyte -> Oligodendrocyte precursor	Prefrontal cortex
122	Astrocyte	Fibroblast	FGF2	FGFR1	0.175755	3	FGF2_FGFR1	FGF2 - FGFR1	FGF	Secreted Signaling	PMC: 4393358	Astrocyte -> Fibroblast (CC)	0.00338045	Astrocyte -> Fibroblast	Prefrontal cortex
1748	Astrocyte	Oligodendrocyte precursor	FGF2	FGFR1	0.224975	3	FGF2_FGFR1	FGF2 - FGFR1	FGF	Secreted Signaling	PMC: 4393358	Astrocyte -> Oligodendrocyte precursor (Hippo)	0.0117377	Astrocyte -> Oligodendrocyte precursor	Hippocampus
1749	Astrocyte	Fibroblast	FGF2	FGFR1	0.179808	3	FGF2_FGFR1	FGF2 - FGFR1	FGF	Secreted Signaling	PMC: 4393358	Astrocyte -> Fibroblast (Hippo)	0.00384311	Astrocyte -> Fibroblast	Hippocampus
1750	Astrocyte	Endothelial	FGF2	FGFR1	0.149247	3	FGF2_FGFR1	FGF2 - FGFR1	FGF	Secreted Signaling	PMC: 4393358	Astrocyte -> Endothelial (Hippo)	0.00123054	Astrocyte -> Endothelial	Hippocampus
123	Astrocyte	Microglia (PCDH9high)	FGF2	FGFR2	0.180536	3	FGF2_FGFR2	FGF2 - FGFR2	FGF	Secreted Signaling	PMC: 4393358	Astrocyte -> Microglia (PCDH9high) (CC)	0.00393024	Astrocyte -> Microglia (PCDH9high)	Prefrontal cortex
124	Astrocyte	Oligodendrocyte	FGF2	FGFR2	0.252292	3	FGF2_FGFR2	FGF2 - FGFR2	FGF	Secreted Signaling	PMC: 4393358	Astrocyte -> Oligodendrocyte (CC)	0.0189934	Astrocyte -> Oligodendrocyte	Prefrontal cortex
125	Astrocyte	Astrocyte	FGF2	FGFR2	0.197528	3	FGF2_FGFR2	FGF2 - FGFR2	FGF	Secreted Signaling	PMC: 4393358	Astrocyte -> Astrocyte (CC)	0.00632932	Astrocyte -> Astrocyte	Prefrontal cortex
1751	Astrocyte	Microglia (PCDH9high)	FGF2	FGFR2	0.194096	3	FGF2_FGFR2	FGF2 - FGFR2	FGF	Secreted Signaling	PMC: 4393358	Astrocyte -> Microglia (PCDH9high) (Hippo)	0.00578732	Astrocyte -> Microglia (PCDH9high)	Hippocampus
1752	Astrocyte	Oligodendrocyte	FGF2	FGFR2	0.245627	3	FGF2_FGFR2	FGF2 - FGFR2	FGF	Secreted Signaling	PMC: 4393358	Astrocyte -> Oligodendrocyte (Hippo)	0.0170565	Astrocyte -> Oligodendrocyte	Hippocampus
1753	Astrocyte	Astrocyte	FGF2	FGFR2	0.188938	3	FGF2_FGFR2	FGF2 - FGFR2	FGF	Secreted Signaling	PMC: 4393358	Astrocyte -> Astrocyte (Hippo)	0.00502795	Astrocyte -> Astrocyte	Hippocampus
126	Astrocyte	Astrocyte	FGF2	FGFR3	0.25462	3	FGF2_FGFR3	FGF2 - FGFR3	FGF	Secreted Signaling	PMC: 4393358	Astrocyte -> Astrocyte (CC)	0.0196943	Astrocyte -> Astrocyte	Prefrontal cortex
1754	Astrocyte	Astrocyte	FGF2	FGFR3	0.19112	3	FGF2_FGFR3	FGF2 - FGFR3	FGF	Secreted Signaling	PMC: 4393358	Astrocyte -> Astrocyte (Hippo)	0.00534121	Astrocyte -> Astrocyte	Hippocampus
2007	Vascular leptomeningeal cell	GABAergic	FN1	ITGA8_ITGB1	0.192116	3	FN1_ITGA8_ITGB1	FN1 - (ITGA8+ITGB1)	FN1	ECM-Receptor	KEGG: hsa04512	Vascular leptomeningeal cell -> GABAergic (Hippo)	0.00548799	Vascular leptomeningeal cell -> GABAergic	Hippocampus
2008	Endothelial	GABAergic	FN1	ITGA8_ITGB1	0.192659	3	FN1_ITGA8_ITGB1	FN1 - (ITGA8+ITGB1)	FN1	ECM-Receptor	KEGG: hsa04512	Endothelial -> GABAergic (Hippo)	0.00556911	Endothelial -> GABAergic	Hippocampus
2009	Vascular leptomeningeal cell	Glutamatergic	FN1	ITGA8_ITGB1	0.254271	3	FN1_ITGA8_ITGB1	FN1 - (ITGA8+ITGB1)	FN1	ECM-Receptor	KEGG: hsa04512	Vascular leptomeningeal cell -> Glutamatergic (Hippo)	0.0195884	Vascular leptomeningeal cell -> Glutamatergic	Hippocampus
2010	Endothelial	Glutamatergic	FN1	ITGA8_ITGB1	0.255209	3	FN1_ITGA8_ITGB1	FN1 - (ITGA8+ITGB1)	FN1	ECM-Receptor	KEGG: hsa04512	Endothelial -> Glutamatergic (Hippo)	0.0198738	Endothelial -> Glutamatergic	Hippocampus
550	Vascular leptomeningeal cell	Newly formed oligodendrocyte	FN1	ITGAV_ITGB1	0.221362	3	FN1_ITGAV_ITGB1	FN1 - (ITGAV+ITGB1)	FN1	ECM-Receptor	KEGG: hsa04512	Vascular leptomeningeal cell -> Newly formed oligodendrocyte (CC)	0.0109165	Vascular leptomeningeal cell -> Newly formed oligodendrocyte	Prefrontal cortex
551	Fibroblast	Newly formed oligodendrocyte	FN1	ITGAV_ITGB1	0.158851	3	FN1_ITGAV_ITGB1	FN1 - (ITGAV+ITGB1)	FN1	ECM-Receptor	KEGG: hsa04512	Fibroblast -> Newly formed oligodendrocyte (CC)	0.00184515	Fibroblast -> Newly formed oligodendrocyte	Prefrontal cortex
552	Endothelial	Newly formed oligodendrocyte	FN1	ITGAV_ITGB1	0.184586	3	FN1_ITGAV_ITGB1	FN1 - (ITGAV+ITGB1)	FN1	ECM-Receptor	KEGG: hsa04512	Endothelial -> Newly formed oligodendrocyte (CC)	0.00443805	Endothelial -> Newly formed oligodendrocyte	Prefrontal cortex
553	Vascular leptomeningeal cell	Endothelial	FN1	ITGAV_ITGB1	0.28201	3	FN1_ITGAV_ITGB1	FN1 - (ITGAV+ITGB1)	FN1	ECM-Receptor	KEGG: hsa04512	Vascular leptomeningeal cell -> Endothelial (CC)	0.0288406	Vascular leptomeningeal cell -> Endothelial	Prefrontal cortex
554	Fibroblast	Endothelial	FN1	ITGAV_ITGB1	0.188377	3	FN1_ITGAV_ITGB1	FN1 - (ITGAV+ITGB1)	FN1	ECM-Receptor	KEGG: hsa04512	Fibroblast -> Endothelial (CC)	0.00494928	Fibroblast -> Endothelial	Prefrontal cortex
555	Endothelial	Endothelial	FN1	ITGAV_ITGB1	0.225468	3	FN1_ITGAV_ITGB1	FN1 - (ITGAV+ITGB1)	FN1	ECM-Receptor	KEGG: hsa04512	Endothelial -> Endothelial (CC)	0.0118525	Endothelial -> Endothelial	Prefrontal cortex
2225	Vascular leptomeningeal cell	Vascular leptomeningeal cell	FN1	ITGAV_ITGB1	0.246979	3	FN1_ITGAV_ITGB1	FN1 - (ITGAV+ITGB1)	FN1	ECM-Receptor	KEGG: hsa04512	Vascular leptomeningeal cell -> Vascular leptomeningeal cell (Hippo)	0.0174412	Vascular leptomeningeal cell -> Vascular leptomeningeal cell	Hippocampus
2226	Endothelial	Vascular leptomeningeal cell	FN1	ITGAV_ITGB1	0.247867	3	FN1_ITGAV_ITGB1	FN1 - (ITGAV+ITGB1)	FN1	ECM-Receptor	KEGG: hsa04512	Endothelial -> Vascular leptomeningeal cell (Hippo)	0.0176959	Endothelial -> Vascular leptomeningeal cell	Hippocampus
2227	Vascular leptomeningeal cell	Endothelial	FN1	ITGAV_ITGB1	0.320089	3	FN1_ITGAV_ITGB1	FN1 - (ITGAV+ITGB1)	FN1	ECM-Receptor	KEGG: hsa04512	Vascular leptomeningeal cell -> Endothelial (Hippo)	0.043975	Vascular leptomeningeal cell -> Endothelial	Hippocampus
2228	Endothelial	Endothelial	FN1	ITGAV_ITGB1	0.32154	3	FN1_ITGAV_ITGB1	FN1 - (ITGAV+ITGB1)	FN1	ECM-Receptor	KEGG: hsa04512	Endothelial -> Endothelial (Hippo)	0.0445995	Endothelial -> Endothelial	Hippocampus
2229	Vascular leptomeningeal cell	Glutamatergic	FN1	ITGAV_ITGB1	0.209876	3	FN1_ITGAV_ITGB1	FN1 - (ITGAV+ITGB1)	FN1	ECM-Receptor	KEGG: hsa04512	Vascular leptomeningeal cell -> Glutamatergic (Hippo)	0.00852527	Vascular leptomeningeal cell -> Glutamatergic	Hippocampus
2230	Endothelial	Glutamatergic	FN1	ITGAV_ITGB1	0.210522	3	FN1_ITGAV_ITGB1	FN1 - (ITGAV+ITGB1)	FN1	ECM-Receptor	KEGG: hsa04512	Endothelial -> Glutamatergic (Hippo)	0.00865089	Endothelial -> Glutamatergic	Hippocampus
556	Vascular leptomeningeal cell	Oligodendrocyte precursor	FN1	ITGAV_ITGB8	0.269508	3	FN1_ITGAV_ITGB8	FN1 - (ITGAV+ITGB8)	FN1	ECM-Receptor	KEGG: hsa04512	Vascular leptomeningeal cell -> Oligodendrocyte precursor (CC)	0.024466	Vascular leptomeningeal cell -> Oligodendrocyte precursor	Prefrontal cortex
557	Fibroblast	Oligodendrocyte precursor	FN1	ITGAV_ITGB8	0.18259	3	FN1_ITGAV_ITGB8	FN1 - (ITGAV+ITGB8)	FN1	ECM-Receptor	KEGG: hsa04512	Fibroblast -> Oligodendrocyte precursor (CC)	0.00418295	Fibroblast -> Oligodendrocyte precursor	Prefrontal cortex
558	Endothelial	Oligodendrocyte precursor	FN1	ITGAV_ITGB8	0.21728	3	FN1_ITGAV_ITGB8	FN1 - (ITGAV+ITGB8)	FN1	ECM-Receptor	KEGG: hsa04512	Endothelial -> Oligodendrocyte precursor (CC)	0.0100281	Endothelial -> Oligodendrocyte precursor	Prefrontal cortex
559	Vascular leptomeningeal cell	Newly formed oligodendrocyte	FN1	ITGAV_ITGB8	0.223653	3	FN1_ITGAV_ITGB8	FN1 - (ITGAV+ITGB8)	FN1	ECM-Receptor	KEGG: hsa04512	Vascular leptomeningeal cell -> Newly formed oligodendrocyte (CC)	0.0114334	Vascular leptomeningeal cell -> Newly formed oligodendrocyte	Prefrontal cortex
560	Fibroblast	Newly formed oligodendrocyte	FN1	ITGAV_ITGB8	0.160038	3	FN1_ITGAV_ITGB8	FN1 - (ITGAV+ITGB8)	FN1	ECM-Receptor	KEGG: hsa04512	Fibroblast -> Newly formed oligodendrocyte (CC)	0.00193335	Fibroblast -> Newly formed oligodendrocyte	Prefrontal cortex
561	Endothelial	Newly formed oligodendrocyte	FN1	ITGAV_ITGB8	0.186186	3	FN1_ITGAV_ITGB8	FN1 - (ITGAV+ITGB8)	FN1	ECM-Receptor	KEGG: hsa04512	Endothelial -> Newly formed oligodendrocyte (CC)	0.00464964	Endothelial -> Newly formed oligodendrocyte	Prefrontal cortex
562	Vascular leptomeningeal cell	Astrocyte	FN1	ITGAV_ITGB8	0.247254	3	FN1_ITGAV_ITGB8	FN1 - (ITGAV+ITGB8)	FN1	ECM-Receptor	KEGG: hsa04512	Vascular leptomeningeal cell -> Astrocyte (CC)	0.0175198	Vascular leptomeningeal cell -> Astrocyte	Prefrontal cortex
563	Fibroblast	Astrocyte	FN1	ITGAV_ITGB8	0.171922	3	FN1_ITGAV_ITGB8	FN1 - (ITGAV+ITGB8)	FN1	ECM-Receptor	KEGG: hsa04512	Fibroblast -> Astrocyte (CC)	0.00297778	Fibroblast -> Astrocyte	Prefrontal cortex
564	Endothelial	Astrocyte	FN1	ITGAV_ITGB8	0.202408	3	FN1_ITGAV_ITGB8	FN1 - (ITGAV+ITGB8)	FN1	ECM-Receptor	KEGG: hsa04512	Endothelial -> Astrocyte (CC)	0.00715092	Endothelial -> Astrocyte	Prefrontal cortex
2231	Vascular leptomeningeal cell	Microglia (PCDH9high)	FN1	ITGAV_ITGB8	0.248534	3	FN1_ITGAV_ITGB8	FN1 - (ITGAV+ITGB8)	FN1	ECM-Receptor	KEGG: hsa04512	Vascular leptomeningeal cell -> Microglia (PCDH9high) (Hippo)	0.0178886	Vascular leptomeningeal cell -> Microglia (PCDH9high)	Hippocampus
2232	Endothelial	Microglia (PCDH9high)	FN1	ITGAV_ITGB8	0.249433	3	FN1_ITGAV_ITGB8	FN1 - (ITGAV+ITGB8)	FN1	ECM-Receptor	KEGG: hsa04512	Endothelial -> Microglia (PCDH9high) (Hippo)	0.0181497	Endothelial -> Microglia (PCDH9high)	Hippocampus
2233	Vascular leptomeningeal cell	Oligodendrocyte precursor	FN1	ITGAV_ITGB8	0.276032	3	FN1_ITGAV_ITGB8	FN1 - (ITGAV+ITGB8)	FN1	ECM-Receptor	KEGG: hsa04512	Vascular leptomeningeal cell -> Oligodendrocyte precursor (Hippo)	0.0267088	Vascular leptomeningeal cell -> Oligodendrocyte precursor	Hippocampus
2234	Endothelial	Oligodendrocyte precursor	FN1	ITGAV_ITGB8	0.277131	3	FN1_ITGAV_ITGB8	FN1 - (ITGAV+ITGB8)	FN1	ECM-Receptor	KEGG: hsa04512	Endothelial -> Oligodendrocyte precursor (Hippo)	0.027095	Endothelial -> Oligodendrocyte precursor	Hippocampus
2235	Vascular leptomeningeal cell	Newly formed oligodendrocyte	FN1	ITGAV_ITGB8	0.227214	3	FN1_ITGAV_ITGB8	FN1 - (ITGAV+ITGB8)	FN1	ECM-Receptor	KEGG: hsa04512	Vascular leptomeningeal cell -> Newly formed oligodendrocyte (Hippo)	0.0122634	Vascular leptomeningeal cell -> Newly formed oligodendrocyte	Hippocampus
2236	Endothelial	Newly formed oligodendrocyte	FN1	ITGAV_ITGB8	0.227969	3	FN1_ITGAV_ITGB8	FN1 - (ITGAV+ITGB8)	FN1	ECM-Receptor	KEGG: hsa04512	Endothelial -> Newly formed oligodendrocyte (Hippo)	0.0124434	Endothelial -> Newly formed oligodendrocyte	Hippocampus
2237	Vascular leptomeningeal cell	Astrocyte	FN1	ITGAV_ITGB8	0.249598	3	FN1_ITGAV_ITGB8	FN1 - (ITGAV+ITGB8)	FN1	ECM-Receptor	KEGG: hsa04512	Vascular leptomeningeal cell -> Astrocyte (Hippo)	0.0181979	Vascular leptomeningeal cell -> Astrocyte	Hippocampus
2238	Endothelial	Astrocyte	FN1	ITGAV_ITGB8	0.250503	3	FN1_ITGAV_ITGB8	FN1 - (ITGAV+ITGB8)	FN1	ECM-Receptor	KEGG: hsa04512	Endothelial -> Astrocyte (Hippo)	0.0184634	Endothelial -> Astrocyte	Hippocampus
2239	Vascular leptomeningeal cell	Glutamatergic	FN1	ITGAV_ITGB8	0.217964	3	FN1_ITGAV_ITGB8	FN1 - (ITGAV+ITGB8)	FN1	ECM-Receptor	KEGG: hsa04512	Vascular leptomeningeal cell -> Glutamatergic (Hippo)	0.0101741	Vascular leptomeningeal cell -> Glutamatergic	Hippocampus
2240	Endothelial	Glutamatergic	FN1	ITGAV_ITGB8	0.21866	3	FN1_ITGAV_ITGB8	FN1 - (ITGAV+ITGB8)	FN1	ECM-Receptor	KEGG: hsa04512	Endothelial -> Glutamatergic (Hippo)	0.0103238	Endothelial -> Glutamatergic	Hippocampus
2486	Vascular leptomeningeal cell	Astrocyte	FN1	CD44	0.2325	3	FN1_CD44	FN1 - CD44	FN1	ECM-Receptor	KEGG: hsa04512	Vascular leptomeningeal cell -> Astrocyte (Hippo)	0.0135541	Vascular leptomeningeal cell -> Astrocyte	Hippocampus
2487	Endothelial	Astrocyte	FN1	CD44	0.23329	3	FN1_CD44	FN1 - CD44	FN1	ECM-Receptor	KEGG: hsa04512	Endothelial -> Astrocyte (Hippo)	0.0137528	Endothelial -> Astrocyte	Hippocampus
725	Vascular leptomeningeal cell	Astrocyte	FN1	SDC4	0.25644	3	FN1_SDC4	FN1 - SDC4	FN1	ECM-Receptor	KEGG: hsa04512	Vascular leptomeningeal cell -> Astrocyte (CC)	0.0202511	Vascular leptomeningeal cell -> Astrocyte	Prefrontal cortex
726	Fibroblast	Astrocyte	FN1	SDC4	0.176386	3	FN1_SDC4	FN1 - SDC4	FN1	ECM-Receptor	KEGG: hsa04512	Fibroblast -> Astrocyte (CC)	0.00344998	Fibroblast -> Astrocyte	Prefrontal cortex
727	Endothelial	Astrocyte	FN1	SDC4	0.208595	3	FN1_SDC4	FN1 - SDC4	FN1	ECM-Receptor	KEGG: hsa04512	Endothelial -> Astrocyte (CC)	0.00827939	Endothelial -> Astrocyte	Prefrontal cortex
2558	Vascular leptomeningeal cell	Astrocyte	FN1	SDC4	0.244434	3	FN1_SDC4	FN1 - SDC4	FN1	ECM-Receptor	KEGG: hsa04512	Vascular leptomeningeal cell -> Astrocyte (Hippo)	0.0167212	Vascular leptomeningeal cell -> Astrocyte	Hippocampus
2559	Endothelial	Astrocyte	FN1	SDC4	0.245304	3	FN1_SDC4	FN1 - SDC4	FN1	ECM-Receptor	KEGG: hsa04512	Endothelial -> Astrocyte (Hippo)	0.0169655	Endothelial -> Astrocyte	Hippocampus
306	Microglia (PCDH9high)	Microglia (PCDH9high)	GAS6	AXL	0.163699	3	GAS6_AXL	GAS6 - AXL	GAS	Secreted Signaling	PMID: 27801848	Microglia (PCDH9high) -> Microglia (PCDH9high) (CC)	0.0022233	Microglia (PCDH9high) -> Microglia (PCDH9high)	Prefrontal cortex
307	Microglia	Microglia (PCDH9high)	GAS6	AXL	0.162382	3	GAS6_AXL	GAS6 - AXL	GAS	Secreted Signaling	PMID: 27801848	Microglia -> Microglia (PCDH9high) (CC)	0.00211584	Microglia -> Microglia (PCDH9high)	Prefrontal cortex
308	Endothelial	Microglia (PCDH9high)	GAS6	AXL	0.145249	3	GAS6_AXL	GAS6 - AXL	GAS	Secreted Signaling	PMID: 27801848	Endothelial -> Microglia (PCDH9high) (CC)	0.00102329	Endothelial -> Microglia (PCDH9high)	Prefrontal cortex
309	Glutamatergic	Microglia (PCDH9high)	GAS6	AXL	0.135609	3	GAS6_AXL	GAS6 - AXL	GAS	Secreted Signaling	PMID: 27801848	Glutamatergic -> Microglia (PCDH9high) (CC)	0.000627281	Glutamatergic -> Microglia (PCDH9high)	Prefrontal cortex
310	Microglia (PCDH9high)	Vascular leptomeningeal cell	GAS6	AXL	0.192096	3	GAS6_AXL	GAS6 - AXL	GAS	Secreted Signaling	PMID: 27801848	Microglia (PCDH9high) -> Vascular leptomeningeal cell (CC)	0.00548509	Microglia (PCDH9high) -> Vascular leptomeningeal cell	Prefrontal cortex
311	Microglia	Vascular leptomeningeal cell	GAS6	AXL	0.190291	3	GAS6_AXL	GAS6 - AXL	GAS	Secreted Signaling	PMID: 27801848	Microglia -> Vascular leptomeningeal cell (CC)	0.0052208	Microglia -> Vascular leptomeningeal cell	Prefrontal cortex
312	Endothelial	Vascular leptomeningeal cell	GAS6	AXL	0.167226	3	GAS6_AXL	GAS6 - AXL	GAS	Secreted Signaling	PMID: 27801848	Endothelial -> Vascular leptomeningeal cell (CC)	0.00252901	Endothelial -> Vascular leptomeningeal cell	Prefrontal cortex
313	Glutamatergic	Vascular leptomeningeal cell	GAS6	AXL	0.15459	3	GAS6_AXL	GAS6 - AXL	GAS	Secreted Signaling	PMID: 27801848	Glutamatergic -> Vascular leptomeningeal cell (CC)	0.0015512	Glutamatergic -> Vascular leptomeningeal cell	Prefrontal cortex
314	Microglia (PCDH9high)	Microglia (PCDH9high)	GAS6	MERTK	0.236726	3	GAS6_MERTK	GAS6 - MERTK	GAS	Secreted Signaling	PMID: 27801848	Microglia (PCDH9high) -> Microglia (PCDH9high) (CC)	0.0146357	Microglia (PCDH9high) -> Microglia (PCDH9high)	Prefrontal cortex
315	Microglia	Microglia (PCDH9high)	GAS6	MERTK	0.234015	3	GAS6_MERTK	GAS6 - MERTK	GAS	Secreted Signaling	PMID: 27801848	Microglia -> Microglia (PCDH9high) (CC)	0.0139367	Microglia -> Microglia (PCDH9high)	Prefrontal cortex
316	Endothelial	Microglia (PCDH9high)	GAS6	MERTK	0.200259	3	GAS6_MERTK	GAS6 - MERTK	GAS	Secreted Signaling	PMID: 27801848	Endothelial -> Microglia (PCDH9high) (CC)	0.0067817	Endothelial -> Microglia (PCDH9high)	Prefrontal cortex
317	Glutamatergic	Microglia (PCDH9high)	GAS6	MERTK	0.182459	3	GAS6_MERTK	GAS6 - MERTK	GAS	Secreted Signaling	PMID: 27801848	Glutamatergic -> Microglia (PCDH9high) (CC)	0.0041665	Glutamatergic -> Microglia (PCDH9high)	Prefrontal cortex
318	Microglia (PCDH9high)	Astrocyte	GAS6	MERTK	0.191627	3	GAS6_MERTK	GAS6 - MERTK	GAS	Secreted Signaling	PMID: 27801848	Microglia (PCDH9high) -> Astrocyte (CC)	0.00541553	Microglia (PCDH9high) -> Astrocyte	Prefrontal cortex
319	Microglia	Astrocyte	GAS6	MERTK	0.18983	3	GAS6_MERTK	GAS6 - MERTK	GAS	Secreted Signaling	PMID: 27801848	Microglia -> Astrocyte (CC)	0.00515458	Microglia -> Astrocyte	Prefrontal cortex
320	Endothelial	Astrocyte	GAS6	MERTK	0.166869	3	GAS6_MERTK	GAS6 - MERTK	GAS	Secreted Signaling	PMID: 27801848	Endothelial -> Astrocyte (CC)	0.00249685	Endothelial -> Astrocyte	Prefrontal cortex
321	Glutamatergic	Astrocyte	GAS6	MERTK	0.154284	3	GAS6_MERTK	GAS6 - MERTK	GAS	Secreted Signaling	PMID: 27801848	Glutamatergic -> Astrocyte (CC)	0.00153145	Glutamatergic -> Astrocyte	Prefrontal cortex
322	Microglia (PCDH9high)	Microglia	GAS6	MERTK	0.202026	3	GAS6_MERTK	GAS6 - MERTK	GAS	Secreted Signaling	PMID: 27801848	Microglia (PCDH9high) -> Microglia (CC)	0.00708433	Microglia (PCDH9high) -> Microglia	Prefrontal cortex
323	Microglia	Microglia	GAS6	MERTK	0.200033	3	GAS6_MERTK	GAS6 - MERTK	GAS	Secreted Signaling	PMID: 27801848	Microglia -> Microglia (CC)	0.00674351	Microglia -> Microglia	Prefrontal cortex
324	Endothelial	Microglia	GAS6	MERTK	0.174727	3	GAS6_MERTK	GAS6 - MERTK	GAS	Secreted Signaling	PMID: 27801848	Endothelial -> Microglia (CC)	0.00326921	Endothelial -> Microglia	Prefrontal cortex
325	Glutamatergic	Microglia	GAS6	MERTK	0.160986	3	GAS6_MERTK	GAS6 - MERTK	GAS	Secreted Signaling	PMID: 27801848	Glutamatergic -> Microglia (CC)	0.00200578	Glutamatergic -> Microglia	Prefrontal cortex
326	Microglia (PCDH9high)	Oligodendrocyte precursor	GAS6	TYRO3	0.162478	3	GAS6_TYRO3	GAS6 - TYRO3	GAS	Secreted Signaling	PMID: 27801848	Microglia (PCDH9high) -> Oligodendrocyte precursor (CC)	0.00212355	Microglia (PCDH9high) -> Oligodendrocyte precursor	Prefrontal cortex
327	Microglia	Oligodendrocyte precursor	GAS6	TYRO3	0.161181	3	GAS6_TYRO3	GAS6 - TYRO3	GAS	Secreted Signaling	PMID: 27801848	Microglia -> Oligodendrocyte precursor (CC)	0.00202091	Microglia -> Oligodendrocyte precursor	Prefrontal cortex
328	Endothelial	Oligodendrocyte precursor	GAS6	TYRO3	0.144286	3	GAS6_TYRO3	GAS6 - TYRO3	GAS	Secreted Signaling	PMID: 27801848	Endothelial -> Oligodendrocyte precursor (CC)	0.000977328	Endothelial -> Oligodendrocyte precursor	Prefrontal cortex
329	Glutamatergic	Oligodendrocyte precursor	GAS6	TYRO3	0.134769	3	GAS6_TYRO3	GAS6 - TYRO3	GAS	Secreted Signaling	PMID: 27801848	Glutamatergic -> Oligodendrocyte precursor (CC)	0.000599094	Glutamatergic -> Oligodendrocyte precursor	Prefrontal cortex
330	Microglia (PCDH9high)	Glutamatergic	GAS6	TYRO3	0.170863	3	GAS6_TYRO3	GAS6 - TYRO3	GAS	Secreted Signaling	PMID: 27801848	Microglia (PCDH9high) -> Glutamatergic (CC)	0.00287229	Microglia (PCDH9high) -> Glutamatergic	Prefrontal cortex
331	Microglia	Glutamatergic	GAS6	TYRO3	0.16943	3	GAS6_TYRO3	GAS6 - TYRO3	GAS	Secreted Signaling	PMID: 27801848	Microglia -> Glutamatergic (CC)	0.00273355	Microglia -> Glutamatergic	Prefrontal cortex
332	Endothelial	Glutamatergic	GAS6	TYRO3	0.150869	3	GAS6_TYRO3	GAS6 - TYRO3	GAS	Secreted Signaling	PMID: 27801848	Endothelial -> Glutamatergic (CC)	0.00132246	Endothelial -> Glutamatergic	Prefrontal cortex
333	Glutamatergic	Glutamatergic	GAS6	TYRO3	0.140498	3	GAS6_TYRO3	GAS6 - TYRO3	GAS	Secreted Signaling	PMID: 27801848	Glutamatergic -> Glutamatergic (CC)	0.000810764	Glutamatergic -> Glutamatergic	Prefrontal cortex
334	Newly formed oligodendrocyte	Microglia (PCDH9high)	GRN	SORT1	0.19864	3	GRN_SORT1	GRN - SORT1	GRN	Secreted Signaling	PMID: 29555433	Newly formed oligodendrocyte -> Microglia (PCDH9high) (CC)	0.00651123	Newly formed oligodendrocyte -> Microglia (PCDH9high)	Prefrontal cortex
335	Endothelial	Microglia (PCDH9high)	GRN	SORT1	0.187121	3	GRN_SORT1	GRN - SORT1	GRN	Secreted Signaling	PMID: 29555433	Endothelial -> Microglia (PCDH9high) (CC)	0.00477601	Endothelial -> Microglia (PCDH9high)	Prefrontal cortex
336	Newly formed oligodendrocyte	Oligodendrocyte precursor	GRN	SORT1	0.149437	3	GRN_SORT1	GRN - SORT1	GRN	Secreted Signaling	PMID: 29555433	Newly formed oligodendrocyte -> Oligodendrocyte precursor (CC)	0.00124104	Newly formed oligodendrocyte -> Oligodendrocyte precursor	Prefrontal cortex
337	Endothelial	Oligodendrocyte precursor	GRN	SORT1	0.142793	3	GRN_SORT1	GRN - SORT1	GRN	Secreted Signaling	PMID: 29555433	Endothelial -> Oligodendrocyte precursor (CC)	0.000909026	Endothelial -> Oligodendrocyte precursor	Prefrontal cortex
338	Newly formed oligodendrocyte	Oligodendrocyte	GRN	SORT1	0.209513	3	GRN_SORT1	GRN - SORT1	GRN	Secreted Signaling	PMID: 29555433	Newly formed oligodendrocyte -> Oligodendrocyte (CC)	0.00845512	Newly formed oligodendrocyte -> Oligodendrocyte	Prefrontal cortex
339	Endothelial	Oligodendrocyte	GRN	SORT1	0.196758	3	GRN_SORT1	GRN - SORT1	GRN	Secreted Signaling	PMID: 29555433	Endothelial -> Oligodendrocyte (CC)	0.0062051	Endothelial -> Oligodendrocyte	Prefrontal cortex
340	Newly formed oligodendrocyte	Newly formed oligodendrocyte	GRN	SORT1	0.145022	3	GRN_SORT1	GRN - SORT1	GRN	Secreted Signaling	PMID: 29555433	Newly formed oligodendrocyte -> Newly formed oligodendrocyte (CC)	0.00101234	Newly formed oligodendrocyte -> Newly formed oligodendrocyte	Prefrontal cortex
341	Endothelial	Newly formed oligodendrocyte	GRN	SORT1	0.138756	3	GRN_SORT1	GRN - SORT1	GRN	Secreted Signaling	PMID: 29555433	Endothelial -> Newly formed oligodendrocyte (CC)	0.000741465	Endothelial -> Newly formed oligodendrocyte	Prefrontal cortex
342	Newly formed oligodendrocyte	Astrocyte	GRN	SORT1	0.152548	3	GRN_SORT1	GRN - SORT1	GRN	Secreted Signaling	PMID: 29555433	Newly formed oligodendrocyte -> Astrocyte (CC)	0.00142253	Newly formed oligodendrocyte -> Astrocyte	Prefrontal cortex
343	Endothelial	Astrocyte	GRN	SORT1	0.145632	3	GRN_SORT1	GRN - SORT1	GRN	Secreted Signaling	PMID: 29555433	Endothelial -> Astrocyte (CC)	0.00104201	Endothelial -> Astrocyte	Prefrontal cortex
344	Newly formed oligodendrocyte	Microglia	GRN	SORT1	0.162468	3	GRN_SORT1	GRN - SORT1	GRN	Secreted Signaling	PMID: 29555433	Newly formed oligodendrocyte -> Microglia (CC)	0.00212274	Newly formed oligodendrocyte -> Microglia	Prefrontal cortex
345	Endothelial	Microglia	GRN	SORT1	0.154652	3	GRN_SORT1	GRN - SORT1	GRN	Secreted Signaling	PMID: 29555433	Endothelial -> Microglia (CC)	0.0015552	Endothelial -> Microglia	Prefrontal cortex
346	Newly formed oligodendrocyte	Vascular leptomeningeal cell	GRN	SORT1	0.166354	3	GRN_SORT1	GRN - SORT1	GRN	Secreted Signaling	PMID: 29555433	Newly formed oligodendrocyte -> Vascular leptomeningeal cell (CC)	0.002451	Newly formed oligodendrocyte -> Vascular leptomeningeal cell	Prefrontal cortex
347	Endothelial	Vascular leptomeningeal cell	GRN	SORT1	0.158171	3	GRN_SORT1	GRN - SORT1	GRN	Secreted Signaling	PMID: 29555433	Endothelial -> Vascular leptomeningeal cell (CC)	0.00179586	Endothelial -> Vascular leptomeningeal cell	Prefrontal cortex
348	Newly formed oligodendrocyte	Endothelial	GRN	SORT1	0.16905	3	GRN_SORT1	GRN - SORT1	GRN	Secreted Signaling	PMID: 29555433	Newly formed oligodendrocyte -> Endothelial (CC)	0.00269757	Newly formed oligodendrocyte -> Endothelial	Prefrontal cortex
349	Endothelial	Endothelial	GRN	SORT1	0.160608	3	GRN_SORT1	GRN - SORT1	GRN	Secreted Signaling	PMID: 29555433	Endothelial -> Endothelial (CC)	0.00197665	Endothelial -> Endothelial	Prefrontal cortex
350	Newly formed oligodendrocyte	GABAergic	GRN	SORT1	0.150155	3	GRN_SORT1	GRN - SORT1	GRN	Secreted Signaling	PMID: 29555433	Newly formed oligodendrocyte -> GABAergic (CC)	0.00128142	Newly formed oligodendrocyte -> GABAergic	Prefrontal cortex
351	Endothelial	GABAergic	GRN	SORT1	0.143449	3	GRN_SORT1	GRN - SORT1	GRN	Secreted Signaling	PMID: 29555433	Endothelial -> GABAergic (CC)	0.000938612	Endothelial -> GABAergic	Prefrontal cortex
352	Newly formed oligodendrocyte	Glutamatergic	GRN	SORT1	0.181766	3	GRN_SORT1	GRN - SORT1	GRN	Secreted Signaling	PMID: 29555433	Newly formed oligodendrocyte -> Glutamatergic (CC)	0.00408031	Newly formed oligodendrocyte -> Glutamatergic	Prefrontal cortex
353	Endothelial	Glutamatergic	GRN	SORT1	0.172053	3	GRN_SORT1	GRN - SORT1	GRN	Secreted Signaling	PMID: 29555433	Endothelial -> Glutamatergic (CC)	0.00299097	Endothelial -> Glutamatergic	Prefrontal cortex
354	Newly formed oligodendrocyte	Glutamatergic(Pyr)	GRN	SORT1	0.168002	3	GRN_SORT1	GRN - SORT1	GRN	Secreted Signaling	PMID: 29555433	Newly formed oligodendrocyte -> Glutamatergic(Pyr) (CC)	0.00259984	Newly formed oligodendrocyte -> Glutamatergic(Pyr)	Prefrontal cortex
355	Endothelial	Glutamatergic(Pyr)	GRN	SORT1	0.159661	3	GRN_SORT1	GRN - SORT1	GRN	Secreted Signaling	PMID: 29555433	Endothelial -> Glutamatergic(Pyr) (CC)	0.00190499	Endothelial -> Glutamatergic(Pyr)	Prefrontal cortex
1154	Microglia (PCDH9high)	Microglia (PCDH9high)	HLA-DPA1	CD4	0.164093	3	HLA-DPA1_CD4	HLA-DPA1 - CD4	MHC-II	Cell-Cell Contact	KEGG: hsa04514	Microglia (PCDH9high) -> Microglia (PCDH9high) (CC)	0.0022561	Microglia (PCDH9high) -> Microglia (PCDH9high)	Prefrontal cortex
1155	Microglia	Microglia (PCDH9high)	HLA-DPA1	CD4	0.161193	3	HLA-DPA1_CD4	HLA-DPA1 - CD4	MHC-II	Cell-Cell Contact	KEGG: hsa04514	Microglia -> Microglia (PCDH9high) (CC)	0.00202186	Microglia -> Microglia (PCDH9high)	Prefrontal cortex
1156	Microglia (PCDH9high)	Microglia (PCDH9high)	HLA-DRA	CD4	0.181111	3	HLA-DRA_CD4	HLA-DRA - CD4	MHC-II	Cell-Cell Contact	KEGG: hsa04514	Microglia (PCDH9high) -> Microglia (PCDH9high) (CC)	0.00399997	Microglia (PCDH9high) -> Microglia (PCDH9high)	Prefrontal cortex
1157	Microglia	Microglia (PCDH9high)	HLA-DRA	CD4	0.186276	3	HLA-DRA_CD4	HLA-DRA - CD4	MHC-II	Cell-Cell Contact	KEGG: hsa04514	Microglia -> Microglia (PCDH9high) (CC)	0.00466162	Microglia -> Microglia (PCDH9high)	Prefrontal cortex
1158	Microglia (PCDH9high)	Microglia (PCDH9high)	HLA-DRB1	CD4	0.176632	3	HLA-DRB1_CD4	HLA-DRB1 - CD4	MHC-II	Cell-Cell Contact	KEGG: hsa04514	Microglia (PCDH9high) -> Microglia (PCDH9high) (CC)	0.00347731	Microglia (PCDH9high) -> Microglia (PCDH9high)	Prefrontal cortex
1159	Microglia	Microglia (PCDH9high)	HLA-DRB1	CD4	0.182729	3	HLA-DRB1_CD4	HLA-DRB1 - CD4	MHC-II	Cell-Cell Contact	KEGG: hsa04514	Microglia -> Microglia (PCDH9high) (CC)	0.00420037	Microglia -> Microglia (PCDH9high)	Prefrontal cortex
1119	Endothelial	Microglia (PCDH9high)	ICAM2	ITGAM_ITGB2	0.182889	3	ICAM2_ITGAM_ITGB2	ICAM2 - (ITGAM+ITGB2)	ICAM	Cell-Cell Contact	KEGG: hsa04514	Endothelial -> Microglia (PCDH9high) (CC)	0.00422055	Endothelial -> Microglia (PCDH9high)	Prefrontal cortex
1120	Endothelial	Microglia	ICAM2	ITGAM_ITGB2	0.185198	3	ICAM2_ITGAM_ITGB2	ICAM2 - (ITGAM+ITGB2)	ICAM	Cell-Cell Contact	KEGG: hsa04514	Endothelial -> Microglia (CC)	0.00451832	Endothelial -> Microglia	Prefrontal cortex
158	GABAergic	Astrocyte	IGF1	ITGA6_ITGB4	0.16596	3	IGF1_ITGA6_ITGB4	IGF1 - (ITGA6+ITGB4)	IGF	Secreted Signaling	PMID: 28190785; PMID: 28873464	GABAergic -> Astrocyte (CC)	0.00241626	GABAergic -> Astrocyte	Prefrontal cortex
1769	GABAergic	Astrocyte	IGF1	ITGA6_ITGB4	0.195699	3	IGF1_ITGA6_ITGB4	IGF1 - (ITGA6+ITGB4)	IGF	Secreted Signaling	PMID: 28190785; PMID: 28873464	GABAergic -> Astrocyte (Hippo)	0.00603669	GABAergic -> Astrocyte	Hippocampus
149	GABAergic	Microglia (PCDH9high)	IGF1	IGF1R	0.170494	3	IGF1_IGF1R	IGF1 - IGF1R	IGF	Secreted Signaling	PMID: 14604834	GABAergic -> Microglia (PCDH9high) (CC)	0.00283618	GABAergic -> Microglia (PCDH9high)	Prefrontal cortex
150	GABAergic	Oligodendrocyte precursor	IGF1	IGF1R	0.20962	3	IGF1_IGF1R	IGF1 - IGF1R	IGF	Secreted Signaling	PMID: 14604834	GABAergic -> Oligodendrocyte precursor (CC)	0.00847589	GABAergic -> Oligodendrocyte precursor	Prefrontal cortex
151	GABAergic	Oligodendrocyte	IGF1	IGF1R	0.176451	3	IGF1_IGF1R	IGF1 - IGF1R	IGF	Secreted Signaling	PMID: 14604834	GABAergic -> Oligodendrocyte (CC)	0.00345718	GABAergic -> Oligodendrocyte	Prefrontal cortex
152	GABAergic	Newly formed oligodendrocyte	IGF1	IGF1R	0.168787	3	IGF1_IGF1R	IGF1 - IGF1R	IGF	Secreted Signaling	PMID: 14604834	GABAergic -> Newly formed oligodendrocyte (CC)	0.00267283	GABAergic -> Newly formed oligodendrocyte	Prefrontal cortex
153	GABAergic	Astrocyte	IGF1	IGF1R	0.178866	3	IGF1_IGF1R	IGF1 - IGF1R	IGF	Secreted Signaling	PMID: 14604834	GABAergic -> Astrocyte (CC)	0.00373209	GABAergic -> Astrocyte	Prefrontal cortex
154	GABAergic	Fibroblast	IGF1	IGF1R	0.179552	3	IGF1_IGF1R	IGF1 - IGF1R	IGF	Secreted Signaling	PMID: 14604834	GABAergic -> Fibroblast (CC)	0.00381266	GABAergic -> Fibroblast	Prefrontal cortex
155	GABAergic	Endothelial	IGF1	IGF1R	0.228582	3	IGF1_IGF1R	IGF1 - IGF1R	IGF	Secreted Signaling	PMID: 14604834	GABAergic -> Endothelial (CC)	0.0125907	GABAergic -> Endothelial	Prefrontal cortex
156	GABAergic	GABAergic	IGF1	IGF1R	0.198871	3	IGF1_IGF1R	IGF1 - IGF1R	IGF	Secreted Signaling	PMID: 14604834	GABAergic -> GABAergic (CC)	0.00654945	GABAergic -> GABAergic	Prefrontal cortex
157	GABAergic	Glutamatergic	IGF1	IGF1R	0.207633	3	IGF1_IGF1R	IGF1 - IGF1R	IGF	Secreted Signaling	PMID: 14604834	GABAergic -> Glutamatergic (CC)	0.0080975	GABAergic -> Glutamatergic	Prefrontal cortex
1759	GABAergic	Microglia (PCDH9high)	IGF1	IGF1R	0.206179	3	IGF1_IGF1R	IGF1 - IGF1R	IGF	Secreted Signaling	PMID: 14604834	GABAergic -> Microglia (PCDH9high) (Hippo)	0.0078272	GABAergic -> Microglia (PCDH9high)	Hippocampus
1760	GABAergic	Oligodendrocyte precursor	IGF1	IGF1R	0.217658	3	IGF1_IGF1R	IGF1 - IGF1R	IGF	Secreted Signaling	PMID: 14604834	GABAergic -> Oligodendrocyte precursor (Hippo)	0.0101086	GABAergic -> Oligodendrocyte precursor	Hippocampus
1761	GABAergic	Oligodendrocyte	IGF1	IGF1R	0.213535	3	IGF1_IGF1R	IGF1 - IGF1R	IGF	Secreted Signaling	PMID: 14604834	GABAergic -> Oligodendrocyte (Hippo)	0.00925045	GABAergic -> Oligodendrocyte	Hippocampus
1762	GABAergic	Newly formed oligodendrocyte	IGF1	IGF1R	0.194037	3	IGF1_IGF1R	IGF1 - IGF1R	IGF	Secreted Signaling	PMID: 14604834	GABAergic -> Newly formed oligodendrocyte (Hippo)	0.00577825	GABAergic -> Newly formed oligodendrocyte	Hippocampus
1763	GABAergic	Astrocyte	IGF1	IGF1R	0.217585	3	IGF1_IGF1R	IGF1 - IGF1R	IGF	Secreted Signaling	PMID: 14604834	GABAergic -> Astrocyte (Hippo)	0.010093	GABAergic -> Astrocyte	Hippocampus
1764	GABAergic	Vascular leptomeningeal cell	IGF1	IGF1R	0.160387	3	IGF1_IGF1R	IGF1 - IGF1R	IGF	Secreted Signaling	PMID: 14604834	GABAergic -> Vascular leptomeningeal cell (Hippo)	0.00195977	GABAergic -> Vascular leptomeningeal cell	Hippocampus
1765	GABAergic	Fibroblast	IGF1	IGF1R	0.211552	3	IGF1_IGF1R	IGF1 - IGF1R	IGF	Secreted Signaling	PMID: 14604834	GABAergic -> Fibroblast (Hippo)	0.00885317	GABAergic -> Fibroblast	Hippocampus
1766	GABAergic	Endothelial	IGF1	IGF1R	0.30798	3	IGF1_IGF1R	IGF1 - IGF1R	IGF	Secreted Signaling	PMID: 14604834	GABAergic -> Endothelial (Hippo)	0.038892	GABAergic -> Endothelial	Hippocampus
1767	GABAergic	GABAergic	IGF1	IGF1R	0.254263	3	IGF1_IGF1R	IGF1 - IGF1R	IGF	Secreted Signaling	PMID: 14604834	GABAergic -> GABAergic (Hippo)	0.019586	GABAergic -> GABAergic	Hippocampus
1768	GABAergic	Glutamatergic	IGF1	IGF1R	0.24995	3	IGF1_IGF1R	IGF1 - IGF1R	IGF	Secreted Signaling	PMID: 14604834	GABAergic -> Glutamatergic (Hippo)	0.018301	GABAergic -> Glutamatergic	Hippocampus
1121	Microglia (PCDH9high)	Endothelial	ITGB2	ICAM2	0.197155	3	ITGB2_ICAM2	ITGB2 - ICAM2	ITGB2	Cell-Cell Contact	KEGG: hsa04514	Microglia (PCDH9high) -> Endothelial (CC)	0.00626896	Microglia (PCDH9high) -> Endothelial	Prefrontal cortex
1122	Microglia	Endothelial	ITGB2	ICAM2	0.190959	3	ITGB2_ICAM2	ITGB2 - ICAM2	ITGB2	Cell-Cell Contact	KEGG: hsa04514	Microglia -> Endothelial (CC)	0.00531765	Microglia -> Endothelial	Prefrontal cortex
1290	Vascular leptomeningeal cell	Newly formed oligodendrocyte	JAG1	NOTCH1	0.182753	3	JAG1_NOTCH1	JAG1 - NOTCH1	NOTCH	Cell-Cell Contact	PMID: 22353464	Vascular leptomeningeal cell -> Newly formed oligodendrocyte (CC)	0.00420339	Vascular leptomeningeal cell -> Newly formed oligodendrocyte	Prefrontal cortex
1291	Vascular leptomeningeal cell	Endothelial	JAG1	NOTCH1	0.176121	3	JAG1_NOTCH1	JAG1 - NOTCH1	NOTCH	Cell-Cell Contact	PMID: 22353464	Vascular leptomeningeal cell -> Endothelial (CC)	0.00342068	Vascular leptomeningeal cell -> Endothelial	Prefrontal cortex
3117	Vascular leptomeningeal cell	Endothelial	JAG1	NOTCH1	0.170188	3	JAG1_NOTCH1	JAG1 - NOTCH1	NOTCH	Cell-Cell Contact	PMID: 22353464	Vascular leptomeningeal cell -> Endothelial (Hippo)	0.00280638	Vascular leptomeningeal cell -> Endothelial	Hippocampus
3118	Endothelial	Endothelial	JAG1	NOTCH1	0.132728	3	JAG1_NOTCH1	JAG1 - NOTCH1	NOTCH	Cell-Cell Contact	PMID: 22353464	Endothelial -> Endothelial (Hippo)	0.000534497	Endothelial -> Endothelial	Hippocampus
3119	Glutamatergic	Endothelial	JAG1	NOTCH1	0.141729	3	JAG1_NOTCH1	JAG1 - NOTCH1	NOTCH	Cell-Cell Contact	PMID: 22353464	Glutamatergic -> Endothelial (Hippo)	0.000862445	Glutamatergic -> Endothelial	Hippocampus
1292	Vascular leptomeningeal cell	Microglia (PCDH9high)	JAG1	NOTCH2	0.17148	3	JAG1_NOTCH2	JAG1 - NOTCH2	NOTCH	Cell-Cell Contact	PMID: 22353464	Vascular leptomeningeal cell -> Microglia (PCDH9high) (CC)	0.0029334	Vascular leptomeningeal cell -> Microglia (PCDH9high)	Prefrontal cortex
1293	Vascular leptomeningeal cell	Oligodendrocyte precursor	JAG1	NOTCH2	0.183049	3	JAG1_NOTCH2	JAG1 - NOTCH2	NOTCH	Cell-Cell Contact	PMID: 22353464	Vascular leptomeningeal cell -> Oligodendrocyte precursor (CC)	0.00424075	Vascular leptomeningeal cell -> Oligodendrocyte precursor	Prefrontal cortex
1294	Vascular leptomeningeal cell	Newly formed oligodendrocyte	JAG1	NOTCH2	0.173928	3	JAG1_NOTCH2	JAG1 - NOTCH2	NOTCH	Cell-Cell Contact	PMID: 22353464	Vascular leptomeningeal cell -> Newly formed oligodendrocyte (CC)	0.00318437	Vascular leptomeningeal cell -> Newly formed oligodendrocyte	Prefrontal cortex
1295	Vascular leptomeningeal cell	Astrocyte	JAG1	NOTCH2	0.196859	3	JAG1_NOTCH2	JAG1 - NOTCH2	NOTCH	Cell-Cell Contact	PMID: 22353464	Vascular leptomeningeal cell -> Astrocyte (CC)	0.00622134	Vascular leptomeningeal cell -> Astrocyte	Prefrontal cortex
1296	Vascular leptomeningeal cell	Fibroblast	JAG1	NOTCH2	0.184232	3	JAG1_NOTCH2	JAG1 - NOTCH2	NOTCH	Cell-Cell Contact	PMID: 22353464	Vascular leptomeningeal cell -> Fibroblast (CC)	0.00439211	Vascular leptomeningeal cell -> Fibroblast	Prefrontal cortex
3120	Vascular leptomeningeal cell	Oligodendrocyte precursor	JAG1	NOTCH2	0.176685	3	JAG1_NOTCH2	JAG1 - NOTCH2	NOTCH	Cell-Cell Contact	PMID: 22353464	Vascular leptomeningeal cell -> Oligodendrocyte precursor (Hippo)	0.0034833	Vascular leptomeningeal cell -> Oligodendrocyte precursor	Hippocampus
3121	Endothelial	Oligodendrocyte precursor	JAG1	NOTCH2	0.136658	3	JAG1_NOTCH2	JAG1 - NOTCH2	NOTCH	Cell-Cell Contact	PMID: 22353464	Endothelial -> Oligodendrocyte precursor (Hippo)	0.000663788	Endothelial -> Oligodendrocyte precursor	Hippocampus
3122	Glutamatergic	Oligodendrocyte precursor	JAG1	NOTCH2	0.146216	3	JAG1_NOTCH2	JAG1 - NOTCH2	NOTCH	Cell-Cell Contact	PMID: 22353464	Glutamatergic -> Oligodendrocyte precursor (Hippo)	0.00107098	Glutamatergic -> Oligodendrocyte precursor	Hippocampus
3123	Vascular leptomeningeal cell	Astrocyte	JAG1	NOTCH2	0.198235	3	JAG1_NOTCH2	JAG1 - NOTCH2	NOTCH	Cell-Cell Contact	PMID: 22353464	Vascular leptomeningeal cell -> Astrocyte (Hippo)	0.00644455	Vascular leptomeningeal cell -> Astrocyte	Hippocampus
3124	Endothelial	Astrocyte	JAG1	NOTCH2	0.149256	3	JAG1_NOTCH2	JAG1 - NOTCH2	NOTCH	Cell-Cell Contact	PMID: 22353464	Endothelial -> Astrocyte (Hippo)	0.00123105	Endothelial -> Astrocyte	Hippocampus
3125	Glutamatergic	Astrocyte	JAG1	NOTCH2	0.160723	3	JAG1_NOTCH2	JAG1 - NOTCH2	NOTCH	Cell-Cell Contact	PMID: 22353464	Glutamatergic -> Astrocyte (Hippo)	0.00198553	Glutamatergic -> Astrocyte	Hippocampus
3126	Vascular leptomeningeal cell	Fibroblast	JAG1	NOTCH2	0.197518	3	JAG1_NOTCH2	JAG1 - NOTCH2	NOTCH	Cell-Cell Contact	PMID: 22353464	Vascular leptomeningeal cell -> Fibroblast (Hippo)	0.00632761	Vascular leptomeningeal cell -> Fibroblast	Hippocampus
3127	Endothelial	Fibroblast	JAG1	NOTCH2	0.148847	3	JAG1_NOTCH2	JAG1 - NOTCH2	NOTCH	Cell-Cell Contact	PMID: 22353464	Endothelial -> Fibroblast (Hippo)	0.0012086	Endothelial -> Fibroblast	Hippocampus
3128	Glutamatergic	Fibroblast	JAG1	NOTCH2	0.16025	3	JAG1_NOTCH2	JAG1 - NOTCH2	NOTCH	Cell-Cell Contact	PMID: 22353464	Glutamatergic -> Fibroblast (Hippo)	0.00194934	Glutamatergic -> Fibroblast	Hippocampus
1297	Vascular leptomeningeal cell	Vascular leptomeningeal cell	JAG1	NOTCH3	0.273715	3	JAG1_NOTCH3	JAG1 - NOTCH3	NOTCH	Cell-Cell Contact	PMID: 22353464	Vascular leptomeningeal cell -> Vascular leptomeningeal cell (CC)	0.025902	Vascular leptomeningeal cell -> Vascular leptomeningeal cell	Prefrontal cortex
3129	Vascular leptomeningeal cell	Vascular leptomeningeal cell	JAG1	NOTCH3	0.268846	3	JAG1_NOTCH3	JAG1 - NOTCH3	NOTCH	Cell-Cell Contact	PMID: 22353464	Vascular leptomeningeal cell -> Vascular leptomeningeal cell (Hippo)	0.0242435	Vascular leptomeningeal cell -> Vascular leptomeningeal cell	Hippocampus
3130	Endothelial	Vascular leptomeningeal cell	JAG1	NOTCH3	0.186554	3	JAG1_NOTCH3	JAG1 - NOTCH3	NOTCH	Cell-Cell Contact	PMID: 22353464	Endothelial -> Vascular leptomeningeal cell (Hippo)	0.00469915	Endothelial -> Vascular leptomeningeal cell	Hippocampus
3131	Glutamatergic	Vascular leptomeningeal cell	JAG1	NOTCH3	0.20473	3	JAG1_NOTCH3	JAG1 - NOTCH3	NOTCH	Cell-Cell Contact	PMID: 22353464	Glutamatergic -> Vascular leptomeningeal cell (Hippo)	0.00756303	Glutamatergic -> Vascular leptomeningeal cell	Hippocampus
1298	Endothelial	Newly formed oligodendrocyte	JAG2	NOTCH1	0.16084	3	JAG2_NOTCH1	JAG2 - NOTCH1	NOTCH	Cell-Cell Contact	PMID: 22353464	Endothelial -> Newly formed oligodendrocyte (CC)	0.0019945	Endothelial -> Newly formed oligodendrocyte	Prefrontal cortex
1299	Endothelial	Endothelial	JAG2	NOTCH1	0.15567	3	JAG2_NOTCH1	JAG2 - NOTCH1	NOTCH	Cell-Cell Contact	PMID: 22353464	Endothelial -> Endothelial (CC)	0.00162243	Endothelial -> Endothelial	Prefrontal cortex
1300	Endothelial	Microglia (PCDH9high)	JAG2	NOTCH2	0.152027	3	JAG2_NOTCH2	JAG2 - NOTCH2	NOTCH	Cell-Cell Contact	PMID: 22353464	Endothelial -> Microglia (PCDH9high) (CC)	0.00139096	Endothelial -> Microglia (PCDH9high)	Prefrontal cortex
1301	Endothelial	Oligodendrocyte precursor	JAG2	NOTCH2	0.16107	3	JAG2_NOTCH2	JAG2 - NOTCH2	NOTCH	Cell-Cell Contact	PMID: 22353464	Endothelial -> Oligodendrocyte precursor (CC)	0.00201226	Endothelial -> Oligodendrocyte precursor	Prefrontal cortex
1302	Endothelial	Newly formed oligodendrocyte	JAG2	NOTCH2	0.153952	3	JAG2_NOTCH2	JAG2 - NOTCH2	NOTCH	Cell-Cell Contact	PMID: 22353464	Endothelial -> Newly formed oligodendrocyte (CC)	0.00151016	Endothelial -> Newly formed oligodendrocyte	Prefrontal cortex
1303	Endothelial	Astrocyte	JAG2	NOTCH2	0.171697	3	JAG2_NOTCH2	JAG2 - NOTCH2	NOTCH	Cell-Cell Contact	PMID: 22353464	Endothelial -> Astrocyte (CC)	0.00295515	Endothelial -> Astrocyte	Prefrontal cortex
1304	Endothelial	Fibroblast	JAG2	NOTCH2	0.161987	3	JAG2_NOTCH2	JAG2 - NOTCH2	NOTCH	Cell-Cell Contact	PMID: 22353464	Endothelial -> Fibroblast (CC)	0.00208425	Endothelial -> Fibroblast	Prefrontal cortex
1305	Endothelial	Vascular leptomeningeal cell	JAG2	NOTCH3	0.227924	3	JAG2_NOTCH3	JAG2 - NOTCH3	NOTCH	Cell-Cell Contact	PMID: 22353464	Endothelial -> Vascular leptomeningeal cell (CC)	0.0124328	Endothelial -> Vascular leptomeningeal cell	Prefrontal cortex
2925	Endothelial	Vascular leptomeningeal cell	JAM2	ITGAV_ITGB1	0.177158	3	JAM2_ITGAV_ITGB1	JAM2 - (ITGAV+ITGB1)	JAM	Cell-Cell Contact	KEGG: hsa04514	Endothelial -> Vascular leptomeningeal cell (Hippo)	0.00353627	Endothelial -> Vascular leptomeningeal cell	Hippocampus
2926	Endothelial	Endothelial	JAM2	ITGAV_ITGB1	0.212851	3	JAM2_ITGAV_ITGB1	JAM2 - (ITGAV+ITGB1)	JAM	Cell-Cell Contact	KEGG: hsa04514	Endothelial -> Endothelial (Hippo)	0.00911228	Endothelial -> Endothelial	Hippocampus
2927	Endothelial	Glutamatergic	JAM2	ITGAV_ITGB1	0.157043	3	JAM2_ITGAV_ITGB1	JAM2 - (ITGAV+ITGB1)	JAM	Cell-Cell Contact	KEGG: hsa04514	Endothelial -> Glutamatergic (Hippo)	0.00171612	Endothelial -> Glutamatergic	Hippocampus
2935	Endothelial	Endothelial	JAM2	JAM2	0.170901	3	JAM2_JAM2	JAM2 - JAM2	JAM	Cell-Cell Contact	KEGG: hsa04514	Endothelial -> Endothelial (Hippo)	0.002876	Endothelial -> Endothelial	Hippocampus
2928	Endothelial	Microglia (PCDH9high)	JAM2	JAM3	0.187807	3	JAM2_JAM3	JAM2 - JAM3	JAM	Cell-Cell Contact	PMC1237098; PMID: 11590146	Endothelial -> Microglia (PCDH9high) (Hippo)	0.00487022	Endothelial -> Microglia (PCDH9high)	Hippocampus
2929	Endothelial	Oligodendrocyte precursor	JAM2	JAM3	0.168845	3	JAM2_JAM3	JAM2 - JAM3	JAM	Cell-Cell Contact	PMC1237098; PMID: 11590146	Endothelial -> Oligodendrocyte precursor (Hippo)	0.00267825	Endothelial -> Oligodendrocyte precursor	Hippocampus
2930	Endothelial	Oligodendrocyte	JAM2	JAM3	0.229102	3	JAM2_JAM3	JAM2 - JAM3	JAM	Cell-Cell Contact	PMC1237098; PMID: 11590146	Endothelial -> Oligodendrocyte (Hippo)	0.0127163	Endothelial -> Oligodendrocyte	Hippocampus
2931	Endothelial	Newly formed oligodendrocyte	JAM2	JAM3	0.168286	3	JAM2_JAM3	JAM2 - JAM3	JAM	Cell-Cell Contact	PMC1237098; PMID: 11590146	Endothelial -> Newly formed oligodendrocyte (Hippo)	0.00262607	Endothelial -> Newly formed oligodendrocyte	Hippocampus
2932	Endothelial	Vascular leptomeningeal cell	JAM2	JAM3	0.171735	3	JAM2_JAM3	JAM2 - JAM3	JAM	Cell-Cell Contact	PMC1237098; PMID: 11590146	Endothelial -> Vascular leptomeningeal cell (Hippo)	0.00295891	Endothelial -> Vascular leptomeningeal cell	Hippocampus
2933	Endothelial	GABAergic	JAM2	JAM3	0.163806	3	JAM2_JAM3	JAM2 - JAM3	JAM	Cell-Cell Contact	PMC1237098; PMID: 11590146	Endothelial -> GABAergic (Hippo)	0.00223214	Endothelial -> GABAergic	Hippocampus
2934	Endothelial	Glutamatergic	JAM2	JAM3	0.203173	3	JAM2_JAM3	JAM2 - JAM3	JAM	Cell-Cell Contact	PMC1237098; PMID: 11590146	Endothelial -> Glutamatergic (Hippo)	0.0072851	Endothelial -> Glutamatergic	Hippocampus
1123	Microglia (PCDH9high)	Microglia (PCDH9high)	JAM3	ITGAM_ITGB2	0.174261	3	JAM3_ITGAM_ITGB2	JAM3 - (ITGAM+ITGB2)	JAM	Cell-Cell Contact	KEGG: hsa04514; PMID: 16118203, PMC2194005	Microglia (PCDH9high) -> Microglia (PCDH9high) (CC)	0.00321955	Microglia (PCDH9high) -> Microglia (PCDH9high)	Prefrontal cortex
1124	Oligodendrocyte precursor	Microglia (PCDH9high)	JAM3	ITGAM_ITGB2	0.16128	3	JAM3_ITGAM_ITGB2	JAM3 - (ITGAM+ITGB2)	JAM	Cell-Cell Contact	KEGG: hsa04514; PMID: 16118203, PMC2194005	Oligodendrocyte precursor -> Microglia (PCDH9high) (CC)	0.00202865	Oligodendrocyte precursor -> Microglia (PCDH9high)	Prefrontal cortex
1125	Oligodendrocyte	Microglia (PCDH9high)	JAM3	ITGAM_ITGB2	0.223019	3	JAM3_ITGAM_ITGB2	JAM3 - (ITGAM+ITGB2)	JAM	Cell-Cell Contact	KEGG: hsa04514; PMID: 16118203, PMC2194005	Oligodendrocyte -> Microglia (PCDH9high) (CC)	0.011289	Oligodendrocyte -> Microglia (PCDH9high)	Prefrontal cortex
1126	Newly formed oligodendrocyte	Microglia (PCDH9high)	JAM3	ITGAM_ITGB2	0.155864	3	JAM3_ITGAM_ITGB2	JAM3 - (ITGAM+ITGB2)	JAM	Cell-Cell Contact	KEGG: hsa04514; PMID: 16118203, PMC2194005	Newly formed oligodendrocyte -> Microglia (PCDH9high) (CC)	0.00163546	Newly formed oligodendrocyte -> Microglia (PCDH9high)	Prefrontal cortex
1127	Vascular leptomeningeal cell	Microglia (PCDH9high)	JAM3	ITGAM_ITGB2	0.159624	3	JAM3_ITGAM_ITGB2	JAM3 - (ITGAM+ITGB2)	JAM	Cell-Cell Contact	KEGG: hsa04514; PMID: 16118203, PMC2194005	Vascular leptomeningeal cell -> Microglia (PCDH9high) (CC)	0.00190222	Vascular leptomeningeal cell -> Microglia (PCDH9high)	Prefrontal cortex
1128	Fibroblast	Microglia (PCDH9high)	JAM3	ITGAM_ITGB2	0.164234	3	JAM3_ITGAM_ITGB2	JAM3 - (ITGAM+ITGB2)	JAM	Cell-Cell Contact	KEGG: hsa04514; PMID: 16118203, PMC2194005	Fibroblast -> Microglia (PCDH9high) (CC)	0.00226799	Fibroblast -> Microglia (PCDH9high)	Prefrontal cortex
1129	Glutamatergic	Microglia (PCDH9high)	JAM3	ITGAM_ITGB2	0.163894	3	JAM3_ITGAM_ITGB2	JAM3 - (ITGAM+ITGB2)	JAM	Cell-Cell Contact	KEGG: hsa04514; PMID: 16118203, PMC2194005	Glutamatergic -> Microglia (PCDH9high) (CC)	0.00223948	Glutamatergic -> Microglia (PCDH9high)	Prefrontal cortex
1130	Microglia (PCDH9high)	Microglia	JAM3	ITGAM_ITGB2	0.176359	3	JAM3_ITGAM_ITGB2	JAM3 - (ITGAM+ITGB2)	JAM	Cell-Cell Contact	KEGG: hsa04514; PMID: 16118203, PMC2194005	Microglia (PCDH9high) -> Microglia (CC)	0.00344694	Microglia (PCDH9high) -> Microglia	Prefrontal cortex
1131	Oligodendrocyte precursor	Microglia	JAM3	ITGAM_ITGB2	0.163078	3	JAM3_ITGAM_ITGB2	JAM3 - (ITGAM+ITGB2)	JAM	Cell-Cell Contact	KEGG: hsa04514; PMID: 16118203, PMC2194005	Oligodendrocyte precursor -> Microglia (CC)	0.00217212	Oligodendrocyte precursor -> Microglia	Prefrontal cortex
1132	Oligodendrocyte	Microglia	JAM3	ITGAM_ITGB2	0.226436	3	JAM3_ITGAM_ITGB2	JAM3 - (ITGAM+ITGB2)	JAM	Cell-Cell Contact	KEGG: hsa04514; PMID: 16118203, PMC2194005	Oligodendrocyte -> Microglia (CC)	0.0120794	Oligodendrocyte -> Microglia	Prefrontal cortex
1133	Newly formed oligodendrocyte	Microglia	JAM3	ITGAM_ITGB2	0.157543	3	JAM3_ITGAM_ITGB2	JAM3 - (ITGAM+ITGB2)	JAM	Cell-Cell Contact	KEGG: hsa04514; PMID: 16118203, PMC2194005	Newly formed oligodendrocyte -> Microglia (CC)	0.00175117	Newly formed oligodendrocyte -> Microglia	Prefrontal cortex
1134	Vascular leptomeningeal cell	Microglia	JAM3	ITGAM_ITGB2	0.161384	3	JAM3_ITGAM_ITGB2	JAM3 - (ITGAM+ITGB2)	JAM	Cell-Cell Contact	KEGG: hsa04514; PMID: 16118203, PMC2194005	Vascular leptomeningeal cell -> Microglia (CC)	0.00203676	Vascular leptomeningeal cell -> Microglia	Prefrontal cortex
1135	Fibroblast	Microglia	JAM3	ITGAM_ITGB2	0.166098	3	JAM3_ITGAM_ITGB2	JAM3 - (ITGAM+ITGB2)	JAM	Cell-Cell Contact	KEGG: hsa04514; PMID: 16118203, PMC2194005	Fibroblast -> Microglia (CC)	0.00242834	Fibroblast -> Microglia	Prefrontal cortex
1136	Glutamatergic	Microglia	JAM3	ITGAM_ITGB2	0.16575	3	JAM3_ITGAM_ITGB2	JAM3 - (ITGAM+ITGB2)	JAM	Cell-Cell Contact	KEGG: hsa04514; PMID: 16118203, PMC2194005	Glutamatergic -> Microglia (CC)	0.00239782	Glutamatergic -> Microglia	Prefrontal cortex
2936	Microglia (PCDH9high)	Endothelial	JAM3	JAM2	0.187807	3	JAM3_JAM2	JAM3 - JAM2	JAM	Cell-Cell Contact	KEGG: hsa04514	Microglia (PCDH9high) -> Endothelial (Hippo)	0.00487022	Microglia (PCDH9high) -> Endothelial	Hippocampus
2937	Oligodendrocyte precursor	Endothelial	JAM3	JAM2	0.168845	3	JAM3_JAM2	JAM3 - JAM2	JAM	Cell-Cell Contact	KEGG: hsa04514	Oligodendrocyte precursor -> Endothelial (Hippo)	0.00267825	Oligodendrocyte precursor -> Endothelial	Hippocampus
2938	Oligodendrocyte	Endothelial	JAM3	JAM2	0.229102	3	JAM3_JAM2	JAM3 - JAM2	JAM	Cell-Cell Contact	KEGG: hsa04514	Oligodendrocyte -> Endothelial (Hippo)	0.0127163	Oligodendrocyte -> Endothelial	Hippocampus
2939	Newly formed oligodendrocyte	Endothelial	JAM3	JAM2	0.168286	3	JAM3_JAM2	JAM3 - JAM2	JAM	Cell-Cell Contact	KEGG: hsa04514	Newly formed oligodendrocyte -> Endothelial (Hippo)	0.00262607	Newly formed oligodendrocyte -> Endothelial	Hippocampus
2940	Vascular leptomeningeal cell	Endothelial	JAM3	JAM2	0.171735	3	JAM3_JAM2	JAM3 - JAM2	JAM	Cell-Cell Contact	KEGG: hsa04514	Vascular leptomeningeal cell -> Endothelial (Hippo)	0.00295891	Vascular leptomeningeal cell -> Endothelial	Hippocampus
2941	GABAergic	Endothelial	JAM3	JAM2	0.163806	3	JAM3_JAM2	JAM3 - JAM2	JAM	Cell-Cell Contact	KEGG: hsa04514	GABAergic -> Endothelial (Hippo)	0.00223214	GABAergic -> Endothelial	Hippocampus
2942	Glutamatergic	Endothelial	JAM3	JAM2	0.203173	3	JAM3_JAM2	JAM3 - JAM2	JAM	Cell-Cell Contact	KEGG: hsa04514	Glutamatergic -> Endothelial (Hippo)	0.0072851	Glutamatergic -> Endothelial	Hippocampus
1137	Oligodendrocyte	Microglia (PCDH9high)	JAM3	JAM3	0.238397	3	JAM3_JAM3	JAM3 - JAM3	JAM	Cell-Cell Contact	KEGG: hsa04514	Oligodendrocyte -> Microglia (PCDH9high) (CC)	0.0150756	Oligodendrocyte -> Microglia (PCDH9high)	Prefrontal cortex
1138	Oligodendrocyte	Oligodendrocyte precursor	JAM3	JAM3	0.214955	3	JAM3_JAM3	JAM3 - JAM3	JAM	Cell-Cell Contact	KEGG: hsa04514	Oligodendrocyte -> Oligodendrocyte precursor (CC)	0.00954115	Oligodendrocyte -> Oligodendrocyte precursor	Prefrontal cortex
1139	Microglia (PCDH9high)	Oligodendrocyte	JAM3	JAM3	0.238397	3	JAM3_JAM3	JAM3 - JAM3	JAM	Cell-Cell Contact	KEGG: hsa04514	Microglia (PCDH9high) -> Oligodendrocyte (CC)	0.0150756	Microglia (PCDH9high) -> Oligodendrocyte	Prefrontal cortex
1140	Oligodendrocyte precursor	Oligodendrocyte	JAM3	JAM3	0.214955	3	JAM3_JAM3	JAM3 - JAM3	JAM	Cell-Cell Contact	KEGG: hsa04514	Oligodendrocyte precursor -> Oligodendrocyte (CC)	0.00954115	Oligodendrocyte precursor -> Oligodendrocyte	Prefrontal cortex
1141	Oligodendrocyte	Oligodendrocyte	JAM3	JAM3	0.33676	3	JAM3_JAM3	JAM3 - JAM3	JAM	Cell-Cell Contact	KEGG: hsa04514	Oligodendrocyte -> Oligodendrocyte (CC)	0.0513305	Oligodendrocyte -> Oligodendrocyte	Prefrontal cortex
1142	Newly formed oligodendrocyte	Oligodendrocyte	JAM3	JAM3	0.205502	3	JAM3_JAM3	JAM3 - JAM3	JAM	Cell-Cell Contact	KEGG: hsa04514	Newly formed oligodendrocyte -> Oligodendrocyte (CC)	0.00770312	Newly formed oligodendrocyte -> Oligodendrocyte	Prefrontal cortex
1143	Vascular leptomeningeal cell	Oligodendrocyte	JAM3	JAM3	0.212043	3	JAM3_JAM3	JAM3 - JAM3	JAM	Cell-Cell Contact	KEGG: hsa04514	Vascular leptomeningeal cell -> Oligodendrocyte (CC)	0.0089507	Vascular leptomeningeal cell -> Oligodendrocyte	Prefrontal cortex
1144	Fibroblast	Oligodendrocyte	JAM3	JAM3	0.220191	3	JAM3_JAM3	JAM3 - JAM3	JAM	Cell-Cell Contact	KEGG: hsa04514	Fibroblast -> Oligodendrocyte (CC)	0.0106573	Fibroblast -> Oligodendrocyte	Prefrontal cortex
1145	Glutamatergic	Oligodendrocyte	JAM3	JAM3	0.219585	3	JAM3_JAM3	JAM3 - JAM3	JAM	Cell-Cell Contact	KEGG: hsa04514	Glutamatergic -> Oligodendrocyte (CC)	0.0105245	Glutamatergic -> Oligodendrocyte	Prefrontal cortex
1146	Oligodendrocyte	Newly formed oligodendrocyte	JAM3	JAM3	0.205502	3	JAM3_JAM3	JAM3 - JAM3	JAM	Cell-Cell Contact	KEGG: hsa04514	Oligodendrocyte -> Newly formed oligodendrocyte (CC)	0.00770312	Oligodendrocyte -> Newly formed oligodendrocyte	Prefrontal cortex
1147	Oligodendrocyte	Vascular leptomeningeal cell	JAM3	JAM3	0.212043	3	JAM3_JAM3	JAM3 - JAM3	JAM	Cell-Cell Contact	KEGG: hsa04514	Oligodendrocyte -> Vascular leptomeningeal cell (CC)	0.0089507	Oligodendrocyte -> Vascular leptomeningeal cell	Prefrontal cortex
1148	Oligodendrocyte	Fibroblast	JAM3	JAM3	0.220191	3	JAM3_JAM3	JAM3 - JAM3	JAM	Cell-Cell Contact	KEGG: hsa04514	Oligodendrocyte -> Fibroblast (CC)	0.0106573	Oligodendrocyte -> Fibroblast	Prefrontal cortex
1149	Oligodendrocyte	Glutamatergic	JAM3	JAM3	0.219585	3	JAM3_JAM3	JAM3 - JAM3	JAM	Cell-Cell Contact	KEGG: hsa04514	Oligodendrocyte -> Glutamatergic (CC)	0.0105245	Oligodendrocyte -> Glutamatergic	Prefrontal cortex
2943	Microglia (PCDH9high)	Microglia (PCDH9high)	JAM3	JAM3	0.208365	3	JAM3_JAM3	JAM3 - JAM3	JAM	Cell-Cell Contact	KEGG: hsa04514	Microglia (PCDH9high) -> Microglia (PCDH9high) (Hippo)	0.00823582	Microglia (PCDH9high) -> Microglia (PCDH9high)	Hippocampus
2944	Oligodendrocyte	Microglia (PCDH9high)	JAM3	JAM3	0.260081	3	JAM3_JAM3	JAM3 - JAM3	JAM	Cell-Cell Contact	KEGG: hsa04514	Oligodendrocyte -> Microglia (PCDH9high) (Hippo)	0.0213874	Oligodendrocyte -> Microglia (PCDH9high)	Hippocampus
2945	Glutamatergic	Microglia (PCDH9high)	JAM3	JAM3	0.227363	3	JAM3_JAM3	JAM3 - JAM3	JAM	Cell-Cell Contact	KEGG: hsa04514	Glutamatergic -> Microglia (PCDH9high) (Hippo)	0.0122989	Glutamatergic -> Microglia (PCDH9high)	Hippocampus
2946	Oligodendrocyte	Oligodendrocyte precursor	JAM3	JAM3	0.225457	3	JAM3_JAM3	JAM3 - JAM3	JAM	Cell-Cell Contact	KEGG: hsa04514	Oligodendrocyte -> Oligodendrocyte precursor (Hippo)	0.01185	Oligodendrocyte -> Oligodendrocyte precursor	Hippocampus
2947	Glutamatergic	Oligodendrocyte precursor	JAM3	JAM3	0.200286	3	JAM3_JAM3	JAM3 - JAM3	JAM	Cell-Cell Contact	KEGG: hsa04514	Glutamatergic -> Oligodendrocyte precursor (Hippo)	0.00678625	Glutamatergic -> Oligodendrocyte precursor	Hippocampus
2948	Microglia (PCDH9high)	Oligodendrocyte	JAM3	JAM3	0.260081	3	JAM3_JAM3	JAM3 - JAM3	JAM	Cell-Cell Contact	KEGG: hsa04514	Microglia (PCDH9high) -> Oligodendrocyte (Hippo)	0.0213874	Microglia (PCDH9high) -> Oligodendrocyte	Hippocampus
2949	Oligodendrocyte precursor	Oligodendrocyte	JAM3	JAM3	0.225457	3	JAM3_JAM3	JAM3 - JAM3	JAM	Cell-Cell Contact	KEGG: hsa04514	Oligodendrocyte precursor -> Oligodendrocyte (Hippo)	0.01185	Oligodendrocyte precursor -> Oligodendrocyte	Hippocampus
2950	Oligodendrocyte	Oligodendrocyte	JAM3	JAM3	0.343454	3	JAM3_JAM3	JAM3 - JAM3	JAM	Cell-Cell Contact	KEGG: hsa04514	Oligodendrocyte -> Oligodendrocyte (Hippo)	0.0543889	Oligodendrocyte -> Oligodendrocyte	Hippocampus
2951	Newly formed oligodendrocyte	Oligodendrocyte	JAM3	JAM3	0.224471	3	JAM3_JAM3	JAM3 - JAM3	JAM	Cell-Cell Contact	KEGG: hsa04514	Newly formed oligodendrocyte -> Oligodendrocyte (Hippo)	0.0116212	Newly formed oligodendrocyte -> Oligodendrocyte	Hippocampus
2952	Vascular leptomeningeal cell	Oligodendrocyte	JAM3	JAM3	0.230588	3	JAM3_JAM3	JAM3 - JAM3	JAM	Cell-Cell Contact	KEGG: hsa04514	Vascular leptomeningeal cell -> Oligodendrocyte (Hippo)	0.0130792	Vascular leptomeningeal cell -> Oligodendrocyte	Hippocampus
2953	GABAergic	Oligodendrocyte	JAM3	JAM3	0.216633	3	JAM3_JAM3	JAM3 - JAM3	JAM	Cell-Cell Contact	KEGG: hsa04514	GABAergic -> Oligodendrocyte (Hippo)	0.00989129	GABAergic -> Oligodendrocyte	Hippocampus
2954	Glutamatergic	Oligodendrocyte	JAM3	JAM3	0.289817	3	JAM3_JAM3	JAM3 - JAM3	JAM	Cell-Cell Contact	KEGG: hsa04514	Glutamatergic -> Oligodendrocyte (Hippo)	0.0317312	Glutamatergic -> Oligodendrocyte	Hippocampus
2955	Oligodendrocyte	Newly formed oligodendrocyte	JAM3	JAM3	0.224471	3	JAM3_JAM3	JAM3 - JAM3	JAM	Cell-Cell Contact	KEGG: hsa04514	Oligodendrocyte -> Newly formed oligodendrocyte (Hippo)	0.0116212	Oligodendrocyte -> Newly formed oligodendrocyte	Hippocampus
2956	Glutamatergic	Newly formed oligodendrocyte	JAM3	JAM3	0.199503	3	JAM3_JAM3	JAM3 - JAM3	JAM	Cell-Cell Contact	KEGG: hsa04514	Glutamatergic -> Newly formed oligodendrocyte (Hippo)	0.00665458	Glutamatergic -> Newly formed oligodendrocyte	Hippocampus
2957	Oligodendrocyte	Vascular leptomeningeal cell	JAM3	JAM3	0.230588	3	JAM3_JAM3	JAM3 - JAM3	JAM	Cell-Cell Contact	KEGG: hsa04514	Oligodendrocyte -> Vascular leptomeningeal cell (Hippo)	0.0130792	Oligodendrocyte -> Vascular leptomeningeal cell	Hippocampus
2958	Glutamatergic	Vascular leptomeningeal cell	JAM3	JAM3	0.204347	3	JAM3_JAM3	JAM3 - JAM3	JAM	Cell-Cell Contact	KEGG: hsa04514	Glutamatergic -> Vascular leptomeningeal cell (Hippo)	0.00749415	Glutamatergic -> Vascular leptomeningeal cell	Hippocampus
2959	Oligodendrocyte	GABAergic	JAM3	JAM3	0.216633	3	JAM3_JAM3	JAM3 - JAM3	JAM	Cell-Cell Contact	KEGG: hsa04514	Oligodendrocyte -> GABAergic (Hippo)	0.00989129	Oligodendrocyte -> GABAergic	Hippocampus
2960	Microglia (PCDH9high)	Glutamatergic	JAM3	JAM3	0.227363	3	JAM3_JAM3	JAM3 - JAM3	JAM	Cell-Cell Contact	KEGG: hsa04514	Microglia (PCDH9high) -> Glutamatergic (Hippo)	0.0122989	Microglia (PCDH9high) -> Glutamatergic	Hippocampus
2961	Oligodendrocyte precursor	Glutamatergic	JAM3	JAM3	0.200286	3	JAM3_JAM3	JAM3 - JAM3	JAM	Cell-Cell Contact	KEGG: hsa04514	Oligodendrocyte precursor -> Glutamatergic (Hippo)	0.00678625	Oligodendrocyte precursor -> Glutamatergic	Hippocampus
2962	Oligodendrocyte	Glutamatergic	JAM3	JAM3	0.289817	3	JAM3_JAM3	JAM3 - JAM3	JAM	Cell-Cell Contact	KEGG: hsa04514	Oligodendrocyte -> Glutamatergic (Hippo)	0.0317312	Oligodendrocyte -> Glutamatergic	Hippocampus
2963	Newly formed oligodendrocyte	Glutamatergic	JAM3	JAM3	0.199503	3	JAM3_JAM3	JAM3 - JAM3	JAM	Cell-Cell Contact	KEGG: hsa04514	Newly formed oligodendrocyte -> Glutamatergic (Hippo)	0.00665458	Newly formed oligodendrocyte -> Glutamatergic	Hippocampus
2964	Vascular leptomeningeal cell	Glutamatergic	JAM3	JAM3	0.204347	3	JAM3_JAM3	JAM3 - JAM3	JAM	Cell-Cell Contact	KEGG: hsa04514	Vascular leptomeningeal cell -> Glutamatergic (Hippo)	0.00749415	Vascular leptomeningeal cell -> Glutamatergic	Hippocampus
2965	Glutamatergic	Glutamatergic	JAM3	JAM3	0.250047	3	JAM3_JAM3	JAM3 - JAM3	JAM	Cell-Cell Contact	KEGG: hsa04514	Glutamatergic -> Glutamatergic (Hippo)	0.0183294	Glutamatergic -> Glutamatergic	Hippocampus
2011	Astrocyte	Vascular leptomeningeal cell	LAMA1	ITGA1_ITGB1	0.190483	3	LAMA1_ITGA1_ITGB1	LAMA1 - (ITGA1+ITGB1)	LAMININ	ECM-Receptor	KEGG: hsa04512	Astrocyte -> Vascular leptomeningeal cell (Hippo)	0.00524856	Astrocyte -> Vascular leptomeningeal cell	Hippocampus
2012	Astrocyte	Endothelial	LAMA1	ITGA1_ITGB1	0.228728	3	LAMA1_ITGA1_ITGB1	LAMA1 - (ITGA1+ITGB1)	LAMININ	ECM-Receptor	KEGG: hsa04512	Astrocyte -> Endothelial (Hippo)	0.0126259	Astrocyte -> Endothelial	Hippocampus
2051	Astrocyte	Endothelial	LAMA1	ITGA6_ITGB1	0.231601	3	LAMA1_ITGA6_ITGB1	LAMA1 - (ITGA6+ITGB1)	LAMININ	ECM-Receptor	KEGG: hsa04512	Astrocyte -> Endothelial (Hippo)	0.0133297	Astrocyte -> Endothelial	Hippocampus
2466	Astrocyte	Astrocyte	LAMA1	ITGA6_ITGB4	0.170272	3	LAMA1_ITGA6_ITGB4	LAMA1 - (ITGA6+ITGB4)	LAMININ	ECM-Receptor	KEGG: hsa04512	Astrocyte -> Astrocyte (Hippo)	0.00281456	Astrocyte -> Astrocyte	Hippocampus
2071	Astrocyte	Vascular leptomeningeal cell	LAMA1	ITGA7_ITGB1	0.181811	3	LAMA1_ITGA7_ITGB1	LAMA1 - (ITGA7+ITGB1)	LAMININ	ECM-Receptor	KEGG: hsa04512	Astrocyte -> Vascular leptomeningeal cell (Hippo)	0.00408586	Astrocyte -> Vascular leptomeningeal cell	Hippocampus
2072	Astrocyte	Glutamatergic	LAMA1	ITGA7_ITGB1	0.170688	3	LAMA1_ITGA7_ITGB1	LAMA1 - (ITGA7+ITGB1)	LAMININ	ECM-Receptor	KEGG: hsa04512	Astrocyte -> Glutamatergic (Hippo)	0.00285515	Astrocyte -> Glutamatergic	Hippocampus
2185	Astrocyte	GABAergic	LAMA1	ITGA9_ITGB1	0.150254	3	LAMA1_ITGA9_ITGB1	LAMA1 - (ITGA9+ITGB1)	LAMININ	ECM-Receptor	KEGG: hsa04512	Astrocyte -> GABAergic (Hippo)	0.00128704	Astrocyte -> GABAergic	Hippocampus
2186	Astrocyte	Glutamatergic	LAMA1	ITGA9_ITGB1	0.177695	3	LAMA1_ITGA9_ITGB1	LAMA1 - (ITGA9+ITGB1)	LAMININ	ECM-Receptor	KEGG: hsa04512	Astrocyte -> Glutamatergic (Hippo)	0.00359712	Astrocyte -> Glutamatergic	Hippocampus
2241	Astrocyte	Microglia (PCDH9high)	LAMA1	ITGAV_ITGB8	0.180422	3	LAMA1_ITGAV_ITGB8	LAMA1 - (ITGAV+ITGB8)	LAMININ	ECM-Receptor	KEGG: hsa04512	Astrocyte -> Microglia (PCDH9high) (Hippo)	0.00391643	Astrocyte -> Microglia (PCDH9high)	Hippocampus
2242	Astrocyte	Oligodendrocyte precursor	LAMA1	ITGAV_ITGB8	0.194753	3	LAMA1_ITGAV_ITGB8	LAMA1 - (ITGAV+ITGB8)	LAMININ	ECM-Receptor	KEGG: hsa04512	Astrocyte -> Oligodendrocyte precursor (Hippo)	0.00588876	Astrocyte -> Oligodendrocyte precursor	Hippocampus
2243	Astrocyte	Newly formed oligodendrocyte	LAMA1	ITGAV_ITGB8	0.168788	3	LAMA1_ITGAV_ITGB8	LAMA1 - (ITGAV+ITGB8)	LAMININ	ECM-Receptor	KEGG: hsa04512	Astrocyte -> Newly formed oligodendrocyte (Hippo)	0.00267292	Astrocyte -> Newly formed oligodendrocyte	Hippocampus
2244	Astrocyte	Astrocyte	LAMA1	ITGAV_ITGB8	0.180989	3	LAMA1_ITGAV_ITGB8	LAMA1 - (ITGAV+ITGB8)	LAMININ	ECM-Receptor	KEGG: hsa04512	Astrocyte -> Astrocyte (Hippo)	0.00398511	Astrocyte -> Astrocyte	Hippocampus
2245	Astrocyte	Glutamatergic	LAMA1	ITGAV_ITGB8	0.163586	3	LAMA1_ITGAV_ITGB8	LAMA1 - (ITGAV+ITGB8)	LAMININ	ECM-Receptor	KEGG: hsa04512	Astrocyte -> Glutamatergic (Hippo)	0.00221388	Astrocyte -> Glutamatergic	Hippocampus
2513	Astrocyte	Astrocyte	LAMA1	CD44	0.171718	3	LAMA1_CD44	LAMA1 - CD44	LAMININ	ECM-Receptor	KEGG: hsa04512	Astrocyte -> Astrocyte (Hippo)	0.00295725	Astrocyte -> Astrocyte	Hippocampus
2569	Astrocyte	GABAergic	LAMA1	SV2A	0.174063	3	LAMA1_SV2A	LAMA1 - SV2A	LAMININ	ECM-Receptor	KEGG: hsa04512	Astrocyte -> GABAergic (Hippo)	0.00319855	Astrocyte -> GABAergic	Hippocampus
2570	Astrocyte	Glutamatergic	LAMA1	SV2A	0.162911	3	LAMA1_SV2A	LAMA1 - SV2A	LAMININ	ECM-Receptor	KEGG: hsa04512	Astrocyte -> Glutamatergic (Hippo)	0.00215853	Astrocyte -> Glutamatergic	Hippocampus
2609	Astrocyte	Glutamatergic	LAMA1	SV2B	0.215928	3	LAMA1_SV2B	LAMA1 - SV2B	LAMININ	ECM-Receptor	KEGG: hsa04512	Astrocyte -> Glutamatergic (Hippo)	0.00974334	Astrocyte -> Glutamatergic	Hippocampus
456	Oligodendrocyte	Vascular leptomeningeal cell	LAMA2	ITGA1_ITGB1	0.208115	3	LAMA2_ITGA1_ITGB1	LAMA2 - (ITGA1+ITGB1)	LAMININ	ECM-Receptor	KEGG: hsa04512	Oligodendrocyte -> Vascular leptomeningeal cell (CC)	0.00818838	Oligodendrocyte -> Vascular leptomeningeal cell	Prefrontal cortex
457	Vascular leptomeningeal cell	Vascular leptomeningeal cell	LAMA2	ITGA1_ITGB1	0.325389	3	LAMA2_ITGA1_ITGB1	LAMA2 - (ITGA1+ITGB1)	LAMININ	ECM-Receptor	KEGG: hsa04512	Vascular leptomeningeal cell -> Vascular leptomeningeal cell (CC)	0.046271	Vascular leptomeningeal cell -> Vascular leptomeningeal cell	Prefrontal cortex
458	Fibroblast	Vascular leptomeningeal cell	LAMA2	ITGA1_ITGB1	0.356621	3	LAMA2_ITGA1_ITGB1	LAMA2 - (ITGA1+ITGB1)	LAMININ	ECM-Receptor	KEGG: hsa04512	Fibroblast -> Vascular leptomeningeal cell (CC)	0.0605615	Fibroblast -> Vascular leptomeningeal cell	Prefrontal cortex
459	Endothelial	Vascular leptomeningeal cell	LAMA2	ITGA1_ITGB1	0.21109	3	LAMA2_ITGA1_ITGB1	LAMA2 - (ITGA1+ITGB1)	LAMININ	ECM-Receptor	KEGG: hsa04512	Endothelial -> Vascular leptomeningeal cell (CC)	0.0087621	Endothelial -> Vascular leptomeningeal cell	Prefrontal cortex
460	Glutamatergic	Vascular leptomeningeal cell	LAMA2	ITGA1_ITGB1	0.170328	3	LAMA2_ITGA1_ITGB1	LAMA2 - (ITGA1+ITGB1)	LAMININ	ECM-Receptor	KEGG: hsa04512	Glutamatergic -> Vascular leptomeningeal cell (CC)	0.00281998	Glutamatergic -> Vascular leptomeningeal cell	Prefrontal cortex
461	Oligodendrocyte	Endothelial	LAMA2	ITGA1_ITGB1	0.258392	3	LAMA2_ITGA1_ITGB1	LAMA2 - (ITGA1+ITGB1)	LAMININ	ECM-Receptor	KEGG: hsa04512	Oligodendrocyte -> Endothelial (CC)	0.0208566	Oligodendrocyte -> Endothelial	Prefrontal cortex
462	Vascular leptomeningeal cell	Endothelial	LAMA2	ITGA1_ITGB1	0.455375	3	LAMA2_ITGA1_ITGB1	LAMA2 - (ITGA1+ITGB1)	LAMININ	ECM-Receptor	KEGG: hsa04512	Vascular leptomeningeal cell -> Endothelial (CC)	0.111248	Vascular leptomeningeal cell -> Endothelial	Prefrontal cortex
463	Fibroblast	Endothelial	LAMA2	ITGA1_ITGB1	0.513433	3	LAMA2_ITGA1_ITGB1	LAMA2 - (ITGA1+ITGB1)	LAMININ	ECM-Receptor	KEGG: hsa04512	Fibroblast -> Endothelial (CC)	0.142606	Fibroblast -> Endothelial	Prefrontal cortex
464	Endothelial	Endothelial	LAMA2	ITGA1_ITGB1	0.262932	3	LAMA2_ITGA1_ITGB1	LAMA2 - (ITGA1+ITGB1)	LAMININ	ECM-Receptor	KEGG: hsa04512	Endothelial -> Endothelial (CC)	0.0222979	Endothelial -> Endothelial	Prefrontal cortex
465	Glutamatergic	Endothelial	LAMA2	ITGA1_ITGB1	0.202936	3	LAMA2_ITGA1_ITGB1	LAMA2 - (ITGA1+ITGB1)	LAMININ	ECM-Receptor	KEGG: hsa04512	Glutamatergic -> Endothelial (CC)	0.00724341	Glutamatergic -> Endothelial	Prefrontal cortex
2013	Microglia (PCDH9high)	Vascular leptomeningeal cell	LAMA2	ITGA1_ITGB1	0.210233	3	LAMA2_ITGA1_ITGB1	LAMA2 - (ITGA1+ITGB1)	LAMININ	ECM-Receptor	KEGG: hsa04512	Microglia (PCDH9high) -> Vascular leptomeningeal cell (Hippo)	0.00859464	Microglia (PCDH9high) -> Vascular leptomeningeal cell	Hippocampus
2014	Oligodendrocyte	Vascular leptomeningeal cell	LAMA2	ITGA1_ITGB1	0.212238	3	LAMA2_ITGA1_ITGB1	LAMA2 - (ITGA1+ITGB1)	LAMININ	ECM-Receptor	KEGG: hsa04512	Oligodendrocyte -> Vascular leptomeningeal cell (Hippo)	0.0089896	Oligodendrocyte -> Vascular leptomeningeal cell	Hippocampus
2015	Vascular leptomeningeal cell	Vascular leptomeningeal cell	LAMA2	ITGA1_ITGB1	0.310723	3	LAMA2_ITGA1_ITGB1	LAMA2 - (ITGA1+ITGB1)	LAMININ	ECM-Receptor	KEGG: hsa04512	Vascular leptomeningeal cell -> Vascular leptomeningeal cell (Hippo)	0.040023	Vascular leptomeningeal cell -> Vascular leptomeningeal cell	Hippocampus
2016	Fibroblast	Vascular leptomeningeal cell	LAMA2	ITGA1_ITGB1	0.376338	3	LAMA2_ITGA1_ITGB1	LAMA2 - (ITGA1+ITGB1)	LAMININ	ECM-Receptor	KEGG: hsa04512	Fibroblast -> Vascular leptomeningeal cell (Hippo)	0.0701451	Fibroblast -> Vascular leptomeningeal cell	Hippocampus
2017	Endothelial	Vascular leptomeningeal cell	LAMA2	ITGA1_ITGB1	0.214048	3	LAMA2_ITGA1_ITGB1	LAMA2 - (ITGA1+ITGB1)	LAMININ	ECM-Receptor	KEGG: hsa04512	Endothelial -> Vascular leptomeningeal cell (Hippo)	0.00935501	Endothelial -> Vascular leptomeningeal cell	Hippocampus
2018	Microglia (PCDH9high)	Endothelial	LAMA2	ITGA1_ITGB1	0.257497	3	LAMA2_ITGA1_ITGB1	LAMA2 - (ITGA1+ITGB1)	LAMININ	ECM-Receptor	KEGG: hsa04512	Microglia (PCDH9high) -> Endothelial (Hippo)	0.0205779	Microglia (PCDH9high) -> Endothelial	Hippocampus
2019	Oligodendrocyte	Endothelial	LAMA2	ITGA1_ITGB1	0.260473	3	LAMA2_ITGA1_ITGB1	LAMA2 - (ITGA1+ITGB1)	LAMININ	ECM-Receptor	KEGG: hsa04512	Oligodendrocyte -> Endothelial (Hippo)	0.0215116	Oligodendrocyte -> Endothelial	Hippocampus
2020	Vascular leptomeningeal cell	Endothelial	LAMA2	ITGA1_ITGB1	0.418677	3	LAMA2_ITGA1_ITGB1	LAMA2 - (ITGA1+ITGB1)	LAMININ	ECM-Receptor	KEGG: hsa04512	Vascular leptomeningeal cell -> Endothelial (Hippo)	0.0917696	Vascular leptomeningeal cell -> Endothelial	Hippocampus
2021	Fibroblast	Endothelial	LAMA2	ITGA1_ITGB1	0.535581	3	LAMA2_ITGA1_ITGB1	LAMA2 - (ITGA1+ITGB1)	LAMININ	ECM-Receptor	KEGG: hsa04512	Fibroblast -> Endothelial (Hippo)	0.154567	Fibroblast -> Endothelial	Hippocampus
2022	Endothelial	Endothelial	LAMA2	ITGA1_ITGB1	0.263169	3	LAMA2_ITGA1_ITGB1	LAMA2 - (ITGA1+ITGB1)	LAMININ	ECM-Receptor	KEGG: hsa04512	Endothelial -> Endothelial (Hippo)	0.0223745	Endothelial -> Endothelial	Hippocampus
492	Oligodendrocyte	Endothelial	LAMA2	ITGA6_ITGB1	0.252429	3	LAMA2_ITGA6_ITGB1	LAMA2 - (ITGA6+ITGB1)	LAMININ	ECM-Receptor	KEGG: hsa04512	Oligodendrocyte -> Endothelial (CC)	0.0190343	Oligodendrocyte -> Endothelial	Prefrontal cortex
493	Vascular leptomeningeal cell	Endothelial	LAMA2	ITGA6_ITGB1	0.438727	3	LAMA2_ITGA6_ITGB1	LAMA2 - (ITGA6+ITGB1)	LAMININ	ECM-Receptor	KEGG: hsa04512	Vascular leptomeningeal cell -> Endothelial (CC)	0.102354	Vascular leptomeningeal cell -> Endothelial	Prefrontal cortex
494	Fibroblast	Endothelial	LAMA2	ITGA6_ITGB1	0.493054	3	LAMA2_ITGA6_ITGB1	LAMA2 - (ITGA6+ITGB1)	LAMININ	ECM-Receptor	KEGG: hsa04512	Fibroblast -> Endothelial (CC)	0.131575	Fibroblast -> Endothelial	Prefrontal cortex
495	Endothelial	Endothelial	LAMA2	ITGA6_ITGB1	0.256768	3	LAMA2_ITGA6_ITGB1	LAMA2 - (ITGA6+ITGB1)	LAMININ	ECM-Receptor	KEGG: hsa04512	Endothelial -> Endothelial (CC)	0.0203523	Endothelial -> Endothelial	Prefrontal cortex
496	Glutamatergic	Endothelial	LAMA2	ITGA6_ITGB1	0.199191	3	LAMA2_ITGA6_ITGB1	LAMA2 - (ITGA6+ITGB1)	LAMININ	ECM-Receptor	KEGG: hsa04512	Glutamatergic -> Endothelial (CC)	0.00660251	Glutamatergic -> Endothelial	Prefrontal cortex
2052	Microglia (PCDH9high)	Endothelial	LAMA2	ITGA6_ITGB1	0.261114	3	LAMA2_ITGA6_ITGB1	LAMA2 - (ITGA6+ITGB1)	LAMININ	ECM-Receptor	KEGG: hsa04512	Microglia (PCDH9high) -> Endothelial (Hippo)	0.0217152	Microglia (PCDH9high) -> Endothelial	Hippocampus
2053	Oligodendrocyte	Endothelial	LAMA2	ITGA6_ITGB1	0.264171	3	LAMA2_ITGA6_ITGB1	LAMA2 - (ITGA6+ITGB1)	LAMININ	ECM-Receptor	KEGG: hsa04512	Oligodendrocyte -> Endothelial (Hippo)	0.0226993	Oligodendrocyte -> Endothelial	Hippocampus
2054	Vascular leptomeningeal cell	Endothelial	LAMA2	ITGA6_ITGB1	0.42759	3	LAMA2_ITGA6_ITGB1	LAMA2 - (ITGA6+ITGB1)	LAMININ	ECM-Receptor	KEGG: hsa04512	Vascular leptomeningeal cell -> Endothelial (Hippo)	0.0964542	Vascular leptomeningeal cell -> Endothelial	Hippocampus
2055	Fibroblast	Endothelial	LAMA2	ITGA6_ITGB1	0.549189	3	LAMA2_ITGA6_ITGB1	LAMA2 - (ITGA6+ITGB1)	LAMININ	ECM-Receptor	KEGG: hsa04512	Fibroblast -> Endothelial (Hippo)	0.161886	Fibroblast -> Endothelial	Hippocampus
2056	Endothelial	Endothelial	LAMA2	ITGA6_ITGB1	0.266941	3	LAMA2_ITGA6_ITGB1	LAMA2 - (ITGA6+ITGB1)	LAMININ	ECM-Receptor	KEGG: hsa04512	Endothelial -> Endothelial (Hippo)	0.0236087	Endothelial -> Endothelial	Hippocampus
685	Oligodendrocyte	Astrocyte	LAMA2	ITGA6_ITGB4	0.192316	3	LAMA2_ITGA6_ITGB4	LAMA2 - (ITGA6+ITGB4)	LAMININ	ECM-Receptor	KEGG: hsa04512	Oligodendrocyte -> Astrocyte (CC)	0.0055178	Oligodendrocyte -> Astrocyte	Prefrontal cortex
686	Vascular leptomeningeal cell	Astrocyte	LAMA2	ITGA6_ITGB4	0.289404	3	LAMA2_ITGA6_ITGB4	LAMA2 - (ITGA6+ITGB4)	LAMININ	ECM-Receptor	KEGG: hsa04512	Vascular leptomeningeal cell -> Astrocyte (CC)	0.0315755	Vascular leptomeningeal cell -> Astrocyte	Prefrontal cortex
687	Fibroblast	Astrocyte	LAMA2	ITGA6_ITGB4	0.314321	3	LAMA2_ITGA6_ITGB4	LAMA2 - (ITGA6+ITGB4)	LAMININ	ECM-Receptor	KEGG: hsa04512	Fibroblast -> Astrocyte (CC)	0.0415249	Fibroblast -> Astrocyte	Prefrontal cortex
688	Endothelial	Astrocyte	LAMA2	ITGA6_ITGB4	0.194861	3	LAMA2_ITGA6_ITGB4	LAMA2 - (ITGA6+ITGB4)	LAMININ	ECM-Receptor	KEGG: hsa04512	Endothelial -> Astrocyte (CC)	0.00590552	Endothelial -> Astrocyte	Prefrontal cortex
689	Glutamatergic	Astrocyte	LAMA2	ITGA6_ITGB4	0.159553	3	LAMA2_ITGA6_ITGB4	LAMA2 - (ITGA6+ITGB4)	LAMININ	ECM-Receptor	KEGG: hsa04512	Glutamatergic -> Astrocyte (CC)	0.00189692	Glutamatergic -> Astrocyte	Prefrontal cortex
2467	Microglia (PCDH9high)	Astrocyte	LAMA2	ITGA6_ITGB4	0.185936	3	LAMA2_ITGA6_ITGB4	LAMA2 - (ITGA6+ITGB4)	LAMININ	ECM-Receptor	KEGG: hsa04512	Microglia (PCDH9high) -> Astrocyte (Hippo)	0.0046161	Microglia (PCDH9high) -> Astrocyte	Hippocampus
2468	Oligodendrocyte	Astrocyte	LAMA2	ITGA6_ITGB4	0.187509	3	LAMA2_ITGA6_ITGB4	LAMA2 - (ITGA6+ITGB4)	LAMININ	ECM-Receptor	KEGG: hsa04512	Oligodendrocyte -> Astrocyte (Hippo)	0.00482913	Oligodendrocyte -> Astrocyte	Hippocampus
2469	Vascular leptomeningeal cell	Astrocyte	LAMA2	ITGA6_ITGB4	0.261431	3	LAMA2_ITGA6_ITGB4	LAMA2 - (ITGA6+ITGB4)	LAMININ	ECM-Receptor	KEGG: hsa04512	Vascular leptomeningeal cell -> Astrocyte (Hippo)	0.0218161	Vascular leptomeningeal cell -> Astrocyte	Hippocampus
2470	Fibroblast	Astrocyte	LAMA2	ITGA6_ITGB4	0.307729	3	LAMA2_ITGA6_ITGB4	LAMA2 - (ITGA6+ITGB4)	LAMININ	ECM-Receptor	KEGG: hsa04512	Fibroblast -> Astrocyte (Hippo)	0.0387891	Fibroblast -> Astrocyte	Hippocampus
2471	Endothelial	Astrocyte	LAMA2	ITGA6_ITGB4	0.188926	3	LAMA2_ITGA6_ITGB4	LAMA2 - (ITGA6+ITGB4)	LAMININ	ECM-Receptor	KEGG: hsa04512	Endothelial -> Astrocyte (Hippo)	0.00502627	Endothelial -> Astrocyte	Hippocampus
510	Oligodendrocyte	Vascular leptomeningeal cell	LAMA2	ITGA7_ITGB1	0.199951	3	LAMA2_ITGA7_ITGB1	LAMA2 - (ITGA7+ITGB1)	LAMININ	ECM-Receptor	KEGG: hsa04512	Oligodendrocyte -> Vascular leptomeningeal cell (CC)	0.00672965	Oligodendrocyte -> Vascular leptomeningeal cell	Prefrontal cortex
511	Vascular leptomeningeal cell	Vascular leptomeningeal cell	LAMA2	ITGA7_ITGB1	0.306507	3	LAMA2_ITGA7_ITGB1	LAMA2 - (ITGA7+ITGB1)	LAMININ	ECM-Receptor	KEGG: hsa04512	Vascular leptomeningeal cell -> Vascular leptomeningeal cell (CC)	0.0382899	Vascular leptomeningeal cell -> Vascular leptomeningeal cell	Prefrontal cortex
512	Fibroblast	Vascular leptomeningeal cell	LAMA2	ITGA7_ITGB1	0.334354	3	LAMA2_ITGA7_ITGB1	LAMA2 - (ITGA7+ITGB1)	LAMININ	ECM-Receptor	KEGG: hsa04512	Fibroblast -> Vascular leptomeningeal cell (CC)	0.0502453	Fibroblast -> Vascular leptomeningeal cell	Prefrontal cortex
513	Endothelial	Vascular leptomeningeal cell	LAMA2	ITGA7_ITGB1	0.2027	3	LAMA2_ITGA7_ITGB1	LAMA2 - (ITGA7+ITGB1)	LAMININ	ECM-Receptor	KEGG: hsa04512	Endothelial -> Vascular leptomeningeal cell (CC)	0.0072019	Endothelial -> Vascular leptomeningeal cell	Prefrontal cortex
514	Glutamatergic	Vascular leptomeningeal cell	LAMA2	ITGA7_ITGB1	0.164794	3	LAMA2_ITGA7_ITGB1	LAMA2 - (ITGA7+ITGB1)	LAMININ	ECM-Receptor	KEGG: hsa04512	Glutamatergic -> Vascular leptomeningeal cell (CC)	0.00231538	Glutamatergic -> Vascular leptomeningeal cell	Prefrontal cortex
2073	Microglia (PCDH9high)	Vascular leptomeningeal cell	LAMA2	ITGA7_ITGB1	0.199749	3	LAMA2_ITGA7_ITGB1	LAMA2 - (ITGA7+ITGB1)	LAMININ	ECM-Receptor	KEGG: hsa04512	Microglia (PCDH9high) -> Vascular leptomeningeal cell (Hippo)	0.00669568	Microglia (PCDH9high) -> Vascular leptomeningeal cell	Hippocampus
2074	Oligodendrocyte	Vascular leptomeningeal cell	LAMA2	ITGA7_ITGB1	0.201561	3	LAMA2_ITGA7_ITGB1	LAMA2 - (ITGA7+ITGB1)	LAMININ	ECM-Receptor	KEGG: hsa04512	Oligodendrocyte -> Vascular leptomeningeal cell (Hippo)	0.00700399	Oligodendrocyte -> Vascular leptomeningeal cell	Hippocampus
2075	Vascular leptomeningeal cell	Vascular leptomeningeal cell	LAMA2	ITGA7_ITGB1	0.288938	3	LAMA2_ITGA7_ITGB1	LAMA2 - (ITGA7+ITGB1)	LAMININ	ECM-Receptor	KEGG: hsa04512	Vascular leptomeningeal cell -> Vascular leptomeningeal cell (Hippo)	0.0314	Vascular leptomeningeal cell -> Vascular leptomeningeal cell	Hippocampus
2076	Fibroblast	Vascular leptomeningeal cell	LAMA2	ITGA7_ITGB1	0.345656	3	LAMA2_ITGA7_ITGB1	LAMA2 - (ITGA7+ITGB1)	LAMININ	ECM-Receptor	KEGG: hsa04512	Fibroblast -> Vascular leptomeningeal cell (Hippo)	0.0554068	Fibroblast -> Vascular leptomeningeal cell	Hippocampus
2077	Endothelial	Vascular leptomeningeal cell	LAMA2	ITGA7_ITGB1	0.203196	3	LAMA2_ITGA7_ITGB1	LAMA2 - (ITGA7+ITGB1)	LAMININ	ECM-Receptor	KEGG: hsa04512	Endothelial -> Vascular leptomeningeal cell (Hippo)	0.00728927	Endothelial -> Vascular leptomeningeal cell	Hippocampus
2078	Microglia (PCDH9high)	Glutamatergic	LAMA2	ITGA7_ITGB1	0.186431	3	LAMA2_ITGA7_ITGB1	LAMA2 - (ITGA7+ITGB1)	LAMININ	ECM-Receptor	KEGG: hsa04512	Microglia (PCDH9high) -> Glutamatergic (Hippo)	0.00468256	Microglia (PCDH9high) -> Glutamatergic	Hippocampus
2079	Oligodendrocyte	Glutamatergic	LAMA2	ITGA7_ITGB1	0.188012	3	LAMA2_ITGA7_ITGB1	LAMA2 - (ITGA7+ITGB1)	LAMININ	ECM-Receptor	KEGG: hsa04512	Oligodendrocyte -> Glutamatergic (Hippo)	0.00489863	Oligodendrocyte -> Glutamatergic	Hippocampus
2080	Vascular leptomeningeal cell	Glutamatergic	LAMA2	ITGA7_ITGB1	0.262394	3	LAMA2_ITGA7_ITGB1	LAMA2 - (ITGA7+ITGB1)	LAMININ	ECM-Receptor	KEGG: hsa04512	Vascular leptomeningeal cell -> Glutamatergic (Hippo)	0.0221247	Vascular leptomeningeal cell -> Glutamatergic	Hippocampus
2081	Fibroblast	Glutamatergic	LAMA2	ITGA7_ITGB1	0.309041	3	LAMA2_ITGA7_ITGB1	LAMA2 - (ITGA7+ITGB1)	LAMININ	ECM-Receptor	KEGG: hsa04512	Fibroblast -> Glutamatergic (Hippo)	0.0393281	Fibroblast -> Glutamatergic	Hippocampus
2082	Endothelial	Glutamatergic	LAMA2	ITGA7_ITGB1	0.189437	3	LAMA2_ITGA7_ITGB1	LAMA2 - (ITGA7+ITGB1)	LAMININ	ECM-Receptor	KEGG: hsa04512	Endothelial -> Glutamatergic (Hippo)	0.0050986	Endothelial -> Glutamatergic	Hippocampus
2187	Microglia (PCDH9high)	GABAergic	LAMA2	ITGA9_ITGB1	0.162346	3	LAMA2_ITGA9_ITGB1	LAMA2 - (ITGA9+ITGB1)	LAMININ	ECM-Receptor	KEGG: hsa04512	Microglia (PCDH9high) -> GABAergic (Hippo)	0.00211293	Microglia (PCDH9high) -> GABAergic	Hippocampus
2188	Oligodendrocyte	GABAergic	LAMA2	ITGA9_ITGB1	0.163547	3	LAMA2_ITGA9_ITGB1	LAMA2 - (ITGA9+ITGB1)	LAMININ	ECM-Receptor	KEGG: hsa04512	Oligodendrocyte -> GABAergic (Hippo)	0.00221069	Oligodendrocyte -> GABAergic	Hippocampus
2189	Vascular leptomeningeal cell	GABAergic	LAMA2	ITGA9_ITGB1	0.217525	3	LAMA2_ITGA9_ITGB1	LAMA2 - (ITGA9+ITGB1)	LAMININ	ECM-Receptor	KEGG: hsa04512	Vascular leptomeningeal cell -> GABAergic (Hippo)	0.0100803	Vascular leptomeningeal cell -> GABAergic	Hippocampus
2190	Fibroblast	GABAergic	LAMA2	ITGA9_ITGB1	0.249234	3	LAMA2_ITGA9_ITGB1	LAMA2 - (ITGA9+ITGB1)	LAMININ	ECM-Receptor	KEGG: hsa04512	Fibroblast -> GABAergic (Hippo)	0.0180917	Fibroblast -> GABAergic	Hippocampus
2191	Endothelial	GABAergic	LAMA2	ITGA9_ITGB1	0.164627	3	LAMA2_ITGA9_ITGB1	LAMA2 - (ITGA9+ITGB1)	LAMININ	ECM-Receptor	KEGG: hsa04512	Endothelial -> GABAergic (Hippo)	0.00230119	Endothelial -> GABAergic	Hippocampus
2192	Microglia (PCDH9high)	Glutamatergic	LAMA2	ITGA9_ITGB1	0.194804	3	LAMA2_ITGA9_ITGB1	LAMA2 - (ITGA9+ITGB1)	LAMININ	ECM-Receptor	KEGG: hsa04512	Microglia (PCDH9high) -> Glutamatergic (Hippo)	0.00589661	Microglia (PCDH9high) -> Glutamatergic	Hippocampus
2193	Oligodendrocyte	Glutamatergic	LAMA2	ITGA9_ITGB1	0.196528	3	LAMA2_ITGA9_ITGB1	LAMA2 - (ITGA9+ITGB1)	LAMININ	ECM-Receptor	KEGG: hsa04512	Oligodendrocyte -> Glutamatergic (Hippo)	0.00616835	Oligodendrocyte -> Glutamatergic	Hippocampus
2194	Vascular leptomeningeal cell	Glutamatergic	LAMA2	ITGA9_ITGB1	0.278935	3	LAMA2_ITGA9_ITGB1	LAMA2 - (ITGA9+ITGB1)	LAMININ	ECM-Receptor	KEGG: hsa04512	Vascular leptomeningeal cell -> Glutamatergic (Hippo)	0.027735	Vascular leptomeningeal cell -> Glutamatergic	Hippocampus
2195	Fibroblast	Glutamatergic	LAMA2	ITGA9_ITGB1	0.331755	3	LAMA2_ITGA9_ITGB1	LAMA2 - (ITGA9+ITGB1)	LAMININ	ECM-Receptor	KEGG: hsa04512	Fibroblast -> Glutamatergic (Hippo)	0.0490817	Fibroblast -> Glutamatergic	Hippocampus
2196	Endothelial	Glutamatergic	LAMA2	ITGA9_ITGB1	0.198084	3	LAMA2_ITGA9_ITGB1	LAMA2 - (ITGA9+ITGB1)	LAMININ	ECM-Receptor	KEGG: hsa04512	Endothelial -> Glutamatergic (Hippo)	0.00641982	Endothelial -> Glutamatergic	Hippocampus
565	Oligodendrocyte	Oligodendrocyte precursor	LAMA2	ITGAV_ITGB8	0.218786	3	LAMA2_ITGAV_ITGB8	LAMA2 - (ITGAV+ITGB8)	LAMININ	ECM-Receptor	KEGG: hsa04512	Oligodendrocyte -> Oligodendrocyte precursor (CC)	0.010351	Oligodendrocyte -> Oligodendrocyte precursor	Prefrontal cortex
566	Vascular leptomeningeal cell	Oligodendrocyte precursor	LAMA2	ITGAV_ITGB8	0.351005	3	LAMA2_ITGAV_ITGB8	LAMA2 - (ITGAV+ITGB8)	LAMININ	ECM-Receptor	KEGG: hsa04512	Vascular leptomeningeal cell -> Oligodendrocyte precursor (CC)	0.0579046	Vascular leptomeningeal cell -> Oligodendrocyte precursor	Prefrontal cortex
567	Fibroblast	Oligodendrocyte precursor	LAMA2	ITGAV_ITGB8	0.387061	3	LAMA2_ITGAV_ITGB8	LAMA2 - (ITGAV+ITGB8)	LAMININ	ECM-Receptor	KEGG: hsa04512	Fibroblast -> Oligodendrocyte precursor (CC)	0.0755036	Fibroblast -> Oligodendrocyte precursor	Prefrontal cortex
568	Endothelial	Oligodendrocyte precursor	LAMA2	ITGAV_ITGB8	0.222069	3	LAMA2_ITGAV_ITGB8	LAMA2 - (ITGAV+ITGB8)	LAMININ	ECM-Receptor	KEGG: hsa04512	Endothelial -> Oligodendrocyte precursor (CC)	0.0110746	Endothelial -> Oligodendrocyte precursor	Prefrontal cortex
569	Glutamatergic	Oligodendrocyte precursor	LAMA2	ITGAV_ITGB8	0.177455	3	LAMA2_ITGAV_ITGB8	LAMA2 - (ITGAV+ITGB8)	LAMININ	ECM-Receptor	KEGG: hsa04512	Glutamatergic -> Oligodendrocyte precursor (CC)	0.00356988	Glutamatergic -> Oligodendrocyte precursor	Prefrontal cortex
570	Oligodendrocyte	Newly formed oligodendrocyte	LAMA2	ITGAV_ITGB8	0.187298	3	LAMA2_ITGAV_ITGB8	LAMA2 - (ITGAV+ITGB8)	LAMININ	ECM-Receptor	KEGG: hsa04512	Oligodendrocyte -> Newly formed oligodendrocyte (CC)	0.00480023	Oligodendrocyte -> Newly formed oligodendrocyte	Prefrontal cortex
571	Vascular leptomeningeal cell	Newly formed oligodendrocyte	LAMA2	ITGAV_ITGB8	0.278453	3	LAMA2_ITGAV_ITGB8	LAMA2 - (ITGAV+ITGB8)	LAMININ	ECM-Receptor	KEGG: hsa04512	Vascular leptomeningeal cell -> Newly formed oligodendrocyte (CC)	0.0275631	Vascular leptomeningeal cell -> Newly formed oligodendrocyte	Prefrontal cortex
572	Fibroblast	Newly formed oligodendrocyte	LAMA2	ITGAV_ITGB8	0.301563	3	LAMA2_ITGAV_ITGB8	LAMA2 - (ITGAV+ITGB8)	LAMININ	ECM-Receptor	KEGG: hsa04512	Fibroblast -> Newly formed oligodendrocyte (CC)	0.0362957	Fibroblast -> Newly formed oligodendrocyte	Prefrontal cortex
573	Endothelial	Newly formed oligodendrocyte	LAMA2	ITGAV_ITGB8	0.189713	3	LAMA2_ITGAV_ITGB8	LAMA2 - (ITGAV+ITGB8)	LAMININ	ECM-Receptor	KEGG: hsa04512	Endothelial -> Newly formed oligodendrocyte (CC)	0.00513779	Endothelial -> Newly formed oligodendrocyte	Prefrontal cortex
574	Glutamatergic	Newly formed oligodendrocyte	LAMA2	ITGAV_ITGB8	0.156072	3	LAMA2_ITGAV_ITGB8	LAMA2 - (ITGAV+ITGB8)	LAMININ	ECM-Receptor	KEGG: hsa04512	Glutamatergic -> Newly formed oligodendrocyte (CC)	0.00164945	Glutamatergic -> Newly formed oligodendrocyte	Prefrontal cortex
575	Oligodendrocyte	Astrocyte	LAMA2	ITGAV_ITGB8	0.203719	3	LAMA2_ITGAV_ITGB8	LAMA2 - (ITGAV+ITGB8)	LAMININ	ECM-Receptor	KEGG: hsa04512	Oligodendrocyte -> Astrocyte (CC)	0.00738192	Oligodendrocyte -> Astrocyte	Prefrontal cortex
576	Vascular leptomeningeal cell	Astrocyte	LAMA2	ITGAV_ITGB8	0.315146	3	LAMA2_ITGAV_ITGB8	LAMA2 - (ITGAV+ITGB8)	LAMININ	ECM-Receptor	KEGG: hsa04512	Vascular leptomeningeal cell -> Astrocyte (CC)	0.0418722	Vascular leptomeningeal cell -> Astrocyte	Prefrontal cortex
577	Fibroblast	Astrocyte	LAMA2	ITGAV_ITGB8	0.344523	3	LAMA2_ITGAV_ITGB8	LAMA2 - (ITGAV+ITGB8)	LAMININ	ECM-Receptor	KEGG: hsa04512	Fibroblast -> Astrocyte (CC)	0.0548823	Fibroblast -> Astrocyte	Prefrontal cortex
578	Endothelial	Astrocyte	LAMA2	ITGAV_ITGB8	0.206571	3	LAMA2_ITGAV_ITGB8	LAMA2 - (ITGAV+ITGB8)	LAMININ	ECM-Receptor	KEGG: hsa04512	Endothelial -> Astrocyte (CC)	0.00789958	Endothelial -> Astrocyte	Prefrontal cortex
579	Glutamatergic	Astrocyte	LAMA2	ITGAV_ITGB8	0.167357	3	LAMA2_ITGAV_ITGB8	LAMA2 - (ITGAV+ITGB8)	LAMININ	ECM-Receptor	KEGG: hsa04512	Glutamatergic -> Astrocyte (CC)	0.00254089	Glutamatergic -> Astrocyte	Prefrontal cortex
2246	Microglia (PCDH9high)	Microglia (PCDH9high)	LAMA2	ITGAV_ITGB8	0.198077	3	LAMA2_ITGAV_ITGB8	LAMA2 - (ITGAV+ITGB8)	LAMININ	ECM-Receptor	KEGG: hsa04512	Microglia (PCDH9high) -> Microglia (PCDH9high) (Hippo)	0.00641872	Microglia (PCDH9high) -> Microglia (PCDH9high)	Hippocampus
2247	Oligodendrocyte	Microglia (PCDH9high)	LAMA2	ITGAV_ITGB8	0.19986	3	LAMA2_ITGAV_ITGB8	LAMA2 - (ITGAV+ITGB8)	LAMININ	ECM-Receptor	KEGG: hsa04512	Oligodendrocyte -> Microglia (PCDH9high) (Hippo)	0.00671437	Oligodendrocyte -> Microglia (PCDH9high)	Hippocampus
2248	Vascular leptomeningeal cell	Microglia (PCDH9high)	LAMA2	ITGAV_ITGB8	0.285538	3	LAMA2_ITGAV_ITGB8	LAMA2 - (ITGAV+ITGB8)	LAMININ	ECM-Receptor	KEGG: hsa04512	Vascular leptomeningeal cell -> Microglia (PCDH9high) (Hippo)	0.0301321	Vascular leptomeningeal cell -> Microglia (PCDH9high)	Hippocampus
2249	Fibroblast	Microglia (PCDH9high)	LAMA2	ITGAV_ITGB8	0.340917	3	LAMA2_ITGAV_ITGB8	LAMA2 - (ITGAV+ITGB8)	LAMININ	ECM-Receptor	KEGG: hsa04512	Fibroblast -> Microglia (PCDH9high) (Hippo)	0.0532229	Fibroblast -> Microglia (PCDH9high)	Hippocampus
2250	Endothelial	Microglia (PCDH9high)	LAMA2	ITGAV_ITGB8	0.201468	3	LAMA2_ITGAV_ITGB8	LAMA2 - (ITGAV+ITGB8)	LAMININ	ECM-Receptor	KEGG: hsa04512	Endothelial -> Microglia (PCDH9high) (Hippo)	0.00698794	Endothelial -> Microglia (PCDH9high)	Hippocampus
2251	Microglia (PCDH9high)	Oligodendrocyte precursor	LAMA2	ITGAV_ITGB8	0.215427	3	LAMA2_ITGAV_ITGB8	LAMA2 - (ITGAV+ITGB8)	LAMININ	ECM-Receptor	KEGG: hsa04512	Microglia (PCDH9high) -> Oligodendrocyte precursor (Hippo)	0.00963902	Microglia (PCDH9high) -> Oligodendrocyte precursor	Hippocampus
2252	Oligodendrocyte	Oligodendrocyte precursor	LAMA2	ITGAV_ITGB8	0.217531	3	LAMA2_ITGAV_ITGB8	LAMA2 - (ITGAV+ITGB8)	LAMININ	ECM-Receptor	KEGG: hsa04512	Oligodendrocyte -> Oligodendrocyte precursor (Hippo)	0.0100815	Oligodendrocyte -> Oligodendrocyte precursor	Hippocampus
2253	Vascular leptomeningeal cell	Oligodendrocyte precursor	LAMA2	ITGAV_ITGB8	0.321806	3	LAMA2_ITGAV_ITGB8	LAMA2 - (ITGAV+ITGB8)	LAMININ	ECM-Receptor	KEGG: hsa04512	Vascular leptomeningeal cell -> Oligodendrocyte precursor (Hippo)	0.0447142	Vascular leptomeningeal cell -> Oligodendrocyte precursor	Hippocampus
2254	Fibroblast	Oligodendrocyte precursor	LAMA2	ITGAV_ITGB8	0.392153	3	LAMA2_ITGAV_ITGB8	LAMA2 - (ITGAV+ITGB8)	LAMININ	ECM-Receptor	KEGG: hsa04512	Fibroblast -> Oligodendrocyte precursor (Hippo)	0.0780798	Fibroblast -> Oligodendrocyte precursor	Hippocampus
2255	Endothelial	Oligodendrocyte precursor	LAMA2	ITGAV_ITGB8	0.21943	3	LAMA2_ITGAV_ITGB8	LAMA2 - (ITGAV+ITGB8)	LAMININ	ECM-Receptor	KEGG: hsa04512	Endothelial -> Oligodendrocyte precursor (Hippo)	0.0104908	Endothelial -> Oligodendrocyte precursor	Hippocampus
2256	Microglia (PCDH9high)	Newly formed oligodendrocyte	LAMA2	ITGAV_ITGB8	0.184171	3	LAMA2_ITGAV_ITGB8	LAMA2 - (ITGAV+ITGB8)	LAMININ	ECM-Receptor	KEGG: hsa04512	Microglia (PCDH9high) -> Newly formed oligodendrocyte (Hippo)	0.0043842	Microglia (PCDH9high) -> Newly formed oligodendrocyte	Hippocampus
2257	Oligodendrocyte	Newly formed oligodendrocyte	LAMA2	ITGAV_ITGB8	0.185714	3	LAMA2_ITGAV_ITGB8	LAMA2 - (ITGAV+ITGB8)	LAMININ	ECM-Receptor	KEGG: hsa04512	Oligodendrocyte -> Newly formed oligodendrocyte (Hippo)	0.00458657	Oligodendrocyte -> Newly formed oligodendrocyte	Hippocampus
2258	Vascular leptomeningeal cell	Newly formed oligodendrocyte	LAMA2	ITGAV_ITGB8	0.258013	3	LAMA2_ITGAV_ITGB8	LAMA2 - (ITGAV+ITGB8)	LAMININ	ECM-Receptor	KEGG: hsa04512	Vascular leptomeningeal cell -> Newly formed oligodendrocyte (Hippo)	0.0207381	Vascular leptomeningeal cell -> Newly formed oligodendrocyte	Hippocampus
2259	Fibroblast	Newly formed oligodendrocyte	LAMA2	ITGAV_ITGB8	0.303082	3	LAMA2_ITGAV_ITGB8	LAMA2 - (ITGAV+ITGB8)	LAMININ	ECM-Receptor	KEGG: hsa04512	Fibroblast -> Newly formed oligodendrocyte (Hippo)	0.036904	Fibroblast -> Newly formed oligodendrocyte	Hippocampus
2260	Endothelial	Newly formed oligodendrocyte	LAMA2	ITGAV_ITGB8	0.187105	3	LAMA2_ITGAV_ITGB8	LAMA2 - (ITGAV+ITGB8)	LAMININ	ECM-Receptor	KEGG: hsa04512	Endothelial -> Newly formed oligodendrocyte (Hippo)	0.00477386	Endothelial -> Newly formed oligodendrocyte	Hippocampus
2261	Microglia (PCDH9high)	Astrocyte	LAMA2	ITGAV_ITGB8	0.19876	3	LAMA2_ITGAV_ITGB8	LAMA2 - (ITGAV+ITGB8)	LAMININ	ECM-Receptor	KEGG: hsa04512	Microglia (PCDH9high) -> Astrocyte (Hippo)	0.00653101	Microglia (PCDH9high) -> Astrocyte	Hippocampus
2262	Oligodendrocyte	Astrocyte	LAMA2	ITGAV_ITGB8	0.200555	3	LAMA2_ITGAV_ITGB8	LAMA2 - (ITGAV+ITGB8)	LAMININ	ECM-Receptor	KEGG: hsa04512	Oligodendrocyte -> Astrocyte (Hippo)	0.00683178	Oligodendrocyte -> Astrocyte	Hippocampus
2263	Vascular leptomeningeal cell	Astrocyte	LAMA2	ITGAV_ITGB8	0.286924	3	LAMA2_ITGAV_ITGB8	LAMA2 - (ITGAV+ITGB8)	LAMININ	ECM-Receptor	KEGG: hsa04512	Vascular leptomeningeal cell -> Astrocyte (Hippo)	0.0306465	Vascular leptomeningeal cell -> Astrocyte	Hippocampus
2264	Fibroblast	Astrocyte	LAMA2	ITGAV_ITGB8	0.342848	3	LAMA2_ITGAV_ITGB8	LAMA2 - (ITGAV+ITGB8)	LAMININ	ECM-Receptor	KEGG: hsa04512	Fibroblast -> Astrocyte (Hippo)	0.0541094	Fibroblast -> Astrocyte	Hippocampus
2265	Endothelial	Astrocyte	LAMA2	ITGAV_ITGB8	0.202174	3	LAMA2_ITGAV_ITGB8	LAMA2 - (ITGAV+ITGB8)	LAMININ	ECM-Receptor	KEGG: hsa04512	Endothelial -> Astrocyte (Hippo)	0.00711011	Endothelial -> Astrocyte	Hippocampus
2266	Microglia (PCDH9high)	Glutamatergic	LAMA2	ITGAV_ITGB8	0.178003	3	LAMA2_ITGAV_ITGB8	LAMA2 - (ITGAV+ITGB8)	LAMININ	ECM-Receptor	KEGG: hsa04512	Microglia (PCDH9high) -> Glutamatergic (Hippo)	0.00363234	Microglia (PCDH9high) -> Glutamatergic	Hippocampus
2267	Oligodendrocyte	Glutamatergic	LAMA2	ITGAV_ITGB8	0.179446	3	LAMA2_ITGAV_ITGB8	LAMA2 - (ITGAV+ITGB8)	LAMININ	ECM-Receptor	KEGG: hsa04512	Oligodendrocyte -> Glutamatergic (Hippo)	0.00380014	Oligodendrocyte -> Glutamatergic	Hippocampus
2268	Vascular leptomeningeal cell	Glutamatergic	LAMA2	ITGAV_ITGB8	0.246239	3	LAMA2_ITGAV_ITGB8	LAMA2 - (ITGAV+ITGB8)	LAMININ	ECM-Receptor	KEGG: hsa04512	Vascular leptomeningeal cell -> Glutamatergic (Hippo)	0.0172302	Vascular leptomeningeal cell -> Glutamatergic	Hippocampus
2269	Fibroblast	Glutamatergic	LAMA2	ITGAV_ITGB8	0.287196	3	LAMA2_ITGAV_ITGB8	LAMA2 - (ITGAV+ITGB8)	LAMININ	ECM-Receptor	KEGG: hsa04512	Fibroblast -> Glutamatergic (Hippo)	0.0307475	Fibroblast -> Glutamatergic	Hippocampus
2270	Endothelial	Glutamatergic	LAMA2	ITGAV_ITGB8	0.180745	3	LAMA2_ITGAV_ITGB8	LAMA2 - (ITGAV+ITGB8)	LAMININ	ECM-Receptor	KEGG: hsa04512	Endothelial -> Glutamatergic (Hippo)	0.00395545	Endothelial -> Glutamatergic	Hippocampus
2514	Microglia (PCDH9high)	Astrocyte	LAMA2	CD44	0.187658	3	LAMA2_CD44	LAMA2 - CD44	LAMININ	ECM-Receptor	KEGG: hsa04512	Microglia (PCDH9high) -> Astrocyte (Hippo)	0.00484969	Microglia (PCDH9high) -> Astrocyte	Hippocampus
2515	Oligodendrocyte	Astrocyte	LAMA2	CD44	0.18926	3	LAMA2_CD44	LAMA2 - CD44	LAMININ	ECM-Receptor	KEGG: hsa04512	Oligodendrocyte -> Astrocyte (Hippo)	0.00507343	Oligodendrocyte -> Astrocyte	Hippocampus
2516	Vascular leptomeningeal cell	Astrocyte	LAMA2	CD44	0.264787	3	LAMA2_CD44	LAMA2 - CD44	LAMININ	ECM-Receptor	KEGG: hsa04512	Vascular leptomeningeal cell -> Astrocyte (Hippo)	0.0229	Vascular leptomeningeal cell -> Astrocyte	Hippocampus
2517	Fibroblast	Astrocyte	LAMA2	CD44	0.312306	3	LAMA2_CD44	LAMA2 - CD44	LAMININ	ECM-Receptor	KEGG: hsa04512	Fibroblast -> Astrocyte (Hippo)	0.0406812	Fibroblast -> Astrocyte	Hippocampus
2518	Endothelial	Astrocyte	LAMA2	CD44	0.190704	3	LAMA2_CD44	LAMA2 - CD44	LAMININ	ECM-Receptor	KEGG: hsa04512	Endothelial -> Astrocyte (Hippo)	0.0052805	Endothelial -> Astrocyte	Hippocampus
881	Oligodendrocyte	Newly formed oligodendrocyte	LAMA2	DAG1	0.17935	3	LAMA2_DAG1	LAMA2 - DAG1	LAMININ	ECM-Receptor	KEGG: hsa04512	Oligodendrocyte -> Newly formed oligodendrocyte (CC)	0.00378882	Oligodendrocyte -> Newly formed oligodendrocyte	Prefrontal cortex
882	Vascular leptomeningeal cell	Newly formed oligodendrocyte	LAMA2	DAG1	0.261571	3	LAMA2_DAG1	LAMA2 - DAG1	LAMININ	ECM-Receptor	KEGG: hsa04512	Vascular leptomeningeal cell -> Newly formed oligodendrocyte (CC)	0.0218609	Vascular leptomeningeal cell -> Newly formed oligodendrocyte	Prefrontal cortex
883	Fibroblast	Newly formed oligodendrocyte	LAMA2	DAG1	0.28201	3	LAMA2_DAG1	LAMA2 - DAG1	LAMININ	ECM-Receptor	KEGG: hsa04512	Fibroblast -> Newly formed oligodendrocyte (CC)	0.0288405	Fibroblast -> Newly formed oligodendrocyte	Prefrontal cortex
884	Endothelial	Newly formed oligodendrocyte	LAMA2	DAG1	0.181565	3	LAMA2_DAG1	LAMA2 - DAG1	LAMININ	ECM-Receptor	KEGG: hsa04512	Endothelial -> Newly formed oligodendrocyte (CC)	0.00405554	Endothelial -> Newly formed oligodendrocyte	Prefrontal cortex
885	Glutamatergic	Newly formed oligodendrocyte	LAMA2	DAG1	0.150498	3	LAMA2_DAG1	LAMA2 - DAG1	LAMININ	ECM-Receptor	KEGG: hsa04512	Glutamatergic -> Newly formed oligodendrocyte (CC)	0.00130104	Glutamatergic -> Newly formed oligodendrocyte	Prefrontal cortex
738	Oligodendrocyte	Newly formed oligodendrocyte	LAMA2	SV2A	0.174798	3	LAMA2_SV2A	LAMA2 - SV2A	LAMININ	ECM-Receptor	KEGG: hsa04512	Oligodendrocyte -> Newly formed oligodendrocyte (CC)	0.00327677	Oligodendrocyte -> Newly formed oligodendrocyte	Prefrontal cortex
739	Vascular leptomeningeal cell	Newly formed oligodendrocyte	LAMA2	SV2A	0.252156	3	LAMA2_SV2A	LAMA2 - SV2A	LAMININ	ECM-Receptor	KEGG: hsa04512	Vascular leptomeningeal cell -> Newly formed oligodendrocyte (CC)	0.0189529	Vascular leptomeningeal cell -> Newly formed oligodendrocyte	Prefrontal cortex
740	Fibroblast	Newly formed oligodendrocyte	LAMA2	SV2A	0.271167	3	LAMA2_SV2A	LAMA2 - SV2A	LAMININ	ECM-Receptor	KEGG: hsa04512	Fibroblast -> Newly formed oligodendrocyte (CC)	0.0250278	Fibroblast -> Newly formed oligodendrocyte	Prefrontal cortex
741	Endothelial	Newly formed oligodendrocyte	LAMA2	SV2A	0.176903	3	LAMA2_SV2A	LAMA2 - SV2A	LAMININ	ECM-Receptor	KEGG: hsa04512	Endothelial -> Newly formed oligodendrocyte (CC)	0.00350757	Endothelial -> Newly formed oligodendrocyte	Prefrontal cortex
742	Glutamatergic	Newly formed oligodendrocyte	LAMA2	SV2A	0.147273	3	LAMA2_SV2A	LAMA2 - SV2A	LAMININ	ECM-Receptor	KEGG: hsa04512	Glutamatergic -> Newly formed oligodendrocyte (CC)	0.00112483	Glutamatergic -> Newly formed oligodendrocyte	Prefrontal cortex
743	Oligodendrocyte	GABAergic	LAMA2	SV2A	0.242003	3	LAMA2_SV2A	LAMA2 - SV2A	LAMININ	ECM-Receptor	KEGG: hsa04512	Oligodendrocyte -> GABAergic (CC)	0.0160479	Oligodendrocyte -> GABAergic	Prefrontal cortex
744	Vascular leptomeningeal cell	GABAergic	LAMA2	SV2A	0.410413	3	LAMA2_SV2A	LAMA2 - SV2A	LAMININ	ECM-Receptor	KEGG: hsa04512	Vascular leptomeningeal cell -> GABAergic (CC)	0.0874601	Vascular leptomeningeal cell -> GABAergic	Prefrontal cortex
745	Fibroblast	GABAergic	LAMA2	SV2A	0.458573	3	LAMA2_SV2A	LAMA2 - SV2A	LAMININ	ECM-Receptor	KEGG: hsa04512	Fibroblast -> GABAergic (CC)	0.112965	Fibroblast -> GABAergic	Prefrontal cortex
746	Endothelial	GABAergic	LAMA2	SV2A	0.246002	3	LAMA2_SV2A	LAMA2 - SV2A	LAMININ	ECM-Receptor	KEGG: hsa04512	Endothelial -> GABAergic (CC)	0.0171627	Endothelial -> GABAergic	Prefrontal cortex
747	Glutamatergic	GABAergic	LAMA2	SV2A	0.192569	3	LAMA2_SV2A	LAMA2 - SV2A	LAMININ	ECM-Receptor	KEGG: hsa04512	Glutamatergic -> GABAergic (CC)	0.00555556	Glutamatergic -> GABAergic	Prefrontal cortex
748	Oligodendrocyte	Glutamatergic	LAMA2	SV2A	0.230533	3	LAMA2_SV2A	LAMA2 - SV2A	LAMININ	ECM-Receptor	KEGG: hsa04512	Oligodendrocyte -> Glutamatergic (CC)	0.0130656	Oligodendrocyte -> Glutamatergic	Prefrontal cortex
749	Vascular leptomeningeal cell	Glutamatergic	LAMA2	SV2A	0.380432	3	LAMA2_SV2A	LAMA2 - SV2A	LAMININ	ECM-Receptor	KEGG: hsa04512	Vascular leptomeningeal cell -> Glutamatergic (CC)	0.0721803	Vascular leptomeningeal cell -> Glutamatergic	Prefrontal cortex
750	Fibroblast	Glutamatergic	LAMA2	SV2A	0.422333	3	LAMA2_SV2A	LAMA2 - SV2A	LAMININ	ECM-Receptor	KEGG: hsa04512	Fibroblast -> Glutamatergic (CC)	0.0936866	Fibroblast -> Glutamatergic	Prefrontal cortex
751	Endothelial	Glutamatergic	LAMA2	SV2A	0.23417	3	LAMA2_SV2A	LAMA2 - SV2A	LAMININ	ECM-Receptor	KEGG: hsa04512	Endothelial -> Glutamatergic (CC)	0.0139762	Endothelial -> Glutamatergic	Prefrontal cortex
752	Glutamatergic	Glutamatergic	LAMA2	SV2A	0.185167	3	LAMA2_SV2A	LAMA2 - SV2A	LAMININ	ECM-Receptor	KEGG: hsa04512	Glutamatergic -> Glutamatergic (CC)	0.00451418	Glutamatergic -> Glutamatergic	Prefrontal cortex
753	Oligodendrocyte	Glutamatergic(Pyr)	LAMA2	SV2A	0.225789	3	LAMA2_SV2A	LAMA2 - SV2A	LAMININ	ECM-Receptor	KEGG: hsa04512	Oligodendrocyte -> Glutamatergic(Pyr) (CC)	0.0119274	Oligodendrocyte -> Glutamatergic(Pyr)	Prefrontal cortex
754	Vascular leptomeningeal cell	Glutamatergic(Pyr)	LAMA2	SV2A	0.368392	3	LAMA2_SV2A	LAMA2 - SV2A	LAMININ	ECM-Receptor	KEGG: hsa04512	Vascular leptomeningeal cell -> Glutamatergic(Pyr) (CC)	0.0662381	Vascular leptomeningeal cell -> Glutamatergic(Pyr)	Prefrontal cortex
755	Fibroblast	Glutamatergic(Pyr)	LAMA2	SV2A	0.407863	3	LAMA2_SV2A	LAMA2 - SV2A	LAMININ	ECM-Receptor	KEGG: hsa04512	Fibroblast -> Glutamatergic(Pyr) (CC)	0.0861383	Fibroblast -> Glutamatergic(Pyr)	Prefrontal cortex
756	Endothelial	Glutamatergic(Pyr)	LAMA2	SV2A	0.229281	3	LAMA2_SV2A	LAMA2 - SV2A	LAMININ	ECM-Receptor	KEGG: hsa04512	Endothelial -> Glutamatergic(Pyr) (CC)	0.0127597	Endothelial -> Glutamatergic(Pyr)	Prefrontal cortex
757	Glutamatergic	Glutamatergic(Pyr)	LAMA2	SV2A	0.182069	3	LAMA2_SV2A	LAMA2 - SV2A	LAMININ	ECM-Receptor	KEGG: hsa04512	Glutamatergic -> Glutamatergic(Pyr) (CC)	0.00411783	Glutamatergic -> Glutamatergic(Pyr)	Prefrontal cortex
2571	Microglia (PCDH9high)	GABAergic	LAMA2	SV2A	0.190456	3	LAMA2_SV2A	LAMA2 - SV2A	LAMININ	ECM-Receptor	KEGG: hsa04512	Microglia (PCDH9high) -> GABAergic (Hippo)	0.00524459	Microglia (PCDH9high) -> GABAergic	Hippocampus
2572	Oligodendrocyte	GABAergic	LAMA2	SV2A	0.192105	3	LAMA2_SV2A	LAMA2 - SV2A	LAMININ	ECM-Receptor	KEGG: hsa04512	Oligodendrocyte -> GABAergic (Hippo)	0.00548645	Oligodendrocyte -> GABAergic	Hippocampus
2573	Vascular leptomeningeal cell	GABAergic	LAMA2	SV2A	0.270284	3	LAMA2_SV2A	LAMA2 - SV2A	LAMININ	ECM-Receptor	KEGG: hsa04512	Vascular leptomeningeal cell -> GABAergic (Hippo)	0.0247282	Vascular leptomeningeal cell -> GABAergic	Hippocampus
2574	Fibroblast	GABAergic	LAMA2	SV2A	0.319833	3	LAMA2_SV2A	LAMA2 - SV2A	LAMININ	ECM-Receptor	KEGG: hsa04512	Fibroblast -> GABAergic (Hippo)	0.0438652	Fibroblast -> GABAergic	Hippocampus
2575	Endothelial	GABAergic	LAMA2	SV2A	0.193593	3	LAMA2_SV2A	LAMA2 - SV2A	LAMININ	ECM-Receptor	KEGG: hsa04512	Endothelial -> GABAergic (Hippo)	0.00571028	Endothelial -> GABAergic	Hippocampus
2576	Microglia (PCDH9high)	Glutamatergic	LAMA2	SV2A	0.177206	3	LAMA2_SV2A	LAMA2 - SV2A	LAMININ	ECM-Receptor	KEGG: hsa04512	Microglia (PCDH9high) -> Glutamatergic (Hippo)	0.00354166	Microglia (PCDH9high) -> Glutamatergic	Hippocampus
2577	Oligodendrocyte	Glutamatergic	LAMA2	SV2A	0.178635	3	LAMA2_SV2A	LAMA2 - SV2A	LAMININ	ECM-Receptor	KEGG: hsa04512	Oligodendrocyte -> Glutamatergic (Hippo)	0.00370528	Oligodendrocyte -> Glutamatergic	Hippocampus
2578	Vascular leptomeningeal cell	Glutamatergic	LAMA2	SV2A	0.244736	3	LAMA2_SV2A	LAMA2 - SV2A	LAMININ	ECM-Receptor	KEGG: hsa04512	Vascular leptomeningeal cell -> Glutamatergic (Hippo)	0.0168058	Vascular leptomeningeal cell -> Glutamatergic	Hippocampus
2579	Fibroblast	Glutamatergic	LAMA2	SV2A	0.285181	3	LAMA2_SV2A	LAMA2 - SV2A	LAMININ	ECM-Receptor	KEGG: hsa04512	Fibroblast -> Glutamatergic (Hippo)	0.0300003	Fibroblast -> Glutamatergic	Hippocampus
2580	Endothelial	Glutamatergic	LAMA2	SV2A	0.179923	3	LAMA2_SV2A	LAMA2 - SV2A	LAMININ	ECM-Receptor	KEGG: hsa04512	Endothelial -> Glutamatergic (Hippo)	0.00385673	Endothelial -> Glutamatergic	Hippocampus
810	Oligodendrocyte	Glutamatergic	LAMA2	SV2B	0.277306	3	LAMA2_SV2B	LAMA2 - SV2B	LAMININ	ECM-Receptor	KEGG: hsa04512	Oligodendrocyte -> Glutamatergic (CC)	0.0271568	Oligodendrocyte -> Glutamatergic	Prefrontal cortex
811	Vascular leptomeningeal cell	Glutamatergic	LAMA2	SV2B	0.510324	3	LAMA2_SV2B	LAMA2 - SV2B	LAMININ	ECM-Receptor	KEGG: hsa04512	Vascular leptomeningeal cell -> Glutamatergic (CC)	0.140923	Vascular leptomeningeal cell -> Glutamatergic	Prefrontal cortex
812	Fibroblast	Glutamatergic	LAMA2	SV2B	0.581197	3	LAMA2_SV2B	LAMA2 - SV2B	LAMININ	ECM-Receptor	KEGG: hsa04512	Fibroblast -> Glutamatergic (CC)	0.178961	Fibroblast -> Glutamatergic	Prefrontal cortex
813	Endothelial	Glutamatergic	LAMA2	SV2B	0.282506	3	LAMA2_SV2B	LAMA2 - SV2B	LAMININ	ECM-Receptor	KEGG: hsa04512	Endothelial -> Glutamatergic (CC)	0.0290207	Endothelial -> Glutamatergic	Prefrontal cortex
814	Glutamatergic	Glutamatergic	LAMA2	SV2B	0.214616	3	LAMA2_SV2B	LAMA2 - SV2B	LAMININ	ECM-Receptor	KEGG: hsa04512	Glutamatergic -> Glutamatergic (CC)	0.00947124	Glutamatergic -> Glutamatergic	Prefrontal cortex
815	Oligodendrocyte	Glutamatergic(Pyr)	LAMA2	SV2B	0.217043	3	LAMA2_SV2B	LAMA2 - SV2B	LAMININ	ECM-Receptor	KEGG: hsa04512	Oligodendrocyte -> Glutamatergic(Pyr) (CC)	0.00997792	Oligodendrocyte -> Glutamatergic(Pyr)	Prefrontal cortex
816	Vascular leptomeningeal cell	Glutamatergic(Pyr)	LAMA2	SV2B	0.346748	3	LAMA2_SV2B	LAMA2 - SV2B	LAMININ	ECM-Receptor	KEGG: hsa04512	Vascular leptomeningeal cell -> Glutamatergic(Pyr) (CC)	0.0559141	Vascular leptomeningeal cell -> Glutamatergic(Pyr)	Prefrontal cortex
817	Fibroblast	Glutamatergic(Pyr)	LAMA2	SV2B	0.381984	3	LAMA2_SV2B	LAMA2 - SV2B	LAMININ	ECM-Receptor	KEGG: hsa04512	Fibroblast -> Glutamatergic(Pyr) (CC)	0.072955	Fibroblast -> Glutamatergic(Pyr)	Prefrontal cortex
818	Endothelial	Glutamatergic(Pyr)	LAMA2	SV2B	0.220275	3	LAMA2_SV2B	LAMA2 - SV2B	LAMININ	ECM-Receptor	KEGG: hsa04512	Endothelial -> Glutamatergic(Pyr) (CC)	0.0106757	Endothelial -> Glutamatergic(Pyr)	Prefrontal cortex
819	Glutamatergic	Glutamatergic(Pyr)	LAMA2	SV2B	0.176299	3	LAMA2_SV2B	LAMA2 - SV2B	LAMININ	ECM-Receptor	KEGG: hsa04512	Glutamatergic -> Glutamatergic(Pyr) (CC)	0.00344035	Glutamatergic -> Glutamatergic(Pyr)	Prefrontal cortex
2610	Microglia (PCDH9high)	Glutamatergic	LAMA2	SV2B	0.241496	3	LAMA2_SV2B	LAMA2 - SV2B	LAMININ	ECM-Receptor	KEGG: hsa04512	Microglia (PCDH9high) -> Glutamatergic (Hippo)	0.0159091	Microglia (PCDH9high) -> Glutamatergic	Hippocampus
2611	Oligodendrocyte	Glutamatergic	LAMA2	SV2B	0.244124	3	LAMA2_SV2B	LAMA2 - SV2B	LAMININ	ECM-Receptor	KEGG: hsa04512	Oligodendrocyte -> Glutamatergic (Hippo)	0.0166346	Oligodendrocyte -> Glutamatergic	Hippocampus
2612	Vascular leptomeningeal cell	Glutamatergic	LAMA2	SV2B	0.380348	3	LAMA2_SV2B	LAMA2 - SV2B	LAMININ	ECM-Receptor	KEGG: hsa04512	Vascular leptomeningeal cell -> Glutamatergic (Hippo)	0.0721384	Vascular leptomeningeal cell -> Glutamatergic	Hippocampus
2613	Fibroblast	Glutamatergic	LAMA2	SV2B	0.477801	3	LAMA2_SV2B	LAMA2 - SV2B	LAMININ	ECM-Receptor	KEGG: hsa04512	Fibroblast -> Glutamatergic (Hippo)	0.123326	Fibroblast -> Glutamatergic	Hippocampus
2614	Endothelial	Glutamatergic	LAMA2	SV2B	0.246503	3	LAMA2_SV2B	LAMA2 - SV2B	LAMININ	ECM-Receptor	KEGG: hsa04512	Endothelial -> Glutamatergic (Hippo)	0.0173053	Endothelial -> Glutamatergic	Hippocampus
2023	Endothelial	Vascular leptomeningeal cell	LAMA3	ITGA1_ITGB1	0.180755	3	LAMA3_ITGA1_ITGB1	LAMA3 - (ITGA1+ITGB1)	LAMININ	ECM-Receptor	KEGG: hsa04512	Endothelial -> Vascular leptomeningeal cell (Hippo)	0.00395667	Endothelial -> Vascular leptomeningeal cell	Hippocampus
2024	Endothelial	Endothelial	LAMA3	ITGA1_ITGB1	0.214927	3	LAMA3_ITGA1_ITGB1	LAMA3 - (ITGA1+ITGB1)	LAMININ	ECM-Receptor	KEGG: hsa04512	Endothelial -> Endothelial (Hippo)	0.00953551	Endothelial -> Endothelial	Hippocampus
2057	Endothelial	Endothelial	LAMA3	ITGA6_ITGB1	0.217471	3	LAMA3_ITGA6_ITGB1	LAMA3 - (ITGA6+ITGB1)	LAMININ	ECM-Receptor	KEGG: hsa04512	Endothelial -> Endothelial (Hippo)	0.0100688	Endothelial -> Endothelial	Hippocampus
2472	Endothelial	Astrocyte	LAMA3	ITGA6_ITGB4	0.16244	3	LAMA3_ITGA6_ITGB4	LAMA3 - (ITGA6+ITGB4)	LAMININ	ECM-Receptor	KEGG: hsa04512	Endothelial -> Astrocyte (Hippo)	0.0021205	Endothelial -> Astrocyte	Hippocampus
2083	Endothelial	Vascular leptomeningeal cell	LAMA3	ITGA7_ITGB1	0.172919	3	LAMA3_ITGA7_ITGB1	LAMA3 - (ITGA7+ITGB1)	LAMININ	ECM-Receptor	KEGG: hsa04512	Endothelial -> Vascular leptomeningeal cell (Hippo)	0.00307927	Endothelial -> Vascular leptomeningeal cell	Hippocampus
2084	Endothelial	Glutamatergic	LAMA3	ITGA7_ITGB1	0.162819	3	LAMA3_ITGA7_ITGB1	LAMA3 - (ITGA7+ITGB1)	LAMININ	ECM-Receptor	KEGG: hsa04512	Endothelial -> Glutamatergic (Hippo)	0.0021511	Endothelial -> Glutamatergic	Hippocampus
2197	Endothelial	GABAergic	LAMA3	ITGA9_ITGB1	0.144114	3	LAMA3_ITGA9_ITGB1	LAMA3 - (ITGA9+ITGB1)	LAMININ	ECM-Receptor	KEGG: hsa04512	Endothelial -> GABAergic (Hippo)	0.000969296	Endothelial -> GABAergic	Hippocampus
2198	Endothelial	Glutamatergic	LAMA3	ITGA9_ITGB1	0.169188	3	LAMA3_ITGA9_ITGB1	LAMA3 - (ITGA9+ITGB1)	LAMININ	ECM-Receptor	KEGG: hsa04512	Endothelial -> Glutamatergic (Hippo)	0.00271061	Endothelial -> Glutamatergic	Hippocampus
2271	Endothelial	Microglia (PCDH9high)	LAMA3	ITGAV_ITGB8	0.17166	3	LAMA3_ITGAV_ITGB8	LAMA3 - (ITGAV+ITGB8)	LAMININ	ECM-Receptor	KEGG: hsa04512	Endothelial -> Microglia (PCDH9high) (Hippo)	0.00295145	Endothelial -> Microglia (PCDH9high)	Hippocampus
2272	Endothelial	Oligodendrocyte precursor	LAMA3	ITGAV_ITGB8	0.1846	3	LAMA3_ITGAV_ITGB8	LAMA3 - (ITGAV+ITGB8)	LAMININ	ECM-Receptor	KEGG: hsa04512	Endothelial -> Oligodendrocyte precursor (Hippo)	0.00443999	Endothelial -> Oligodendrocyte precursor	Hippocampus
2273	Endothelial	Newly formed oligodendrocyte	LAMA3	ITGAV_ITGB8	0.161088	3	LAMA3_ITGAV_ITGB8	LAMA3 - (ITGAV+ITGB8)	LAMININ	ECM-Receptor	KEGG: hsa04512	Endothelial -> Newly formed oligodendrocyte (Hippo)	0.00201371	Endothelial -> Newly formed oligodendrocyte	Hippocampus
2274	Endothelial	Astrocyte	LAMA3	ITGAV_ITGB8	0.172175	3	LAMA3_ITGAV_ITGB8	LAMA3 - (ITGAV+ITGB8)	LAMININ	ECM-Receptor	KEGG: hsa04512	Endothelial -> Astrocyte (Hippo)	0.00300327	Endothelial -> Astrocyte	Hippocampus
2275	Endothelial	Glutamatergic	LAMA3	ITGAV_ITGB8	0.15634	3	LAMA3_ITGAV_ITGB8	LAMA3 - (ITGAV+ITGB8)	LAMININ	ECM-Receptor	KEGG: hsa04512	Endothelial -> Glutamatergic (Hippo)	0.0016677	Endothelial -> Glutamatergic	Hippocampus
2519	Endothelial	Astrocyte	LAMA3	CD44	0.163757	3	LAMA3_CD44	LAMA3 - CD44	LAMININ	ECM-Receptor	KEGG: hsa04512	Endothelial -> Astrocyte (Hippo)	0.00222808	Endothelial -> Astrocyte	Hippocampus
2581	Endothelial	GABAergic	LAMA3	SV2A	0.165889	3	LAMA3_SV2A	LAMA3 - SV2A	LAMININ	ECM-Receptor	KEGG: hsa04512	Endothelial -> GABAergic (Hippo)	0.00241003	Endothelial -> GABAergic	Hippocampus
2582	Endothelial	Glutamatergic	LAMA3	SV2A	0.155723	3	LAMA3_SV2A	LAMA3 - SV2A	LAMININ	ECM-Receptor	KEGG: hsa04512	Endothelial -> Glutamatergic (Hippo)	0.00162598	Endothelial -> Glutamatergic	Hippocampus
2615	Endothelial	Glutamatergic	LAMA3	SV2B	0.203558	3	LAMA3_SV2B	LAMA3 - SV2B	LAMININ	ECM-Receptor	KEGG: hsa04512	Endothelial -> Glutamatergic (Hippo)	0.00735327	Endothelial -> Glutamatergic	Hippocampus
466	Oligodendrocyte precursor	Vascular leptomeningeal cell	LAMA4	ITGA1_ITGB1	0.186658	3	LAMA4_ITGA1_ITGB1	LAMA4 - (ITGA1+ITGB1)	LAMININ	ECM-Receptor	KEGG: hsa04512	Oligodendrocyte precursor -> Vascular leptomeningeal cell (CC)	0.00471315	Oligodendrocyte precursor -> Vascular leptomeningeal cell	Prefrontal cortex
467	Vascular leptomeningeal cell	Vascular leptomeningeal cell	LAMA4	ITGA1_ITGB1	0.205008	3	LAMA4_ITGA1_ITGB1	LAMA4 - (ITGA1+ITGB1)	LAMININ	ECM-Receptor	KEGG: hsa04512	Vascular leptomeningeal cell -> Vascular leptomeningeal cell (CC)	0.00761329	Vascular leptomeningeal cell -> Vascular leptomeningeal cell	Prefrontal cortex
468	Fibroblast	Vascular leptomeningeal cell	LAMA4	ITGA1_ITGB1	0.27266	3	LAMA4_ITGA1_ITGB1	LAMA4 - (ITGA1+ITGB1)	LAMININ	ECM-Receptor	KEGG: hsa04512	Fibroblast -> Vascular leptomeningeal cell (CC)	0.0255385	Fibroblast -> Vascular leptomeningeal cell	Prefrontal cortex
469	Endothelial	Vascular leptomeningeal cell	LAMA4	ITGA1_ITGB1	0.17691	3	LAMA4_ITGA1_ITGB1	LAMA4 - (ITGA1+ITGB1)	LAMININ	ECM-Receptor	KEGG: hsa04512	Endothelial -> Vascular leptomeningeal cell (CC)	0.00350837	Endothelial -> Vascular leptomeningeal cell	Prefrontal cortex
470	Oligodendrocyte precursor	Endothelial	LAMA4	ITGA1_ITGB1	0.226398	3	LAMA4_ITGA1_ITGB1	LAMA4 - (ITGA1+ITGB1)	LAMININ	ECM-Receptor	KEGG: hsa04512	Oligodendrocyte precursor -> Endothelial (CC)	0.0120703	Oligodendrocyte precursor -> Endothelial	Prefrontal cortex
471	Vascular leptomeningeal cell	Endothelial	LAMA4	ITGA1_ITGB1	0.253678	3	LAMA4_ITGA1_ITGB1	LAMA4 - (ITGA1+ITGB1)	LAMININ	ECM-Receptor	KEGG: hsa04512	Vascular leptomeningeal cell -> Endothelial (CC)	0.0194092	Vascular leptomeningeal cell -> Endothelial	Prefrontal cortex
472	Fibroblast	Endothelial	LAMA4	ITGA1_ITGB1	0.362408	3	LAMA4_ITGA1_ITGB1	LAMA4 - (ITGA1+ITGB1)	LAMININ	ECM-Receptor	KEGG: hsa04512	Fibroblast -> Endothelial (CC)	0.0633348	Fibroblast -> Endothelial	Prefrontal cortex
473	Endothelial	Endothelial	LAMA4	ITGA1_ITGB1	0.2123	3	LAMA4_ITGA1_ITGB1	LAMA4 - (ITGA1+ITGB1)	LAMININ	ECM-Receptor	KEGG: hsa04512	Endothelial -> Endothelial (CC)	0.00900186	Endothelial -> Endothelial	Prefrontal cortex
2025	Oligodendrocyte precursor	Vascular leptomeningeal cell	LAMA4	ITGA1_ITGB1	0.190668	3	LAMA4_ITGA1_ITGB1	LAMA4 - (ITGA1+ITGB1)	LAMININ	ECM-Receptor	KEGG: hsa04512	Oligodendrocyte precursor -> Vascular leptomeningeal cell (Hippo)	0.00527528	Oligodendrocyte precursor -> Vascular leptomeningeal cell	Hippocampus
2026	Vascular leptomeningeal cell	Vascular leptomeningeal cell	LAMA4	ITGA1_ITGB1	0.19992	3	LAMA4_ITGA1_ITGB1	LAMA4 - (ITGA1+ITGB1)	LAMININ	ECM-Receptor	KEGG: hsa04512	Vascular leptomeningeal cell -> Vascular leptomeningeal cell (Hippo)	0.00672452	Vascular leptomeningeal cell -> Vascular leptomeningeal cell	Hippocampus
2027	Fibroblast	Vascular leptomeningeal cell	LAMA4	ITGA1_ITGB1	0.273205	3	LAMA4_ITGA1_ITGB1	LAMA4 - (ITGA1+ITGB1)	LAMININ	ECM-Receptor	KEGG: hsa04512	Fibroblast -> Vascular leptomeningeal cell (Hippo)	0.0257261	Fibroblast -> Vascular leptomeningeal cell	Hippocampus
2028	Endothelial	Vascular leptomeningeal cell	LAMA4	ITGA1_ITGB1	0.189251	3	LAMA4_ITGA1_ITGB1	LAMA4 - (ITGA1+ITGB1)	LAMININ	ECM-Receptor	KEGG: hsa04512	Endothelial -> Vascular leptomeningeal cell (Hippo)	0.00507214	Endothelial -> Vascular leptomeningeal cell	Hippocampus
2029	Oligodendrocyte precursor	Endothelial	LAMA4	ITGA1_ITGB1	0.228992	3	LAMA4_ITGA1_ITGB1	LAMA4 - (ITGA1+ITGB1)	LAMININ	ECM-Receptor	KEGG: hsa04512	Oligodendrocyte precursor -> Endothelial (Hippo)	0.0126897	Oligodendrocyte precursor -> Endothelial	Hippocampus
2030	Vascular leptomeningeal cell	Endothelial	LAMA4	ITGA1_ITGB1	0.242349	3	LAMA4_ITGA1_ITGB1	LAMA4 - (ITGA1+ITGB1)	LAMININ	ECM-Receptor	KEGG: hsa04512	Vascular leptomeningeal cell -> Endothelial (Hippo)	0.0161427	Vascular leptomeningeal cell -> Endothelial	Hippocampus
2031	Fibroblast	Endothelial	LAMA4	ITGA1_ITGB1	0.355748	3	LAMA4_ITGA1_ITGB1	LAMA4 - (ITGA1+ITGB1)	LAMININ	ECM-Receptor	KEGG: hsa04512	Fibroblast -> Endothelial (Hippo)	0.060146	Fibroblast -> Endothelial	Hippocampus
2032	Endothelial	Endothelial	LAMA4	ITGA1_ITGB1	0.226966	3	LAMA4_ITGA1_ITGB1	LAMA4 - (ITGA1+ITGB1)	LAMININ	ECM-Receptor	KEGG: hsa04512	Endothelial -> Endothelial (Hippo)	0.0122045	Endothelial -> Endothelial	Hippocampus
497	Oligodendrocyte precursor	Endothelial	LAMA4	ITGA6_ITGB1	0.221768	3	LAMA4_ITGA6_ITGB1	LAMA4 - (ITGA6+ITGB1)	LAMININ	ECM-Receptor	KEGG: hsa04512	Oligodendrocyte precursor -> Endothelial (CC)	0.011007	Oligodendrocyte precursor -> Endothelial	Prefrontal cortex
498	Vascular leptomeningeal cell	Endothelial	LAMA4	ITGA6_ITGB1	0.24792	3	LAMA4_ITGA6_ITGB1	LAMA4 - (ITGA6+ITGB1)	LAMININ	ECM-Receptor	KEGG: hsa04512	Vascular leptomeningeal cell -> Endothelial (CC)	0.017711	Vascular leptomeningeal cell -> Endothelial	Prefrontal cortex
499	Fibroblast	Endothelial	LAMA4	ITGA6_ITGB1	0.351253	3	LAMA4_ITGA6_ITGB1	LAMA4 - (ITGA6+ITGB1)	LAMININ	ECM-Receptor	KEGG: hsa04512	Fibroblast -> Endothelial (CC)	0.058021	Fibroblast -> Endothelial	Prefrontal cortex
500	Endothelial	Endothelial	LAMA4	ITGA6_ITGB1	0.208211	3	LAMA4_ITGA6_ITGB1	LAMA4 - (ITGA6+ITGB1)	LAMININ	ECM-Receptor	KEGG: hsa04512	Endothelial -> Endothelial (CC)	0.00820666	Endothelial -> Endothelial	Prefrontal cortex
2058	Oligodendrocyte precursor	Endothelial	LAMA4	ITGA6_ITGB1	0.231872	3	LAMA4_ITGA6_ITGB1	LAMA4 - (ITGA6+ITGB1)	LAMININ	ECM-Receptor	KEGG: hsa04512	Oligodendrocyte precursor -> Endothelial (Hippo)	0.013397	Oligodendrocyte precursor -> Endothelial	Hippocampus
2059	Vascular leptomeningeal cell	Endothelial	LAMA4	ITGA6_ITGB1	0.245565	3	LAMA4_ITGA6_ITGB1	LAMA4 - (ITGA6+ITGB1)	LAMININ	ECM-Receptor	KEGG: hsa04512	Vascular leptomeningeal cell -> Endothelial (Hippo)	0.0170392	Vascular leptomeningeal cell -> Endothelial	Hippocampus
2060	Fibroblast	Endothelial	LAMA4	ITGA6_ITGB1	0.362396	3	LAMA4_ITGA6_ITGB1	LAMA4 - (ITGA6+ITGB1)	LAMININ	ECM-Receptor	KEGG: hsa04512	Fibroblast -> Endothelial (Hippo)	0.0633289	Fibroblast -> Endothelial	Hippocampus
2061	Endothelial	Endothelial	LAMA4	ITGA6_ITGB1	0.229796	3	LAMA4_ITGA6_ITGB1	LAMA4 - (ITGA6+ITGB1)	LAMININ	ECM-Receptor	KEGG: hsa04512	Endothelial -> Endothelial (Hippo)	0.0128852	Endothelial -> Endothelial	Hippocampus
690	Oligodendrocyte precursor	Astrocyte	LAMA4	ITGA6_ITGB4	0.173814	3	LAMA4_ITGA6_ITGB4	LAMA4 - (ITGA6+ITGB4)	LAMININ	ECM-Receptor	KEGG: hsa04512	Oligodendrocyte precursor -> Astrocyte (CC)	0.00317237	Oligodendrocyte precursor -> Astrocyte	Prefrontal cortex
691	Vascular leptomeningeal cell	Astrocyte	LAMA4	ITGA6_ITGB4	0.189653	3	LAMA4_ITGA6_ITGB4	LAMA4 - (ITGA6+ITGB4)	LAMININ	ECM-Receptor	KEGG: hsa04512	Vascular leptomeningeal cell -> Astrocyte (CC)	0.0051293	Vascular leptomeningeal cell -> Astrocyte	Prefrontal cortex
692	Fibroblast	Astrocyte	LAMA4	ITGA6_ITGB4	0.246513	3	LAMA4_ITGA6_ITGB4	LAMA4 - (ITGA6+ITGB4)	LAMININ	ECM-Receptor	KEGG: hsa04512	Fibroblast -> Astrocyte (CC)	0.017308	Fibroblast -> Astrocyte	Prefrontal cortex
693	Endothelial	Astrocyte	LAMA4	ITGA6_ITGB4	0.16532	3	LAMA4_ITGA6_ITGB4	LAMA4 - (ITGA6+ITGB4)	LAMININ	ECM-Receptor	KEGG: hsa04512	Endothelial -> Astrocyte (CC)	0.00236051	Endothelial -> Astrocyte	Prefrontal cortex
2473	Oligodendrocyte precursor	Astrocyte	LAMA4	ITGA6_ITGB4	0.17042	3	LAMA4_ITGA6_ITGB4	LAMA4 - (ITGA6+ITGB4)	LAMININ	ECM-Receptor	KEGG: hsa04512	Oligodendrocyte precursor -> Astrocyte (Hippo)	0.00282892	Oligodendrocyte precursor -> Astrocyte	Hippocampus
2474	Vascular leptomeningeal cell	Astrocyte	LAMA4	ITGA6_ITGB4	0.177795	3	LAMA4_ITGA6_ITGB4	LAMA4 - (ITGA6+ITGB4)	LAMININ	ECM-Receptor	KEGG: hsa04512	Vascular leptomeningeal cell -> Astrocyte (Hippo)	0.00360853	Vascular leptomeningeal cell -> Astrocyte	Hippocampus
2475	Fibroblast	Astrocyte	LAMA4	ITGA6_ITGB4	0.233983	3	LAMA4_ITGA6_ITGB4	LAMA4 - (ITGA6+ITGB4)	LAMININ	ECM-Receptor	KEGG: hsa04512	Fibroblast -> Astrocyte (Hippo)	0.0139287	Fibroblast -> Astrocyte	Hippocampus
2476	Endothelial	Astrocyte	LAMA4	ITGA6_ITGB4	0.169284	3	LAMA4_ITGA6_ITGB4	LAMA4 - (ITGA6+ITGB4)	LAMININ	ECM-Receptor	KEGG: hsa04512	Endothelial -> Astrocyte (Hippo)	0.00271973	Endothelial -> Astrocyte	Hippocampus
515	Oligodendrocyte precursor	Vascular leptomeningeal cell	LAMA4	ITGA7_ITGB1	0.180043	3	LAMA4_ITGA7_ITGB1	LAMA4 - (ITGA7+ITGB1)	LAMININ	ECM-Receptor	KEGG: hsa04512	Oligodendrocyte precursor -> Vascular leptomeningeal cell (CC)	0.00387111	Oligodendrocyte precursor -> Vascular leptomeningeal cell	Prefrontal cortex
516	Vascular leptomeningeal cell	Vascular leptomeningeal cell	LAMA4	ITGA7_ITGB1	0.197077	3	LAMA4_ITGA7_ITGB1	LAMA4 - (ITGA7+ITGB1)	LAMININ	ECM-Receptor	KEGG: hsa04512	Vascular leptomeningeal cell -> Vascular leptomeningeal cell (CC)	0.00625636	Vascular leptomeningeal cell -> Vascular leptomeningeal cell	Prefrontal cortex
517	Fibroblast	Vascular leptomeningeal cell	LAMA4	ITGA7_ITGB1	0.259024	3	LAMA4_ITGA7_ITGB1	LAMA4 - (ITGA7+ITGB1)	LAMININ	ECM-Receptor	KEGG: hsa04512	Fibroblast -> Vascular leptomeningeal cell (CC)	0.0210545	Fibroblast -> Vascular leptomeningeal cell	Prefrontal cortex
518	Endothelial	Vascular leptomeningeal cell	LAMA4	ITGA7_ITGB1	0.170951	3	LAMA4_ITGA7_ITGB1	LAMA4 - (ITGA7+ITGB1)	LAMININ	ECM-Receptor	KEGG: hsa04512	Endothelial -> Vascular leptomeningeal cell (CC)	0.00288094	Endothelial -> Vascular leptomeningeal cell	Prefrontal cortex
2085	Oligodendrocyte precursor	Vascular leptomeningeal cell	LAMA4	ITGA7_ITGB1	0.181979	3	LAMA4_ITGA7_ITGB1	LAMA4 - (ITGA7+ITGB1)	LAMININ	ECM-Receptor	KEGG: hsa04512	Oligodendrocyte precursor -> Vascular leptomeningeal cell (Hippo)	0.00410668	Oligodendrocyte precursor -> Vascular leptomeningeal cell	Hippocampus
2086	Vascular leptomeningeal cell	Vascular leptomeningeal cell	LAMA4	ITGA7_ITGB1	0.1904	3	LAMA4_ITGA7_ITGB1	LAMA4 - (ITGA7+ITGB1)	LAMININ	ECM-Receptor	KEGG: hsa04512	Vascular leptomeningeal cell -> Vascular leptomeningeal cell (Hippo)	0.00523657	Vascular leptomeningeal cell -> Vascular leptomeningeal cell	Hippocampus
2087	Fibroblast	Vascular leptomeningeal cell	LAMA4	ITGA7_ITGB1	0.25601	3	LAMA4_ITGA7_ITGB1	LAMA4 - (ITGA7+ITGB1)	LAMININ	ECM-Receptor	KEGG: hsa04512	Fibroblast -> Vascular leptomeningeal cell (Hippo)	0.0201188	Fibroblast -> Vascular leptomeningeal cell	Hippocampus
2088	Endothelial	Vascular leptomeningeal cell	LAMA4	ITGA7_ITGB1	0.180686	3	LAMA4_ITGA7_ITGB1	LAMA4 - (ITGA7+ITGB1)	LAMININ	ECM-Receptor	KEGG: hsa04512	Endothelial -> Vascular leptomeningeal cell (Hippo)	0.00394836	Endothelial -> Vascular leptomeningeal cell	Hippocampus
2089	Oligodendrocyte precursor	Glutamatergic	LAMA4	ITGA7_ITGB1	0.170837	3	LAMA4_ITGA7_ITGB1	LAMA4 - (ITGA7+ITGB1)	LAMININ	ECM-Receptor	KEGG: hsa04512	Oligodendrocyte precursor -> Glutamatergic (Hippo)	0.00286972	Oligodendrocyte precursor -> Glutamatergic	Hippocampus
2090	Vascular leptomeningeal cell	Glutamatergic	LAMA4	ITGA7_ITGB1	0.178248	3	LAMA4_ITGA7_ITGB1	LAMA4 - (ITGA7+ITGB1)	LAMININ	ECM-Receptor	KEGG: hsa04512	Vascular leptomeningeal cell -> Glutamatergic (Hippo)	0.00366053	Vascular leptomeningeal cell -> Glutamatergic	Hippocampus
2091	Fibroblast	Glutamatergic	LAMA4	ITGA7_ITGB1	0.234761	3	LAMA4_ITGA7_ITGB1	LAMA4 - (ITGA7+ITGB1)	LAMININ	ECM-Receptor	KEGG: hsa04512	Fibroblast -> Glutamatergic (Hippo)	0.0141273	Fibroblast -> Glutamatergic	Hippocampus
2092	Endothelial	Glutamatergic	LAMA4	ITGA7_ITGB1	0.169696	3	LAMA4_ITGA7_ITGB1	LAMA4 - (ITGA7+ITGB1)	LAMININ	ECM-Receptor	KEGG: hsa04512	Endothelial -> Glutamatergic (Hippo)	0.00275896	Endothelial -> Glutamatergic	Hippocampus
2199	Oligodendrocyte precursor	GABAergic	LAMA4	ITGA9_ITGB1	0.150369	3	LAMA4_ITGA9_ITGB1	LAMA4 - (ITGA9+ITGB1)	LAMININ	ECM-Receptor	KEGG: hsa04512	Oligodendrocyte precursor -> GABAergic (Hippo)	0.00129362	Oligodendrocyte precursor -> GABAergic	Hippocampus
2200	Vascular leptomeningeal cell	GABAergic	LAMA4	ITGA9_ITGB1	0.156092	3	LAMA4_ITGA9_ITGB1	LAMA4 - (ITGA9+ITGB1)	LAMININ	ECM-Receptor	KEGG: hsa04512	Vascular leptomeningeal cell -> GABAergic (Hippo)	0.00165082	Vascular leptomeningeal cell -> GABAergic	Hippocampus
2201	Fibroblast	GABAergic	LAMA4	ITGA9_ITGB1	0.198012	3	LAMA4_ITGA9_ITGB1	LAMA4 - (ITGA9+ITGB1)	LAMININ	ECM-Receptor	KEGG: hsa04512	Fibroblast -> GABAergic (Hippo)	0.00640807	Fibroblast -> GABAergic	Hippocampus
2202	Endothelial	GABAergic	LAMA4	ITGA9_ITGB1	0.149483	3	LAMA4_ITGA9_ITGB1	LAMA4 - (ITGA9+ITGB1)	LAMININ	ECM-Receptor	KEGG: hsa04512	Endothelial -> GABAergic (Hippo)	0.00124361	Endothelial -> GABAergic	Hippocampus
2203	Oligodendrocyte precursor	Glutamatergic	LAMA4	ITGA9_ITGB1	0.177856	3	LAMA4_ITGA9_ITGB1	LAMA4 - (ITGA9+ITGB1)	LAMININ	ECM-Receptor	KEGG: hsa04512	Oligodendrocyte precursor -> Glutamatergic (Hippo)	0.00361546	Oligodendrocyte precursor -> Glutamatergic	Hippocampus
2204	Vascular leptomeningeal cell	Glutamatergic	LAMA4	ITGA9_ITGB1	0.185896	3	LAMA4_ITGA9_ITGB1	LAMA4 - (ITGA9+ITGB1)	LAMININ	ECM-Receptor	KEGG: hsa04512	Vascular leptomeningeal cell -> Glutamatergic (Hippo)	0.00461082	Vascular leptomeningeal cell -> Glutamatergic	Hippocampus
2205	Fibroblast	Glutamatergic	LAMA4	ITGA9_ITGB1	0.248042	3	LAMA4_ITGA9_ITGB1	LAMA4 - (ITGA9+ITGB1)	LAMININ	ECM-Receptor	KEGG: hsa04512	Fibroblast -> Glutamatergic (Hippo)	0.0177464	Fibroblast -> Glutamatergic	Hippocampus
2206	Endothelial	Glutamatergic	LAMA4	ITGA9_ITGB1	0.17662	3	LAMA4_ITGA9_ITGB1	LAMA4 - (ITGA9+ITGB1)	LAMININ	ECM-Receptor	KEGG: hsa04512	Endothelial -> Glutamatergic (Hippo)	0.00347602	Endothelial -> Glutamatergic	Hippocampus
580	Oligodendrocyte precursor	Oligodendrocyte precursor	LAMA4	ITGAV_ITGB8	0.195232	3	LAMA4_ITGAV_ITGB8	LAMA4 - (ITGAV+ITGB8)	LAMININ	ECM-Receptor	KEGG: hsa04512	Oligodendrocyte precursor -> Oligodendrocyte precursor (CC)	0.00596349	Oligodendrocyte precursor -> Oligodendrocyte precursor	Prefrontal cortex
581	Vascular leptomeningeal cell	Oligodendrocyte precursor	LAMA4	ITGAV_ITGB8	0.215362	3	LAMA4_ITGAV_ITGB8	LAMA4 - (ITGAV+ITGB8)	LAMININ	ECM-Receptor	KEGG: hsa04512	Vascular leptomeningeal cell -> Oligodendrocyte precursor (CC)	0.00962554	Vascular leptomeningeal cell -> Oligodendrocyte precursor	Prefrontal cortex
582	Fibroblast	Oligodendrocyte precursor	LAMA4	ITGAV_ITGB8	0.290883	3	LAMA4_ITGAV_ITGB8	LAMA4 - (ITGAV+ITGB8)	LAMININ	ECM-Receptor	KEGG: hsa04512	Fibroblast -> Oligodendrocyte precursor (CC)	0.0321351	Fibroblast -> Oligodendrocyte precursor	Prefrontal cortex
583	Endothelial	Oligodendrocyte precursor	LAMA4	ITGAV_ITGB8	0.184605	3	LAMA4_ITGAV_ITGB8	LAMA4 - (ITGAV+ITGB8)	LAMININ	ECM-Receptor	KEGG: hsa04512	Endothelial -> Oligodendrocyte precursor (CC)	0.00444051	Endothelial -> Oligodendrocyte precursor	Prefrontal cortex
584	Oligodendrocyte precursor	Newly formed oligodendrocyte	LAMA4	ITGAV_ITGB8	0.169696	3	LAMA4_ITGAV_ITGB8	LAMA4 - (ITGAV+ITGB8)	LAMININ	ECM-Receptor	KEGG: hsa04512	Oligodendrocyte precursor -> Newly formed oligodendrocyte (CC)	0.00275897	Oligodendrocyte precursor -> Newly formed oligodendrocyte	Prefrontal cortex
585	Vascular leptomeningeal cell	Newly formed oligodendrocyte	LAMA4	ITGAV_ITGB8	0.184769	3	LAMA4_ITGAV_ITGB8	LAMA4 - (ITGAV+ITGB8)	LAMININ	ECM-Receptor	KEGG: hsa04512	Vascular leptomeningeal cell -> Newly formed oligodendrocyte (CC)	0.00446203	Vascular leptomeningeal cell -> Newly formed oligodendrocyte	Prefrontal cortex
586	Fibroblast	Newly formed oligodendrocyte	LAMA4	ITGAV_ITGB8	0.238416	3	LAMA4_ITGAV_ITGB8	LAMA4 - (ITGAV+ITGB8)	LAMININ	ECM-Receptor	KEGG: hsa04512	Fibroblast -> Newly formed oligodendrocyte (CC)	0.0150804	Fibroblast -> Newly formed oligodendrocyte	Prefrontal cortex
587	Endothelial	Newly formed oligodendrocyte	LAMA4	ITGAV_ITGB8	0.161587	3	LAMA4_ITGAV_ITGB8	LAMA4 - (ITGAV+ITGB8)	LAMININ	ECM-Receptor	KEGG: hsa04512	Endothelial -> Newly formed oligodendrocyte (CC)	0.00205269	Endothelial -> Newly formed oligodendrocyte	Prefrontal cortex
588	Oligodendrocyte precursor	Astrocyte	LAMA4	ITGAV_ITGB8	0.183102	3	LAMA4_ITGAV_ITGB8	LAMA4 - (ITGAV+ITGB8)	LAMININ	ECM-Receptor	KEGG: hsa04512	Oligodendrocyte precursor -> Astrocyte (CC)	0.0042475	Oligodendrocyte precursor -> Astrocyte	Prefrontal cortex
589	Vascular leptomeningeal cell	Astrocyte	LAMA4	ITGAV_ITGB8	0.200739	3	LAMA4_ITGAV_ITGB8	LAMA4 - (ITGAV+ITGB8)	LAMININ	ECM-Receptor	KEGG: hsa04512	Vascular leptomeningeal cell -> Astrocyte (CC)	0.00686308	Vascular leptomeningeal cell -> Astrocyte	Prefrontal cortex
590	Fibroblast	Astrocyte	LAMA4	ITGAV_ITGB8	0.265285	3	LAMA4_ITGAV_ITGB8	LAMA4 - (ITGAV+ITGB8)	LAMININ	ECM-Receptor	KEGG: hsa04512	Fibroblast -> Astrocyte (CC)	0.023063	Fibroblast -> Astrocyte	Prefrontal cortex
591	Endothelial	Astrocyte	LAMA4	ITGAV_ITGB8	0.173709	3	LAMA4_ITGAV_ITGB8	LAMA4 - (ITGAV+ITGB8)	LAMININ	ECM-Receptor	KEGG: hsa04512	Endothelial -> Astrocyte (CC)	0.00316137	Endothelial -> Astrocyte	Prefrontal cortex
2276	Oligodendrocyte precursor	Microglia (PCDH9high)	LAMA4	ITGAV_ITGB8	0.180587	3	LAMA4_ITGAV_ITGB8	LAMA4 - (ITGAV+ITGB8)	LAMININ	ECM-Receptor	KEGG: hsa04512	Oligodendrocyte precursor -> Microglia (PCDH9high) (Hippo)	0.00393639	Oligodendrocyte precursor -> Microglia (PCDH9high)	Hippocampus
2277	Vascular leptomeningeal cell	Microglia (PCDH9high)	LAMA4	ITGAV_ITGB8	0.188879	3	LAMA4_ITGAV_ITGB8	LAMA4 - (ITGAV+ITGB8)	LAMININ	ECM-Receptor	KEGG: hsa04512	Vascular leptomeningeal cell -> Microglia (PCDH9high) (Hippo)	0.00501966	Vascular leptomeningeal cell -> Microglia (PCDH9high)	Hippocampus
2278	Fibroblast	Microglia (PCDH9high)	LAMA4	ITGAV_ITGB8	0.253307	3	LAMA4_ITGAV_ITGB8	LAMA4 - (ITGAV+ITGB8)	LAMININ	ECM-Receptor	KEGG: hsa04512	Fibroblast -> Microglia (PCDH9high) (Hippo)	0.0192974	Fibroblast -> Microglia (PCDH9high)	Hippocampus
2279	Endothelial	Microglia (PCDH9high)	LAMA4	ITGAV_ITGB8	0.179314	3	LAMA4_ITGAV_ITGB8	LAMA4 - (ITGAV+ITGB8)	LAMININ	ECM-Receptor	KEGG: hsa04512	Endothelial -> Microglia (PCDH9high) (Hippo)	0.00378461	Endothelial -> Microglia (PCDH9high)	Hippocampus
2280	Oligodendrocyte precursor	Oligodendrocyte precursor	LAMA4	ITGAV_ITGB8	0.194946	3	LAMA4_ITGAV_ITGB8	LAMA4 - (ITGAV+ITGB8)	LAMININ	ECM-Receptor	KEGG: hsa04512	Oligodendrocyte precursor -> Oligodendrocyte precursor (Hippo)	0.00591871	Oligodendrocyte precursor -> Oligodendrocyte precursor	Hippocampus
2281	Vascular leptomeningeal cell	Oligodendrocyte precursor	LAMA4	ITGAV_ITGB8	0.204621	3	LAMA4_ITGAV_ITGB8	LAMA4 - (ITGAV+ITGB8)	LAMININ	ECM-Receptor	KEGG: hsa04512	Vascular leptomeningeal cell -> Oligodendrocyte precursor (Hippo)	0.00754337	Vascular leptomeningeal cell -> Oligodendrocyte precursor	Hippocampus
2282	Fibroblast	Oligodendrocyte precursor	LAMA4	ITGAV_ITGB8	0.281875	3	LAMA4_ITGAV_ITGB8	LAMA4 - (ITGAV+ITGB8)	LAMININ	ECM-Receptor	KEGG: hsa04512	Fibroblast -> Oligodendrocyte precursor (Hippo)	0.0287917	Fibroblast -> Oligodendrocyte precursor	Hippocampus
2283	Endothelial	Oligodendrocyte precursor	LAMA4	ITGAV_ITGB8	0.193466	3	LAMA4_ITGAV_ITGB8	LAMA4 - (ITGAV+ITGB8)	LAMININ	ECM-Receptor	KEGG: hsa04512	Endothelial -> Oligodendrocyte precursor (Hippo)	0.00569094	Endothelial -> Oligodendrocyte precursor	Hippocampus
2284	Oligodendrocyte precursor	Newly formed oligodendrocyte	LAMA4	ITGAV_ITGB8	0.168933	3	LAMA4_ITGAV_ITGB8	LAMA4 - (ITGAV+ITGB8)	LAMININ	ECM-Receptor	KEGG: hsa04512	Oligodendrocyte precursor -> Newly formed oligodendrocyte (Hippo)	0.00268656	Oligodendrocyte precursor -> Newly formed oligodendrocyte	Hippocampus
2285	Vascular leptomeningeal cell	Newly formed oligodendrocyte	LAMA4	ITGAV_ITGB8	0.176179	3	LAMA4_ITGAV_ITGB8	LAMA4 - (ITGAV+ITGB8)	LAMININ	ECM-Receptor	KEGG: hsa04512	Vascular leptomeningeal cell -> Newly formed oligodendrocyte (Hippo)	0.00342706	Vascular leptomeningeal cell -> Newly formed oligodendrocyte	Hippocampus
2286	Fibroblast	Newly formed oligodendrocyte	LAMA4	ITGAV_ITGB8	0.23122	3	LAMA4_ITGAV_ITGB8	LAMA4 - (ITGAV+ITGB8)	LAMININ	ECM-Receptor	KEGG: hsa04512	Fibroblast -> Newly formed oligodendrocyte (Hippo)	0.0132351	Fibroblast -> Newly formed oligodendrocyte	Hippocampus
2287	Endothelial	Newly formed oligodendrocyte	LAMA4	ITGAV_ITGB8	0.167817	3	LAMA4_ITGAV_ITGB8	LAMA4 - (ITGAV+ITGB8)	LAMININ	ECM-Receptor	KEGG: hsa04512	Endothelial -> Newly formed oligodendrocyte (Hippo)	0.00258285	Endothelial -> Newly formed oligodendrocyte	Hippocampus
2288	Oligodendrocyte precursor	Astrocyte	LAMA4	ITGAV_ITGB8	0.181156	3	LAMA4_ITGAV_ITGB8	LAMA4 - (ITGAV+ITGB8)	LAMININ	ECM-Receptor	KEGG: hsa04512	Oligodendrocyte precursor -> Astrocyte (Hippo)	0.00400542	Oligodendrocyte precursor -> Astrocyte	Hippocampus
2289	Vascular leptomeningeal cell	Astrocyte	LAMA4	ITGAV_ITGB8	0.189501	3	LAMA4_ITGAV_ITGB8	LAMA4 - (ITGAV+ITGB8)	LAMININ	ECM-Receptor	KEGG: hsa04512	Vascular leptomeningeal cell -> Astrocyte (Hippo)	0.0051076	Vascular leptomeningeal cell -> Astrocyte	Hippocampus
2290	Fibroblast	Astrocyte	LAMA4	ITGAV_ITGB8	0.25441	3	LAMA4_ITGAV_ITGB8	LAMA4 - (ITGAV+ITGB8)	LAMININ	ECM-Receptor	KEGG: hsa04512	Fibroblast -> Astrocyte (Hippo)	0.0196305	Fibroblast -> Astrocyte	Hippocampus
2291	Endothelial	Astrocyte	LAMA4	ITGAV_ITGB8	0.179875	3	LAMA4_ITGAV_ITGB8	LAMA4 - (ITGAV+ITGB8)	LAMININ	ECM-Receptor	KEGG: hsa04512	Endothelial -> Astrocyte (Hippo)	0.003851	Endothelial -> Astrocyte	Hippocampus
2292	Oligodendrocyte precursor	Glutamatergic	LAMA4	ITGAV_ITGB8	0.163722	3	LAMA4_ITGAV_ITGB8	LAMA4 - (ITGAV+ITGB8)	LAMININ	ECM-Receptor	KEGG: hsa04512	Oligodendrocyte precursor -> Glutamatergic (Hippo)	0.00222518	Oligodendrocyte precursor -> Glutamatergic	Hippocampus
2293	Vascular leptomeningeal cell	Glutamatergic	LAMA4	ITGAV_ITGB8	0.170522	3	LAMA4_ITGAV_ITGB8	LAMA4 - (ITGAV+ITGB8)	LAMININ	ECM-Receptor	KEGG: hsa04512	Vascular leptomeningeal cell -> Glutamatergic (Hippo)	0.00283888	Vascular leptomeningeal cell -> Glutamatergic	Hippocampus
2294	Fibroblast	Glutamatergic	LAMA4	ITGAV_ITGB8	0.221657	3	LAMA4_ITGAV_ITGB8	LAMA4 - (ITGAV+ITGB8)	LAMININ	ECM-Receptor	KEGG: hsa04512	Fibroblast -> Glutamatergic (Hippo)	0.0109821	Fibroblast -> Glutamatergic	Hippocampus
2295	Endothelial	Glutamatergic	LAMA4	ITGAV_ITGB8	0.162673	3	LAMA4_ITGAV_ITGB8	LAMA4 - (ITGAV+ITGB8)	LAMININ	ECM-Receptor	KEGG: hsa04512	Endothelial -> Glutamatergic (Hippo)	0.00213925	Endothelial -> Glutamatergic	Hippocampus
2520	Oligodendrocyte precursor	Astrocyte	LAMA4	CD44	0.171868	3	LAMA4_CD44	LAMA4 - CD44	LAMININ	ECM-Receptor	KEGG: hsa04512	Oligodendrocyte precursor -> Astrocyte (Hippo)	0.00297234	Oligodendrocyte precursor -> Astrocyte	Hippocampus
2521	Vascular leptomeningeal cell	Astrocyte	LAMA4	CD44	0.179371	3	LAMA4_CD44	LAMA4 - CD44	LAMININ	ECM-Receptor	KEGG: hsa04512	Vascular leptomeningeal cell -> Astrocyte (Hippo)	0.00379132	Vascular leptomeningeal cell -> Astrocyte	Hippocampus
2522	Fibroblast	Astrocyte	LAMA4	CD44	0.236691	3	LAMA4_CD44	LAMA4 - CD44	LAMININ	ECM-Receptor	KEGG: hsa04512	Fibroblast -> Astrocyte (Hippo)	0.0146265	Fibroblast -> Astrocyte	Hippocampus
2523	Endothelial	Astrocyte	LAMA4	CD44	0.170714	3	LAMA4_CD44	LAMA4 - CD44	LAMININ	ECM-Receptor	KEGG: hsa04512	Endothelial -> Astrocyte (Hippo)	0.00285763	Endothelial -> Astrocyte	Hippocampus
886	Oligodendrocyte precursor	Newly formed oligodendrocyte	LAMA4	DAG1	0.163134	3	LAMA4_DAG1	LAMA4 - DAG1	LAMININ	ECM-Receptor	KEGG: hsa04512	Oligodendrocyte precursor -> Newly formed oligodendrocyte (CC)	0.00217671	Oligodendrocyte precursor -> Newly formed oligodendrocyte	Prefrontal cortex
887	Vascular leptomeningeal cell	Newly formed oligodendrocyte	LAMA4	DAG1	0.177028	3	LAMA4_DAG1	LAMA4 - DAG1	LAMININ	ECM-Receptor	KEGG: hsa04512	Vascular leptomeningeal cell -> Newly formed oligodendrocyte (CC)	0.00352163	Vascular leptomeningeal cell -> Newly formed oligodendrocyte	Prefrontal cortex
888	Fibroblast	Newly formed oligodendrocyte	LAMA4	DAG1	0.225795	3	LAMA4_DAG1	LAMA4 - DAG1	LAMININ	ECM-Receptor	KEGG: hsa04512	Fibroblast -> Newly formed oligodendrocyte (CC)	0.011929	Fibroblast -> Newly formed oligodendrocyte	Prefrontal cortex
889	Endothelial	Newly formed oligodendrocyte	LAMA4	DAG1	0.155623	3	LAMA4_DAG1	LAMA4 - DAG1	LAMININ	ECM-Receptor	KEGG: hsa04512	Endothelial -> Newly formed oligodendrocyte (CC)	0.00161924	Endothelial -> Newly formed oligodendrocyte	Prefrontal cortex
758	Oligodendrocyte precursor	Newly formed oligodendrocyte	LAMA4	SV2A	0.159354	3	LAMA4_SV2A	LAMA4 - SV2A	LAMININ	ECM-Receptor	KEGG: hsa04512	Oligodendrocyte precursor -> Newly formed oligodendrocyte (CC)	0.00188212	Oligodendrocyte precursor -> Newly formed oligodendrocyte	Prefrontal cortex
759	Vascular leptomeningeal cell	Newly formed oligodendrocyte	LAMA4	SV2A	0.17259	3	LAMA4_SV2A	LAMA4 - SV2A	LAMININ	ECM-Receptor	KEGG: hsa04512	Vascular leptomeningeal cell -> Newly formed oligodendrocyte (CC)	0.00304557	Vascular leptomeningeal cell -> Newly formed oligodendrocyte	Prefrontal cortex
760	Fibroblast	Newly formed oligodendrocyte	LAMA4	SV2A	0.218681	3	LAMA4_SV2A	LAMA4 - SV2A	LAMININ	ECM-Receptor	KEGG: hsa04512	Fibroblast -> Newly formed oligodendrocyte (CC)	0.0103282	Fibroblast -> Newly formed oligodendrocyte	Prefrontal cortex
761	Endothelial	Newly formed oligodendrocyte	LAMA4	SV2A	0.152177	3	LAMA4_SV2A	LAMA4 - SV2A	LAMININ	ECM-Receptor	KEGG: hsa04512	Endothelial -> Newly formed oligodendrocyte (CC)	0.00139999	Endothelial -> Newly formed oligodendrocyte	Prefrontal cortex
762	Oligodendrocyte precursor	GABAergic	LAMA4	SV2A	0.213622	3	LAMA4_SV2A	LAMA4 - SV2A	LAMININ	ECM-Receptor	KEGG: hsa04512	Oligodendrocyte precursor -> GABAergic (CC)	0.00926817	Oligodendrocyte precursor -> GABAergic	Prefrontal cortex
763	Vascular leptomeningeal cell	GABAergic	LAMA4	SV2A	0.237844	3	LAMA4_SV2A	LAMA4 - SV2A	LAMININ	ECM-Receptor	KEGG: hsa04512	Vascular leptomeningeal cell -> GABAergic (CC)	0.0149291	Vascular leptomeningeal cell -> GABAergic	Prefrontal cortex
764	Fibroblast	GABAergic	LAMA4	SV2A	0.332076	3	LAMA4_SV2A	LAMA4 - SV2A	LAMININ	ECM-Receptor	KEGG: hsa04512	Fibroblast -> GABAergic (CC)	0.0492247	Fibroblast -> GABAergic	Prefrontal cortex
765	Endothelial	GABAergic	LAMA4	SV2A	0.200997	3	LAMA4_SV2A	LAMA4 - SV2A	LAMININ	ECM-Receptor	KEGG: hsa04512	Endothelial -> GABAergic (CC)	0.00690711	Endothelial -> GABAergic	Prefrontal cortex
766	Oligodendrocyte precursor	Glutamatergic	LAMA4	SV2A	0.204581	3	LAMA4_SV2A	LAMA4 - SV2A	LAMININ	ECM-Receptor	KEGG: hsa04512	Oligodendrocyte precursor -> Glutamatergic (CC)	0.00753615	Oligodendrocyte precursor -> Glutamatergic	Prefrontal cortex
767	Vascular leptomeningeal cell	Glutamatergic	LAMA4	SV2A	0.226745	3	LAMA4_SV2A	LAMA4 - SV2A	LAMININ	ECM-Receptor	KEGG: hsa04512	Vascular leptomeningeal cell -> Glutamatergic (CC)	0.0121521	Vascular leptomeningeal cell -> Glutamatergic	Prefrontal cortex
768	Fibroblast	Glutamatergic	LAMA4	SV2A	0.311461	3	LAMA4_SV2A	LAMA4 - SV2A	LAMININ	ECM-Receptor	KEGG: hsa04512	Fibroblast -> Glutamatergic (CC)	0.0403296	Fibroblast -> Glutamatergic	Prefrontal cortex
769	Endothelial	Glutamatergic	LAMA4	SV2A	0.192956	3	LAMA4_SV2A	LAMA4 - SV2A	LAMININ	ECM-Receptor	KEGG: hsa04512	Endothelial -> Glutamatergic (CC)	0.00561381	Endothelial -> Glutamatergic	Prefrontal cortex
770	Oligodendrocyte precursor	Glutamatergic(Pyr)	LAMA4	SV2A	0.200816	3	LAMA4_SV2A	LAMA4 - SV2A	LAMININ	ECM-Receptor	KEGG: hsa04512	Oligodendrocyte precursor -> Glutamatergic(Pyr) (CC)	0.00687629	Oligodendrocyte precursor -> Glutamatergic(Pyr)	Prefrontal cortex
771	Vascular leptomeningeal cell	Glutamatergic(Pyr)	LAMA4	SV2A	0.222149	3	LAMA4_SV2A	LAMA4 - SV2A	LAMININ	ECM-Receptor	KEGG: hsa04512	Vascular leptomeningeal cell -> Glutamatergic(Pyr) (CC)	0.0110926	Vascular leptomeningeal cell -> Glutamatergic(Pyr)	Prefrontal cortex
[truncated: 1,751 more rows]

## Sheet: Scatter info
	outgoing	incoming	specificity.out.in	specificity	labels
[truncated: 42 more rows]
